# Supplementary material for: scGENA: A Single-Cell Gene Coexpression Network Analysis Framework for Clustering Cell Types and Revealing Biological Mechanisms
Source: MDPI journal article supplement (doi:10.3390/bioengineering9080353), 2022-07-30
Supplement: s1 [file s1]

## Supplementary Materials

scGENA: A single-cell gene co-expression network analysis framework for clustering cell types and revealing biological mechanisms

Yousif A. Algabri<sup>1</sup>, Lingyu Li<sup>1</sup> and Zhi-Ping Liu<sup>1\*</sup>

<sup>1</sup>Department of Biomedical Engineering, School of Control Science and Engineering, Shandong University, Jinan, Shandong 250061, China; algabri@mail.sdu.edu.cn, lingyuli@mail.sdu.edu.cn, zpliu@sdu.edu.cn

\*Correspondence: zpliu@sdu.edu.cn

### 1. Co-expression Networks construction

These networks are constructed for only randomly selected 25 genes in each cell types modules.

Alpha-cells:

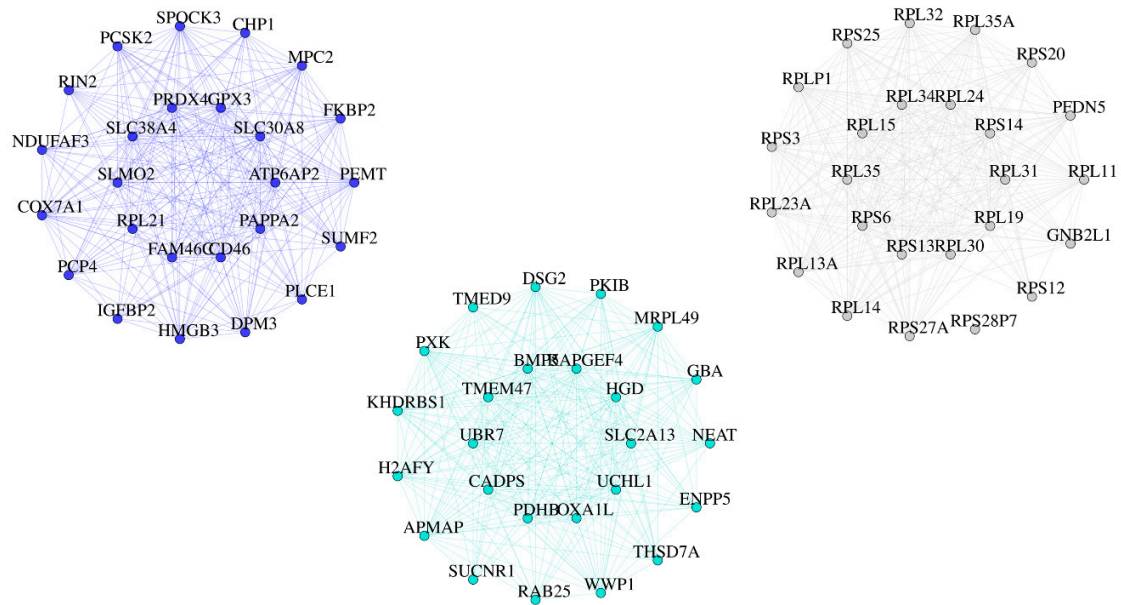

Figure S1: Gene co-expression networks in Alpha.

Delta-Cells

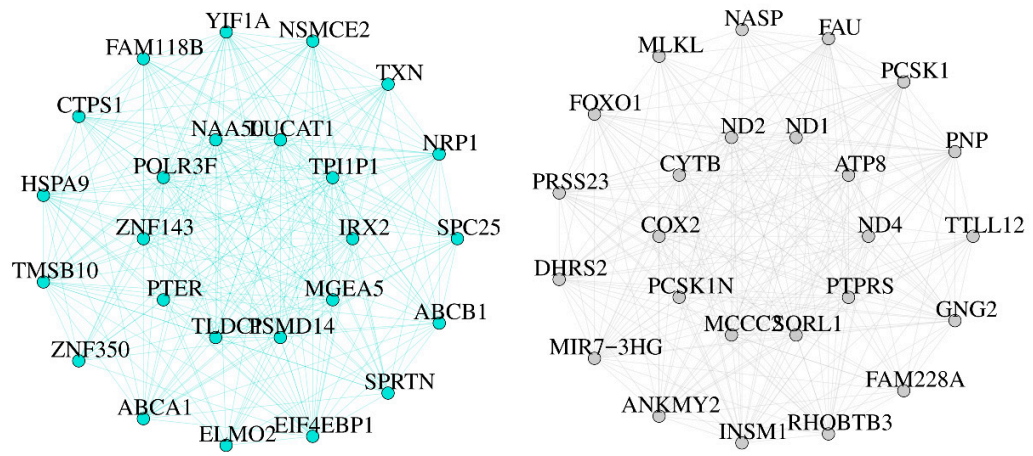

Figure S2: Gene co-expression networks in Delta.

Gamma/PP Cells

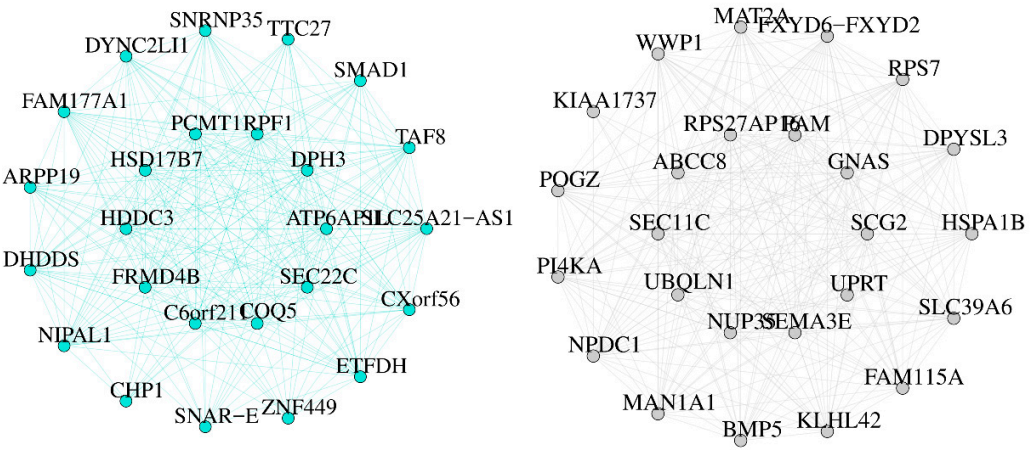

Figure S3: Gene co-expression networks in Delta.

## 2. Differential Co-Expression Analysis

In this step, we identify the differential co-expression genes in all cells type in the islet human pancreatic data. The heatmaps are plotted by MODA package in R.

Alpha genes heatmap:

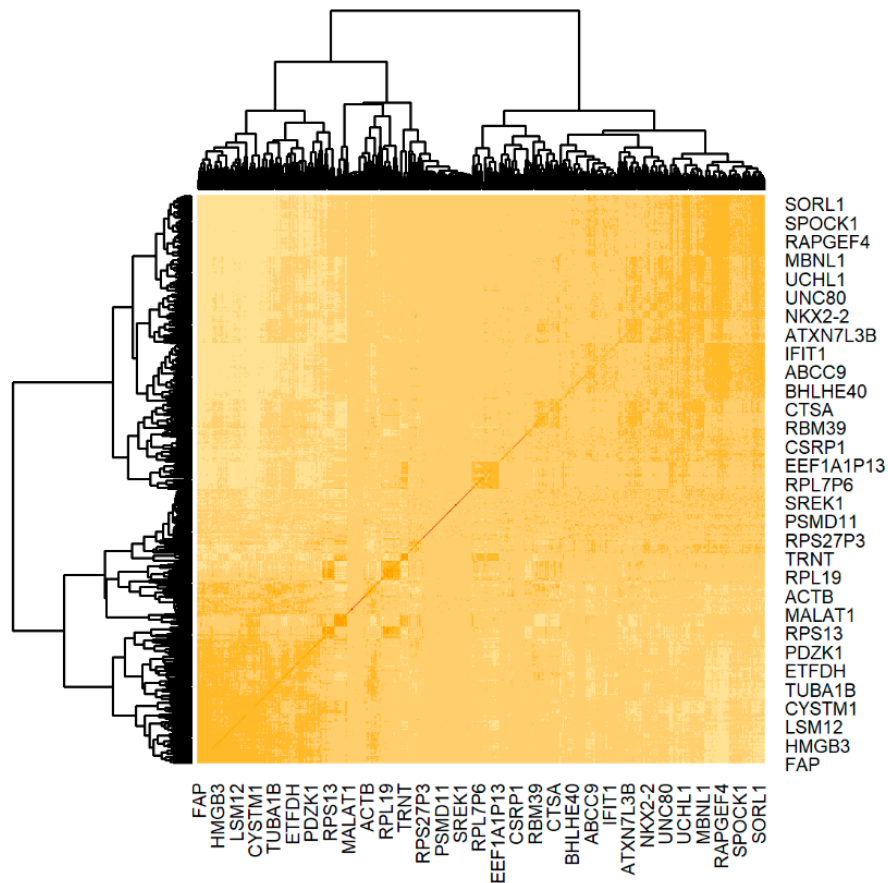

Figure S4: Differential co-expression heatmap for correlated genes in Alpha cells.

Delta genes heatmap:

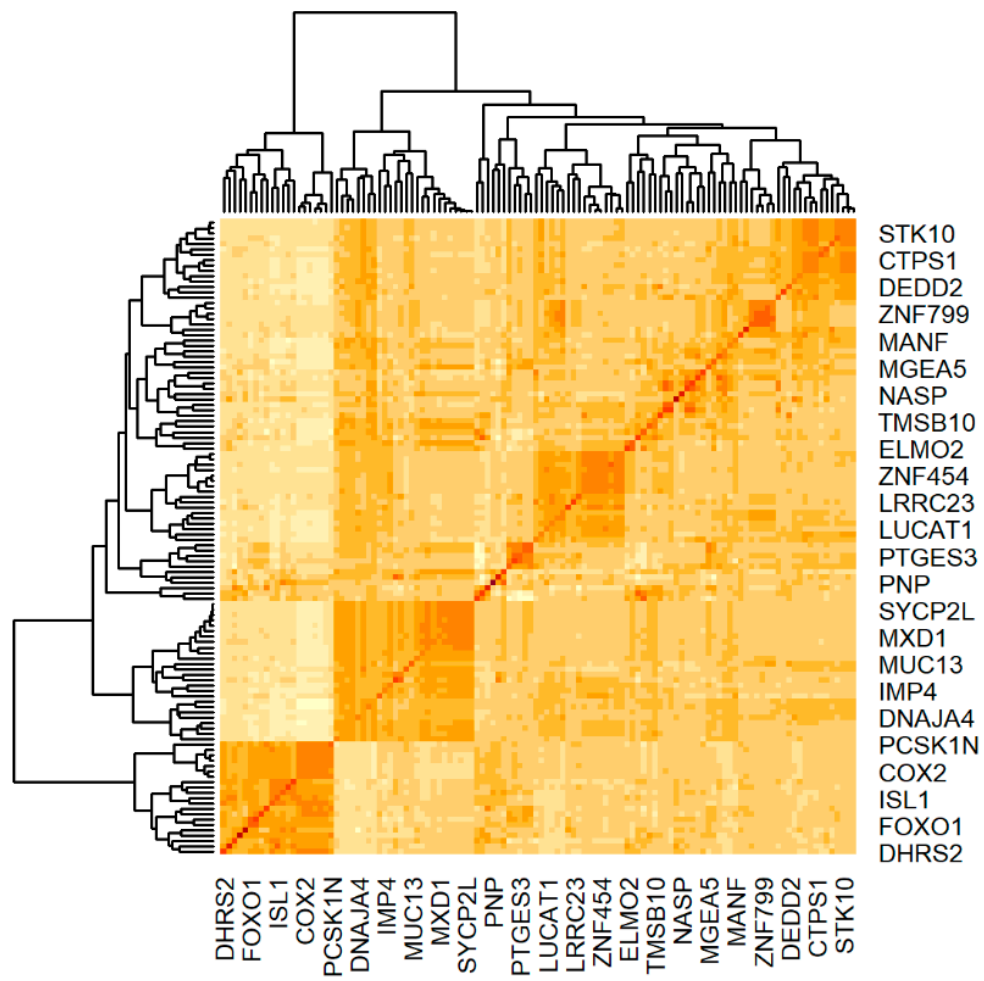

Figure S5: Differential co-expression heatmap for correlated genes in Delta cells.

Gamma genes heatmap:

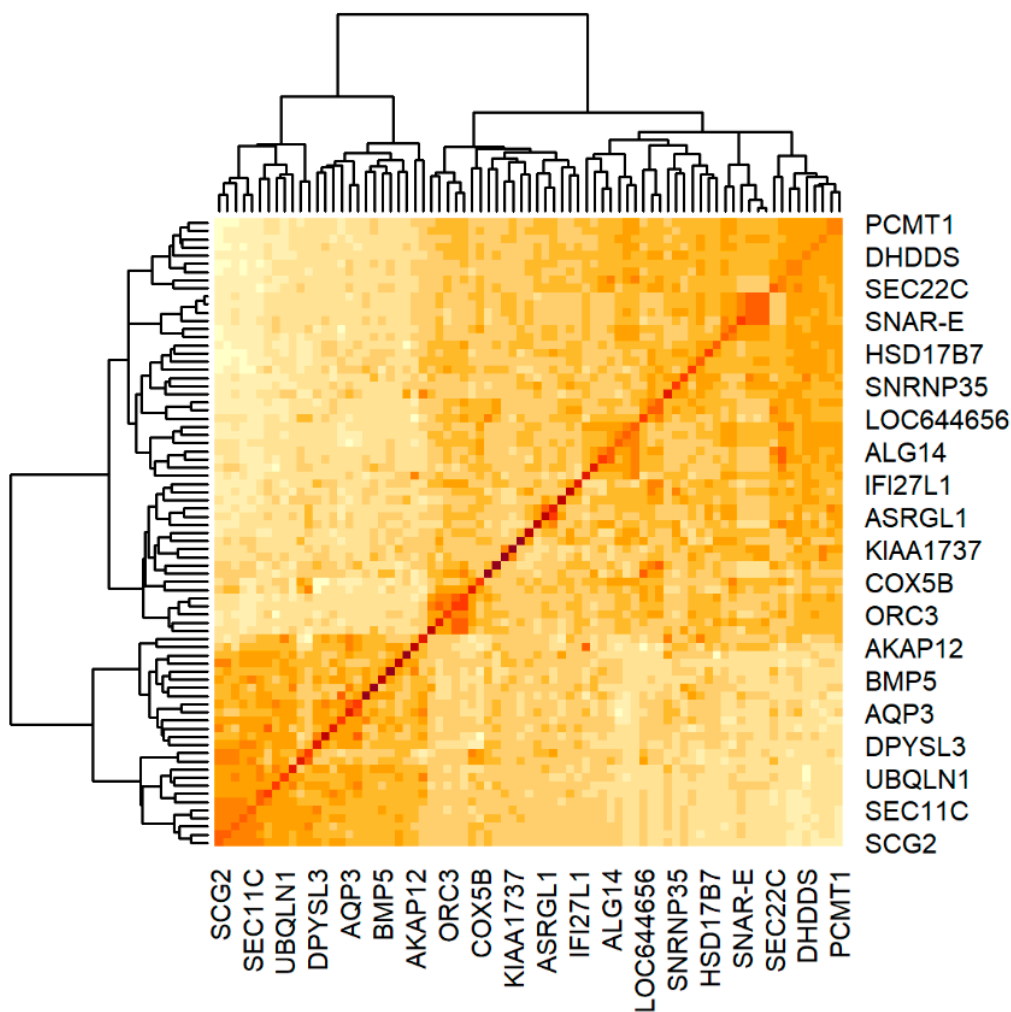

Figure S6: Differential co-expression heatmap for correlated genes in Gamma Cells.
