# Supplementary material for: scGENA: A Single-Cell Gene Coexpression Network Analysis Framework for Clustering Cell Types and Revealing Biological Mechanisms
Source: Bioengineering (Basel). 2022 Jul 30;9(8):353. doi: 10.3390/bioengineering9080353 (PMC9405199; doi:10.3390/bioengineering9080353)
Supplement: Supplementary file 1 [file bioengineering-09-00353-s001.zip]

Archive with 6 entries (6 files):
- bioengineering-1788406-supplementary.pdf
- Table S1.csv
- Table S11-S12 PP Cells GO.xlsx
- Table S2-S4 Alpha Cells GO.xlsx
- Table S5-S8 Beta Cells GO.xlsx
- Table S9-S10 Delta Cells GO.xlsx
