# Supplementary material for: scGENA: A Single-Cell Gene Coexpression Network Analysis Framework for Clustering Cell Types and Revealing Biological Mechanisms
Source: Bioengineering (Basel). 2022 Jul 30;9(8):353. doi: 10.3390/bioengineering9080353 (PMC9405199; doi:10.3390/bioengineering9080353)
Supplement: Supplementary file 1 [file bioengineering-09-00353-s001.zip › Table S1.csv]

	p_val	avg_log2FC	pct.1	pct.2	p_val_adj	cluster	gene
ADCYAP1	9.20822351454305e-220	1.99893835465931	0.945	0.166	2.67434435532874e-215	0	ADCYAP1
MAFA	1.44872687527608e-209	0.27813035040721	0.826	0.05	4.20753746386431e-205	0	MAFA
INS	3.05187037922808e-205	7.10535916223999	1	0.796	8.8635471423921e-201	0	INS
HADH	6.38918020532568e-204	2.59805969207731	0.982	0.297	1.85560960703274e-199	0	HADH
INS-IGF2	5.45293356474444e-200	0.990703785292742	0.993	0.515	1.58369549520873e-195	0	INS-IGF2
NPTX2	2.53732162092097e-183	1.62042809449355	0.974	0.337	7.36914318364077e-179	0	NPTX2
TIMP2	4.97990569618046e-179	1.3424290567528	0.958	0.272	1.44631401134169e-174	0	TIMP2
IAPP	4.84361742372519e-174	6.05826018795434	0.96	0.549	1.40673180837251e-169	0	IAPP
GSN	7.61416990930981e-171	0.986980606695131	0.98	0.362	2.21138336676085e-166	0	GSN
PFKFB2	1.39323550057082e-170	2.66147095826101	0.989	0.751	4.04637386430784e-166	0	PFKFB2
MEG3	2.54078033810461e-163	0.383369538537693	0.98	0.478	7.37918833595723e-159	0	MEG3
CASR	8.60306911428268e-162	0.731868312373525	0.879	0.171	2.49858936286112e-157	0	CASR
SAMD11	7.56333316367128e-160	0.477496313899829	0.841	0.176	2.19661885072505e-155	0	SAMD11
PCSK1	7.57166697701485e-160	1.45711296029753	0.978	0.402	2.19903924013442e-155	0	PCSK1
TGFBR3	1.64016761400458e-157	0.51324682289064	0.731	0.078	4.76353880135351e-153	0	TGFBR3
PDX1	7.16781727831148e-151	0.426914233707864	0.715	0.068	2.08174917214e-146	0	PDX1
DLK1	1.27361675290335e-150	2.66598023796761	0.737	0.115	3.69896513545719e-146	0	DLK1
SCD5	7.67317075845014e-150	0.99371675255272	0.826	0.175	2.22851898337667e-145	0	SCD5
SYNE2	3.91316378470767e-149	0.4970470253756	0.958	0.426	1.13650015799265e-144	0	SYNE2
C1orf127	1.78742944159279e-138	0.59778088646054	0.731	0.103	5.19123132721793e-134	0	C1orf127
SYT13	7.21779373507401e-138	0.9171055759845	0.958	0.492	2.09626383447754e-133	0	SYT13
SORL1	8.16040180976291e-128	0.867436548031493	0.978	0.642	2.37002549760944e-123	0	SORL1
MAP1B	7.19656077058809e-122	1.28273125073669	1	0.988	2.0900971446019e-117	0	MAP1B
RGS16	6.76603326022211e-120	1.05806405145431	0.6	0.068	1.96505903976631e-115	0	RGS16
RPL3	3.87418315718536e-115	1.07468067153581	1	1	1.12517901434134e-110	0	RPL3
RPS6	8.17094668102954e-115	1.02082887497692	1	1	2.37308804457141e-110	0	RPS6
TSPYL1	4.92896787995877e-114	1.30800581316685	1	0.983	1.43152014137643e-109	0	TSPYL1
RPL23	9.01605715490418e-110	1.12236629082089	0.998	0.998	2.61853347949882e-105	0	RPL23
BMP5	4.64134884168329e-109	1.0781997119065	0.775	0.223	1.34798694409008e-104	0	BMP5
RPS3	1.54512412611574e-107	0.950825993513984	1	0.998	4.48750399947794e-103	0	RPS3
TMEM150C	1.94372175938737e-107	0.571656237464026	0.598	0.083	5.64515110578875e-103	0	TMEM150C
RPS25	3.98464606034875e-106	1.03660197512399	0.998	0.996	1.15726075530709e-101	0	RPS25
ND4	4.73169205634178e-106	0.927362918003472	1	1	1.37422532392334e-101	0	ND4
ROBO1	2.26557275421644e-105	0.334949197112879	0.726	0.183	6.57990295007081e-101	0	ROBO1
TBC1D24	3.38655271755495e-104	0.977023712755474	0.85	0.355	9.83556505759483e-100	0	TBC1D24
CADM1	5.88086270454218e-103	1.2439744395425	0.976	0.741	1.70797895528019e-98	0	CADM1
G6PC2	5.10218516663298e-102	2.09741100059388	0.96	0.758	1.48182763794522e-97	0	G6PC2
ABCC8	4.12032845331015e-100	1.14190342305697	0.991	0.891	1.19666699269487e-95	0	ABCC8
PRSS23	4.22559058333221e-98	0.65656136057611	0.797	0.25	1.22723827311717e-93	0	PRSS23
ERO1LB	1.51901636061158e-96	1.37409584447378	1	0.979	4.4116792161242e-92	0	ERO1LB
ENTPD3	3.47276772007813e-96	0.778926700497912	0.574	0.096	1.00859592894229e-91	0	ENTPD3
WSCD2	6.46989626721388e-96	0.3554116752949	0.508	0.06	1.87905197288693e-91	0	WSCD2
TSPAN1	2.55400960926376e-95	1.24961260475537	0.585	0.105	7.41761010818474e-91	0	TSPAN1
CDKN1C	2.72186897831598e-95	2.06196536271793	0.927	0.671	7.90512407372311e-91	0	CDKN1C
UCHL1	4.41861814879901e-95	1.41296821871141	0.976	0.697	1.2832992689557e-90	0	UCHL1
EIF4A2	6.19519760969346e-94	1.28695346449454	1	0.989	1.79927124178327e-89	0	EIF4A2
DHRS7	1.2618547811001e-93	1.48833142175321	0.934	0.622	3.66480484074903e-89	0	DHRS7
PVRL3	6.71793825147511e-91	0.359993197846439	0.726	0.226	1.95109080637592e-86	0	PVRL3
RPL5	1.92806987908074e-90	0.934504385767951	1	0.997	5.5996933498142e-86	0	RPL5
PPP1CB	2.2229480173617e-90	1.0552397783153	1	1	6.45610792682359e-86	0	PPP1CB
ELMO1	1.56013897961423e-89	0.600255765625297	0.874	0.416	4.53111163849362e-85	0	ELMO1
SLC6A6	8.35148109549716e-89	0.366383841001744	0.821	0.358	2.42552065456524e-84	0	SLC6A6
ITPR3	1.26410916000913e-88	0.279514043468762	0.812	0.326	3.6713522334145e-84	0	ITPR3
RPS23	4.03590274161372e-88	0.722049125092272	0.996	0.99	1.17214723324687e-83	0	RPS23
CYTB	4.80771636894498e-88	0.937153824626118	1	1	1.39630506503269e-83	0	CYTB
CYYR1	1.41055274667607e-87	0.269577919330257	0.455	0.042	4.09666834217131e-83	0	CYYR1
PTEN	4.5800456412211e-85	1.23760731887569	0.998	0.982	1.33018265557984e-80	0	PTEN
COX3	1.29280836162778e-84	0.836151007377186	1	1	3.75470332467556e-80	0	COX3
TRNL1	7.64478775378853e-84	1.39229986880105	0.996	0.953	2.2202757073328e-79	0	TRNL1
EEF1A1	2.01150902153247e-83	0.76205437740551	1	0.999	5.84202565123676e-79	0	EEF1A1
SIX3	2.02024025894382e-83	0.311110366913435	0.386	0.02	5.86738378405052e-79	0	SIX3
SCGN	6.14396179760972e-83	1.19459129874897	0.998	0.982	1.78439082487979e-78	0	SCGN
COX2	5.75506908563686e-82	0.754328603851402	1	1	1.67144471454151e-77	0	COX2
RPL15	2.2862459526304e-81	0.711066369533657	1	1	6.63994412022448e-77	0	RPL15
PIPOX	2.3936150039622e-81	0.656986120472155	0.545	0.104	6.95177605600741e-77	0	PIPOX
ZBTB20	2.61559359705499e-81	0.413025509358311	0.998	0.923	7.59646848392679e-77	0	ZBTB20
ND4L	3.34832963633411e-81	0.89283893546816	1	1	9.72455376280515e-77	0	ND4L
HSP90AB1	1.65125015815996e-80	0.936495502828945	1	0.999	4.79572583434397e-76	0	HSP90AB1
EIF2S3	1.07613772912426e-79	1.11173662692155	0.991	0.942	3.12542680669558e-75	0	EIF2S3
ND2	1.41082773910212e-79	0.797878269788095	1	1	4.09746700267428e-75	0	ND2
TRNP	1.44306196209824e-79	1.76489741691935	0.996	0.992	4.19108485652191e-75	0	TRNP
PTPRS	1.59005987022151e-79	0.619276265600764	0.958	0.812	4.61801088108433e-75	0	PTPRS
SCG3	1.66383879380003e-78	0.937110279529056	0.998	0.998	4.83228700883344e-74	0	SCG3
TMEM37	7.30825709469534e-78	0.700787928744935	0.634	0.167	2.12253710801237e-73	0	TMEM37
ATP8	5.47542475577903e-77	0.838527967637243	1	1	1.5902276118209e-72	0	ATP8
RNR2	5.8681689575924e-77	0.814219863834875	1	1	1.70429231035356e-72	0	RNR2
TTC39C	4.42203782517607e-76	0.705899702117579	0.631	0.2	1.28429244556589e-71	0	TTC39C
ND1	2.83954773531653e-75	0.855898298190613	1	1	8.2468984876798e-71	0	ND1
RPS14	6.0266259942377e-75	0.720057569591536	1	0.998	1.75031298750646e-70	0	RPS14
FAM159B	7.01635891786426e-75	1.61905458662037	0.77	0.373	2.03776112051532e-70	0	FAM159B
ANO5	5.36174878627081e-74	1.05834695077621	0.764	0.349	1.55721269999663e-69	0	ANO5
CALD1	5.51071581566834e-74	0.283742676885263	0.543	0.13	1.60047719434456e-69	0	CALD1
CYP2U1	5.89683322876315e-74	0.343420548966793	0.521	0.101	1.71261727462968e-69	0	CYP2U1
PEBP1	1.71369998166043e-73	0.982665357604547	0.998	0.993	4.97709885673639e-69	0	PEBP1
PKIB	2.85850967824108e-73	0.507882343041871	0.74	0.272	8.30196965851557e-69	0	PKIB
ENO1	7.24810224589504e-73	1.29840331224361	0.991	0.938	2.1050663352753e-68	0	ENO1
RBP4	1.00170338195704e-71	1.79490355002129	0.647	0.225	2.90924713221785e-67	0	RBP4
SIX3-AS1	4.95825471048858e-71	0.475538231585543	0.307	0.007	1.4400259155672e-66	0	SIX3-AS1
C8orf47	8.48937380137504e-70	0.727273852331009	0.488	0.094	2.46556883313335e-65	0	C8orf47
RPL4	8.63172860223184e-70	1.01029863023076	0.991	0.985	2.50691293794619e-65	0	RPL4
ABRACL	1.22717097158252e-69	1.25714420355035	0.792	0.403	3.56407265276711e-65	0	ABRACL
OLFM1	3.75994787977222e-69	0.331423334698281	0.51	0.11	1.09200166272225e-64	0	OLFM1
PFDN5	3.97119433203478e-69	0.921312859328505	0.998	0.986	1.15335396985286e-64	0	PFDN5
RPS18	1.56943585051577e-68	0.872991163372915	1	0.998	4.55811254065296e-64	0	RPS18
RPS27A	3.19331906453603e-68	0.706741744467426	1	0.997	9.274356559132e-64	0	RPS27A
GPM6A	8.15895358698553e-68	0.495065613032434	0.444	0.077	2.36960489026821e-63	0	GPM6A
MARCH6	1.75830126543206e-67	0.893578422199959	0.998	0.981	5.10663436519434e-63	0	MARCH6
PRUNE2	1.99105201943103e-67	0.437215847669252	0.887	0.594	5.78261238003353e-63	0	PRUNE2
BHLHE41	4.85277180246278e-67	0.273440091290999	0.572	0.151	1.40939051458927e-62	0	BHLHE41
TOB1	1.42217100432551e-66	1.44602493164626	0.958	0.914	4.13041124786258e-62	0	TOB1
APOL2	1.62818922370886e-66	0.893764928186653	0.905	0.648	4.72874996241763e-62	0	APOL2
RAB12	1.66832476866618e-66	0.350379797518187	0.98	0.864	4.84531562563717e-62	0	RAB12
RPS27	2.58835877271973e-66	1.04960583103721	1	0.998	7.51737038360992e-62	0	RPS27
RPL31	9.82334465766919e-66	0.658031888222767	1	0.997	2.85299398892686e-61	0	RPL31
ARL6IP5	7.08077367598837e-65	1.02774661470741	0.965	0.864	2.0564690987173e-60	0	ARL6IP5
ND3	1.16754329494405e-64	0.850760807879294	1	0.998	3.39089599150601e-60	0	ND3
CAPN13	7.92141527563408e-64	0.3506187965265	0.34	0.03	2.3006166385024e-59	0	CAPN13
EXPH5	2.13040432456795e-63	0.49466791697083	0.545	0.163	6.1873332798427e-59	0	EXPH5
RPS4X	3.56129560191094e-63	0.974687664442292	0.996	0.991	1.03430708166299e-58	0	RPS4X
RPLP1	4.64702665560693e-63	0.704372782353153	1	0.998	1.34963595158792e-58	0	RPLP1
CNP	7.38262327478414e-63	1.03107864796553	0.936	0.789	2.14413527769556e-58	0	CNP
RPL24	9.23309053206919e-63	0.854982231331551	0.991	0.977	2.68156648322885e-58	0	RPL24
RPL7	1.1394281314126e-62	1.08526554934009	1	0.993	3.30924112206162e-58	0	RPL7
RPL34	1.17815817498868e-62	0.664086644918903	1	0.998	3.42172478761963e-58	0	RPL34
HSPA8	1.71576531072978e-62	1.15013381936402	0.991	0.986	4.98309719195249e-58	0	HSPA8
ATP2A3	1.0508934666058e-61	0.302931779178363	0.903	0.652	3.05210989506323e-57	0	ATP2A3
ATP6	1.29536821632894e-61	0.721031137759236	1	1	3.76213791068415e-57	0	ATP6
RPS3A	2.33960089870349e-61	0.801940689434483	1	0.996	6.79490289010455e-57	0	RPS3A
PAFAH1B2	2.68350250461381e-61	0.963066599802497	0.98	0.932	7.79369632414989e-57	0	PAFAH1B2
SEPW1	3.98532740202305e-61	1.04744865152289	0.962	0.804	1.15745863736955e-56	0	SEPW1
ETNK1	4.40374964677419e-61	1.08937683815167	0.974	0.912	1.27898100991263e-56	0	ETNK1
DNAJC3	8.40529145658834e-61	0.92810673226267	0.989	0.957	2.44114879773695e-56	0	DNAJC3
COX1	5.6935426189004e-60	0.883612922066122	1	1	1.65357558280724e-55	0	COX1
TRNS2	3.0040575038425e-59	0.523312903192085	0.691	0.301	8.72468420840978e-55	0	TRNS2
CSNK1A1	5.88366133663416e-59	0.898352504073984	1	0.992	1.70879176199866e-54	0	CSNK1A1
RPL13A	8.14992947695637e-59	0.717232122425444	1	0.997	2.36698401799244e-54	0	RPL13A
ASB9	4.45686769808552e-58	0.612310562545015	0.307	0.026	1.29440808555498e-53	0	ASB9
RPL36	7.13046299927517e-58	0.665331903583558	0.998	0.998	2.07090036887949e-53	0	RPL36
RPL14	5.04092065750445e-57	0.766993673793622	0.991	0.995	1.46403458655902e-52	0	RPL14
MEIS2	4.95728105561238e-56	0.5855050088643	0.923	0.735	1.4397431369815e-51	0	MEIS2
EFNA5	1.31070582426939e-55	0.978963995932799	0.914	0.635	3.8066829254256e-51	0	EFNA5
LDHB	4.11659116045067e-55	1.12508336173058	0.594	0.238	1.19558157072969e-50	0	LDHB
PRKCA	5.78086686645691e-55	0.401139028418086	0.492	0.142	1.67893716402508e-50	0	PRKCA
RRAGD	1.54794044784227e-54	1.05874317994008	0.907	0.742	4.4956834426683e-50	0	RRAGD
RPL23A	1.95599230544288e-54	0.661988482702731	0.998	1	5.68078845269776e-50	0	RPL23A
GLIS3	2.10012936710637e-54	0.27447898438738	0.596	0.225	6.09940572088704e-50	0	GLIS3
MLXIPL	2.92197006363138e-54	0.584266287421321	0.967	0.83	8.48627765580461e-50	0	MLXIPL
MTND2P28	3.00275035527364e-54	0.744453426219839	1	0.999	8.72088785682124e-50	0	MTND2P28
MCC	3.23178403042265e-54	0.259806107205858	0.585	0.203	9.3860703595565e-50	0	MCC
HSP90AA1	3.34372587032565e-54	0.900398765592281	1	1	9.71118304518678e-50	0	HSP90AA1
RNR1	4.87032734763061e-54	0.743893966303462	1	1	1.41448917157236e-49	0	RNR1
NEFM	6.31819493030574e-54	0.263341369473667	0.333	0.043	1.8349933536087e-49	0	NEFM
SFTPA1	1.23769978833008e-53	0.329798188909565	0.258	0.013	3.59465149524706e-49	0	SFTPA1
EEF2	1.26183241498708e-53	0.397770300688588	0.998	0.99	3.66473988284697e-49	0	EEF2
PLCXD3	1.59156031248744e-53	0.61500636804053	0.929	0.773	4.62236861555727e-49	0	PLCXD3
SET	2.37553216568224e-53	0.904146678558792	1	0.997	6.89925806879093e-49	0	SET
ND5	2.40988843341696e-53	0.624359829808798	1	0.999	6.99903897717287e-49	0	ND5
FAM171B	2.44516012328452e-53	1.07325722135556	0.905	0.757	7.10147854605523e-49	0	FAM171B
RASSF6	2.855776526599e-53	0.283856319313814	0.479	0.132	8.29403176620148e-49	0	RASSF6
RELL1	4.26134199477044e-53	1.26008433115012	0.815	0.566	1.23762155554118e-48	0	RELL1
TLK1	5.37386716178702e-53	0.954898189151873	0.987	0.95	1.56073223979781e-48	0	TLK1
RPS11	5.78829781292526e-53	0.684032911612958	1	0.999	1.68109533380788e-48	0	RPS11
TBL1XR1	1.02503302064889e-52	0.980010604752118	0.98	0.898	2.97700340187058e-48	0	TBL1XR1
RPL12	2.01500663084194e-52	0.761793611786059	0.998	0.996	5.85218375795425e-48	0	RPL12
SERINC1	2.92321566809919e-52	0.941160539281166	0.993	0.962	8.48989526486048e-48	0	SERINC1
RNF2	4.63120396037516e-52	0.338355361153565	0.883	0.538	1.34504056621176e-47	0	RNF2
PLEKHA6	6.93700571047409e-52	0.257380878071643	0.779	0.434	2.01471456849299e-47	0	PLEKHA6
SRPRB	9.2126175474949e-52	0.989205754162029	0.956	0.836	2.67562051431895e-47	0	SRPRB
ZDHHC2	1.57437440762641e-51	0.83434928108345	0.965	0.912	4.57245559206938e-47	0	ZDHHC2
ARL4C	2.71199334534892e-51	0.390517609455698	0.481	0.138	7.87644227289686e-47	0	ARL4C
SLC30A8	3.03190604470492e-51	0.94156342269617	0.991	0.974	8.80556472563649e-47	0	SLC30A8
KIAA0247	5.44965743955389e-51	0.828127041862051	0.89	0.719	1.58274401016964e-46	0	KIAA0247
YWHAZ	5.65304136334701e-51	0.827113598024486	0.996	0.989	1.64181280315687e-46	0	YWHAZ
THAP5	7.90727860528211e-51	1.00200913875764	0.932	0.832	2.29651092533208e-46	0	THAP5
SOX4	9.07145528555352e-51	1.03901578821355	0.781	0.52	2.63462275858331e-46	0	SOX4
PRR15L	3.77892649006697e-50	0.343318713271706	0.269	0.022	1.09751362051015e-45	0	PRR15L
NR3C1	5.27669022270456e-50	0.305277335278003	0.83	0.555	1.53250914138008e-45	0	NR3C1
DACH2	7.80066392376593e-50	0.274145056386501	0.283	0.026	2.26554682337934e-45	0	DACH2
DPYSL2	9.92213621170809e-50	0.914261197340504	0.993	0.986	2.88168601996638e-45	0	DPYSL2
EIF3E	1.10019722039429e-49	0.942954891475137	0.976	0.865	3.19530278719114e-45	0	EIF3E
CD24P4	1.50200073435577e-49	0.906134548491462	0.828	0.534	4.36226073278946e-45	0	CD24P4
PRDX1	2.27050199248303e-49	1.009371229155	0.936	0.829	6.59421893676846e-45	0	PRDX1
SCD	2.82985017885969e-49	1.00258210022169	0.996	0.983	8.21873387446221e-45	0	SCD
PFN2	4.11047972720396e-49	1.0571098555435	0.956	0.925	1.19380662717185e-44	0	PFN2
GNAS	1.0444450996362e-48	0.572009707428723	1	1	3.03338190287341e-44	0	GNAS
SLC25A34	2.42949599879973e-48	0.960600647819392	0.486	0.156	7.05598522931406e-44	0	SLC25A34
TRIM2	2.45343704572378e-48	0.451027286063653	0.879	0.653	7.12551721189557e-44	0	TRIM2
HIST1H4C	3.42472302228735e-48	0.808069604744413	0.987	0.973	9.94642307362916e-44	0	HIST1H4C
ENAH	6.5145003090683e-48	0.278178386665061	0.693	0.371	1.89200632476271e-43	0	ENAH
CHP1	7.69168377783251e-48	0.908965028505592	0.98	0.93	2.2338957195959e-43	0	CHP1
PHACTR2	1.00656894591352e-47	0.805252711958479	0.936	0.806	2.92337818961662e-43	0	PHACTR2
CDCP1	2.26485260602581e-47	0.842913498116881	0.804	0.532	6.57781142368076e-43	0	CDCP1
ALDOA	3.33036848849616e-47	0.793713655653337	0.991	0.99	9.67238920113939e-43	0	ALDOA
TXLNA	1.4706659729504e-46	1.19569808741086	0.921	0.755	4.27125518523986e-42	0	TXLNA
IGF1R	2.26477965494451e-46	0.443683933017485	0.954	0.842	6.57759955185533e-42	0	IGF1R
DST	4.01821066227671e-46	0.262596820841371	0.982	0.965	1.16700892264503e-41	0	DST
GPX2	4.79463307484607e-46	1.08241055381202	0.528	0.188	1.39250528392754e-41	0	GPX2
GAD2	6.13729615157958e-46	0.518248257473439	0.949	0.783	1.78245492130326e-41	0	GAD2
DAPL1	9.60524762713339e-46	0.374054122745617	0.283	0.032	2.78965206834835e-41	0	DAPL1
ELAVL4	1.12053110605064e-45	0.497358779597409	0.801	0.512	3.25435849130287e-41	0	ELAVL4
TMEM33	2.68311023742509e-45	0.855159285714512	0.974	0.917	7.79255706255369e-41	0	TMEM33
RPL19	2.89443182448521e-45	0.617381369942319	0.998	0.998	8.40629834785239e-41	0	RPL19
RPL35A	3.05415619359187e-45	0.63460196588911	0.998	0.997	8.87018583304887e-41	0	RPL35A
FTH1	4.68690698699439e-45	1.20570338832555	0.998	0.996	1.36121839623278e-40	0	FTH1
ASAP1	5.72366243728903e-45	0.427388484687631	0.837	0.535	1.66232328166185e-40	0	ASAP1
CXADR	2.56046334984116e-44	0.548764826114322	0.594	0.275	7.43635370694369e-40	0	CXADR
TNFAIP8	3.08909697262673e-44	0.351138466071365	0.32	0.055	8.97166433759982e-40	0	TNFAIP8
DDIT4	4.22112448902049e-44	0.35325458286506	0.446	0.131	1.22594118534622e-39	0	DDIT4
SUSD4	7.14614206366845e-44	0.33069292486933	0.592	0.245	2.07545403955123e-39	0	SUSD4
STX1A	9.01685371823763e-44	0.402476995217085	0.804	0.527	2.61876482538775e-39	0	STX1A
RPL32	1.23035739381802e-43	0.505898190035258	1	0.993	3.57332697886568e-39	0	RPL32
G3BP1	1.73788348746074e-43	0.888460411351579	0.927	0.808	5.04733501263223e-39	0	G3BP1
NDRG4	2.83922348845855e-43	0.263618548112862	0.508	0.173	8.24595677753016e-39	0	NDRG4
EIF1	3.626442544809e-43	0.680500774088718	1	0.999	1.05322770828888e-38	0	EIF1
RPL7A	5.1417978900571e-43	0.78111507490651	0.996	0.992	1.49333236120928e-38	0	RPL7A
VEGFA	5.83388870098718e-43	0.49576059879585	0.982	0.919	1.69433629542771e-38	0	VEGFA
RPS12	6.69959633161099e-43	0.748429278823203	0.993	0.977	1.94576376258978e-38	0	RPS12
RPS20	8.18493914129428e-43	0.525776878596686	0.993	0.993	2.3771518748061e-38	0	RPS20
ALCAM	8.65462263361118e-43	0.604165673955557	0.989	0.936	2.5135620514797e-38	0	ALCAM
CNBP	1.41226251608308e-42	0.702576071022719	0.989	0.958	4.10163402546009e-38	0	CNBP
RUNX1T1	1.53864948832009e-42	0.345764520187406	0.826	0.531	4.46869970892805e-38	0	RUNX1T1
ST13	1.92160427314267e-42	0.796974879017542	0.989	0.966	5.58091529048824e-38	0	ST13
TSPAN13	2.01193798656565e-42	0.714807362319636	0.804	0.521	5.84327149438261e-38	0	TSPAN13
RAPH1	2.82822505434411e-42	0.335812868657358	0.786	0.525	8.21401402533159e-38	0	RAPH1
TRNV	2.89968736682561e-42	0.817139567848853	0.987	0.946	8.42156201947162e-38	0	TRNV
SKP1	3.39153656831694e-42	0.554153032712295	0.998	0.997	9.85003965536288e-38	0	SKP1
EDARADD	5.06325185049805e-42	0.376465953875261	0.689	0.373	1.47052023494015e-37	0	EDARADD
C22orf42	8.33159807336867e-42	0.685109088464811	0.391	0.101	2.41974602844846e-37	0	C22orf42
HNRNPH1	1.64282145055563e-41	0.81950125580345	1	1	4.77124633884872e-37	0	HNRNPH1
DBI	1.70564819467195e-41	0.736500648157102	0.978	0.969	4.95371405178575e-37	0	DBI
RPL36AP37	1.71638343017657e-41	0.687369600248928	0.98	0.939	4.98489239626181e-37	0	RPL36AP37
ANP32E	4.15407586458557e-41	0.888039806050772	0.969	0.901	1.20646825335159e-36	0	ANP32E
RPL30	5.77246838463134e-41	0.5994778226635	0.998	0.995	1.67649799294848e-36	0	RPL30
TOR1AIP2	8.3737576060673e-41	0.42628131376081	0.991	0.973	2.43199042153013e-36	0	TOR1AIP2
SPCS2	1.04170670295623e-40	0.704876419505357	0.956	0.902	3.02542877739579e-36	0	SPCS2
LOC100996517	1.95087402891739e-40	0.312111816327033	1	0.984	5.66592344218477e-36	0	LOC100996517
CDKN1A	5.90572378820633e-40	0.799099943564958	0.596	0.292	1.71519935980876e-35	0	CDKN1A
DHRS2	9.86486545740981e-40	0.496940116482194	0.51	0.189	2.86505287479553e-35	0	DHRS2
THRAP3	1.59886311245182e-39	0.490851033663348	0.991	0.979	4.64357813749383e-35	0	THRAP3
AES	2.22823306088466e-39	0.537194687451181	0.98	0.962	6.47145727872733e-35	0	AES
RPL26	2.6054452018033e-39	0.622075679968297	0.996	0.991	7.56699449959732e-35	0	RPL26
SVIP	3.47850165538784e-39	0.673008364533708	0.976	0.914	1.01026123577429e-34	0	SVIP
TAGLN3	3.91958396749155e-39	0.584086518538812	0.6	0.283	1.13836477167857e-34	0	TAGLN3
C14orf132	4.16077740752563e-39	0.330669746758394	0.77	0.511	1.20841458246767e-34	0	C14orf132
LINC00263	5.20634531023457e-39	0.359120886521931	0.828	0.673	1.51207886845143e-34	0	LINC00263
PTMA	5.37490900439442e-39	0.556912366666858	1	0.999	1.56103482214627e-34	0	PTMA
FAM76A	6.73778718580128e-39	0.849424330501364	0.916	0.808	1.95685553237227e-34	0	FAM76A
PIR	1.40372573957573e-38	0.647529405133982	0.406	0.121	4.0768406654498e-34	0	PIR
MGAT4A	1.78530481994623e-38	0.365371591621057	0.817	0.558	5.18506078856984e-34	0	MGAT4A
RUFY3	1.94626079112056e-38	0.6075453900727	0.978	0.942	5.65252521565143e-34	0	RUFY3
YWHAE	2.98934344105713e-38	0.589775751457486	1	0.999	8.68195015586223e-34	0	YWHAE
RPL8	3.69682003725844e-38	0.617643023498511	0.998	0.998	1.07366744342097e-33	0	RPL8
SLC17A6	4.49217301894012e-38	0.261374398860008	0.272	0.042	1.30466180989078e-33	0	SLC17A6
RPL37	6.19315849867087e-38	0.444321304552577	0.998	0.983	1.79867902276898e-33	0	RPL37
FAM105A	7.41665443694718e-38	0.277738110970487	0.731	0.429	2.15401894812257e-33	0	FAM105A
NPM1	8.00901787158998e-38	0.725922822095877	0.991	0.99	2.32605906044588e-33	0	NPM1
PLCB4	2.01537369405989e-37	0.478409130062829	0.768	0.5	5.85324981965813e-33	0	PLCB4
PPM1H	2.0957166083551e-37	0.600137890944532	0.731	0.468	6.08658974564571e-33	0	PPM1H
MPP1	4.50377445924529e-37	0.620316928143411	0.428	0.142	1.30803121619861e-32	0	MPP1
WSB2	4.62003157074535e-37	0.662879119685536	0.982	0.961	1.34179576909157e-32	0	WSB2
PCMTD1	5.12464151501552e-37	0.688899243615703	0.949	0.885	1.48834963520596e-32	0	PCMTD1
RASGEF1B	6.52294066651881e-37	0.859886427063072	0.863	0.686	1.89445765777706e-32	0	RASGEF1B
SEC62	9.085985491414e-37	0.361147161621269	1	0.992	2.63884276627137e-32	0	SEC62
MYT1L	1.02456039297769e-36	0.253553738660231	0.7	0.402	2.97563074932511e-32	0	MYT1L
ATP6V1G1	1.35990029668537e-36	0.594643438338234	0.989	0.993	3.94955843166331e-32	0	ATP6V1G1
RCBTB2	1.54283612556391e-36	0.424125254393049	0.437	0.151	4.48085895947528e-32	0	RCBTB2
BTG3	1.90881530559134e-36	0.577186302964162	0.848	0.589	5.54377229202893e-32	0	BTG3
DNAJB9	2.05398468488515e-36	0.973785933848698	0.79	0.54	5.96538772031194e-32	0	DNAJB9
DUSP7	3.04042782430785e-36	0.267821988739599	0.4	0.123	8.8303145301373e-32	0	DUSP7
PSAP	3.43095057112989e-36	0.703936525287859	1	0.996	9.96450974373253e-32	0	PSAP
TPM3	5.08262815509323e-36	0.375775030994537	0.947	0.909	1.47614769508373e-31	0	TPM3
PSMB4	7.29808440742061e-36	0.988186712017732	0.96	0.922	2.11958265444717e-31	0	PSMB4
ROBO2	7.30806347558094e-36	0.311617298003737	0.74	0.505	2.12248087521297e-31	0	ROBO2
RPL10	1.1270816020695e-35	0.523910464412823	0.996	0.985	3.27338309689044e-31	0	RPL10
GNB2L1	1.48120487066157e-35	0.721335064817049	0.996	0.995	4.30186330586241e-31	0	GNB2L1
SURF4	2.11825460614821e-35	0.573794866233088	0.943	0.884	6.15204685263625e-31	0	SURF4
EEF1G	2.54971987493127e-35	0.776120573799929	0.993	0.992	7.4051514327629e-31	0	EEF1G
RPS13	5.40311032872894e-35	0.573884713971609	0.996	0.991	1.56922533277274e-30	0	RPS13
UBC	7.11595779322866e-35	0.72234800963579	0.996	0.997	2.0666876218874e-30	0	UBC
CCNI	1.08739077958832e-34	0.587762358387018	0.974	0.969	3.15810904115835e-30	0	CCNI
FNIP1	1.16541041800498e-34	0.598325072525553	0.936	0.852	3.38470147701185e-30	0	FNIP1
APLP2	1.19223333444557e-34	0.543237735579714	0.974	0.942	3.46260327323028e-30	0	APLP2
SDC4	1.94033861930197e-34	0.355292165850945	0.404	0.144	5.6353254520387e-30	0	SDC4
RPL27A	2.60451893541013e-34	0.308834206953489	0.998	0.996	7.56430434411163e-30	0	RPL27A
CACNA2D1	3.6579120049102e-34	0.257429844870177	0.726	0.441	1.06236738358607e-29	0	CACNA2D1
ANKRD40	9.17663694814898e-34	0.680536450854909	0.89	0.801	2.66517066885091e-29	0	ANKRD40
SRGAP2C	1.04823718120447e-33	0.460414167660109	0.857	0.675	3.04439524537213e-29	0	SRGAP2C
CYP51A1	1.13659070808378e-33	0.600899506501225	0.985	0.966	3.30100039348772e-29	0	CYP51A1
TFF3	1.40555099018832e-33	0.756941995881541	0.581	0.317	4.08214174080393e-29	0	TFF3
SEC11C	1.67480925622737e-33	0.688641135276253	0.991	0.957	4.86414852286115e-29	0	SEC11C
LINC00657	1.81710308066164e-33	0.617438393577543	0.996	0.992	5.27741247716561e-29	0	LINC00657
TRA2A	2.61459347926303e-33	0.740483159976062	0.996	0.985	7.59356384182361e-29	0	TRA2A
NACA	3.28537295762983e-33	0.500045754960557	0.978	0.97	9.54170868084432e-29	0	NACA
ZNF652	3.81190696957743e-33	0.581445457988914	0.883	0.816	1.10709214117437e-28	0	ZNF652
RPS29	3.9195696390126e-33	0.383531404330892	0.996	0.995	1.13836061025843e-28	0	RPS29
LIN7C	4.19882265586828e-33	0.652327316611814	0.934	0.865	1.21946406394383e-28	0	LIN7C
NPY	6.18485791545206e-33	1.82748338518063	0.424	0.158	1.79626828438474e-28	0	NPY
DLG5	7.62128226285117e-33	0.286684509617211	0.744	0.497	2.21344900759986e-28	0	DLG5
RPL6	1.03662038166042e-32	0.591927639486195	0.993	0.981	3.01065657445636e-28	0	RPL6
EIF4B	1.81192539909387e-32	0.728298361508609	0.962	0.919	5.26237493658834e-28	0	EIF4B
NTPCR	2.22484729971881e-32	0.710292097050991	0.698	0.425	6.46162401257333e-28	0	NTPCR
MPP6	2.63905588098383e-32	0.618154556964548	0.96	0.895	7.66460999514134e-28	0	MPP6
ID3	9.56740669657211e-32	0.741346326896696	0.364	0.122	2.77866192688544e-27	0	ID3
RDH10	1.15917155222281e-31	0.627413156434835	0.472	0.214	3.36658193912071e-27	0	RDH10
PJA2	2.17325831286102e-31	0.683592002894278	0.958	0.935	6.31179411804226e-27	0	PJA2
MAP2	3.00539195727973e-31	0.385357333349645	0.879	0.71	8.72855986152753e-27	0	MAP2
RPL35	3.77892164242889e-31	0.523569578070455	0.998	0.994	1.09751221261062e-26	0	RPL35
DDX5	3.96223684640528e-31	0.664634010667667	0.998	0.995	1.15075244730149e-26	0	DDX5
CALM1	6.18735521959103e-31	0.546669897981455	1	1	1.79699357642582e-26	0	CALM1
MORF4L1	7.05686133678288e-31	0.548997093264465	0.998	0.998	2.04952423804185e-26	0	MORF4L1
TMBIM4	1.1023409287772e-30	0.599864691302162	0.978	0.939	3.20152875944763e-26	0	TMBIM4
PRMT2	1.76048977161868e-30	0.432504623623687	0.943	0.886	5.11299044371212e-26	0	PRMT2
FXYD2	3.80214470038318e-30	1.30766458917338	0.865	0.789	1.10425688533229e-25	0	FXYD2
RPL36AL	4.71190492840172e-30	0.608295950350752	0.987	0.975	1.36847854835571e-25	0	RPL36AL
CLCN3	7.72459912913464e-30	0.40406187139356	0.896	0.754	2.24345532507457e-25	0	CLCN3
CLK1	8.94785356445695e-30	0.777568262494932	0.905	0.778	2.59872511072523e-25	0	CLK1
SOCS2	1.0091121970035e-29	0.354329507544662	0.353	0.113	2.93076455375727e-25	0	SOCS2
TPT1	1.02674725003825e-29	0.479491310236978	0.998	0.998	2.98198203828609e-25	0	TPT1
RPL21P16	1.47086581164644e-29	0.909826056469923	0.993	0.997	4.27183557676477e-25	0	RPL21P16
RPL41	1.87709114591014e-29	0.708069119612475	1	0.999	5.45163581506683e-25	0	RPL41
TXNRD1	2.95167403448835e-29	0.422106241105448	0.733	0.497	8.57254689836452e-25	0	TXNRD1
ARID1B	3.59455560856863e-29	0.300459049507781	0.958	0.915	1.04396678539659e-24	0	ARID1B
SLMO2	1.06005446592619e-28	0.7759358482082	0.967	0.924	3.07871618538942e-24	0	SLMO2
ANAPC16	1.12758106795088e-28	0.470334920714981	0.967	0.936	3.27483369564973e-24	0	ANAPC16
GEM	1.20186180819376e-28	0.417874787173888	0.362	0.122	3.49056724953713e-24	0	GEM
MXRA7	1.22350478579433e-28	0.371486126899001	0.896	0.76	3.55342494938246e-24	0	MXRA7
RPL11	1.80857593624447e-28	0.624705687294447	0.996	0.99	5.25264709163481e-24	0	RPL11
PRKAR2B	1.85376754123372e-28	0.261664720672509	0.318	0.093	5.38389707000509e-24	0	PRKAR2B
TRND	2.07956381454885e-28	0.432975250716957	0.817	0.605	6.03967718659424e-24	0	TRND
USP22	2.10000390424984e-28	0.595964565713367	0.945	0.878	6.09904133911281e-24	0	USP22
MDH1	3.96185034690511e-28	0.649040261218922	0.951	0.937	1.15064019625165e-23	0	MDH1
HNRNPC	4.50913694106955e-28	0.480779165047907	0.982	0.978	1.30958864179483e-23	0	HNRNPC
CSDE1	5.08079962556269e-28	0.682655024833572	0.991	0.96	1.47561663525217e-23	0	CSDE1
RPL18	6.86198235349092e-28	0.54429123018762	0.987	0.974	1.99292553492437e-23	0	RPL18
PRKACB	9.75223818676759e-28	0.328281081768491	0.792	0.573	2.83234253658291e-23	0	PRKACB
SARS	1.10390877222295e-27	0.855731450003083	0.94	0.914	3.20608224716713e-23	0	SARS
RPS10-NUDT3	1.18026969482613e-27	0.507563714784458	0.985	0.969	3.42785727468354e-23	0	RPS10-NUDT3
STT3A	1.36510044369637e-27	0.642423881322659	0.978	0.943	3.96466121862736e-23	0	STT3A
RPL18A	1.40145474783877e-27	0.588162875750782	0.996	0.993	4.07024502414815e-23	0	RPL18A
ND6	1.42412517470482e-27	0.500467529484845	1	1	4.1360867448952e-23	0	ND6
RPS15A	1.44935455365746e-27	0.535883992779181	0.974	0.971	4.20936043018736e-23	0	RPS15A
NUDT19	1.50067545248601e-27	0.814707574975763	0.733	0.55	4.35841171665512e-23	0	NUDT19
KCNK16	1.76244886431262e-27	0.687225457221689	0.819	0.585	5.11868023662315e-23	0	KCNK16
NAP1L1	2.40170811895026e-27	0.447959637703432	0.987	0.97	6.97528088986724e-23	0	NAP1L1
RNF130	2.78598891015387e-27	0.313177869062157	0.68	0.424	8.09134759175988e-23	0	RNF130
MT1F	3.45888862639088e-27	0.850366712367889	0.733	0.511	1.0045650237627e-22	0	MT1F
TMEM64	4.26685959775556e-27	0.361270408510787	0.508	0.256	1.23922403297615e-22	0	TMEM64
DAD1	4.87247574769017e-27	0.608868560412523	0.98	0.954	1.41511313140166e-22	0	DAD1
CPD	5.72391672192865e-27	0.349572736120712	0.823	0.653	1.66239713354974e-22	0	CPD
SLC2A13	6.06577444560359e-27	0.32416697074868	0.709	0.481	1.76168287223665e-22	0	SLC2A13
CTBP1	6.19972574597207e-27	0.399918084754269	0.993	0.985	1.80058634840267e-22	0	CTBP1
RAB33B	6.28939408349846e-27	0.743405544683746	0.709	0.517	1.82662872367046e-22	0	RAB33B
RPL17	9.59005597424559e-27	0.794815383166164	0.996	0.99	2.78523995660015e-22	0	RPL17
RPL13	9.68610960613885e-27	0.367791531639742	0.991	0.986	2.81313681291091e-22	0	RPL13
SOD1	1.0297666909306e-26	0.592455033389879	0.991	0.974	2.99075140046975e-22	0	SOD1
ARID5B	1.53366804354234e-26	0.631116673203345	0.784	0.605	4.45423209886003e-22	0	ARID5B
NFE2L2	1.61639479707219e-26	0.528665765674993	0.832	0.633	4.69449540913677e-22	0	NFE2L2
RPS10	2.37303005335754e-26	0.382469893346607	0.978	0.969	6.89199118396629e-22	0	RPS10
EPRS	2.50330268368161e-26	0.519785383055963	0.936	0.872	7.27034198421651e-22	0	EPRS
SNRPN	2.70060186306977e-26	0.762562147134987	0.996	0.989	7.84335799091352e-22	0	SNRPN
CCND2	2.81018782854816e-26	0.657028395480003	0.784	0.727	8.16162851045242e-22	0	CCND2
KIAA1715	3.15072663363676e-26	0.550801056909735	0.74	0.553	9.15065536207123e-22	0	KIAA1715
GOLGB1	3.26483908290532e-26	0.317766259664346	0.934	0.902	9.48207214848193e-22	0	GOLGB1
TRNM	6.32440728720222e-26	0.475397198791011	0.583	0.314	1.83679760842214e-21	0	TRNM
PERP	6.54267788748773e-26	0.385966571370872	0.925	0.783	1.90018993886306e-21	0	PERP
CDS2	6.98490104844091e-26	0.372891333347362	0.916	0.895	2.02862481149869e-21	0	CDS2
BTF3	9.77929051497611e-26	0.610693879940244	0.943	0.891	2.84019934426451e-21	0	BTF3
SRSF3	1.27156202048832e-25	0.664514893597633	0.965	0.964	3.69299757610422e-21	0	SRSF3
BROX	1.3025151531566e-25	0.810218711019683	0.905	0.863	3.78289475931273e-21	0	BROX
SMAD9	1.4412690451483e-25	0.423686311009685	0.585	0.338	4.18587768782419e-21	0	SMAD9
ATP6V0E1	3.46445451008894e-25	0.541868338239729	0.976	0.969	1.00618152336513e-20	0	ATP6V0E1
CACUL1	4.47074627721716e-25	0.744523383569574	0.881	0.79	1.29843884129218e-20	0	CACUL1
VPS35	5.17398924057838e-25	0.501798921290004	0.923	0.876	1.50268169514118e-20	0	VPS35
RPL21P75	1.39380959897985e-24	0.485832746838494	0.996	0.985	4.04804121831719e-20	0	RPL21P75
LRRC16A	1.54461865602381e-24	0.474788403915658	0.812	0.658	4.48603596268994e-20	0	LRRC16A
G3BP2	1.74491809953969e-24	0.433228031067779	0.936	0.893	5.06776563649313e-20	0	G3BP2
RPL7P23	2.00333512413751e-24	0.469122052895108	0.991	0.976	5.81828620103258e-20	0	RPL7P23
PDCD4	2.41477442731464e-24	0.556856042873336	0.998	0.983	7.01322936924991e-20	0	PDCD4
CHURC1	3.00969745664657e-24	0.443612307378906	0.934	0.86	8.74106432333864e-20	0	CHURC1
SAR1B	3.71266766489638e-24	0.601615970825248	0.962	0.931	1.07827006991586e-19	0	SAR1B
TTC3	3.77309373460584e-24	0.348335464567237	0.998	0.994	1.09581961334158e-19	0	TTC3
NONO	4.28206163172727e-24	0.627524592956369	0.927	0.874	1.24363915970255e-19	0	NONO
ATRX	4.8922644411084e-24	0.31969838493928	0.985	0.981	1.42086036163111e-19	0	ATRX
TBCA	5.0494352186294e-24	0.400148475870821	0.982	0.976	1.46650747054654e-19	0	TBCA
RPL37A	5.50614625663301e-24	0.417840107664736	0.998	0.999	1.59915005731393e-19	0	RPL37A
RPS19	5.9158729778723e-24	0.404121566498821	0.998	0.997	1.71814698896345e-19	0	RPS19
IGFBP5	7.01963030993765e-24	0.59612918894595	0.726	0.58	2.03871123091519e-19	0	IGFBP5
NUDT9	7.69325626589502e-24	0.455985278011644	0.717	0.55	2.23435241730389e-19	0	NUDT9
ACAT1	7.84351601979462e-24	0.777207061764837	0.894	0.786	2.27799235762895e-19	0	ACAT1
EAF1	8.55027416813787e-24	0.584700287101685	0.834	0.699	2.48325612665228e-19	0	EAF1
CALM2	9.29523033695546e-24	0.401578092710839	1	0.997	2.69961374676198e-19	0	CALM2
SNX10	1.00002285544744e-23	0.32699864694818	0.545	0.304	2.90436637907599e-19	0	SNX10
RPS16	1.04024377189458e-23	0.551704547196583	0.987	0.973	3.02117998671344e-19	0	RPS16
NAPA	1.0413884981592e-23	0.518494303537913	0.854	0.738	3.02450461520378e-19	0	NAPA
DSP	1.37475896621452e-23	0.479880957950648	0.987	0.985	3.99271246557683e-19	0	DSP
PSMB5	1.52212714618298e-23	0.62409190794596	0.967	0.951	4.42071387065922e-19	0	PSMB5
STRN3	1.83830866134821e-23	0.630358871259983	0.94	0.882	5.33899984515361e-19	0	STRN3
JUND	1.85666687390227e-23	0.390997205101338	1	0.996	5.39231760187437e-19	0	JUND
PGRMC2	1.97739210129919e-23	0.436866401891492	0.943	0.89	5.74293987980323e-19	0	PGRMC2
TRNE	2.55195961401025e-23	0.6863529190321	0.978	0.966	7.41165630696998e-19	0	TRNE
DCUN1D4	2.87965349856817e-23	0.736986006882255	0.841	0.718	8.36337765589153e-19	0	DCUN1D4
TOMM7	2.92211931165674e-23	0.547052464465309	0.969	0.948	8.48671111684466e-19	0	TOMM7
EXOSC6	3.02882377446789e-23	0.58557551746084	0.885	0.785	8.79661288818709e-19	0	EXOSC6
RPL38	3.25302286263668e-23	0.464586595702502	1	0.992	9.44775429995572e-19	0	RPL38
ENO2	3.41410248668878e-23	0.660345023130262	0.801	0.653	9.91557785209021e-19	0	ENO2
PRDX3	3.62549466195687e-23	0.611002123284743	0.974	0.962	1.05295241467213e-18	0	PRDX3
LRPPRC	4.22413589304568e-23	0.430672809266506	0.845	0.722	1.22681578741726e-18	0	LRPPRC
OTUD3	6.16247367839604e-23	0.382032629248148	0.49	0.261	1.78976723041656e-18	0	OTUD3
SNHG5	6.36490512999125e-23	0.267811509859483	0.806	0.652	1.84855939690336e-18	0	SNHG5
NDUFB4	6.55293013892962e-23	0.440534427031317	0.976	0.972	1.90316750024933e-18	0	NDUFB4
PRDX5	7.77079445329401e-23	0.577334756943149	0.987	0.979	2.25687183307018e-18	0	PRDX5
RPL27	8.23236998553347e-23	0.429943333840321	0.998	0.993	2.39092721489849e-18	0	RPL27
LYRM2	1.04515498166851e-22	0.441056031726886	0.859	0.791	3.03544361325986e-18	0	LYRM2
RNF6	1.45149548340295e-22	0.569596634479104	0.662	0.453	4.21557833244718e-18	0	RNF6
OCIAD2	1.63285688344458e-22	0.742758854224041	0.823	0.714	4.74230624658811e-18	0	OCIAD2
CIRBP	1.64640094427205e-22	0.514233443127441	0.971	0.93	4.78164226244932e-18	0	CIRBP
CANX	1.76246985343969e-22	0.492707585432151	0.987	0.976	5.11874119534488e-18	0	CANX
EEF1D	1.90117133746517e-22	0.276805965473436	0.843	0.689	5.5215719154001e-18	0	EEF1D
RTN4	2.44447597184045e-22	0.462176501797339	0.985	0.992	7.09949156501621e-18	0	RTN4
EEF1A1P5	3.11516116840393e-22	0.47219930019287	1	1	9.04736258139553e-18	0	EEF1A1P5
RBBP8	3.15961798685812e-22	0.278177017765483	0.51	0.277	9.17647851923202e-18	0	RBBP8
PSAT1	4.67013853268376e-22	0.623016761601359	0.294	0.101	1.35634833404735e-17	0	PSAT1
EMP2	5.29584694976488e-22	0.300450428226029	0.605	0.388	1.53807282962021e-17	0	EMP2
UBXN1	5.49949235561415e-22	0.554249713538847	0.744	0.56	1.59721756484102e-17	0	UBXN1
TMED6	5.6416766948729e-22	0.820948852884494	0.455	0.24	1.63851216249194e-17	0	TMED6
BNIP3L	5.90350793461256e-22	0.544221332693091	0.938	0.84	1.71455580944952e-17	0	BNIP3L
FAM115A	7.98746569083226e-22	0.290378119605873	0.843	0.705	2.31979966058841e-17	0	FAM115A
COX4I1	8.29164926603644e-22	0.44360200319946	0.991	0.989	2.40814369633496e-17	0	COX4I1
RANBP2	8.86040579003514e-22	0.285673735921039	0.962	0.927	2.57332765359991e-17	0	RANBP2
SLC39A14	9.52493430991932e-22	0.267765983181877	0.675	0.481	2.76632667162987e-17	0	SLC39A14
HLTF	1.10266805371986e-21	0.433867283921667	0.894	0.834	3.2024788284186e-17	0	HLTF
C11orf58	1.28140258006564e-21	0.411722999295995	0.974	0.979	3.72157751328463e-17	0	C11orf58
ARHGEF3	1.44097098530605e-21	0.303273619817774	0.572	0.333	4.18501203262436e-17	0	ARHGEF3
IFNGR1	1.45896034522644e-21	0.415676619191805	0.702	0.504	4.23725853064114e-17	0	IFNGR1
RNF13	1.55019549561615e-21	0.519790160208689	0.797	0.615	4.50223277791797e-17	0	RNF13
C11orf1	1.83685853413606e-21	0.45767412755639	0.74	0.537	5.33478824069136e-17	0	C11orf1
RPL29	2.08750017171651e-21	0.567799341295147	0.969	0.972	6.06272674871627e-17	0	RPL29
TRAM1	2.09173426885934e-21	0.470188551143236	0.815	0.699	6.07502383704817e-17	0	TRAM1
HSD17B7	2.49491679367588e-21	0.449824576758034	0.79	0.58	7.24598684387287e-17	0	HSD17B7
RSL24D1	4.04860020854679e-21	0.66737430275615	0.77	0.62	1.17583495856825e-16	0	RSL24D1
ATP6V1A	4.45845229750319e-21	0.681641740458478	0.881	0.798	1.29486830076385e-16	0	ATP6V1A
DDX3X	6.49946858385044e-21	0.523255689808529	0.969	0.949	1.88764066080768e-16	0	DDX3X
JKAMP	6.7294415775895e-21	0.763689405828616	0.837	0.721	1.95443171737932e-16	0	JKAMP
DPP6	6.76747004241478e-21	0.399724030841846	0.83	0.715	1.96547632441853e-16	0	DPP6
ISOC1	7.11260040080889e-21	0.513348574322139	0.455	0.237	2.06571253440693e-16	0	ISOC1
FFAR1	7.85262046456126e-21	0.263882463411304	0.625	0.408	2.28063656152253e-16	0	FFAR1
FXYD6-FXYD2	7.94344764919617e-21	0.58913250194626	0.885	0.865	2.30701550075604e-16	0	FXYD6-FXYD2
RPL9P9	9.56384049365686e-21	0.415510623390741	0.996	0.993	2.77762619457276e-16	0	RPL9P9
RPS28P7	9.95501712436218e-21	0.640690783763095	0.998	0.984	2.89123562342851e-16	0	RPS28P7
EIF3H	1.0045164264373e-20	0.78355932918407	0.914	0.843	2.91741705730184e-16	0	EIF3H
HERPUD1	1.27550165906294e-20	0.776935774800037	0.876	0.791	3.70443946841649e-16	0	HERPUD1
TIAL1	1.35498803481092e-20	0.588676148541644	0.896	0.863	3.93529174950137e-16	0	TIAL1
LARP1	1.52383462202186e-20	0.388191539629142	0.965	0.941	4.42567289273809e-16	0	LARP1
RPS21	2.00658691761885e-20	0.480424096687989	0.971	0.977	5.82773038484042e-16	0	RPS21
TUBA1A	2.17216836899331e-20	0.571857113664239	0.991	0.975	6.30862859406728e-16	0	TUBA1A
KPNA6	2.26132695931987e-20	0.382805826792369	0.956	0.95	6.5675718879527e-16	0	KPNA6
RPL9P8	2.39106598744898e-20	0.415431648889379	0.996	0.996	6.94437294734808e-16	0	RPL9P8
RPS24	2.76127289611968e-20	0.285482436890471	0.998	0.994	8.0195648722004e-16	0	RPS24
CNRIP1	3.1263992197851e-20	0.307495892324603	0.364	0.162	9.08000125402185e-16	0	CNRIP1
RPLP0	3.78603784954947e-20	0.458676807491909	0.996	0.997	1.09957897264465e-15	0	RPLP0
TUBB2A	4.20724895775911e-20	0.284951725821833	0.36	0.16	1.22191131480198e-15	0	TUBB2A
RTCB	4.75363716118526e-20	0.810196508789677	0.766	0.604	1.38059884072304e-15	0	RTCB
FAM162A	5.08396234821366e-20	0.698761934236129	0.781	0.646	1.47653518479169e-15	0	FAM162A
TRNQ	5.29452190506398e-20	0.642141884826041	0.991	0.987	1.53768799688773e-15	0	TRNQ
AP3B1	5.4153977399081e-20	0.466741458100891	0.806	0.634	1.57279396560151e-15	0	AP3B1
TMEM209	6.47871916715171e-20	0.741678884637142	0.748	0.647	1.88161440771587e-15	0	TMEM209
RPS17	8.34297481166363e-20	0.439902708917381	0.969	0.962	2.42305017455147e-15	0	RPS17
UBXN4	9.09578872496522e-20	0.493138101067477	0.976	0.975	2.64168991939165e-15	0	UBXN4
YWHAG	9.38269667097517e-20	0.343381483585041	0.892	0.786	2.72501659415132e-15	0	YWHAG
C7orf73	9.84361930030228e-20	0.541072437677044	0.901	0.848	2.85888235338679e-15	0	C7orf73
RMND5A	1.36289086315753e-19	0.430079303095389	0.735	0.576	3.95824393386841e-15	0	RMND5A
SPP1	1.49974698200576e-19	2.49374178175939	0.457	0.274	4.35571515983931e-15	0	SPP1
TCEB2	1.86367503012487e-19	0.389790225979239	0.996	0.987	5.41267138999166e-15	0	TCEB2
PON2	1.93226457605493e-19	0.803846437462115	0.693	0.526	5.61187600823633e-15	0	PON2
SSR3	2.26703046809384e-19	0.454369952364792	0.958	0.921	6.58413658848495e-15	0	SSR3
WARS	2.28281104691707e-19	0.655779953546036	0.581	0.396	6.62996812356124e-15	0	WARS
MRPL33	2.96088185902166e-19	0.524402598151807	0.954	0.91	8.5992891831566e-15	0	MRPL33
LYRM7	2.96445555020166e-19	0.353931359805999	0.698	0.545	8.60966825445069e-15	0	LYRM7
MT1X	3.40060935989264e-19	0.865725066903945	0.852	0.706	9.87638976393619e-15	0	MT1X
PTPRN	5.11816330959844e-19	0.551557415525342	0.996	0.998	1.48646817000668e-14	0	PTPRN
CCDC28A	5.1209012028382e-19	0.412053696608099	0.556	0.343	1.4872633363403e-14	0	CCDC28A
SRSF6	5.22023518039293e-19	0.577963197277095	0.993	0.991	1.51611290344152e-14	0	SRSF6
ENDOD1	5.54595768974812e-19	0.293219551720638	0.472	0.269	1.61071249183355e-14	0	ENDOD1
SKIL	5.58267664754291e-19	0.526326905169663	0.868	0.781	1.62137677874589e-14	0	SKIL
STXBP1	6.67389722693515e-19	0.519453618267604	0.927	0.876	1.93829997161878e-14	0	STXBP1
NUCKS1	6.73885512215364e-19	0.273410305922378	0.987	0.993	1.95716569312708e-14	0	NUCKS1
RBBP4	1.15638738276549e-18	0.343249688229341	0.978	0.931	3.35849587576581e-14	0	RBBP4
C4orf3	1.42367734768532e-18	0.529902680931176	0.872	0.816	4.13478612088246e-14	0	C4orf3
MPHOSPH8	1.47694939611646e-18	0.265188080838944	0.947	0.9	4.28950413114103e-14	0	MPHOSPH8
CFL2	1.69924427980296e-18	0.583314021119598	0.578	0.397	4.93511516183173e-14	0	CFL2
CTNNB1	1.87650193727198e-18	0.402032484082501	1	0.999	5.44992457641901e-14	0	CTNNB1
COMMD6	2.74601115906e-18	0.352944057449803	0.927	0.9	7.97524020925794e-14	0	COMMD6
SNX27	3.18700909032208e-18	0.436271000610782	0.744	0.592	9.25603050102241e-14	0	SNX27
NDUFB9	3.23498303664294e-18	0.46754823712314	0.938	0.943	9.39536123332209e-14	0	NDUFB9
PSMD11	3.29662010592553e-18	0.439204506400189	0.885	0.826	9.57437377363951e-14	0	PSMD11
NUDT3	3.39546471476562e-18	0.519135353995982	0.775	0.671	9.86144817109379e-14	0	NUDT3
CCPG1	3.61792995243256e-18	0.30142619477072	0.863	0.785	1.05075539608499e-13	0	CCPG1
PCM1	4.89047147980266e-18	0.285853454769817	0.947	0.934	1.42033963187909e-13	0	PCM1
AEBP2	5.3748281537528e-18	0.614662214527608	0.81	0.718	1.56101134069443e-13	0	AEBP2
SLIRP	5.41914531761967e-18	0.41302481754466	0.978	0.958	1.57388237459628e-13	0	SLIRP
RBP1	9.53335285500069e-18	0.462018347268291	0.753	0.627	2.76877166967785e-13	0	RBP1
HMGB1	1.11745598396805e-17	0.379575731882859	0.998	0.995	3.24542741423842e-13	0	HMGB1
SF3B5	1.12052431860075e-17	0.616551367698366	0.903	0.824	3.25433877851214e-13	0	SF3B5
KTN1	1.13077650524573e-17	0.398082816295936	0.954	0.921	3.28411420418518e-13	0	KTN1
MAPRE2	1.20426317248135e-17	0.320496835107671	0.868	0.745	3.49754153183758e-13	0	MAPRE2
TRNK	1.41862261500765e-17	0.342845777344734	0.6	0.406	4.12010566076671e-13	0	TRNK
PABPC1	1.48039387478799e-17	0.456350123294141	0.998	0.996	4.29950793054676e-13	0	PABPC1
PTPLAD1	1.85078364210257e-17	0.638579790559457	0.916	0.894	5.3752309317585e-13	0	PTPLAD1
PAX6	2.33726825056633e-17	0.350593223403099	0.991	0.986	6.78812818011978e-13	0	PAX6
ZFP36L2	2.35237450850498e-17	0.366456785652111	0.49	0.296	6.83200128505101e-13	0	ZFP36L2
N4BP2L2	2.4611575404631e-17	0.368438088898634	0.954	0.932	7.14793984476699e-13	0	N4BP2L2
ACTB	2.74502498481422e-17	0.386682662981385	1	1	7.97237606339594e-13	0	ACTB
RPS17L	2.96811694701387e-17	0.387692335956143	0.971	0.97	8.62030204921239e-13	0	RPS17L
PDE8B	3.20327421988784e-17	0.264913784060526	0.634	0.468	9.30326931682026e-13	0	PDE8B
SEPT7	3.23824814798535e-17	0.387645395565407	0.965	0.952	9.40484409619386e-13	0	SEPT7
OCIAD1	3.53410163904295e-17	0.550968843737985	0.932	0.885	1.02640913902724e-12	0	OCIAD1
IDS	3.97737740697507e-17	0.441948818803766	0.978	0.973	1.15514972030777e-12	0	IDS
DAAM1	4.70992709676887e-17	0.533845883577191	0.905	0.875	1.36790412671458e-12	0	DAAM1
GLG1	5.65355614376626e-17	0.410369671107209	0.947	0.934	1.64196231083403e-12	0	GLG1
ARPC4	5.83195797917701e-17	0.353362334809624	0.976	0.96	1.69377555589238e-12	0	ARPC4
SHOC2	6.16372991079561e-17	0.368416319433313	0.837	0.723	1.79013207799237e-12	0	SHOC2
TNKS2	7.72208965870888e-17	0.275086347059146	0.759	0.619	2.24272649957882e-12	0	TNKS2
NCOA3	8.78201079536116e-17	0.258475048271569	0.671	0.533	2.55055939529674e-12	0	NCOA3
PNPO	8.85218993439915e-17	0.610330116968601	0.834	0.732	2.57094152264755e-12	0	PNPO
GAPDH	1.12986360781502e-16	0.389873105423048	0.998	0.997	3.28146287617716e-12	0	GAPDH
TMED2	1.36123044325294e-16	0.536179518414027	0.996	0.966	3.95342157633951e-12	0	TMED2
SAR1A	1.51792067256213e-16	0.644093004223874	0.943	0.931	4.40849700932218e-12	0	SAR1A
MORF4L2	1.53486933483163e-16	0.564146401066331	0.965	0.945	4.4577210091515e-12	0	MORF4L2
RQCD1	1.61032921382902e-16	0.515332843684116	0.925	0.893	4.67687913572363e-12	0	RQCD1
TVP23B	1.67710941123317e-16	0.637012124303828	0.883	0.828	4.87082886304449e-12	0	TVP23B
MIF	1.77460732820092e-16	0.515798889214912	1	0.994	5.15399206329394e-12	0	MIF
RPL39	1.95852488933927e-16	0.434149421602985	0.991	0.983	5.68814383610805e-12	0	RPL39
RC3H1	2.03903818260015e-16	0.253594288085706	0.706	0.563	5.92197859372562e-12	0	RC3H1
SSR1	2.59229563414273e-16	0.413070163805956	0.98	0.985	7.52880421024074e-12	0	SSR1
KIAA1598	3.06788573281536e-16	0.263380641674096	0.89	0.817	8.91006053381564e-12	0	KIAA1598
TAX1BP1	3.56991963376423e-16	0.449840655722188	0.967	0.944	1.03681175923414e-11	0	TAX1BP1
RPS8	4.31666359371024e-16	0.38883519593972	0.993	1	1.25368860752126e-11	0	RPS8
NMRK1	4.53188222298942e-16	0.526263960860664	0.603	0.403	1.31619455402282e-11	0	NMRK1
SMU1	4.60858195448053e-16	0.349106599901403	0.874	0.835	1.33847045703978e-11	0	SMU1
LMO1	5.09169397328962e-16	0.480393345544321	0.611	0.437	1.4787806806625e-11	0	LMO1
NIPAL3	5.55697748914781e-16	0.305552813078045	0.583	0.418	1.6139129721732e-11	0	NIPAL3
TOMM20	5.89412852763254e-16	0.339579039112747	0.843	0.752	1.71183174828032e-11	0	TOMM20
RPS7	6.4804413548665e-16	0.43295800227717	0.982	0.984	1.88211458269388e-11	0	RPS7
ADAM17	7.68968838888008e-16	0.309146195388848	0.863	0.78	2.23331619878244e-11	0	ADAM17
PSMA1	8.30885719372844e-16	0.620337338816932	0.876	0.814	2.41314139477455e-11	0	PSMA1
SBDS	8.40217590849396e-16	0.581440887922671	0.903	0.865	2.4402439491039e-11	0	SBDS
MTDH	8.6080879583404e-16	0.293193006729299	0.832	0.762	2.5000469857408e-11	0	MTDH
AACS	1.01172567731977e-15	0.375983059308077	0.62	0.443	2.9383548846398e-11	0	AACS
PSMB1	1.14334218926738e-15	0.599407089353444	0.925	0.906	3.32060872028924e-11	0	PSMB1
SLC39A9	1.31978910418881e-15	0.674093386186136	0.854	0.805	3.83306349529555e-11	0	SLC39A9
CCT8	1.49130855575335e-15	0.584231389668838	0.898	0.824	4.33120743847447e-11	0	CCT8
KLHL28	1.60005506588533e-15	0.394392312027857	0.576	0.413	4.64703992785075e-11	0	KLHL28
TAF9	1.66445849345091e-15	0.464120563731586	0.89	0.833	4.83408680252947e-11	0	TAF9
TMX1	1.77702100898994e-15	0.449243938935208	0.872	0.819	5.1610021164095e-11	0	TMX1
USP2	1.85939105120308e-15	0.397290581721787	0.817	0.746	5.4002294300091e-11	0	USP2
GABARAP	2.16477715253583e-15	0.381793228345985	1	0.997	6.28716228410982e-11	0	GABARAP
FBXO7	2.23187462915761e-15	0.56125091130003	0.766	0.665	6.48203348546245e-11	0	FBXO7
EIF3L	2.28848194552081e-15	0.686783968386315	0.894	0.825	6.6464381143761e-11	0	EIF3L
RWDD2B	2.60794763418929e-15	0.793821127131606	0.589	0.447	7.57426231397596e-11	0	RWDD2B
CRBN	2.90366811979115e-15	0.660547278056876	0.698	0.604	8.43312332030944e-11	0	CRBN
YWHAQ	3.11833261442469e-15	0.503459466969874	0.982	0.934	9.05657341207362e-11	0	YWHAQ
RAB21	4.01621709135562e-15	0.666396391166843	0.832	0.762	1.16642992984241e-10	0	RAB21
RAP1GAP2	4.46301448085372e-15	0.333017798500973	0.89	0.838	1.29619329567435e-10	0	RAP1GAP2
ELMO2	4.6715421124348e-15	0.330779502034818	0.512	0.332	1.35675597571444e-10	0	ELMO2
TMTC3	4.75257164789453e-15	0.349244725483579	0.656	0.492	1.38028938369801e-10	0	TMTC3
STAT2	5.0074350855573e-15	0.314577181776068	0.863	0.81	1.45430937189841e-10	0	STAT2
CCDC53	5.08281275545663e-15	0.639828002848939	0.786	0.668	1.47620130856727e-10	0	CCDC53
TXNL1	5.19896432054238e-15	0.570511694905345	0.757	0.632	1.50993520761512e-10	0	TXNL1
TOX4	5.25338379661928e-15	0.64883909572691	0.773	0.696	1.52574025605214e-10	0	TOX4
COX20	5.9874173049171e-15	0.261732606576381	0.751	0.604	1.73892560786707e-10	0	COX20
SEC63	6.22371125381327e-15	0.415237584074956	0.839	0.8	1.80755245944499e-10	0	SEC63
FBXO3	6.54873323377892e-15	0.527678466908437	0.596	0.429	1.90194859308641e-10	0	FBXO3
TTC37	7.39822316425218e-15	0.453646554722023	0.909	0.893	2.14866595359376e-10	0	TTC37
BEX2	8.141315065471e-15	0.542545606456075	0.945	0.943	2.36448213446474e-10	0	BEX2
CCDC104	8.28865107068287e-15	0.461333846936233	0.786	0.717	2.40727293045843e-10	0	CCDC104
R3HDM2	8.45517284551923e-15	0.304844308967601	0.965	0.947	2.45563584952415e-10	0	R3HDM2
LACTB2	9.12206423269079e-15	0.365883666483553	0.53	0.343	2.64932111510039e-10	0	LACTB2
PSMD1	9.22864121919046e-15	0.499326358804559	0.826	0.768	2.68027426928949e-10	0	PSMD1
HECA	1.06569631960297e-14	0.381269696687969	0.333	0.169	3.0951018210229e-10	0	HECA
GOLGA4	1.11695945362392e-14	0.291004101348126	0.978	0.967	3.24398534115996e-10	0	GOLGA4
PAIP2	1.31929031043307e-14	0.437402859201215	0.874	0.81	3.83161484859076e-10	0	PAIP2
VAT1	1.36368106582211e-14	0.404547001392229	0.843	0.763	3.96053891946715e-10	0	VAT1
NDUFB7	1.56012959422498e-14	0.421506622834872	0.876	0.805	4.53108438050761e-10	0	NDUFB7
YIPF5	1.60965992251667e-14	0.373071468525552	0.757	0.628	4.67493531296517e-10	0	YIPF5
SH3BGRL	1.72367170824394e-14	0.573938774306824	0.819	0.751	5.00605974225289e-10	0	SH3BGRL
BAG3	1.76578697606969e-14	0.257647707345288	0.36	0.194	5.1283751145992e-10	0	BAG3
FTO	1.88588824812869e-14	0.353070993664221	0.817	0.739	5.47718523904015e-10	0	FTO
KRT222	1.93686891196671e-14	0.3432262825298	0.338	0.169	5.62524838102492e-10	0	KRT222
ANKMY2	2.0750581337852e-14	0.321693863888636	0.408	0.231	6.02659133795234e-10	0	ANKMY2
TMEM41B	2.10412151957361e-14	0.560568368589865	0.711	0.608	6.11100012929763e-10	0	TMEM41B
RPL21	2.67627757288346e-14	0.745348996713553	1	0.998	7.77271295492544e-10	0	RPL21
RPL7P	2.7261817195253e-14	0.39257795563023	0.996	0.987	7.91764956801733e-10	0	RPL7P
EEF1B2	2.87705667869463e-14	0.51397596693175	0.947	0.914	8.3558357119328e-10	0	EEF1B2
PSMA2	2.96369812724821e-14	0.624131176443544	0.874	0.843	8.60746847096696e-10	0	PSMA2
ARL16	3.47773235335074e-14	0.28402283940657	0.499	0.305	1.01003780738366e-09	0	ARL16
SLC38A2	3.49231553453887e-14	0.55316459157024	0.77	0.684	1.01427320069613e-09	0	SLC38A2
ACLY	3.50676474885514e-14	0.510169976827758	0.951	0.943	1.01846968601e-09	0	ACLY
PSMC1	4.22285868765261e-14	0.618533278194921	0.83	0.731	1.22644484865495e-09	0	PSMC1
UBE2B	4.85957125311663e-14	0.517924720405541	0.921	0.895	1.41136527904266e-09	0	UBE2B
RAP1GDS1	5.11249551313872e-14	0.433436766108604	0.768	0.657	1.48482207188088e-09	0	RAP1GDS1
TMEM59	6.24891867574473e-14	0.37394019876704	0.989	0.995	1.81487345099654e-09	0	TMEM59
BHLHB9	6.78016708867492e-14	0.259302980832837	0.49	0.329	1.96916392756386e-09	0	BHLHB9
GDAP1	6.99165612332517e-14	0.475290511387227	0.706	0.566	2.03058668789733e-09	0	GDAP1
ANXA5	7.24293654256709e-14	0.622967411999821	0.962	0.943	2.10356606005776e-09	0	ANXA5
DSTN	7.47139934378964e-14	0.438510783285141	0.991	0.994	2.16991851141683e-09	0	DSTN
PSMC5	8.38964561568988e-14	0.578559975046613	0.834	0.787	2.43660477616481e-09	0	PSMC5
AHCYL1	8.57223634544576e-14	0.414792481279262	0.909	0.864	2.48963460180781e-09	0	AHCYL1
TMEM167A	8.80981918634425e-14	0.427515057568562	0.861	0.8	2.55863578628996e-09	0	TMEM167A
CLGN	8.93798502526735e-14	0.564950455432797	0.664	0.558	2.5958589908884e-09	0	CLGN
ARID2	9.54662861899614e-14	0.310378494011416	0.799	0.698	2.77262734981505e-09	0	ARID2
CBR1	9.97799350700719e-14	0.294236097756455	0.419	0.242	2.8979086542401e-09	0	CBR1
MAP3K2	1.0272948152314e-13	0.267238157093976	0.839	0.762	2.98357233187657e-09	0	MAP3K2
ATP5G2	1.03151852783226e-13	0.345098092243599	0.991	0.988	2.99583926038324e-09	0	ATP5G2
RPS10P19	1.1064274196432e-13	0.360317033502741	0.958	0.924	3.21339715486975e-09	0	RPS10P19
EDEM1	1.16872377143853e-13	0.471359098065281	0.72	0.608	3.39432444938893e-09	0	EDEM1
SRXN1	1.23941874686608e-13	0.318763321840187	0.426	0.257	3.59964386652317e-09	0	SRXN1
XPOT	1.3120491061166e-13	0.270424912349071	0.464	0.289	3.81058421889445e-09	0	XPOT
CDC42	1.40681881517641e-13	0.367780678138102	0.989	0.991	4.08582388491683e-09	0	CDC42
LPIN3	1.45947865974756e-13	0.319292422842674	0.355	0.191	4.23876387150484e-09	0	LPIN3
EMC2	1.49767831769861e-13	0.65594770194418	0.753	0.62	4.34970713809206e-09	0	EMC2
CBFB	1.6487349440476e-13	0.634859797022163	0.673	0.55	4.78842089799745e-09	0	CBFB
MIER1	1.66880038752317e-13	0.379984211738478	0.914	0.908	4.84669696548353e-09	0	MIER1
SKA2	1.81317387529302e-13	0.406498481409924	0.68	0.558	5.26600088601352e-09	0	SKA2
SPCS3	2.19279977925231e-13	0.485777765161363	0.766	0.688	6.36854839888249e-09	0	SPCS3
STAT3	2.22109484778642e-13	0.334913494111867	0.971	0.953	6.4507257664261e-09	0	STAT3
LAPTM4A	2.31704385058106e-13	0.482936048801516	0.936	0.945	6.72939045524257e-09	0	LAPTM4A
NSA2	2.4481084178481e-13	0.518332365233521	0.859	0.768	7.11004127795624e-09	0	NSA2
EIF5A2	2.51398820453624e-13	0.308781220074043	0.424	0.254	7.30137594243461e-09	0	EIF5A2
NDUFV2	2.68012366231366e-13	0.473773612863441	0.956	0.942	7.78388315245755e-09	0	NDUFV2
DNAJA1	2.88958997048886e-13	0.638851756476496	0.956	0.95	8.3922361512908e-09	0	DNAJA1
SLC25A6	2.89603924666339e-13	0.395417840459812	0.945	0.902	8.41096678408448e-09	0	SLC25A6
ZNF32	3.24880471749909e-13	0.453294331710639	0.486	0.31	9.43550354103262e-09	0	ZNF32
TMEM123	3.32858451423167e-13	0.331484263320416	0.689	0.555	9.66720800468303e-09	0	TMEM123
CHORDC1	3.42306401055396e-13	0.300625942503188	0.691	0.549	9.94160480585188e-09	0	CHORDC1
TSTD1	3.43529974225495e-13	0.445179707143449	0.894	0.835	9.97714104143105e-09	0	TSTD1
ABCA5	3.51678562245442e-13	0.276011188749864	0.923	0.871	1.02138004832944e-08	0	ABCA5
ANKRD10	3.71218044745114e-13	0.46425292613683	0.872	0.83	1.07812856735323e-08	0	ANKRD10
AGO1	3.7887191483782e-13	0.274588282999437	0.603	0.475	1.10035770226348e-08	0	AGO1
TANGO2	3.79139871325658e-13	0.253273354561984	0.45	0.28	1.10113592829111e-08	0	TANGO2
ZNF483	3.81938428532314e-13	0.25012989730635	0.667	0.563	1.1092637779864e-08	0	ZNF483
ARF6	4.03344417577622e-13	0.719629006948888	0.921	0.884	1.17143319197069e-08	0	ARF6
TULP4	4.43591967283827e-13	0.316300262943795	0.901	0.898	1.28832415058242e-08	0	TULP4
RIN2	4.49992181570611e-13	0.504512820051652	0.993	0.977	1.30691229293552e-08	0	RIN2
HINT1	4.71941426668252e-13	0.34161564509119	0.996	0.993	1.37065948547261e-08	0	HINT1
RPS23P8	5.90719396586814e-13	0.256569921390775	0.991	0.978	1.71562634350708e-08	0	RPS23P8
COX7C	6.14869170815071e-13	0.346847768608843	0.991	0.99	1.78576453279821e-08	0	COX7C
CLINT1	6.39994988077498e-13	0.269061840739069	0.868	0.771	1.85873744387348e-08	0	CLINT1
CBX6	7.77156919753946e-13	0.286276209212024	0.991	0.997	2.25709684204138e-08	0	CBX6
SENP5	7.78007161369709e-13	0.446909362365124	0.746	0.675	2.25956619876605e-08	0	SENP5
HNRNPA1	8.22239676529828e-13	0.428179367175825	0.96	0.959	2.38803069254558e-08	0	HNRNPA1
TUBA1C	8.22331872521125e-13	0.433346425029292	0.938	0.932	2.3882984573631e-08	0	TUBA1C
ADH5	8.56332612634173e-13	0.443092582744446	0.634	0.472	2.48704680687343e-08	0	ADH5
C1orf43	8.6159676175627e-13	0.508032808673745	0.845	0.765	2.50233547516874e-08	0	C1orf43
NDUFA12	8.78459260745874e-13	0.556811091538765	0.923	0.869	2.55130923098424e-08	0	NDUFA12
RPS5	1.02880544277543e-12	0.490230545725915	0.967	0.967	2.98795964745267e-08	0	RPS5
ASAH1	1.05562239787297e-12	0.519866754123983	0.945	0.915	3.06584413014245e-08	0	ASAH1
CTTN	1.12213958732025e-12	0.447510328090308	0.943	0.929	3.25903000345419e-08	0	CTTN
PCBP2	1.13616834126495e-12	0.405828689562495	1	0.996	3.2997737135358e-08	0	PCBP2
KIF5A	1.18790695026127e-12	0.339734708965122	0.693	0.606	3.45003815564381e-08	0	KIF5A
SLC4A10	1.22720719215605e-12	0.347064753918059	0.678	0.564	3.56417784817881e-08	0	SLC4A10
COX7A2L	1.43123099843954e-12	0.430865457257757	0.947	0.932	4.15672418876796e-08	0	COX7A2L
SURF2	1.50783939701554e-12	0.364041284316272	0.506	0.338	4.37921796075222e-08	0	SURF2
KIF21A	1.53577380836382e-12	0.270910973025714	0.881	0.849	4.46034787163104e-08	0	KIF21A
EIF3M	1.54578705873383e-12	0.640058531614413	0.742	0.651	4.48942935468065e-08	0	EIF3M
ACTG1	1.63453063329455e-12	0.263293287149957	0.996	0.99	4.74716731827735e-08	0	ACTG1
RPL9P7	1.96096149641199e-12	0.331929155483261	0.985	0.974	5.69522047402933e-08	0	RPL9P7
PSMB7	2.09200815873696e-12	0.640357620812419	0.755	0.678	6.07581929541974e-08	0	PSMB7
METTL7A	2.11192471020763e-12	0.256656557137175	0.461	0.301	6.13366293585601e-08	0	METTL7A
H2AFZ	2.13889472533557e-12	0.479723869285937	0.94	0.943	6.21199195079208e-08	0	H2AFZ
RAB18	2.30583188039857e-12	0.411002034678254	0.901	0.835	6.69682753024157e-08	0	RAB18
GDI2	2.52165853316604e-12	0.598592542555994	0.901	0.884	7.32365287787413e-08	0	GDI2
DARS	2.54569187141445e-12	0.609794652997295	0.74	0.686	7.393452902149e-08	0	DARS
HSPD1	2.70928980221046e-12	0.562526543346395	0.934	0.936	7.86859037255983e-08	0	HSPD1
BTBD3	2.94263766212823e-12	0.345268827220119	0.755	0.648	8.54630256211901e-08	0	BTBD3
PCNP	2.98635816637153e-12	0.527453011154177	0.916	0.903	8.67328002259285e-08	0	PCNP
FKBP9	3.14894052217749e-12	0.454074862699159	0.892	0.892	9.14546795856009e-08	0	FKBP9
ATP5O	3.39089175595498e-12	0.531756666963775	0.921	0.909	9.84816692682005e-08	0	ATP5O
SUMO1	3.47045174014871e-12	0.470511094459304	0.929	0.909	1.00792329889139e-07	0	SUMO1
DNAJA2	3.47227522667377e-12	0.504500246170266	0.872	0.819	1.00845289408286e-07	0	DNAJA2
LOC101928293	3.71468115028829e-12	0.321579066514682	0.656	0.545	1.07885484647823e-07	0	LOC101928293
HSPB11	4.04028921802354e-12	0.496168317674528	0.726	0.614	1.17342119759058e-07	0	HSPB11
DDX24	4.12163999452248e-12	0.320213664716872	0.98	0.964	1.19704790360916e-07	0	DDX24
ADAR	4.14071787119588e-12	0.337131234892821	0.896	0.872	1.20258869133142e-07	0	ADAR
AZI2	4.59529177450029e-12	0.345054098549859	0.687	0.564	1.33461059006812e-07	0	AZI2
ALDOC	4.74643090821513e-12	0.437303261766159	0.419	0.257	1.37850592867292e-07	0	ALDOC
ASNS	4.98353920333643e-12	0.620347236974411	0.698	0.613	1.447369290825e-07	0	ASNS
TMEM245	5.45041961063046e-12	0.335468700595135	0.83	0.75	1.58296536751541e-07	0	TMEM245
EMC4	5.45395100738171e-12	0.520135921407293	0.868	0.812	1.58399099107387e-07	0	EMC4
PGGT1B	5.89227388973627e-12	0.288472032172978	0.695	0.564	1.71129310579611e-07	0	PGGT1B
NDUFC2	5.96942876041894e-12	0.279899097626618	0.96	0.961	1.73370119488847e-07	0	NDUFC2
NEIL2	6.06115859646661e-12	0.328802797506829	0.565	0.428	1.7603422911718e-07	0	NEIL2
C1D	6.2078745471748e-12	0.5526907799643	0.784	0.736	1.80295300473598e-07	0	C1D
BTF3L4	6.46499433525456e-12	0.347116354427872	0.826	0.759	1.87762830478798e-07	0	BTF3L4
SUPT16H	8.40142474861608e-12	0.354315572109556	0.801	0.72	2.44002578974057e-07	0	SUPT16H
VOPP1	1.0154343717198e-11	0.367911177916948	0.706	0.63	2.9491260457858e-07	0	VOPP1
MATR3	1.03863628711411e-11	0.351155966148942	0.96	0.963	3.0165113686655e-07	0	MATR3
LYPLAL1	1.0788995122282e-11	0.375674174602948	0.66	0.514	3.13344785336437e-07	0	LYPLAL1
TGFBR1	1.13465646324899e-11	0.272427238022262	0.382	0.235	3.29538276621404e-07	0	TGFBR1
TSPYL5	1.25854889795248e-11	0.414588783154479	0.631	0.542	3.65520356432338e-07	0	TSPYL5
IER3	1.41402929890019e-11	0.295655982022043	0.477	0.331	4.10676529279582e-07	0	IER3
EIF2A	1.43239163206265e-11	0.282837406248226	0.7	0.568	4.16009501699955e-07	0	EIF2A
ATP5A1	1.44150784338952e-11	0.433505769053262	0.956	0.96	4.18657122955619e-07	0	ATP5A1
MTHFD2	1.51143483193514e-11	0.691850896233692	0.426	0.281	4.38966018238924e-07	0	MTHFD2
SRP9	1.58314395293406e-11	0.442670220198721	0.985	0.971	4.59792498250639e-07	0	SRP9
PPA1	1.59577152104754e-11	0.496429266396278	0.951	0.939	4.63459922857838e-07	0	PPA1
TMED4	1.7257275763913e-11	0.396310581652512	0.996	0.996	5.01203060011327e-07	0	TMED4
EDEM3	1.85112827774544e-11	0.383133897605731	0.792	0.74	5.37623185705609e-07	0	EDEM3
PAIP2B	1.97258350524802e-11	0.290604124074733	0.351	0.204	5.72897427429181e-07	0	PAIP2B
IQGAP1	2.03975490006486e-11	0.292898910899948	0.879	0.861	5.92406015625836e-07	0	IQGAP1
SEL1L	2.088967400529e-11	0.353906411738413	0.819	0.767	6.06698802135638e-07	0	SEL1L
HSPA13	2.15107645950723e-11	0.411976947406778	0.675	0.551	6.24737136134685e-07	0	HSPA13
PNMA2	2.39682377489631e-11	0.378060941292126	0.801	0.725	6.96109528943135e-07	0	PNMA2
TGOLN2	2.57086185863431e-11	0.29209056791513	0.967	0.959	7.46655409603162e-07	0	TGOLN2
CBX5	2.63052286391439e-11	0.378308359920597	0.929	0.932	7.63982755366657e-07	0	CBX5
SLC30A7	2.77089878360308e-11	0.386488203648615	0.748	0.682	8.04752133721843e-07	0	SLC30A7
GHITM	3.15743121298278e-11	0.481137550126596	0.914	0.897	9.17012747186588e-07	0	GHITM
RBM39	3.19516363576385e-11	0.393285994941504	0.976	0.967	9.27971374734894e-07	0	RBM39
EIF3A	3.30705356759698e-11	0.314678240248109	0.927	0.922	9.60467567637192e-07	0	EIF3A
PTBP3	3.37132822708701e-11	0.26655693328973	0.826	0.768	9.7913485699288e-07	0	PTBP3
APOBEC2	3.44585670528258e-11	0.430121625904396	0.296	0.154	1.00078016291522e-06	0	APOBEC2
VAPA	3.50102144971418e-11	0.315270158337158	0.947	0.938	1.01680165964049e-06	0	VAPA
NUCB2	3.69036469031184e-11	0.27047458201843	0.969	0.974	1.07179261700727e-06	0	NUCB2
RPS9	3.83527574087563e-11	0.401844664471672	0.852	0.782	1.11387913342251e-06	0	RPS9
TMEM126B	3.95927768246995e-11	0.590373351979847	0.768	0.698	1.14989301731975e-06	0	TMEM126B
TMED10	4.14772030575763e-11	0.348629743503982	0.965	0.962	1.20462240840119e-06	0	TMED10
GABARAPL2	4.29661218592289e-11	0.418734084639448	0.958	0.971	1.24786507715759e-06	0	GABARAPL2
SEC31A	4.34525293811312e-11	0.412888271611289	0.96	0.952	1.26199181081619e-06	0	SEC31A
RABGAP1L	4.55844083700855e-11	0.264437800230481	0.815	0.747	1.32390797229239e-06	0	RABGAP1L
BHLHE40	4.64914939718858e-11	0.259526957929622	0.62	0.511	1.35025245942548e-06	0	BHLHE40
FOXN2	4.78209886676314e-11	0.253874862102274	0.673	0.58	1.38886497387402e-06	0	FOXN2
TMEM14C	5.11155954392139e-11	0.41215313745532	0.837	0.791	1.48455023834109e-06	0	TMEM14C
NAP1L4	5.51122014493148e-11	0.265355714887594	0.828	0.765	1.60062366669245e-06	0	NAP1L4
CAPZA1	5.91248263372589e-11	0.390926094838421	0.991	0.982	1.71716233131301e-06	0	CAPZA1
BFAR	7.96991741350207e-11	0.289316615355086	0.603	0.44	2.31470311440341e-06	0	BFAR
DNAJC7	8.04297378358149e-11	0.370992860494051	0.638	0.516	2.33592087596557e-06	0	DNAJC7
TMEM181	8.07224083373001e-11	0.312764994952373	0.711	0.594	2.34442090534021e-06	0	TMEM181
OXR1	8.65280436521625e-11	0.25180160299012	0.499	0.351	2.51303397178976e-06	0	OXR1
EIF1AD	8.75627539968385e-11	0.43310434171773	0.669	0.582	2.54308506433018e-06	0	EIF1AD
ZNF518B	8.81716774296334e-11	0.283478849889615	0.481	0.341	2.56077002758884e-06	0	ZNF518B
EIF1B	8.9620722268557e-11	0.560708487212737	0.845	0.858	2.6028546368457e-06	0	EIF1B
WTAP	1.03179298543133e-10	0.333259457058846	0.98	0.972	2.9966363675882e-06	0	WTAP
COX5B	1.041876028372e-10	0.354330119281532	0.982	0.961	3.0259205492008e-06	0	COX5B
CNOT7	1.09860463116589e-10	0.367899833478985	0.865	0.81	3.19067743029508e-06	0	CNOT7
TMCO1	1.09930901196104e-10	0.283110771437617	0.916	0.892	3.19272316343844e-06	0	TMCO1
RAB3B	1.12135189664815e-10	0.313654979765772	0.987	0.988	3.25674231343522e-06	0	RAB3B
CHD4	1.17267439193067e-10	0.260344117373206	0.834	0.795	3.40579823648424e-06	0	CHD4
ALG11	1.25064314699438e-10	0.272957431262622	0.594	0.448	3.63224289181579e-06	0	ALG11
TTC1	1.27269561157178e-10	0.449364359419972	0.713	0.633	3.69628986468792e-06	0	TTC1
ZCRB1	1.2766210367674e-10	0.33401265004178	0.815	0.751	3.70769047708356e-06	0	ZCRB1
MEIS1	1.38846327241602e-10	0.530120141210719	0.74	0.655	4.03251388207784e-06	0	MEIS1
OLA1	1.46956756610879e-10	0.261284685752756	0.678	0.572	4.26806508224976e-06	0	OLA1
EID1	1.56130861682138e-10	0.383134639570669	0.945	0.945	4.53450861583434e-06	0	EID1
OSTC	1.57662575302789e-10	0.551180833868478	0.859	0.826	4.57899417451889e-06	0	OSTC
BAG4	1.6156527371146e-10	0.534339864492165	0.6	0.493	4.69234024440194e-06	0	BAG4
SRP14	1.69645018690569e-10	0.315828462053636	0.998	0.995	4.92700027783021e-06	0	SRP14
C4orf27	1.73113781590232e-10	0.377000161582354	0.611	0.462	5.02774355872511e-06	0	C4orf27
RPL7P9	1.74951080520415e-10	0.434354379664766	0.996	0.988	5.0811042315544e-06	0	RPL7P9
STAG2	1.81881805100293e-10	0.288395440595736	0.83	0.8	5.28239326552782e-06	0	STAG2
KLHL42	1.96596836272209e-10	0.361441883529531	0.795	0.728	5.70976191585377e-06	0	KLHL42
PGK1	1.97592294207606e-10	0.477806466779849	0.903	0.872	5.73867300067149e-06	0	PGK1
DDIT3	2.06949760243758e-10	0.808710867396086	0.737	0.649	6.01044188675947e-06	0	DDIT3
SYF2	2.16122224301952e-10	0.341340987376677	0.797	0.711	6.27683776040159e-06	0	SYF2
TARS	2.2443542640187e-10	0.521525712595379	0.826	0.807	6.51827808898951e-06	0	TARS
NCL	2.60911586215692e-10	0.309978160844501	0.958	0.948	7.57765519846235e-06	0	NCL
CASP2	2.67328518684588e-10	0.314081628251249	0.623	0.5	7.76402216815648e-06	0	CASP2
MRPL51	2.70766741343736e-10	0.474354122287368	0.863	0.808	7.86387846884613e-06	0	MRPL51
THYN1	3.01937774538643e-10	0.512918970869486	0.695	0.608	8.7691787859258e-06	0	THYN1
CXXC4	3.19302123518701e-10	0.440718275501535	0.839	0.776	9.27349157335364e-06	0	CXXC4
RTN3	3.20521112324354e-10	0.277081151496553	0.938	0.89	9.30889466523621e-06	0	RTN3
KIAA1467	3.22974220893697e-10	0.39789014621606	0.541	0.41	9.38014029741564e-06	0	KIAA1467
PSMA6	3.29034953779093e-10	0.546036983621263	0.823	0.788	9.5561621626062e-06	0	PSMA6
NOP58	3.52346766546565e-10	0.453211030912002	0.854	0.856	1.02332071408119e-05	0	NOP58
PEPD	3.58888507945505e-10	0.465039166758663	0.611	0.483	1.04231989362613e-05	0	PEPD
TSNAX	3.89434086083918e-10	0.490049394189163	0.77	0.708	1.13103341621352e-05	0	TSNAX
SAT2	4.0092247819779e-10	0.377934694453605	0.669	0.547	1.16439915342984e-05	0	SAT2
ABHD10	4.42555788800662e-10	0.374337156560691	0.587	0.453	1.28531477741376e-05	0	ABHD10
TUBE1	4.77425227603969e-10	0.27518151687626	0.384	0.252	1.38658608853021e-05	0	TUBE1
EIF4G2	4.86500221984727e-10	0.398007708998155	0.974	0.981	1.41294259471024e-05	0	EIF4G2
ATP6V1E1	5.11492004662324e-10	0.49129584422986	0.918	0.904	1.48552622914079e-05	0	ATP6V1E1
CD200	5.59129599200623e-10	0.385348199476105	0.759	0.701	1.62388009495837e-05	0	CD200
MRPS10	5.7226071339868e-10	0.518820980550176	0.671	0.568	1.66201678992379e-05	0	MRPS10
THUMPD1	6.00570061163596e-10	0.415089976625588	0.839	0.833	1.74423562863743e-05	0	THUMPD1
SMIM4	6.22212285796045e-10	0.288864454820318	0.779	0.709	1.80709114163745e-05	0	SMIM4
TMEM144	7.13704283218314e-10	0.310157716196472	0.285	0.164	2.07281134975095e-05	0	TMEM144
NDUFA4	8.40811422169653e-10	0.26023188234378	0.83	0.741	2.44196861340732e-05	0	NDUFA4
MT2A	8.47853322960951e-10	0.353068003224931	0.609	0.447	2.46242040587549e-05	0	MT2A
UBR2	8.50091553547869e-10	0.290943222651803	0.742	0.637	2.46892089896908e-05	0	UBR2
CADPS	9.76976970383482e-10	0.264635829083441	0.954	0.904	2.83743421508475e-05	0	CADPS
SH3BGRL2	1.00093756301982e-09	0.495159764570045	0.682	0.594	2.90702296427846e-05	0	SH3BGRL2
ATP6V1C1	1.03041417596413e-09	0.300250831883841	0.713	0.595	2.99263189125262e-05	0	ATP6V1C1
PSMA3	1.04427967509868e-09	0.588352107198958	0.87	0.837	3.03290146038909e-05	0	PSMA3
PIAS1	1.04811329563816e-09	0.356473842468644	0.87	0.836	3.04403544452189e-05	0	PIAS1
CACYBP	1.06508713243839e-09	0.377070525496446	0.766	0.727	3.09333255874082e-05	0	CACYBP
SQSTM1	1.15734910042464e-09	0.279003223892904	0.945	0.888	3.36128899236329e-05	0	SQSTM1
TUFT1	1.21436552600186e-09	0.333966779105053	0.523	0.398	3.52688179716721e-05	0	TUFT1
REEP5	1.2574687987837e-09	0.32560769616145	0.887	0.866	3.65206663230749e-05	0	REEP5
TSR2	1.29763413144219e-09	0.468604263495913	0.7	0.582	3.76871880794755e-05	0	TSR2
SFMBT1	1.35583868915105e-09	0.263851664266626	0.706	0.613	3.9377623049014e-05	0	SFMBT1
RBM6	1.6528867815336e-09	0.290463607476508	0.916	0.919	4.80047907960803e-05	0	RBM6
CDV3	1.7761087478894e-09	0.497525751796471	0.781	0.733	5.15835263649519e-05	0	CDV3
PPP6R3	1.82417442871465e-09	0.359885503202761	0.909	0.894	5.29794979331595e-05	0	PPP6R3
APOOL	1.85938489115938e-09	0.39459826804966	0.786	0.724	5.40021153939419e-05	0	APOOL
C21orf33	2.09154387343283e-09	0.25014424846302	0.647	0.557	6.07447087161097e-05	0	C21orf33
SCOC	2.09499383340889e-09	0.4790860303459	0.918	0.886	6.08449059036945e-05	0	SCOC
HERPUD2	2.25380559918753e-09	0.358303657439539	0.66	0.564	6.54572760172034e-05	0	HERPUD2
DCUN1D1	2.32871396104058e-09	0.303492953154625	0.773	0.686	6.76328395705016e-05	0	DCUN1D1
SYT4	2.42763258388261e-09	0.40079128441554	0.901	0.868	7.05057331337026e-05	0	SYT4
LMBRD1	2.49479990093216e-09	0.506790360468555	0.907	0.868	7.24564735227728e-05	0	LMBRD1
RPL10A	2.72765162121816e-09	0.34988657427406	0.958	0.965	7.9219186035039e-05	0	RPL10A
ATP6V1B2	2.73353149144143e-09	0.532486601119588	0.861	0.829	7.93899551059334e-05	0	ATP6V1B2
HMGB1P5	2.73457873636878e-09	0.340118640398474	0.987	0.988	7.94203702403586e-05	0	HMGB1P5
OSTF1	2.76978173135204e-09	0.26843511855273	0.618	0.485	8.04427708236572e-05	0	OSTF1
TMEM87A	3.34791308582491e-09	0.381280718620916	0.658	0.58	9.72334397516127e-05	0	TMEM87A
ATP6V1D	3.55223058844174e-09	0.461695707472406	0.903	0.874	0.000103167432980113	0	ATP6V1D
CAPZA2	3.69479264368618e-09	0.487222034159897	0.943	0.934	0.000107307862750578	0	CAPZA2
HOPX	4.04627684164363e-09	0.500397161705391	0.574	0.473	0.000117516018311856	0	HOPX
S100A6	4.09247742490475e-09	0.610190098582176	0.845	0.844	0.000118857821851509	0	S100A6
WDR41	4.34209870508079e-09	0.272755567866932	0.375	0.243	0.000126107572691661	0	WDR41
ZNF286A	4.81424293849314e-09	0.329582012703215	0.45	0.331	0.000139820057662656	0	ZNF286A
EDF1	4.85455399254202e-09	0.342896338940209	0.879	0.854	0.000140990811605398	0	EDF1
RAB22A	4.87681701216679e-09	0.393540114901421	0.748	0.69	0.00014163739648436	0	RAB22A
SRP72	5.32277563801625e-09	0.320893135487076	0.804	0.767	0.000154589372854906	0	SRP72
CYB5R1	5.62382200912377e-09	0.374713059959201	0.426	0.293	0.000163332662610982	0	CYB5R1
CBWD2	5.71655047954086e-09	0.27731024600972	0.976	0.95	0.000166025775577305	0	CBWD2
PSMC6	5.82328969915676e-09	0.541443424718463	0.715	0.651	0.00016912580273261	0	PSMC6
CCT7	6.03401640005759e-09	0.425814622997851	0.863	0.846	0.000175245938306873	0	CCT7
EEF1E1	6.12614009456805e-09	0.450202181841443	0.585	0.478	0.00017792148676654	0	EEF1E1
RPS28	6.51978593491764e-09	0.642096069031782	0.993	0.983	0.000189354142907813	0	RPS28
CCDC90B	6.67425655661643e-09	0.40225982494878	0.614	0.502	0.000193840433173811	0	CCDC90B
ACADM	6.83411586474038e-09	0.366269959754043	0.658	0.571	0.000198483227059655	0	ACADM
TAF7	6.87296302817827e-09	0.472727339568434	0.83	0.821	0.000199611465227382	0	TAF7
RHOBTB3	6.87385096781145e-09	0.323054044129463	0.905	0.879	0.000199637253658148	0	RHOBTB3
OAZ1	7.10981267364468e-09	0.338651274000374	0.974	0.986	0.000206490289480662	0	OAZ1
MPZL3	7.26480487663425e-09	0.384897405122701	0.373	0.249	0.000210991728032089	0	MPZL3
PSMD7	7.46966088698749e-09	0.445347984436896	0.845	0.798	0.000216941361140778	0	PSMD7
AKR1A1	7.5003364636772e-09	0.693076829242104	0.695	0.67	0.000217832271914577	0	AKR1A1
PRPS2	7.60035796822692e-09	0.35234682002395	0.395	0.267	0.000220737196471214	0	PRPS2
ERGIC2	7.67984387615674e-09	0.546535895692421	0.682	0.618	0.00022304570569522	0	ERGIC2
SAP18	7.75600507962464e-09	0.31021031934401	0.962	0.958	0.000225257655527538	0	SAP18
TM2D1	8.56097297960274e-09	0.419554078869597	0.755	0.676	0.000248636338246602	0	TM2D1
PREPL	8.84689040002265e-09	0.267094160051919	0.854	0.796	0.000256940237887858	0	PREPL
EPM2AIP1	9.31522000567635e-09	0.308850667216822	0.817	0.802	0.000270541934624858	0	EPM2AIP1
RPA2	9.66221792647423e-09	0.451498428781798	0.753	0.677	0.000280619795238591	0	RPA2
NR1D2	9.74226083451082e-09	0.289553405132279	0.611	0.503	0.000282944481416698	0	NR1D2
CLDN12	9.96640437819573e-09	0.399564605172241	0.614	0.5	0.000289454282355939	0	CLDN12
RBMX	1.00098165120222e-08	0.378760317311222	0.958	0.93	0.000290715100958661	0	RBMX
TRNY	1.01170803436805e-08	0.535007997186233	0.962	0.96	0.000293830364421514	0	TRNY
TOMM22	1.07241648418435e-08	0.357032862566038	0.848	0.779	0.00031146191950166	0	TOMM22
RWDD1	1.15196222029423e-08	0.349419596822115	0.79	0.741	0.000334564387640054	0	RWDD1
ATL3	1.15322639793098e-08	0.394074133033716	0.691	0.646	0.000334931542751093	0	ATL3
SGCB	1.26794645127446e-08	0.262849624678513	0.777	0.703	0.000368249687843641	0	SGCB
SERINC3	1.27758612908068e-08	0.423097597687219	0.826	0.808	0.000371049339468901	0	SERINC3
UNC50	1.28244658258249e-08	0.432172796520614	0.682	0.598	0.000372460960979433	0	UNC50
VPS29	1.42536919922252e-08	0.466381535124633	0.852	0.815	0.000413969976530197	0	VPS29
PAPOLA	1.451604444509e-08	0.324853862727722	0.927	0.941	0.000421589478818748	0	PAPOLA
FAU	1.50098212529805e-08	0.295698828154496	0.974	0.981	0.000435930238650311	0	FAU
RBM4	1.57189891071825e-08	0.379477353217793	0.786	0.753	0.000456526600639902	0	RBM4
CAMLG	1.58865875811631e-08	0.334602882359691	0.658	0.568	0.00046139416311972	0	CAMLG
CYP4V2	1.62346522242283e-08	0.474338558227947	0.691	0.608	0.000471503004548261	0	CYP4V2
C6orf62	1.6344670648058e-08	0.404531255277382	0.991	0.987	0.000474698269631547	0	C6orf62
COPS4	1.69592473630768e-08	0.618405937316079	0.669	0.579	0.000492547421165839	0	COPS4
TMBIM6	1.77379328007665e-08	0.258440159175062	0.998	1	0.000515162782332663	0	TMBIM6
ESD	1.78830873974559e-08	0.455602403448712	0.848	0.798	0.000519378507284312	0	ESD
HAX1	1.82140934209895e-08	0.511124941897922	0.812	0.8	0.000528991915225797	0	HAX1
RPAIN	1.83740283534267e-08	0.274882159988847	0.859	0.832	0.000533636905468571	0	RPAIN
CSTB	1.93121926194724e-08	0.270547478381711	0.951	0.935	0.000560884010247337	0	CSTB
FGD5-AS1	1.95224377644318e-08	0.26763632823666	0.797	0.763	0.000566990159992393	0	FGD5-AS1
ANKRD39	2.02398169080703e-08	0.433981170666856	0.464	0.343	0.000587825002461087	0	ANKRD39
MYL12B	2.11655661037173e-08	0.349933775723052	0.976	0.966	0.000614711536350262	0	MYL12B
PSMC3	2.41796574857062e-08	0.340385432549213	0.656	0.557	0.000702249792357365	0	PSMC3
PSMD4	2.46861623979549e-08	0.501512534806115	0.702	0.621	0.000716960214523804	0	PSMD4
EIF4E	2.67810922748013e-08	0.349935610297525	0.925	0.91	0.000777803262937053	0	EIF4E
HSPA9	2.78060396662617e-08	0.352252313524686	0.921	0.896	0.000807570810027238	0	HSPA9
COMMD10	2.78922014450402e-08	0.609342545196182	0.603	0.5	0.000810073206568301	0	COMMD10
ATP2C1	2.89131693886568e-08	0.253530885793023	0.671	0.579	0.000839725178554758	0	ATP2C1
TXN	2.91919049835997e-08	0.273079304610301	0.969	0.966	0.000847820496438685	0	TXN
CD47	2.92340221525395e-08	0.423546614619412	0.901	0.901	0.000849043705376205	0	CD47
RAN	2.93254193108211e-08	0.359989859916553	0.954	0.947	0.000851698153044178	0	RAN
NEUROD1	3.00690261360951e-08	0.281130341200848	0.98	0.961	0.000873294726070611	0	NEUROD1
PARVG	3.38526661765252e-08	0.444846067038215	0.561	0.497	0.000983182983764821	0	PARVG
BCAP31	3.39166291813099e-08	0.363898600987337	0.868	0.848	0.000985040661312783	0	BCAP31
PRPF39	3.61033189086594e-08	0.292320661459978	0.892	0.836	0.0010485486910642	0	PRPF39
TWSG1	4.06129429196134e-08	0.384926909314417	0.406	0.299	0.00117952170121433	0	TWSG1
SNX6	4.18703434165799e-08	0.254326751731409	0.74	0.68	0.00121604038384773	0	SNX6
UBE4A	4.26648473824298e-08	0.547518104104209	0.823	0.785	0.00123911516252791	0	UBE4A
DYNLL1	4.27519677285004e-08	0.353589313327302	0.954	0.918	0.00124164539873884	0	DYNLL1
DAP3	4.49632001670807e-08	0.385066726965611	0.715	0.65	0.00130586622245253	0	DAP3
TRNI	5.32038978819443e-08	0.344316972134067	0.355	0.23	0.00154520080618531	0	TRNI
NARS	5.88275967150133e-08	0.381972130635425	0.883	0.867	0.00170852989139413	0	NARS
NUDT4	5.91483103049757e-08	0.314910725843048	0.945	0.904	0.00171784437618741	0	NUDT4
PAICS	5.93244926457115e-08	0.261867888084925	0.563	0.457	0.0017229612399094	0	PAICS
COQ10A	5.95099968931399e-08	0.276496380487663	0.344	0.229	0.00172834883976746	0	COQ10A
GNPDA1	6.02845661597514e-08	0.295385425194656	0.631	0.499	0.00175084465497766	0	GNPDA1
NT5DC1	6.23106736744311e-08	0.321055054713457	0.528	0.416	0.0018096888955265	0	NT5DC1
BUB3	6.27281849370386e-08	0.404542455318364	0.722	0.628	0.00182181467512641	0	BUB3
ACTR10	6.6512723354357e-08	0.529458965094419	0.795	0.758	0.00193172902438059	0	ACTR10
PSMB6	6.80544521969837e-08	0.341913214086068	0.945	0.932	0.001976505455157	0	PSMB6
GFPT1	6.85703229753333e-08	0.264020733629592	0.896	0.889	0.0019914878901726	0	GFPT1
ZZZ3	7.0627334319735e-08	0.268657767403344	0.629	0.546	0.00205122967064806	0	ZZZ3
TCEAL4	7.29518992778181e-08	0.356271656676531	0.936	0.923	0.00211874201072567	0	TCEAL4
TERF2IP	7.38252878384077e-08	0.381294898232405	0.907	0.875	0.00214410783469087	0	TERF2IP
LAMTOR3	7.48643460666377e-08	0.301337961954431	0.757	0.69	0.00217428520281336	0	LAMTOR3
LRRC42	7.5175327395009e-08	0.389154742376414	0.442	0.323	0.00218331703353325	0	LRRC42
ARPP19	7.51812517478259e-08	0.274851203348778	0.94	0.946	0.00218348909451211	0	ARPP19
FOXP1	7.80474962517527e-08	0.25573443049383	0.918	0.908	0.00226673343363965	0	FOXP1
MRPL50	7.956999270061e-08	0.433095300052286	0.616	0.535	0.00231095129800382	0	MRPL50
CDC42BPA	8.22988702180292e-08	0.271958644846459	0.918	0.918	0.00239020608774222	0	CDC42BPA
TMEM66	8.23118317518026e-08	0.454936770520552	0.96	0.965	0.0023905825295676	0	TMEM66
SPAG16	8.39669213589737e-08	0.274382881570952	0.689	0.625	0.00243865129702867	0	SPAG16
CCDC23	8.53405493938289e-08	0.274752531736892	0.366	0.245	0.00247854557604497	0	CCDC23
SEP15	8.64022891259749e-08	0.429852841117102	0.872	0.875	0.00250938168308569	0	SEP15
RPS15	8.90107576537582e-08	0.250632319868176	0.998	0.995	0.0025851394345381	0	RPS15
EAPP	9.19581275668598e-08	0.504534047603117	0.715	0.691	0.00267073989892431	0	EAPP
ANXA7	9.64550743211467e-08	0.390515522364968	0.971	0.974	0.00280134472350906	0	ANXA7
GPX4	9.71064441998001e-08	0.28292810273887	0.98	0.977	0.0028202624588948	0	GPX4
C19orf53	9.82881621855826e-08	0.327116561448323	0.832	0.78	0.00285458309435588	0	C19orf53
COX15	9.87516680987668e-08	0.272060732699396	0.578	0.482	0.00286804469659249	0	COX15
DDX1	1.01678423763916e-07	0.38376689409979	0.887	0.854	0.00295304646137542	0	DDX1
CPEB4	1.04001384178175e-07	0.314574803092062	0.916	0.901	0.00302051220068674	0	CPEB4
C6orf48	1.04875124592414e-07	0.501978107473253	0.806	0.76	0.00304588824353747	0	C6orf48
DYNLT1	1.15186781334317e-07	0.469142043801985	0.885	0.872	0.00334536969029256	0	DYNLT1
VMP1	1.1525315343239e-07	0.466842537427207	0.79	0.707	0.00334729733513691	0	VMP1
TMCC1	1.2552134036039e-07	0.251469192805087	0.488	0.38	0.00364551628808681	0	TMCC1
GAS2	1.37131076684226e-07	0.304513203607394	0.634	0.512	0.00398269786013997	0	GAS2
RAP1B	1.42212550757182e-07	0.434910545358411	0.733	0.668	0.00413027911164084	0	RAP1B
EIF3D	1.73929934935489e-07	0.401398034234227	0.689	0.601	0.00505144710033142	0	EIF3D
ARL6IP1	1.80841577829517e-07	0.356114508143822	0.925	0.929	0.00525218194490267	0	ARL6IP1
SDCBP	1.97349577434586e-07	0.433733571867472	0.841	0.808	0.00573162377743269	0	SDCBP
PPT1	1.99865207856586e-07	0.393232278560248	0.881	0.895	0.00580468523177882	0	PPT1
SYNGR4	2.03362198937189e-07	0.302897331271772	0.464	0.351	0.00590624834373278	0	SYNGR4
RBBP5	2.10592715185056e-07	0.303093546990055	0.79	0.699	0.00611624422711959	0	RBBP5
LIMCH1	2.14815330879118e-07	0.424085512515269	0.905	0.926	0.00623888165472223	0	LIMCH1
ARMCX3	2.17131406738313e-07	0.305754164900727	0.773	0.704	0.00630614744590081	0	ARMCX3
SLU7	2.43118177309918e-07	0.331114774847912	0.755	0.726	0.00706088122361196	0	SLU7
ECHS1	2.51468460684192e-07	0.471902441197731	0.795	0.754	0.00730339850365098	0	ECHS1
TCEA1	2.51510394049353e-07	0.383798874464801	0.77	0.693	0.00730461637437536	0	TCEA1
TRNN	2.56933383159196e-07	0.525208043621389	0.958	0.955	0.00746211624709253	0	TRNN
PRDX2	2.593860341165e-07	0.324667369567388	0.987	0.972	0.00753334858884552	0	PRDX2
DNAJC12	2.70292415806155e-07	0.371804745641022	0.843	0.82	0.00785010263225817	0	DNAJC12
PCMT1	2.70469135354407e-07	0.519657063211328	0.806	0.754	0.00785523509809805	0	PCMT1
GPI	2.84740032926345e-07	0.31496361130224	0.945	0.958	0.00826970477627983	0	GPI
PRKRA	2.85567828709312e-07	0.299312900982362	0.543	0.433	0.00829374644920454	0	PRKRA
MRPS33	2.92190196842956e-07	0.45019008320903	0.81	0.77	0.00848607988690996	0	MRPS33
C14orf166	3.26183023171341e-07	0.460761437632088	0.784	0.763	0.00947333354196526	0	C14orf166
STRAP	3.51482909094312e-07	0.412192482819824	0.927	0.907	0.0102081181288261	0	STRAP
RPL9	3.52619361439379e-07	0.362596132121965	0.998	0.995	0.0102411241142839	0	RPL9
ZNF91	3.81446260569583e-07	0.380906926350722	0.737	0.657	0.0110783437457224	0	ZNF91
SPRYD3	3.95653468850982e-07	0.363916082015271	0.671	0.603	0.0114909636958391	0	SPRYD3
LAMTOR1	4.00085770258701e-07	0.373402965007341	0.753	0.703	0.0116196910256235	0	LAMTOR1
TMEM5	5.09430547296292e-07	0.256086175811715	0.468	0.358	0.0147953913851262	0	TMEM5
TBCC	5.30550140979394e-07	0.286839904730228	0.501	0.393	0.0154087677444645	0	TBCC
EIF2S1	5.41196312805965e-07	0.293572560354307	0.715	0.659	0.0157179645128236	0	EIF2S1
TERF2	5.61832779670095e-07	0.305380887953265	0.444	0.339	0.0163173094199586	0	TERF2
ALG5	5.62976347878974e-07	0.535944913476346	0.563	0.483	0.016350522071449	0	ALG5
BZW2	5.73648390082682e-07	0.306985271410733	0.34	0.23	0.0166604701931713	0	BZW2
NDUFS5	5.89571839918174e-07	0.27880372398849	0.967	0.971	0.0171229349467435	0	NDUFS5
PMPCB	6.1057177426503e-07	0.263522265932785	0.673	0.6	0.0177328360399793	0	PMPCB
HSPH1	6.24718181035787e-07	0.255630049656466	0.724	0.671	0.0181436901318224	0	HSPH1
PYROXD1	6.49350561997011e-07	0.25572600773866	0.552	0.485	0.0188590883720792	0	PYROXD1
TMEM30A	6.56441005025283e-07	0.277893033974898	0.795	0.737	0.0190650161089493	0	TMEM30A
COPS2	6.72256122702928e-07	0.331396500822559	0.656	0.582	0.0195243345716611	0	COPS2
TCEAL8	6.76801243549272e-07	0.440568097456669	0.896	0.871	0.0196563385164015	0	TCEAL8
C11orf71	6.83989128344172e-07	0.335499238099662	0.528	0.426	0.0198650962544998	0	C11orf71
CCNC	7.32350994005508e-07	0.325408275454464	0.709	0.652	0.021269669918902	0	CCNC
TECR	7.43351286301506e-07	0.46433732452023	0.841	0.856	0.0215891514080546	0	TECR
GOLGA7	8.18161767377767e-07	0.32841809200473	0.545	0.444	0.0237618722099525	0	GOLGA7
IGBP1	9.22554485425795e-07	0.353045775028443	0.536	0.416	0.0267937499202214	0	IGBP1
GOLPH3L	9.4958044375906e-07	0.323398999324775	0.461	0.366	0.0275786648280944	0	GOLPH3L
PPCS	9.71990370336892e-07	0.342658954411076	0.68	0.628	0.0282295163256944	0	PPCS
NECAB1	1.0029735387535e-06	0.374146404269671	0.47	0.374	0.0291293604860179	0	NECAB1
CYB5A	1.01080061487022e-06	0.465545674176093	0.744	0.723	0.0293566822576757	0	CYB5A
PGM3	1.01130186729627e-06	0.261498077684876	0.634	0.577	0.0293712401318857	0	PGM3
ACVR2A	1.02977616429592e-06	0.260993160812255	0.545	0.465	0.0299077891396465	0	ACVR2A
APMAP	1.03392860862617e-06	0.399548199016861	0.68	0.596	0.0300283885803297	0	APMAP
TRAPPC6B	1.13736942235091e-06	0.28595571381167	0.481	0.376	0.0330326201333373	0	TRAPPC6B
TRIQK	1.15518179018319e-06	0.3174126431212	0.671	0.607	0.0335499447322903	0	TRIQK
SNAP25	1.16552130519226e-06	0.331259456177095	0.883	0.894	0.0338502352666988	0	SNAP25
TCP1	1.20941426868426e-06	0.328639319469245	0.81	0.763	0.0351250186053969	0	TCP1
ZCCHC17	1.2393241006164e-06	0.265490928203409	0.581	0.504	0.035993689854202	0	ZCCHC17
MRPL40	1.26545464849568e-06	0.305151049985072	0.709	0.654	0.0367525993562602	0	MRPL40
ZBTB8OS	1.29316582594399e-06	0.301579044115149	0.777	0.717	0.0375574150828913	0	ZBTB8OS
NSRP1	1.29615099079633e-06	0.272804046468653	0.868	0.865	0.0376441132256977	0	NSRP1
MARCH7	1.29901841757186e-06	0.305345389756334	0.821	0.795	0.0377273919015394	0	MARCH7
P4HB	1.43849927602427e-06	0.317416456938324	0.903	0.867	0.0417783344735729	0	P4HB
TRNA	1.44721802826652e-06	0.495684216314299	0.932	0.908	0.0420315531949446	0	TRNA
TOMM5	1.53636571139331e-06	0.361649403331974	0.885	0.872	0.0446206693559958	0	TOMM5
ATP6V1F	1.69230329886119e-06	0.362688857737932	0.885	0.889	0.0491495647088256	0	ATP6V1F
MRPL45	1.71600602417672e-06	0.394310533262223	0.541	0.431	0.0498379629601645	0	MRPL45
ENPP5	1.74366635219838e-06	0.326106643394616	0.638	0.557	0.0506413018668975	0	ENPP5
YWHAB	1.84338087043423e-06	0.316512219919469	0.951	0.968	0.0535373106200213	0	YWHAB
NCKAP1	1.95405340328477e-06	0.354939577025984	0.887	0.87	0.0567515729915994	0	NCKAP1
CCNG1	2.01090107497904e-06	0.419821420234121	0.631	0.545	0.0584025999206163	0	CCNG1
ZFAND1	2.09958203373769e-06	0.412936784225319	0.647	0.574	0.0609781610058437	0	ZFAND1
COPS6	2.11691103837448e-06	0.4253688769086	0.773	0.766	0.0614814472875099	0	COPS6
TMOD1	2.12707980507718e-06	0.330873534631434	0.821	0.819	0.0617767787788565	0	TMOD1
UBL3	2.16987499115241e-06	0.27176381638296	0.733	0.687	0.0630196793680396	0	UBL3
MSMO1	2.2803745929837e-06	0.467111064843075	0.742	0.731	0.0662289193040257	0	MSMO1
PCYOX1	2.34270128899454e-06	0.254316998385918	0.737	0.701	0.0680390735362684	0	PCYOX1
SGCE	2.37698000824802e-06	0.262547082849584	0.746	0.703	0.0690346303795471	0	SGCE
ATP6V0A1	2.52176439042263e-06	0.267955858515508	0.832	0.777	0.0732396031910445	0	ATP6V0A1
CNEP1R1	2.67716684560448e-06	0.571499488216035	0.461	0.377	0.077752956696891	0	CNEP1R1
SCAMP1	2.7622497751631e-06	0.268719835924146	0.821	0.812	0.080224020220062	0	SCAMP1
PSMA4	2.87192047537624e-06	0.41243106511355	0.85	0.816	0.0834091863663522	0	PSMA4
PIGP	3.07584462314205e-06	0.316047134010844	0.751	0.679	0.0893317553899146	0	PIGP
HSD17B4	3.15910535389713e-06	0.365335785546374	0.598	0.493	0.0917498967932342	0	HSD17B4
IARS	3.21125460952159e-06	0.331149094753655	0.742	0.697	0.0932644676243356	0	IARS
BRK1	3.48355862236986e-06	0.320611058399585	0.932	0.903	0.101172993069488	0	BRK1
GSTO1	3.55325739027255e-06	0.321070330624059	0.784	0.735	0.103197254385686	0	GSTO1
C12orf23	3.60296386129343e-06	0.386753118522896	0.834	0.836	0.104640879423545	0	C12orf23
CLNS1A	3.62966697554893e-06	0.319949594691535	0.574	0.472	0.105416417970867	0	CLNS1A
CCT3	3.8144522343628e-06	0.447905694272602	0.799	0.797	0.110783136242599	0	CCT3
HMGN1	3.92753425327589e-06	0.316037736855279	0.872	0.843	0.114067377317892	0	HMGN1
DANCR	4.17455050049397e-06	0.289352711433514	0.483	0.393	0.121241470185846	0	DANCR
C11orf73	4.33449603325205e-06	0.433969220080448	0.53	0.464	0.125886768293739	0	C11orf73
ATP5H	4.43528954961773e-06	0.352045036183691	0.925	0.932	0.128814114389548	0	ATP5H
USMG5	4.76356638803627e-06	0.252624690360016	0.985	0.985	0.138348258607738	0	USMG5
JAK1	4.84170179903436e-06	0.267414274442074	0.79	0.773	0.140617545349355	0	JAK1
PQBP1	4.93637261612606e-06	0.325791567046193	0.605	0.522	0.143367069890149	0	PQBP1
NDUFB6	5.05327304841021e-06	0.26712885832696	0.901	0.885	0.146762209144978	0	NDUFB6
PON3	5.06596218287614e-06	0.402049563395845	0.358	0.257	0.147130739677272	0	PON3
ALDH9A1	5.45226739146445e-06	0.324351530790654	0.744	0.673	0.158350201850302	0	ALDH9A1
BAZ2B	5.75123624794089e-06	0.255195696753467	0.87	0.901	0.167033154348947	0	BAZ2B
LUC7L3	5.86861450669056e-06	0.370343121470951	0.967	0.976	0.170442171117814	0	LUC7L3
RNF168	6.0469611237902e-06	0.328057257193132	0.448	0.347	0.175621891918239	0	RNF168
LRRC1	6.21765981433e-06	0.281502208326285	0.448	0.368	0.180579493987586	0	LRRC1
PDCD10	6.29575516004244e-06	0.368299548039514	0.731	0.677	0.182847617113113	0	PDCD10
M6PR	6.84991470672842e-06	0.360058353743678	0.784	0.742	0.198942072827513	0	M6PR
DNAJC19	6.90958118303447e-06	0.312597820241818	0.709	0.642	0.20067496629887	0	DNAJC19
RAP2C	7.03389705148215e-06	0.364707947739418	0.556	0.463	0.204285472066196	0	RAP2C
PIP4K2A	7.50775205611824e-06	0.292093301152317	0.371	0.275	0.218047642965842	0	PIP4K2A
ZC3H15	8.1256966889177e-06	0.30464062063811	0.788	0.778	0.235994608936237	0	ZC3H15
SNAPIN	8.23297187097336e-06	0.29996253072312	0.525	0.451	0.239110202048679	0	SNAPIN
RDH11	8.47464723896228e-06	0.408031980382384	0.887	0.884	0.246129179761182	0	RDH11
UFM1	8.55626901041888e-06	0.3181753777614	0.857	0.824	0.248499720869595	0	UFM1
SLC35A5	8.58499163015722e-06	0.350511290407188	0.43	0.348	0.249333911914656	0	SLC35A5
FGF14	8.82339882713811e-06	0.507123729452207	0.419	0.348	0.256257972136572	0	FGF14
ARF4	8.9487098740294e-06	0.490630927365201	0.852	0.84	0.259897380871436	0	ARF4
LOC284454	9.33696238316623e-06	0.324798292106249	0.285	0.19	0.271173398494297	0	LOC284454
RAB6A	9.36161331938646e-06	0.304726740322249	0.728	0.678	0.271889335634941	0	RAB6A
NCOA4	9.64023768657589e-06	0.363842833007236	0.68	0.629	0.279981423131224	0	NCOA4
VDAC2	9.9315947986091e-06	0.395715927604092	0.812	0.805	0.288443307736004	0	VDAC2
DHPS	1.00829263913497e-05	0.428450182893085	0.618	0.538	0.292838431183968	0	DHPS
PRCP	1.02320750882723e-05	0.429482815987684	0.503	0.413	0.297170156788693	0	PRCP
RHBDD2	1.05450982613567e-05	0.3231275224159	0.87	0.848	0.306261288804582	0	RHBDD2
PPWD1	1.06741291010798e-05	0.303971370290119	0.547	0.478	0.310008731482662	0	PPWD1
MGST3	1.12344134523532e-05	0.264035848047426	0.852	0.828	0.326281069896694	0	MGST3
ECI2	1.12697969043733e-05	0.344456686109683	0.671	0.598	0.327308711493713	0	ECI2
C11orf49	1.19409787809192e-05	0.257367550451531	0.55	0.472	0.346801846734236	0	C11orf49
PPA2	1.21468437262698e-05	0.320883430498472	0.777	0.765	0.352780782342055	0	PPA2
RABGGTB	1.27335466316814e-05	0.439819647730612	0.611	0.563	0.369820394823923	0	RABGGTB
ARRDC3	1.2956928335369e-05	0.62882893335667	0.817	0.811	0.376308069644123	0	ARRDC3
HERC2P7	1.41032202980143e-05	0.327214770024307	0.517	0.412	0.409599827115228	0	HERC2P7
ATP5C1	1.42350651587341e-05	0.323901740708874	0.927	0.931	0.413428997405115	0	ATP5C1
MAPK1IP1L	1.4507233189941e-05	0.374854713680785	0.887	0.906	0.421333573535456	0	MAPK1IP1L
PPP3CA	1.48071374251004e-05	0.359874001290259	0.94	0.941	0.430043692237192	0	PPP3CA
SNURF	1.57061895408122e-05	0.500775665236038	0.989	0.983	0.45615486283381	0	SNURF
PTGES3	1.61744568033329e-05	0.305688495051326	0.934	0.9	0.469754748939196	0	PTGES3
CCDC167	1.62242190818018e-05	0.333504835830327	0.302	0.214	0.471199994792771	0	CCDC167
LGALS3BP	1.74581268793626e-05	0.387427547224536	0.854	0.831	0.507036378957328	0	LGALS3BP
BEX4	1.75759626762172e-05	0.37154906131793	0.89	0.877	0.510458684005376	0	BEX4
RNF7	1.83103721805057e-05	0.340206857837104	0.731	0.711	0.531788139238426	0	RNF7
RDX	1.95817709010342e-05	0.363515249860769	0.804	0.787	0.568713372278737	0	RDX
PCP4	1.99448416068739e-05	0.623885897488698	0.691	0.646	0.579258034788439	0	PCP4
VMA21	2.08920299692609e-05	0.478312911767485	0.682	0.653	0.606767226397244	0	VMA21
SSB	2.1211821579927e-05	0.282556100036063	0.907	0.901	0.616054934145818	0	SSB
DYNLT3	2.16146635562582e-05	0.458812026736465	0.857	0.858	0.627754673664406	0	DYNLT3
CLIP1	2.20652919462688e-05	0.264651210268241	0.649	0.62	0.640842273995486	0	CLIP1
ILF3-AS1	2.37645644741414e-05	0.27186366435234	0.614	0.562	0.690194246022488	0	ILF3-AS1
ATP6V0B	2.38567125293337e-05	0.26278424380624	0.976	0.988	0.692870501989439	0	ATP6V0B
RPSA	2.39166562784756e-05	0.296793842444147	0.949	0.96	0.694611448295766	0	RPSA
CS	2.39774323532308e-05	0.338084263558052	0.68	0.615	0.696376567834881	0	CS
MDM2	2.44741069787174e-05	0.275617998972323	0.77	0.713	0.710801488982889	0	MDM2
PSMC2	2.56966878238385e-05	0.295606624099691	0.706	0.653	0.746308904467742	0	PSMC2
SF3B1	2.67559621875355e-05	0.307739009473226	0.909	0.898	0.777073409812594	0	SF3B1
SSR4	2.7105173028917e-05	0.259106365055183	1	1	0.787215540278837	0	SSR4
LYRM5	2.73192945448602e-05	0.264053039497148	0.645	0.586	0.793434271466376	0	LYRM5
SRI	2.76981519314618e-05	0.29403169667875	0.781	0.749	0.804437426545446	0	SRI
SRP19	2.80645738696182e-05	0.259579951326776	0.828	0.81	0.815079418895321	0	SRP19
EDN3	2.87036835087281e-05	0.510488047478981	0.477	0.405	0.83364108014399	0	EDN3
POP5	2.93653804885247e-05	0.306544285862415	0.446	0.351	0.852858745528223	0	POP5
ARGLU1	3.02145270025554e-05	0.342818202124795	0.945	0.972	0.877520507735217	0	ARGLU1
TIMM17A	3.07844849263137e-05	0.397050156530653	0.594	0.528	0.89407379571493	0	TIMM17A
SNRNP27	3.15748045478129e-05	0.347515543053613	0.845	0.831	0.917027048482131	0	SNRNP27
ERP44	3.30334706171001e-05	0.251414243440203	0.724	0.72	0.959391087132437	0	ERP44
TRNS1	3.31289660019929e-05	0.423141025926731	0.996	0.992	0.962164559595879	0	TRNS1
TMEM14B	3.39228593307389e-05	0.282921037466202	0.857	0.831	0.985221603542651	0	TMEM14B
TSN	3.51711301908434e-05	0.422810059590572	0.563	0.494	1	0	TSN
FAM173B	3.53857301262776e-05	0.350249822618605	0.366	0.285	1	0	FAM173B
UGCG	3.7776132689646e-05	0.291243909824668	0.589	0.551	1	0	UGCG
SLC35A1	3.9703858241489e-05	0.28933229318661	0.448	0.351	1	0	SLC35A1
ARG2	4.16119125375693e-05	0.518371572604924	0.629	0.585	1	0	ARG2
COX16	4.1899520059082e-05	0.303710472500097	0.918	0.916	1	0	COX16
PDS5B	4.30408563974127e-05	0.293251410250584	0.876	0.876	1	0	PDS5B
VDAC3	4.50439497647303e-05	0.382128423033723	0.845	0.854	1	0	VDAC3
SLC39A6	4.97525399469554e-05	0.315978530153187	0.706	0.693	1	0	SLC39A6
CWC15	5.04842886868783e-05	0.296109626521352	0.755	0.729	1	0	CWC15
ARL1	5.08950509739242e-05	0.335316531107312	0.868	0.85	1	0	ARL1
NEDD8	5.19316949382719e-05	0.285164851251629	0.921	0.925	1	0	NEDD8
RNF34	5.22702782395009e-05	0.417283493442668	0.453	0.38	1	0	RNF34
RGS9	5.49939027172079e-05	0.30436439154146	0.651	0.603	1	0	RGS9
MAPRE1	5.5490852898036e-05	0.30240003374934	0.872	0.86	1	0	MAPRE1
EIF2B3	5.6419823466005e-05	0.380341841623175	0.541	0.485	1	0	EIF2B3
MRPS18B	5.89118820698282e-05	0.327438679828271	0.66	0.61	1	0	MRPS18B
DAZAP2	6.06891592430725e-05	0.331904515600467	0.817	0.815	1	0	DAZAP2
PLA1A	6.10569173451484e-05	0.257345609617612	0.296	0.21	1	0	PLA1A
SRP54	6.41209054495857e-05	0.41639513514687	0.742	0.73	1	0	SRP54
KLF10	6.69259200556975e-05	0.297158882250582	0.746	0.729	1	0	KLF10
PTS	7.12807494447577e-05	0.357154549912287	0.777	0.763	1	0	PTS
SNAPC1	7.16064084058379e-05	0.311329467208433	0.406	0.343	1	0	SNAPC1
F3	7.32409191481576e-05	0.424665731073858	0.497	0.429	1	0	F3
ATXN7L3B	7.32556915537237e-05	0.296484913125173	0.742	0.73	1	0	ATXN7L3B
GGNBP2	8.08938339168693e-05	0.283101078476699	0.74	0.701	1	0	GGNBP2
FAM219B	8.23607340160123e-05	0.303619698609612	0.413	0.334	1	0	FAM219B
CCT4	8.26688762363141e-05	0.319595586138699	0.751	0.741	1	0	CCT4
USP11	8.37211448770555e-05	0.293895376579343	0.795	0.797	1	0	USP11
OXA1L	8.86379657703015e-05	0.251062360126402	0.556	0.465	1	0	OXA1L
TRAPPC2L	9.23686523350741e-05	0.268921421078758	0.68	0.638	1	0	TRAPPC2L
MEA1	9.48703302608044e-05	0.3572590303361	0.711	0.694	1	0	MEA1
MAST3	9.54987332114888e-05	0.301222308101411	0.623	0.557	1	0	MAST3
CASC4	9.58824513879979e-05	0.394364159856722	0.826	0.831	1	0	CASC4
DDX39B	0.000101340405652423	0.266929923786481	0.625	0.589	1	0	DDX39B
FRG1	0.000102583181932569	0.288862330260842	0.806	0.805	1	0	FRG1
TPI1	0.00010393887569648	0.285991919552129	0.989	0.985	1	0	TPI1
ICA1	0.000104408323514979	0.316551002108474	0.74	0.713	1	0	ICA1
MRPS21	0.000104438433442078	0.321008676850326	0.876	0.898	1	0	MRPS21
MTIF3	0.000106071109069225	0.2920611509176	0.777	0.733	1	0	MTIF3
ARV1	0.000109070478407436	0.268487087463122	0.402	0.314	1	0	ARV1
ZC3H11A	0.000120967322707783	0.261812973880351	0.854	0.879	1	0	ZC3H11A
NRD1	0.000133506277760186	0.328338243898715	0.768	0.772	1	0	NRD1
TFRC	0.00013443577983838	0.292708388410342	0.682	0.636	1	0	TFRC
CAP1	0.000135597665721093	0.301092254342152	0.845	0.859	1	0	CAP1
PWARSN	0.000143845871579935	0.303058297746997	0.64	0.593	1	0	PWARSN
OARD1	0.000153455015810831	0.349403675183905	0.472	0.393	1	0	OARD1
SEC11A	0.000157902975447193	0.277490627177494	0.777	0.737	1	0	SEC11A
PAPSS2	0.000158266592378826	0.34975337172983	0.932	0.939	1	0	PAPSS2
PPID	0.000163392721159894	0.318770440532943	0.512	0.446	1	0	PPID
NHP2	0.000164429520092016	0.439689816994661	0.821	0.819	1	0	NHP2
RN7SL1	0.000166854785582371	0.349422116935306	0.618	0.546	1	0	RN7SL1
PSMD6	0.000179142070120633	0.429253556465296	0.724	0.722	1	0	PSMD6
TALDO1	0.000181154030848214	0.461661846075076	0.709	0.699	1	0	TALDO1
PLOD2	0.000181210646819169	0.304884315699847	0.713	0.698	1	0	PLOD2
TRMT11	0.000182674218012704	0.363465057007181	0.457	0.395	1	0	TRMT11
IER3IP1	0.000187408489230755	0.390857997085232	0.879	0.9	1	0	IER3IP1
FAM46C	0.000202832709591138	0.272988742324049	0.852	0.84	1	0	FAM46C
NDUFB8	0.000203238960117353	0.272582481540733	0.978	0.983	1	0	NDUFB8
RAB1A	0.000216887760598191	0.293337926517234	0.912	0.919	1	0	RAB1A
NSF	0.000217276364225693	0.370793519342334	0.671	0.639	1	0	NSF
COMMD3	0.00022103004512225	0.465279588368413	0.671	0.657	1	0	COMMD3
C1orf27	0.000221683821538983	0.343508138329601	0.629	0.603	1	0	C1orf27
NDUFA5	0.000223129510419865	0.26972024361832	0.94	0.928	1	0	NDUFA5
ZNF165	0.000225630584509364	0.639971021086893	0.439	0.366	1	0	ZNF165
HBP1	0.000236019484461644	0.433272149489057	0.523	0.489	1	0	HBP1
UBE2N	0.000246265786290154	0.25128282520675	0.826	0.791	1	0	UBE2N
TM9SF2	0.000247522078529042	0.35731811985238	0.896	0.91	1	0	TM9SF2
MTPAP	0.000253162243929915	0.409504274578015	0.631	0.616	1	0	MTPAP
IK	0.000262929107371918	0.274120608205257	0.815	0.8	1	0	IK
SEC61B	0.000264527294884521	0.25043937411396	0.958	0.962	1	0	SEC61B
NDUFAF2	0.00026471665508181	0.392296147187819	0.631	0.601	1	0	NDUFAF2
CLK4	0.000268078753617309	0.260426686595284	0.364	0.29	1	0	CLK4
PHYH	0.000284379126266882	0.395560174314027	0.609	0.584	1	0	PHYH
TPD52	0.000288013362669885	0.277373566897023	0.962	0.974	1	0	TPD52
TXNDC9	0.000291658062237823	0.333791357540493	0.552	0.491	1	0	TXNDC9
SIVA1	0.00029526246217886	0.28362907789305	0.545	0.47	1	0	SIVA1
RN7SL2	0.000299218261172095	0.320067179529315	0.605	0.546	1	0	RN7SL2
EIF3G	0.000301696135262664	0.257211310361886	0.506	0.423	1	0	EIF3G
ZC3HAV1	0.000306448920427235	0.27485751119903	0.737	0.782	1	0	ZC3HAV1
RAB3GAP1	0.000321705894271259	0.284773969456342	0.704	0.676	1	0	RAB3GAP1
FAM174B	0.000328583886827986	0.301759391318232	0.675	0.646	1	0	FAM174B
MAGT1	0.000336224094254805	0.261516201002542	0.603	0.572	1	0	MAGT1
LSM10	0.000385854108374305	0.289862545226958	0.503	0.422	1	0	LSM10
MAT2B	0.000391949780460807	0.288547609592735	0.384	0.318	1	0	MAT2B
TMEM230	0.000392899731837181	0.265502151887268	0.839	0.854	1	0	TMEM230
ARFGAP3	0.000394668576877326	0.304868400159198	0.717	0.714	1	0	ARFGAP3
MED7	0.000395170932242504	0.298603675212221	0.419	0.342	1	0	MED7
ERLEC1	0.000412117195625322	0.280847179556931	0.885	0.869	1	0	ERLEC1
DECR1	0.000436985694789029	0.416012215713806	0.594	0.554	1	0	DECR1
C16orf72	0.000441153224381441	0.288792347741069	0.453	0.388	1	0	C16orf72
PAK1IP1	0.000450236926869023	0.604283747553431	0.466	0.43	1	0	PAK1IP1
NF2	0.000465080348207088	0.263838803446017	0.594	0.576	1	0	NF2
GTF2A2	0.000483115762564869	0.325580203762068	0.768	0.75	1	0	GTF2A2
ZFAND2A	0.000498141142745877	0.304209728450203	0.313	0.239	1	0	ZFAND2A
NDUFA9	0.00050061556968245	0.298335414416491	0.755	0.714	1	0	NDUFA9
TPPP3	0.000550966131893818	0.333312744827838	0.453	0.385	1	0	TPPP3
NXF1	0.000555584099591148	0.313072076127176	0.539	0.489	1	0	NXF1
MRPL46	0.000569829478760709	0.266304599370655	0.4	0.327	1	0	MRPL46
GARS	0.00058976161284337	0.298004950717388	0.717	0.695	1	0	GARS
TOM1L1	0.000590181897192236	0.428604681243231	0.66	0.622	1	0	TOM1L1
API5	0.000603916787798102	0.292273035447534	0.673	0.648	1	0	API5
COPB1	0.000630464398298268	0.352952870457285	0.914	0.913	1	0	COPB1
HNRNPH2	0.000632094758124246	0.311704234695912	0.923	0.931	1	0	HNRNPH2
MRPL36	0.000643122826208665	0.318830154279695	0.625	0.587	1	0	MRPL36
PSMA5	0.000696563302480044	0.375338401821584	0.658	0.639	1	0	PSMA5
PRR13	0.000698175466260303	0.2807385935393	0.834	0.857	1	0	PRR13
ZFAND6	0.000713906351372928	0.283086607218196	0.74	0.727	1	0	ZFAND6
IST1	0.000749920956346175	0.252976797878499	0.817	0.792	1	0	IST1
MRPL49	0.000775806091516655	0.298873053469336	0.457	0.396	1	0	MRPL49
ATP5B	0.000776745446683717	0.259618708710914	0.969	0.971	1	0	ATP5B
MRPS9	0.000786999587481893	0.391685683364359	0.459	0.397	1	0	MRPS9
NMD3	0.000810328839606903	0.306459343186272	0.636	0.607	1	0	NMD3
LSM12	0.000826884779940352	0.34503575678586	0.923	0.916	1	0	LSM12
DDX47	0.00089973443286501	0.473211090166021	0.503	0.457	1	0	DDX47
ATF4	0.000926474307824801	0.349044359838285	0.801	0.801	1	0	ATF4
TMX2	0.000984955937508323	0.543707609454692	0.53	0.487	1	0	TMX2
FTL	0.00100578657861513	0.310830513401561	1	1	1	0	FTL
GNG4	0.00102246315249976	0.283471417841872	0.773	0.781	1	0	GNG4
RANBP6	0.00103609722645264	0.262946257508817	0.461	0.406	1	0	RANBP6
MARS	0.00104143837438556	0.395002534525855	0.618	0.59	1	0	MARS
ZNF280B	0.00105918962624813	0.26069486051029	0.426	0.372	1	0	ZNF280B
PSMA7	0.00108513413205602	0.279412698701275	0.903	0.925	1	0	PSMA7
SLC25A32	0.00109975101342367	0.32321024908142	0.444	0.383	1	0	SLC25A32
POLR2I	0.00110740500531317	0.276772935078147	0.762	0.759	1	0	POLR2I
POLR2B	0.00112324754457945	0.275136096816051	0.757	0.755	1	0	POLR2B
PTBP2	0.00112723652315215	0.42893025531877	0.558	0.539	1	0	PTBP2
TRAPPC2	0.00113903633876261	0.34516088947803	0.618	0.61	1	0	TRAPPC2
SDHD	0.00115567347606953	0.315092970335273	0.808	0.795	1	0	SDHD
GSTM3	0.00115721926183473	0.251812444549411	0.682	0.699	1	0	GSTM3
NDUFB10	0.00120918602607993	0.344328399549401	0.673	0.644	1	0	NDUFB10
CDC16	0.00124900349688838	0.284570277839027	0.561	0.507	1	0	CDC16
HSD17B11	0.0012557326019247	0.272823001305491	0.433	0.376	1	0	HSD17B11
COPS7A	0.00128823640795605	0.307971021095817	0.479	0.407	1	0	COPS7A
ING3	0.001297386262949	0.37029316897679	0.614	0.594	1	0	ING3
OAT	0.00136016297455557	0.334142749836528	0.704	0.711	1	0	OAT
COPS8	0.00136900555301205	0.451412799637784	0.623	0.606	1	0	COPS8
TMEM69	0.00139053604715625	0.312599276207682	0.325	0.262	1	0	TMEM69
TOMM34	0.00145126445254023	0.294807483567505	0.614	0.574	1	0	TOMM34
UBA3	0.00145238898974395	0.3863374923164	0.618	0.567	1	0	UBA3
NECAP1	0.00155508169313063	0.362960136133923	0.6	0.558	1	0	NECAP1
MTERFD2	0.00156823154986635	0.36486425714138	0.269	0.207	1	0	MTERFD2
YIPF1	0.00169313277692781	0.331941545851485	0.331	0.276	1	0	YIPF1
MRPL42	0.00171314508610284	0.289678892656604	0.808	0.82	1	0	MRPL42
SDHAF2	0.00178824011457646	0.290014849629816	0.576	0.542	1	0	SDHAF2
TM2D3	0.00183914542900101	0.328082876052769	0.698	0.674	1	0	TM2D3
ATP5F1	0.00184944900286732	0.307907753838196	0.87	0.898	1	0	ATP5F1
PNRC2	0.00184959355968072	0.297607781217189	0.726	0.708	1	0	PNRC2
MED27	0.00186825522979009	0.281638462868457	0.377	0.333	1	0	MED27
TFG	0.00189151114964243	0.37160719362896	0.636	0.625	1	0	TFG
AARS	0.00220280400763208	0.352403229420638	0.658	0.658	1	0	AARS
DLD	0.00249099753301894	0.286483917203523	0.691	0.664	1	0	DLD
EIF4EBP1	0.00255009225863189	0.313291199766018	0.51	0.458	1	0	EIF4EBP1
METTL21B	0.00260174765683421	0.39526487382107	0.289	0.229	1	0	METTL21B
C9orf72	0.0026963649952835	0.331245598120304	0.472	0.423	1	0	C9orf72
TRIAP1	0.00270861211963898	0.278383213064359	0.371	0.307	1	0	TRIAP1
GYG1	0.00293788019535327	0.375982729426292	0.653	0.62	1	0	GYG1
NOP56	0.00303479645400912	0.318148766558506	0.629	0.635	1	0	NOP56
IDH1	0.00322731704067686	0.388051684686277	0.536	0.509	1	0	IDH1
TSPAN12	0.0032826541861531	0.284965340567186	0.34	0.279	1	0	TSPAN12
BLOC1S2	0.00342213593236711	0.253708650345172	0.545	0.519	1	0	BLOC1S2
ZNF791	0.00369904215983561	0.251955812072068	0.364	0.31	1	0	ZNF791
C2orf74	0.00381175953331174	0.285142478322487	0.594	0.561	1	0	C2orf74
SCFD1	0.00436791062676398	0.32693933605284	0.788	0.821	1	0	SCFD1
MDH2	0.00444919189246684	0.323701172716485	0.876	0.889	1	0	MDH2
CDC123	0.00446723995898368	0.328785878349582	0.574	0.564	1	0	CDC123
PPIL4	0.00454304087125968	0.252692103691144	0.684	0.654	1	0	PPIL4
RAB14	0.0046670917855605	0.285412883199338	0.812	0.815	1	0	RAB14
RBM5	0.00468922517150306	0.256358622863011	0.72	0.676	1	0	RBM5
ORC3	0.00482681781704272	0.406959306407478	0.545	0.507	1	0	ORC3
EIF3K	0.00483492670393077	0.302403556151101	0.834	0.862	1	0	EIF3K
PDZD11	0.00485533693281604	0.269262569992811	0.523	0.488	1	0	PDZD11
CHMP5	0.00504063075609519	0.386477312142804	0.773	0.812	1	0	CHMP5
RAB7A	0.00524249352565538	0.252720964243335	0.87	0.886	1	0	RAB7A
GLOD4	0.00544261926790702	0.264488006522573	0.653	0.627	1	0	GLOD4
ARL8B	0.00554164309285536	0.286957710505178	0.755	0.739	1	0	ARL8B
TXN2	0.00556912155465109	0.285280483406748	0.64	0.628	1	0	TXN2
KBTBD4	0.00587119789574794	0.292462794731959	0.32	0.273	1	0	KBTBD4
CLTA	0.00593627723951262	0.251524464206921	0.64	0.605	1	0	CLTA
MTX2	0.00623306364495091	0.267901780242626	0.408	0.35	1	0	MTX2
BRD7	0.00652413220382458	0.338330450109211	0.669	0.669	1	0	BRD7
DNAJC8	0.00688636003811574	0.253238515180184	0.89	0.891	1	0	DNAJC8
BRCC3	0.00689364174579539	0.280326380334269	0.373	0.324	1	0	BRCC3
SDF2	0.00692724494483691	0.264421315063156	0.611	0.582	1	0	SDF2
C16orf80	0.00702759263080231	0.361391665894151	0.561	0.529	1	0	C16orf80
JAZF1	0.00721041655875037	0.251947451989108	0.499	0.458	1	0	JAZF1
TMEM126A	0.00757988005414585	0.298928012158299	0.47	0.425	1	0	TMEM126A
RPP21	0.00777291736564524	0.346790729176439	0.634	0.618	1	0	RPP21
PSMD14	0.00803659643348451	0.323404980045055	0.786	0.778	1	0	PSMD14
TIMM10	0.00854570399312439	0.38245224809438	0.457	0.426	1	0	TIMM10
CNOT2	0.00863669573724992	0.252508232414012	0.614	0.595	1	0	CNOT2
RBM23	0.00885147166900372	0.390012275675776	0.693	0.693	1	0	RBM23
MPC1	0.00905872823678268	0.28835128556022	0.609	0.584	1	0	MPC1
SSBP2	0.0094190733157704	0.262911839811009	0.634	0.612	1	0	SSBP2
GCG	3.19611431390353e-133	1.64443086091284	1	0.992	9.28247480187003e-129	1	GCG
FAP	3.86564454606468e-69	0.88971418001253	0.959	0.513	1.12269914551356e-64	1	FAP
GC	9.50216940686669e-62	0.860040646933367	0.991	0.594	2.75971506083629e-57	1	GC
GLS	4.05481610694466e-59	0.700877004053365	1	0.94	1.17764024193994e-54	1	GLS
TM4SF4	4.9353490210606e-59	1.00215341639169	0.998	0.773	1.43337341618663e-54	1	TM4SF4
PAPPA2	5.44945982502603e-58	0.324398991031112	0.896	0.483	1.58268661698231e-53	1	PAPPA2
TTR	4.84597440795865e-50	0.900047868417362	1	0.999	1.40741634730343e-45	1	TTR
PLCE1	4.04690688826598e-48	0.391829203488973	0.795	0.418	1.17534316755909e-43	1	PLCE1
SLC38A4	1.50610756636162e-47	0.556249675918183	0.97	0.695	4.37418820498405e-43	1	SLC38A4
LOXL4	3.3611856694386e-44	0.539551708458594	0.816	0.438	9.76189153975051e-40	1	LOXL4
IRX2	3.13044772342362e-40	0.300545446612494	0.864	0.45	9.09175932313921e-36	1	IRX2
FXYD5	1.2599253643873e-39	0.647806281172633	0.899	0.558	3.65920123579004e-35	1	FXYD5
PCSK2	7.73663450257471e-32	0.526703761332188	0.998	0.966	2.24695075858277e-27	1	PCSK2
F10	2.05219995405118e-31	0.333503966798895	0.779	0.418	5.96020432655085e-27	1	F10
CRYBA2	2.97237732189625e-31	0.576203152249063	0.908	0.618	8.63267545598329e-27	1	CRYBA2
ALDH1A1	4.40506612608049e-30	0.448037843574658	1	0.987	1.27936335499756e-25	1	ALDH1A1
DPP4	1.48032182627082e-28	0.263194368105432	0.682	0.366	4.29929868003833e-24	1	DPP4
ARX	2.22834687146601e-28	0.289466789632435	0.827	0.492	6.47178781879872e-24	1	ARX
WIPF3	4.06965598821457e-27	0.280307381651826	0.647	0.375	1.18195018865716e-22	1	WIPF3
APOH	3.021026757229e-26	0.472521349318718	0.636	0.334	8.7739680110202e-22	1	APOH
C19orf77	1.27784292500226e-25	0.275936885226327	0.869	0.529	3.71123920708407e-21	1	C19orf77
RGS4	1.2970543378589e-24	0.373724114443323	0.931	0.679	3.76703491344361e-20	1	RGS4
GPX3	5.6584854656822e-23	0.49864553310414	0.988	0.88	1.64339393379808e-18	1	GPX3
PDK4	5.94362111854847e-23	0.30640042960319	0.859	0.677	1.72620588146003e-18	1	PDK4
TMEM176B	7.55833528172244e-22	0.415511669519886	0.991	0.806	2.19516731587065e-17	1	TMEM176B
SPC25	1.62061265364075e-21	0.317420522398922	0.606	0.335	4.70674532996883e-17	1	SPC25
SERPINA1	3.58275733288609e-21	0.324274113018781	0.857	0.635	1.04054021219011e-16	1	SERPINA1
IGFBP7	8.24289491482852e-21	0.290588042061891	0.873	0.616	2.39398397011365e-16	1	IGFBP7
ARRDC4	1.53047647418238e-20	0.452751743948756	0.682	0.445	4.44496282396788e-16	1	ARRDC4
CPNE8	1.9910557583607e-18	0.384361232678575	0.829	0.623	5.78262323900697e-14	1	CPNE8
CLU	3.52907984657256e-18	0.351896643026515	1	0.982	1.02495065984007e-13	1	CLU
NAA20	9.60818845792015e-18	0.422446140641887	0.991	0.963	2.79050617383375e-13	1	NAA20
SPTSSB	1.87096129733122e-17	0.285341101617493	0.567	0.34	5.43383289583906e-13	1	SPTSSB
SPINK4	7.34971333924104e-17	0.330541477667043	0.281	0.108	2.13457724511578e-12	1	SPINK4
ELL2	1.99960097473217e-16	0.271070525205786	0.993	0.922	5.80744111091466e-12	1	ELL2
C10orf10	5.18764961470406e-16	0.324264252950861	0.848	0.665	1.5066490775985e-11	1	C10orf10
IGFBPL1	7.44321642587727e-14	0.347743706750663	0.657	0.447	2.16173334656753e-09	1	IGFBPL1
CHGB	4.45134371724553e-13	0.330260308678358	1	1	1.29280375579962e-08	1	CHGB
HLA-A	7.99715661872723e-13	0.275542703230292	1	0.984	2.32261419677695e-08	1	HLA-A
GSTA1	3.14227057226476e-08	0.373384359562317	0.311	0.192	0.000912609642302854	1	GSTA1
TTR1	3.09126671391548e-41	0.93307331199437	1	0.999	8.97796591722472e-37	2	TTR
FABP5	6.58753037668862e-40	1.20406533092075	0.917	0.538	1.91321644730168e-35	2	FABP5
FTL1	2.84806222683567e-38	0.997948380256316	1	1	8.27162712539884e-34	2	FTL
IRX21	8.14586508672627e-38	0.41598779454047	0.921	0.491	2.36580359713791e-33	2	IRX2
B2M	1.61046901924971e-34	0.544442401487935	1	1	4.67728517260693e-30	2	B2M
IFI30	7.64324786249949e-34	1.08001872495318	0.806	0.484	2.21982847670573e-29	2	IFI30
FABP5P1	5.21682238651954e-32	0.29766270873292	0.849	0.47	1.51512172571687e-27	2	FABP5P1
GLS1	1.98701334259873e-30	0.599984730692013	1	0.948	5.77088285090949e-26	2	GLS
TMEM176A	2.10156053608839e-30	0.638538022997921	0.971	0.701	6.1035622649615e-26	2	TMEM176A
DPP41	5.727142247634e-30	0.369273927797166	0.748	0.392	1.66333392298034e-25	2	DPP4
COTL1	1.6611362489785e-29	0.438977633676898	0.763	0.42	4.82443800790826e-25	2	COTL1
FABP5P7	2.99745423124973e-29	0.447710633296556	0.896	0.542	8.70550632381859e-25	2	FABP5P7
CRH	3.58205199399797e-29	0.398753084244551	0.644	0.303	1.04033536061683e-24	2	CRH
TM4SF41	5.22859269657295e-29	0.7884796158882	1	0.802	1.51854017686568e-24	2	TM4SF4
PLIN3	3.07754596933941e-28	0.384678361305549	0.838	0.508	8.93811675875244e-24	2	PLIN3
C19orf771	1.09744435567145e-27	0.797510739275275	0.885	0.57	3.1873076421766e-23	2	C19orf77
KLHL41	1.46159740654209e-27	0.636272656222595	0.543	0.23	4.24491734782019e-23	2	KLHL41
ALDH1A11	1.67902983200664e-27	0.920335499086923	1	0.988	4.87640634109688e-23	2	ALDH1A1
CD63	2.82620114350811e-27	0.514045301017288	1	0.995	8.20813598109061e-23	2	CD63
FAP1	5.60897718850721e-27	0.549678337638385	0.939	0.575	1.62901524485815e-22	2	FAP
IGFBPL11	2.53245026468625e-26	0.598985492533951	0.763	0.45	7.35499530372828e-22	2	IGFBPL1
LOXL41	1.15934666957904e-25	0.640141980679838	0.809	0.489	3.36709053245841e-21	2	LOXL4
PAPPA21	2.11174452971602e-25	0.271378305044506	0.867	0.544	6.13313963765424e-21	2	PAPPA2
HLA-E	3.11073566371912e-25	0.587788845807261	0.975	0.822	9.03450958813943e-21	2	HLA-E
TMEM176B1	6.570241812816e-25	0.5866737995254	0.989	0.831	1.90819532969615e-20	2	TMEM176B
CLU1	1.2580969762198e-24	0.573801128303189	1	0.984	3.65389104803516e-20	2	CLU
ARRDC41	3.40595739359035e-24	0.392695154383026	0.766	0.456	9.89192205820444e-20	2	ARRDC4
GC1	1.7522129150773e-23	0.577663653941387	0.975	0.65	5.08895196925901e-19	2	GC
CYSTM1	4.83243055350325e-23	0.540177487748552	1	0.971	1.40348280565395e-18	2	CYSTM1
CRYBA21	2.99023883305116e-22	0.652646071806298	0.914	0.654	8.68455064283049e-18	2	CRYBA2
KCTD12	3.16498303341575e-22	0.261467590695451	0.95	0.642	9.19206022394937e-18	2	KCTD12
PLCE11	4.61329803183811e-22	0.344896435750143	0.766	0.474	1.33984014738674e-17	2	PLCE1
SLC40A1	7.86881442284723e-22	0.407628543547607	0.845	0.551	2.28533977282752e-17	2	SLC40A1
MUC13	8.28628246202635e-22	0.692451225556695	0.781	0.494	2.40658501544631e-17	2	MUC13
VIL1	3.45249019403744e-21	0.257221569978689	0.482	0.213	1.00270672705429e-16	2	VIL1
USP18	1.10802965903248e-20	0.316025429249413	0.554	0.281	3.21805053872803e-16	2	USP18
RNASE4	1.65734344283217e-20	0.472343433060061	0.709	0.417	4.81342256101748e-16	2	RNASE4
RNASEK	2.30382847576037e-20	0.494574989247375	0.996	1	6.69100904215085e-16	2	RNASEK
SLC7A2	3.47776574366354e-20	0.343429372622394	0.993	0.907	1.0100475049322e-15	2	SLC7A2
MTND4P24	1.7207421487048e-19	0.376987433581917	0.543	0.291	4.99755142248336e-15	2	MTND4P24
HLA-B	3.36638922990501e-19	0.558351689673491	0.993	0.937	9.77700424041312e-15	2	HLA-B
RGS41	5.55283486046988e-19	0.629537219989639	0.928	0.713	1.61270982852627e-14	2	RGS4
PDZK1	9.90046871871844e-19	0.299320958830529	0.655	0.364	2.8753931299774e-14	2	PDZK1
COX8A	1.19810669754857e-18	0.456917176174643	0.989	0.966	3.4796612816903e-14	2	COX8A
PLIN2	5.94069153856744e-18	0.510383967580441	0.597	0.343	1.72535504354614e-13	2	PLIN2
SLC38A41	3.82358736736665e-17	0.294916164421525	0.96	0.733	1.11048447910429e-12	2	SLC38A4
NR0B2	5.50364577311184e-16	0.362986133776362	0.421	0.193	1.59842384188487e-11	2	NR0B2
LDHA	5.9364400004615e-16	0.583322552432634	0.763	0.56	1.72412026933403e-11	2	LDHA
GLB1	7.5925547034305e-16	0.29837712177432	0.799	0.564	2.20510566251732e-11	2	GLB1
EZR	1.41707467415583e-15	0.409915256259933	0.989	0.94	4.11560997615077e-11	2	EZR
ETFDH	1.97545072699428e-15	0.530608836116848	0.817	0.642	5.73730154640948e-11	2	ETFDH
HLA-A1	5.53615520835507e-15	0.462623890513929	0.996	0.987	1.60786555716256e-10	2	HLA-A
ANXA4	1.80754893155347e-14	0.275535494008081	0.759	0.518	5.24966436191073e-10	2	ANXA4
MNF1	2.72164020208832e-14	0.314867528942961	0.978	0.859	7.90445963892512e-10	2	MNF1
BSCL2	2.90081051304243e-14	0.544111667884121	0.953	0.834	8.42482397302912e-10	2	BSCL2
NPC2	3.49416276493372e-14	0.418765030629806	0.989	0.966	1.0148096918197e-09	2	NPC2
ARPC1B	5.58591216018908e-14	0.267619079001306	0.781	0.573	1.62231646868371e-09	2	ARPC1B
CD99L2	6.39124130795855e-14	0.28586843854323	0.82	0.601	1.8562082130704e-09	2	CD99L2
S100A10	1.23441823921226e-13	0.298963024224287	0.745	0.52	3.58512089214416e-09	2	S100A10
SERPINA6	1.44262535517688e-13	0.37496196480356	0.353	0.162	4.18981681904022e-09	2	SERPINA6
SPTSSB1	1.88620241283868e-13	0.305635294915201	0.594	0.363	5.47809766760739e-09	2	SPTSSB
FXYD51	2.84853971906629e-13	0.445601029813676	0.856	0.612	8.27301390608422e-09	2	FXYD5
SERPINI1	5.409713325679e-13	0.474685795919024	0.73	0.526	1.57114304117695e-08	2	SERPINI1
SERPINA11	7.37192693660094e-13	0.375163151073144	0.86	0.663	2.14102874019701e-08	2	SERPINA1
HIGD1A	8.53603842952008e-13	0.370526961881512	0.971	0.845	2.47912164108552e-08	2	HIGD1A
ITGB1	1.13644401277122e-12	0.339861532316022	1	0.955	3.30057434629145e-08	2	ITGB1
GDF15	1.16130018940656e-12	0.305945599328455	0.281	0.12	3.37276414009346e-08	2	GDF15
SLC25A5	1.18952003433872e-12	0.4902249091215	0.978	0.926	3.45472303572995e-08	2	SLC25A5
BLVRB	1.71103734588513e-12	0.301212207043023	0.619	0.395	4.9693657636542e-08	2	BLVRB
FXYD6	2.39233507176166e-12	0.358582257182681	0.82	0.609	6.94805874891739e-08	2	FXYD6
BNIP3	2.70111587446906e-12	0.354874277997248	0.903	0.763	7.8448508342205e-08	2	BNIP3
TMSB4X	2.97694696524252e-12	0.297739049104254	0.978	0.899	8.64594707115384e-08	2	TMSB4X
SSR2	4.30203098218642e-12	0.545073315058754	0.95	0.841	1.2494388581564e-07	2	SSR2
GPX31	4.90253550845913e-12	0.47552218975661	0.975	0.897	1.42384338772179e-07	2	GPX3
AGT	8.86861618841581e-12	0.306304182828399	0.489	0.289	2.5757121996016e-07	2	AGT
CD164	9.73889888273316e-12	0.455107217284565	0.986	0.963	2.82846840251219e-07	2	CD164
GPR119	3.69586123253901e-11	0.34040069779998	0.381	0.201	1.0733889777663e-06	2	GPR119
CTSA	4.32376316451737e-11	0.271076823419007	0.917	0.795	1.25575053587078e-06	2	CTSA
SPINT2	1.08398249488765e-10	0.344970694269672	0.989	0.978	3.14821035990221e-06	2	SPINT2
C15orf48	2.02365327131657e-10	0.287589970878408	0.903	0.738	5.87729619588472e-06	2	C15orf48
PLK2	2.83501495705902e-10	0.281066968381285	0.86	0.678	8.23373393978652e-06	2	PLK2
TUBA1B	4.27978437531967e-10	0.545029196740829	0.989	0.994	1.24297777612409e-05	2	TUBA1B
GCG1	4.31856532575031e-10	0.542588716540552	0.996	0.994	1.25424092755766e-05	2	GCG
ATP6V0B1	4.35517699890674e-10	0.303119650200673	0.989	0.983	1.26487405579249e-05	2	ATP6V0B
TPP1	5.83084673554987e-10	0.255466783866052	0.888	0.777	1.69345281740575e-05	2	TPP1
FAM213A	6.49007300587537e-10	0.25532852062035	0.957	0.857	1.88491190309638e-05	2	FAM213A
NEU1	8.04445155871628e-10	0.286253106396725	0.795	0.633	2.33635006619797e-05	2	NEU1
NAA201	1.07458515364364e-09	0.365863156452985	0.993	0.966	3.12091766172723e-05	2	NAA20
PCSK21	1.08374858264845e-09	0.322252118968495	0.989	0.972	3.14753100858589e-05	2	PCSK2
PPIB	1.12338609672826e-09	0.467517685447831	0.975	0.952	3.26265024072788e-05	2	PPIB
PEF1	1.17061557068539e-09	0.293887168598409	0.558	0.38	3.39981880194157e-05	2	PEF1
FAM3B	1.3586256437135e-09	0.25037808851	0.579	0.394	3.94585645703712e-05	2	FAM3B
NDUFA1	1.70090688503745e-09	0.304583541130962	1	0.986	4.93994386621427e-05	2	NDUFA1
TMED3	1.72004760134658e-09	0.29576745278667	0.91	0.753	4.99553424859088e-05	2	TMED3
PDK41	3.6777302306509e-09	0.635046653072561	0.838	0.706	0.000106812319088794	2	PDK4
MPC2	4.45850081990071e-09	0.295413181814379	0.975	0.901	0.000129488239312376	2	MPC2
CHGB1	5.44618861649694e-09	0.388921965585115	1	1	0.000158173655988921	2	CHGB
NDUFA13	6.00988141431332e-09	0.258565245769292	0.993	0.995	0.000174544985915902	2	NDUFA13
FAM96B	8.08487300813009e-09	0.299155374116217	0.906	0.781	0.000234808966775122	2	FAM96B
C14orf1	8.15639486033759e-09	0.256987452161886	0.809	0.621	0.000236886175928785	2	C14orf1
MOB1B	1.15526341456615e-08	0.252530152644696	0.986	0.923	0.000335523153492447	2	MOB1B
BLOC1S1	1.65566955981678e-08	0.314951709028078	0.899	0.796	0.000480856110257587	2	BLOC1S1
ERGIC3	3.34455257641248e-08	0.306706175961563	0.867	0.752	0.000971358404767477	2	ERGIC3
CUTA	4.33410403812598e-08	0.276615798392873	0.971	0.961	0.00125875383579293	2	CUTA
PIGT	6.08273463880833e-08	0.258142941842714	0.892	0.747	0.0017666086211491	2	PIGT
ASAH11	6.51405308723025e-08	0.279229684811055	0.986	0.91	0.00189187643812428	2	ASAH1
ATRAID	6.6056156963812e-08	0.313777351948198	0.975	0.916	0.00191846896669999	2	ATRAID
UCP2	9.30308987440482e-08	0.449078531088488	0.428	0.28	0.00270189639222339	2	UCP2
ITM2B	1.68135664981555e-07	0.300888505029986	1	0.999	0.00488316411805931	2	ITM2B
PLEKHB2	2.24472745772855e-07	0.300400521715223	0.896	0.79	0.00651936195548102	2	PLEKHB2
TUBB	2.75591722734216e-07	0.254493512133611	0.932	0.879	0.00800401040336982	2	TUBB
VPS25	3.03588414454715e-07	0.326321403896707	0.637	0.477	0.00881711832100828	2	VPS25
NGFRAP1	5.22605881240948e-07	0.28673333050789	0.993	0.987	0.0151780426088809	2	NGFRAP1
GSTP1	6.91384403221391e-07	0.308848365089357	0.932	0.851	0.0200798772227589	2	GSTP1
TMEM60	8.42747554122241e-07	0.270575112466399	0.809	0.652	0.0244759172143722	2	TMEM60
CFC1	9.29710684759218e-07	0.518066964530879	0.946	0.881	0.027001587417462	2	CFC1
UQCRH	2.60055940174306e-06	0.253960294404445	0.924	0.843	0.0755280467048238	2	UQCRH
FDPS	2.74308338272394e-06	0.268705963848914	0.831	0.686	0.0796673706844514	2	FDPS
SCG2	2.89109875495653e-06	0.256940986500833	0.996	0.994	0.0839661811402024	2	SCG2
COX6B1	2.93957698542352e-06	0.2999923188931	0.989	0.949	0.0853741343876553	2	COX6B1
FDFT1	1.41540430458272e-05	0.261404849666405	0.928	0.869	0.411075872179961	2	FDFT1
PSME2	2.04729344746667e-05	0.267852851004884	0.849	0.753	0.594595435947744	2	PSME2
PRDX21	2.39630534910531e-05	0.266720504718044	0.986	0.974	0.695958962540655	2	PRDX2
PEMT	2.7003359109327e-05	0.278274666616773	0.964	0.926	0.784258558612185	2	PEMT
ACAT2	2.7234936629902e-05	0.340980608081327	0.612	0.502	0.790984264542243	2	ACAT2
ATP5B1	7.45305690254622e-05	0.338950106722653	0.986	0.966	1	2	ATP5B
ATF41	0.000269224340106131	0.286223760119049	0.867	0.786	1	2	ATF4
LOC100128906	0.00120382380717295	0.507775493497002	0.583	0.516	1	2	LOC100128906
HSP90B1	0.00171261117968752	0.326988320433145	0.989	0.972	1	2	HSP90B1
CXCL2	1.8186990806289e-35	1.09220725553887	0.366	0.059	5.28204773987052e-31	3	CXCL2
CXCL1	2.70564875681972e-33	1.04717450727213	0.328	0.049	7.8580156844315e-29	3	CXCL1
TGM2	3.16129879268466e-30	0.382204061164137	0.433	0.096	9.18136008359405e-26	3	TGM2
IL8	9.08439788291263e-30	1.34447961223196	0.403	0.091	2.63838167713432e-25	3	IL8
NEDD9	5.09258152307025e-28	0.360879086698777	0.761	0.343	1.47903845174529e-23	3	NEDD9
LDHA1	5.68428085251448e-28	1.14498347843954	0.94	0.564	1.65088568799578e-23	3	LDHA
INHBA	6.99916597394809e-27	0.523534122487081	0.687	0.28	2.03276777381374e-22	3	INHBA
NNMT	2.69216090145773e-26	0.863725311210591	0.485	0.138	7.81884290610367e-22	3	NNMT
B2M1	3.91635739186036e-26	0.628980260147289	1	1	1.137427677318e-21	3	B2M
ZFP36	4.88801983785882e-26	0.902668911604771	0.933	0.629	1.41962760150934e-21	3	ZFP36
VGF	1.12009327710218e-25	0.460484635615253	1	0.795	3.25308690468785e-21	3	VGF
APOH1	1.21181867631004e-25	0.821028777443706	0.813	0.384	3.51948498160726e-21	3	APOH
CLU2	2.16690013446368e-24	0.751215356436274	1	0.986	6.29332806052287e-20	3	CLU
NFKBIA	5.27827177064775e-24	1.06890070383216	0.821	0.49	1.53296847034923e-19	3	NFKBIA
CTSS	6.04030442043683e-24	0.303475727986014	0.433	0.125	1.75428561282747e-19	3	CTSS
LMCD1	2.2209940651237e-23	0.384440788815061	0.612	0.232	6.45043306333876e-19	3	LMCD1
ELL21	5.30446808259393e-23	0.774412501831749	1	0.937	1.54057666522775e-18	3	ELL2
IFITM2	1.72950518850245e-22	0.711549800366216	0.373	0.096	5.02300191896766e-18	3	IFITM2
TMEM176B2	5.43354481597925e-22	0.829699831791891	0.993	0.848	1.57806442090485e-17	3	TMEM176B
KLF6	7.59960987737395e-22	0.834336675043054	0.955	0.844	2.20715469668572e-17	3	KLF6
SPINK1	1.40939663544285e-21	1.69066726750224	0.806	0.435	4.09331064831668e-17	3	SPINK1
TTR2	1.05685282922341e-20	0.786772560252684	1	0.999	3.06941767191356e-16	3	TTR
GAPDHP1	8.83730245620557e-20	0.468635400739202	0.866	0.653	2.56661775235578e-15	3	GAPDHP1
HIST1H2BC	3.09033167032728e-19	0.693772852958705	0.56	0.229	8.97525027013153e-15	3	HIST1H2BC
MALAT1	3.10537318960905e-18	0.566857890770607	1	1	9.01893535458156e-14	3	MALAT1
IFITM3	4.09764085698053e-18	0.519129834538295	0.425	0.151	1.19007783409285e-13	3	IFITM3
SMOC1	4.10742150073561e-18	0.281886015570274	0.813	0.456	1.19291842645864e-13	3	SMOC1
HIST2H2AA4	5.62930438990361e-18	0.417878054556055	0.642	0.297	1.6349188739597e-13	3	HIST2H2AA4
SPOCK3	1.06916747643959e-17	0.257615620137078	0.724	0.362	3.10518310182351e-13	3	SPOCK3
FXYD52	2.52284161903941e-17	0.689384053591924	0.963	0.628	7.32708891417617e-13	3	FXYD5
PER2	3.18627616752696e-17	0.663126474157128	0.91	0.767	9.25390187334855e-13	3	PER2
MUC131	3.51472180382183e-17	0.653068676038181	0.836	0.519	1.02078065348397e-12	3	MUC13
HIST2H2AA3	3.76250979562104e-17	0.333995877480481	0.634	0.3	1.09274571994222e-12	3	HIST2H2AA3
CP	4.99214207689574e-17	0.461546737356842	0.44	0.177	1.44986782339283e-12	3	CP
TMEM45B	9.54891900226938e-17	0.556663218600223	0.672	0.33	2.7732925458291e-12	3	TMEM45B
NFKBIZ	1.1164666155178e-16	0.417773156664017	0.754	0.434	3.24255399144835e-12	3	NFKBIZ
VIM	1.31731943159808e-16	0.621777761527938	0.694	0.393	3.82589082519032e-12	3	VIM
PALLD	1.84255274518895e-16	0.414727723091301	0.94	0.661	5.35132593785227e-12	3	PALLD
FXYD3	2.04104793306354e-16	0.30837750131628	0.866	0.574	5.92781551199645e-12	3	FXYD3
SERPINA12	1.53989009747406e-15	1.33077542154293	0.866	0.684	4.47230281009393e-11	3	SERPINA1
GC2	2.22569487785013e-15	0.741123837827785	0.985	0.684	6.46408563374012e-11	3	GC
RGS42	4.17361385232715e-15	0.547102416507223	0.993	0.729	1.21214267113137e-10	3	RGS4
LINC00312	5.21977405682863e-15	0.284699132924552	0.254	0.064	1.51597897932474e-10	3	LINC00312
REG1A	7.2559296753956e-15	0.530759622676028	0.627	0.341	2.10733965562514e-10	3	REG1A
HIST1H2BK	7.3036563277804e-15	0.632300839129882	0.53	0.244	2.12120090727726e-10	3	HIST1H2BK
ELF3	7.85207606273105e-15	0.388051895869608	0.836	0.534	2.28047845089898e-10	3	ELF3
HLA-E1	9.06637838048709e-15	0.615245109145536	0.993	0.837	2.63314827304486e-10	3	HLA-E
KCTD121	9.07845906290569e-15	0.390861102971812	0.948	0.675	2.6366568656397e-10	3	KCTD12
CYSTM11	9.82157431981587e-15	0.577540287403717	1	0.974	2.85247982970412e-10	3	CYSTM1
PTP4A1	9.9395502968999e-15	0.598767395692704	0.955	0.817	2.88674359272864e-10	3	PTP4A1
HLA-A2	1.41697076251886e-14	0.663405796759085	1	0.987	4.11530818558353e-10	3	HLA-A
HES1	1.51998299622775e-14	0.331897911645078	0.769	0.51	4.41448661594424e-10	3	HES1
S100A101	1.83115101150833e-14	0.559967038521268	0.851	0.534	5.31821188272365e-10	3	S100A10
LAPTM4B	2.023870946522e-14	0.480361542370209	0.896	0.651	5.87792838998384e-10	3	LAPTM4B
MBOAT4	2.75045532774945e-14	0.350591336148599	0.552	0.266	7.98814740838274e-10	3	MBOAT4
HLA-B1	3.16635280025638e-14	0.593082469979376	1	0.942	9.19603843778461e-10	3	HLA-B
F101	8.73624041439894e-14	0.435472383066796	0.799	0.497	2.53726630355389e-09	3	F10
FABP5P71	2.21624744023205e-13	0.521391546106132	0.843	0.585	6.43664744066594e-09	3	FABP5P7
TMSB4X1	3.26533063638442e-13	0.804557817738789	0.993	0.906	9.48349976725128e-09	3	TMSB4X
HIST1H1C	3.3669518363448e-13	0.583396312366774	0.724	0.463	9.77863821829619e-09	3	HIST1H1C
NPNT	4.06719796072336e-13	0.293034684128485	0.791	0.466	1.18123630373289e-08	3	NPNT
FABP5P11	5.30391998324663e-13	0.253157601525646	0.791	0.516	1.54041748073432e-08	3	FABP5P1
CFB	6.27437318287042e-13	0.355854837149717	0.313	0.111	1.82226620350106e-08	3	CFB
CD74	8.37736397609917e-13	0.25259437966586	0.522	0.252	2.43303781957848e-08	3	CD74
TMEM176A1	1.19199825611642e-12	0.566152737675556	0.963	0.731	3.4619205352389e-08	3	TMEM176A
CDH10	1.51311445321027e-12	0.299059482187137	0.642	0.362	4.3945383064586e-08	3	CDH10
HLA-C	2.04074456319985e-12	0.438648974270608	1	0.931	5.92693443490132e-08	3	HLA-C
RAP2B	2.06761005830397e-12	0.495508570698194	0.933	0.788	6.00495989233223e-08	3	RAP2B
C2CD4A	3.44060418464941e-12	0.254657062236443	0.619	0.347	9.99254673347729e-08	3	C2CD4A
PRSS3	4.62032897016262e-12	0.403959889852752	0.515	0.244	1.34188214280433e-07	3	PRSS3
SLC40A11	8.15515280030189e-12	0.494388843665519	0.873	0.58	2.36850102779168e-07	3	SLC40A1
ITGB11	1.26184421764079e-11	0.487197021083585	0.993	0.96	3.66477416129413e-07	3	ITGB1
NAMPT	1.61666198059706e-11	0.488211344620053	0.836	0.606	4.69527139024804e-07	3	NAMPT
FAP2	1.95877802312383e-11	0.350786168982514	0.948	0.614	5.68887901255855e-07	3	FAP
SOD2	2.4896582519442e-11	1.27152771910931	0.806	0.605	7.23071446112154e-07	3	SOD2
HSPB1	2.93710560155165e-11	0.299054335854859	0.813	0.602	8.53023579858645e-07	3	HSPB1
TM4SF1	3.40164057180787e-11	0.620334893155702	0.537	0.283	9.8793847127016e-07	3	TM4SF1
C19orf772	3.8473780167258e-11	0.481112662906534	0.888	0.603	1.11739399739768e-06	3	C19orf77
RHOB	4.04077889078236e-11	0.349236178749444	0.881	0.706	1.17356341324992e-06	3	RHOB
C11orf93	8.37925633684058e-11	0.350261899778774	0.485	0.235	2.43358741790861e-06	3	C11orf93
PSME21	1.01889313077178e-10	0.541057537988998	0.933	0.755	2.95917131970048e-06	3	PSME2
ALDH1A12	2.08588957403577e-10	0.498793535957729	1	0.99	6.05804908987208e-06	3	ALDH1A1
SLC38A42	2.70368668628421e-10	0.382624835031709	0.97	0.756	7.85231724297522e-06	3	SLC38A4
GNG5	4.90576563841475e-10	0.511888590184469	0.918	0.783	1.4247815143648e-05	3	GNG5
TIMP1	7.46563594338635e-10	0.4157569936479	1	0.964	2.1682446470377e-05	3	TIMP1
FABP51	9.3232343066185e-10	0.374353906804481	0.851	0.585	2.70774693967121e-05	3	FABP5
CACNB2	1.00548867280338e-09	0.379606573552624	0.91	0.709	2.92024075242286e-05	3	CACNB2
BTG1	1.42626179809314e-09	0.357181328151181	0.94	0.839	4.1422921402019e-05	3	BTG1
HIGD1A1	2.22178329893604e-09	0.476323451332657	0.955	0.86	6.45272523509995e-05	3	HIGD1A
GLRX	2.30137497255703e-09	0.282242586403784	0.59	0.327	6.68388333279739e-05	3	GLRX
TAPBP	4.82517682122919e-09	0.505806735835486	0.985	0.923	0.000140137610418959	3	TAPBP
EZR1	5.35366486272781e-09	0.439451726702676	0.993	0.945	0.000155486488608204	3	EZR
GCH1	9.90355583368385e-09	0.414159436790401	0.94	0.814	0.00028762897207768	3	GCH1
SIL1	1.0865142832961e-08	0.36303281057042	0.896	0.707	0.000315556343297686	3	SIL1
S100A11	1.36238979938061e-08	0.674857723726474	0.903	0.8	0.000395678869434111	3	S100A11
GPX32	3.78710490665226e-08	0.418691278303712	1	0.903	0.00109988887803902	3	GPX3
PDK42	3.92090396528766e-08	0.828498313482006	0.881	0.716	0.00113874813863849	3	PDK4
LOC1001289061	4.26054396932676e-08	0.255554497645958	0.761	0.505	0.00123738978501157	3	LOC100128906
ATP1B1	4.41312280326134e-08	0.58074186500089	1	0.981	0.00128170325575119	3	ATP1B1
H3F3B	5.3539646800043e-08	0.671680681540126	1	0.998	0.00155495196201365	3	H3F3B
KLF101	5.40437197459881e-08	0.348891322135354	0.896	0.718	0.00156959175258273	3	KLF10
HIST1H1E	5.81193708543233e-08	0.314240823474437	0.903	0.775	0.00168796088772211	3	HIST1H1E
ELMSAN1	5.9560493685335e-08	0.421710831080215	0.784	0.631	0.00172981541810318	3	ELMSAN1
SLC7A21	7.85475645513619e-08	0.365626094767805	0.993	0.916	0.0022812569172652	3	SLC7A2
TES	8.41735242105628e-08	0.277526630966482	0.731	0.503	0.00244465166364737	3	TES
CRYBA22	8.93629101381054e-08	0.442611465516904	0.858	0.688	0.002595366999141	3	CRYBA2
BTG2	1.19433888911211e-07	0.335765053832471	0.97	0.841	0.0034687184356483	3	BTG2
EDIL3	1.48515115447789e-07	0.252306553534937	0.918	0.713	0.00431332449795012	3	EDIL3
HNRNPDL	1.48680108248216e-07	0.270864298104698	0.985	0.968	0.00431811638385294	3	HNRNPDL
SAT1	1.50230790334623e-07	0.54987797461036	0.948	0.817	0.00436315284368846	3	SAT1
SCG21	3.02731278874285e-07	0.412507577718588	1	0.994	0.00879222453234585	3	SCG2
NR4A2	3.42555476838262e-07	0.32754379058058	0.642	0.462	0.00994883871381364	3	NR4A2
CPNE81	3.46677403604659e-07	0.318266196285254	0.843	0.668	0.0100685518328901	3	CPNE8
BSG	3.48660465007101e-07	0.31740044168679	0.985	0.957	0.0101261458852012	3	BSG
SH3BGRL3	4.00674536443792e-07	0.376751417794847	0.94	0.825	0.011636790561937	3	SH3BGRL3
ANXA41	4.26351023928266e-07	0.340570687149822	0.731	0.547	0.0123825127879486	3	ANXA4
PAPSS21	4.67382516465815e-07	0.383376930327387	0.985	0.932	0.0135741904257167	3	PAPSS2
CNN3	6.01371998628855e-07	0.310619395864404	0.709	0.536	0.0174656469561778	3	CNN3
CHGA	6.76642311002825e-07	0.445546897425009	0.993	0.984	0.0196517226384551	3	CHGA
IFI27L2	8.6990401104753e-07	0.447629801093096	0.888	0.783	0.0252646221928534	3	IFI27L2
TM4SF42	9.40547703663557e-07	0.403746104075245	0.993	0.824	0.0273163269575007	3	TM4SF4
SLC36A4	1.07273361988939e-06	0.26143807351116	0.821	0.643	0.0311554025224476	3	SLC36A4
CALM3	1.11078037447804e-06	0.258005623889579	0.925	0.833	0.0322603944159656	3	CALM3
SPINT21	1.1663301197631e-06	0.293505490497855	1	0.978	0.0338737256682798	3	SPINT2
CASP4	1.30873351544804e-06	0.266548626503452	0.299	0.143	0.0380095474891574	3	CASP4
COX8A1	1.39796200677728e-06	0.341363267777053	0.985	0.969	0.0406010105628325	3	COX8A
CPNE3	2.30982308683779e-06	0.338948070069161	0.993	0.932	0.0670841919110299	3	CPNE3
RN7SK	2.37268307355703e-06	0.79277771896185	0.567	0.372	0.0689098345053167	3	RN7SK
LSM2	2.41025502288989e-06	0.266575287581212	0.731	0.549	0.0700010366297909	3	LSM2
MYL6	2.90078288054998e-06	0.262970933477843	1	0.999	0.0842474371998132	3	MYL6
SNRPB	3.29918518386566e-06	0.333014858865454	0.821	0.661	0.0958182352950105	3	SNRPB
PLSCR1	3.47438495462221e-06	0.294351865814886	0.642	0.449	0.100906562237093	3	PLSCR1
TMEM256	3.82700074365983e-06	0.326413537686959	0.694	0.499	0.111147582598113	3	TMEM256
GCNT3	4.81121037637383e-06	0.25538625753243	0.313	0.157	0.139731982961025	3	GCNT3
LOXL42	5.52810949626474e-06	0.428084948714228	0.709	0.534	0.160552884100017	3	LOXL4
DNAJC121	5.97538628897404e-06	0.454649417574305	0.903	0.82	0.173543143990673	3	DNAJC12
ERRFI1	6.49262627809009e-06	0.267551659459024	0.627	0.433	0.18856534499457	3	ERRFI1
FAM46A	8.74062968101895e-06	0.261633544233742	0.94	0.826	0.253854107825833	3	FAM46A
SQRDL	9.22611670435443e-06	0.251599610624398	0.455	0.286	0.267954107444566	3	SQRDL
GCG2	1.12598653718724e-05	0.514874543036852	1	0.994	0.327020269995289	3	GCG
DCTPP1	1.34203802872385e-05	0.272710796729593	0.425	0.259	0.389768104682267	3	DCTPP1
CALR	1.34239439039151e-05	0.544102011407564	1	0.997	0.389871602801405	3	CALR
IFI6	1.84672868704801e-05	0.351113145824363	0.993	0.974	0.536345412579355	3	IFI6
COPZ1	2.11073509695543e-05	0.306201384510986	0.948	0.892	0.613020794208766	3	COPZ1
TUBA1B1	2.14673564934089e-05	0.337510769970709	1	0.993	0.623476434638075	3	TUBA1B
ANXA2	2.75785053670263e-05	0.320340641377334	0.955	0.806	0.800962531374545	3	ANXA2
ZNF331	2.79243981573867e-05	0.499051526509027	0.694	0.59	0.811008295684981	3	ZNF331
PPIB1	3.50415507937566e-05	0.31481693176974	0.985	0.954	1	3	PPIB
WTAP1	3.8377473305603e-05	0.329744092641569	0.993	0.972	1	3	WTAP
YWHAE1	5.05765882808532e-05	0.327805518986489	1	0.999	1	3	YWHAE
SUMF2	6.05273369640764e-05	0.288733907515709	1	0.985	1	3	SUMF2
SSR21	9.05159125722315e-05	0.259277550009192	0.955	0.852	1	3	SSR2
DUSP1	0.000106539905271125	0.575006202869629	0.866	0.815	1	3	DUSP1
ETV6	0.000138981504397951	0.285860334008126	0.522	0.404	1	3	ETV6
SNRPG	0.000211373536680568	0.301881649174325	0.97	0.954	1	3	SNRPG
YWHAH	0.000219756506814141	0.343623535711114	0.963	0.931	1	3	YWHAH
ITGB8	0.000225046101884533	0.269416929478139	0.619	0.493	1	3	ITGB8
CAPZA11	0.000244267900825126	0.317282061918985	1	0.984	1	3	CAPZA1
CTSB	0.000250604785001381	0.296317934446746	0.985	0.943	1	3	CTSB
CLIC1	0.00026983965960497	0.293893539386269	0.881	0.792	1	3	CLIC1
HIST1H2AC	0.000271808807276712	0.306802941939964	0.358	0.23	1	3	HIST1H2AC
SCGB2A1	0.000354570366681993	0.342196902387926	0.948	0.86	1	3	SCGB2A1
SHFM1	0.000664337986314404	0.250669967833985	0.993	0.976	1	3	SHFM1
QDPR	0.000681919644483498	0.303768790151961	0.873	0.768	1	3	QDPR
PPP1R14C	0.000911796918503457	0.300493898621627	0.493	0.359	1	3	PPP1R14C
PDIA3	0.00168914656408327	0.259639785609552	0.978	0.961	1	3	PDIA3
FKBP2	0.00218728170570089	0.256231271354336	0.978	0.958	1	3	FKBP2
CTNNB11	0.0024629810335092	0.251679137071883	1	0.999	1	3	CTNNB1
DPM3	0.00264513222801606	0.327401920190691	0.903	0.843	1	3	DPM3
ACTB1	0.00445956492944108	0.279894438465947	1	1	1	3	ACTB
NDUFS4	0.00593397755276604	0.315584307734295	0.828	0.751	1	3	NDUFS4
FOS	0.00604726933129967	0.310404715632858	1	0.981	1	3	FOS
B4GALT1	0.00818622541326726	0.259741159744209	0.813	0.725	1	3	B4GALT1
RN7SL11	0.00911062521747732	0.481718076301681	0.627	0.562	1	3	RN7SL1
SLITRK6	1.65264243573707e-128	1.22937079270433	0.833	0.046	4.79976942611117e-124	4	SLITRK6
PTGFR	1.26215866396966e-107	0.502750307120641	0.444	0.006	3.66568740776708e-103	4	PTGFR
THSD7A	2.82184076270203e-95	0.444556596125079	0.806	0.067	8.19547212711551e-91	4	THSD7A
CHN2	1.31791046042405e-94	0.401279044627337	0.625	0.032	3.82760735020956e-90	4	CHN2
CALB1	1.07684837505778e-86	1.19783331584051	0.597	0.034	3.12749073568032e-82	4	CALB1
PCDH10	9.04866290061463e-83	0.31333273916408	0.708	0.056	2.62800316622551e-78	4	PCDH10
TMEM47	2.90433533106416e-70	0.442992026311507	0.597	0.047	8.43506110200964e-66	4	TMEM47
CARTPT	4.1108369788327e-68	0.7617406933972	0.347	0.01	1.19391038376238e-63	4	CARTPT
PPY	7.85992956667219e-65	7.50874642099167	1	0.299	2.2827593440486e-60	4	PPY
CHRM3	1.89074869658039e-57	0.308051508446879	0.889	0.175	5.49130143947842e-53	4	CHRM3
SUCNR1	3.82539470659143e-54	1.09533730040581	0.306	0.011	1.11100938463535e-49	4	SUCNR1
DPYSL3	9.02882124910976e-53	0.319223423794313	0.667	0.085	2.62224055537895e-48	4	DPYSL3
SPOCK1	7.36917566878718e-50	0.592934998555486	0.597	0.076	2.14022968948586e-45	4	SPOCK1
AQP3	2.81114776414748e-49	1.5356631482092	0.694	0.116	8.16441645141354e-45	4	AQP3
AGTR1	4.0190645264794e-49	0.30875410530366	0.25	0.007	1.16725691042541e-44	4	AGTR1
CPVL	7.96382310082162e-49	0.683216563185383	0.319	0.016	2.31293314317163e-44	4	CPVL
LMO3	5.04605753179657e-46	0.313870464044812	0.389	0.029	1.46552648895968e-41	4	LMO3
SLC4A4	2.53866041131631e-45	0.34934366522035	0.694	0.13	7.37303143258597e-41	4	SLC4A4
LPHN2	6.28512469028057e-41	0.2863592930197	0.597	0.092	1.82538876379819e-36	4	LPHN2
CDH17	9.44902668659051e-39	0.400449869625158	0.361	0.031	2.74428082058648e-34	4	CDH17
MS4A8	1.08062942399121e-37	1.09172446520239	0.764	0.173	3.13847203609767e-33	4	MS4A8
SERTM1	1.97557285912798e-35	0.599898706927102	0.75	0.172	5.73765625476538e-31	4	SERTM1
ETV1	1.51906928915245e-32	0.827815522807297	1	0.553	4.41183293648546e-28	4	ETV1
PDE3A	4.0348697331072e-31	0.294260478347744	0.694	0.169	1.17184721658633e-26	4	PDE3A
TUBB2A1	2.29155196121998e-29	0.841324331348229	0.694	0.197	6.6553543609712e-25	4	TUBB2A
ID2	2.50308029343385e-29	2.51867201487159	0.986	0.649	7.26969609621994e-25	4	ID2
NDNF	2.03611592173921e-28	0.329411630071954	0.264	0.022	5.91349147150719e-24	4	NDNF
TNFRSF11B	2.91655640686368e-28	0.818947906053694	0.375	0.051	8.47055477245418e-24	4	TNFRSF11B
PXK	8.75394804107331e-28	0.955439966185923	0.833	0.302	2.54240912956892e-23	4	PXK
AKAP12	1.20498813752538e-26	0.577558338528025	0.889	0.396	3.49964704781496e-22	4	AKAP12
AHR	2.00817916165594e-26	0.2919160152194	0.625	0.154	5.83235473919735e-22	4	AHR
C14orf105	1.21181846483015e-24	0.382759079947366	0.444	0.085	3.51948436740621e-20	4	C14orf105
SEMA3E	1.27727731478225e-24	0.405199758453711	0.917	0.372	3.70959650532208e-20	4	SEMA3E
SLC6A4	2.43608075885349e-24	0.483509934372089	0.778	0.304	7.0751093479382e-20	4	SLC6A4
ATP61	2.87839636851373e-24	0.923740978539026	1	1	8.35972657307442e-20	4	ATP6
APOBEC21	3.36631527642664e-24	0.995274664305222	0.625	0.176	9.7767894573259e-20	4	APOBEC2
LOC1001289062	3.73741234085507e-24	1.44034563884103	0.972	0.506	1.08545666615454e-19	4	LOC100128906
TSPAN8	7.3927078529855e-24	1.1438498031547	0.486	0.107	2.14706414174258e-19	4	TSPAN8
PCDH9	1.96035559454205e-23	0.352860232549759	0.458	0.091	5.69346075322848e-19	4	PCDH9
LITAF	2.64752169270944e-23	0.355373298505488	0.486	0.105	7.68919725213603e-19	4	LITAF
FXYD21	3.57162407971634e-23	1.42860948242107	1	0.803	1.03730678147202e-18	4	FXYD2
TFPI	1.00488818285829e-22	0.558039839383242	0.542	0.14	2.91849674947534e-18	4	TFPI
GCNT31	7.50675208240581e-22	0.685260653717339	0.569	0.151	2.18018600729312e-17	4	GCNT3
ID1	1.2197866530353e-21	0.994405636051958	0.639	0.204	3.54262637641043e-17	4	ID1
LOC101927337	1.88052278655999e-21	0.393616223019871	0.986	0.996	5.46160232900618e-17	4	LOC101927337
CYTB1	2.46056279451881e-21	0.911606229539904	1	1	7.14621252412098e-17	4	CYTB
ABCC9	2.69448814117372e-20	0.337612661395028	0.931	0.507	7.82560190841083e-16	4	ABCC9
STMN2	5.83532442914662e-20	1.35687870553082	0.986	0.839	1.69475327395705e-15	4	STMN2
SAMD5	6.6568189302856e-20	0.499170262704055	0.889	0.429	1.93333992192285e-15	4	SAMD5
EHF	1.2146105317858e-19	1.09477900263476	0.889	0.484	3.52759336746549e-15	4	EHF
FXYD6-FXYD21	1.45272442556974e-19	1.16277375851355	1	0.864	4.21914754918221e-15	4	FXYD6-FXYD2
ABCB1	7.38100631572651e-19	0.43217654013503	0.847	0.4	2.14366566427645e-14	4	ABCB1
HGD	7.84145288796599e-19	0.829494698218338	0.722	0.279	2.27739316225196e-14	4	HGD
MEIS21	1.13600143079212e-18	1.01546257431028	0.972	0.784	3.29928895544955e-14	4	MEIS2
PRSS231	1.7216132090485e-18	0.576603850372187	0.875	0.395	5.00008124303955e-14	4	PRSS23
RPS27AP16	8.31076462887759e-18	0.380834286095841	0.986	0.885	2.41369537116492e-13	4	RPS27AP16
AK4	8.51105669497691e-18	0.342027344717118	0.444	0.11	2.47186619592215e-13	4	AK4
INPP5F	9.19690693249762e-18	0.601752524223841	0.833	0.428	2.67105768040528e-13	4	INPP5F
KCNJ8	2.51881979497289e-17	0.358724209965514	0.611	0.204	7.31540833053977e-13	4	KCNJ8
PEG10	3.77650496236936e-17	1.04758248676199	0.958	0.835	1.09681033622093e-12	4	PEG10
BPHL	4.31442375176648e-17	0.639892467622964	0.556	0.177	1.25303809022554e-12	4	BPHL
BTG21	4.37477417486231e-17	1.42206951681619	0.972	0.846	1.27056566360526e-12	4	BTG2
EEF1A1P13	1.22841511134556e-16	0.288632417624588	1	0.999	3.5676860078809e-12	4	EEF1A1P13
BHLHE411	1.23800718611369e-16	0.486756337663208	0.681	0.26	3.59554427062998e-12	4	BHLHE41
GLT8D2	1.69311519971853e-16	0.47522387006635	0.542	0.165	4.91731447454253e-12	4	GLT8D2
EGR3	1.76882234087097e-16	0.440454652931323	0.597	0.206	5.13719072459156e-12	4	EGR3
MLLT3	1.85627738056046e-16	0.478440190999509	0.847	0.409	5.39118639636174e-12	4	MLLT3
MTND1P23	2.04365443137791e-16	2.40341212806097	1	0.987	5.93538556505086e-12	4	MTND1P23
EEF1A1P9	2.04657027409912e-16	0.272524670564094	1	0.951	5.94385404706608e-12	4	EEF1A1P9
RPL3P4	5.00994983200735e-16	1.00761102336171	0.972	0.794	1.45503972970989e-11	4	RPL3P4
PLEKHB1	5.59038997307612e-16	0.363173007695162	0.472	0.131	1.6236169598805e-11	4	PLEKHB1
EEF1A1P11	1.01734614875775e-15	0.718154958987409	1	0.999	2.95467841983713e-11	4	EEF1A1P11
PAM	1.32387986647457e-15	0.974669776575585	1	0.984	3.84494429620209e-11	4	PAM
MIR4426	2.05971555425437e-15	0.432369606168454	0.833	0.423	5.98203188422095e-11	4	MIR4426
S100A102	6.89043537019592e-15	1.13748616181374	0.861	0.547	2.001189144566e-10	4	S100A10
SCGB2A11	8.72420299407314e-15	1.1410449734067	0.986	0.862	2.53377027556866e-10	4	SCGB2A1
SCG22	9.34601657242345e-15	0.856350444196654	1	0.994	2.71436359312894e-10	4	SCG2
ND61	9.66507477196859e-15	0.77819842376018	1	1	2.80702766602284e-10	4	ND6
CHGB2	1.16858128752643e-14	0.785317133595966	1	1	3.39391063336302e-10	4	CHGB
EEF1A1P6	1.24384272438845e-14	0.566293503712222	1	0.999	3.61249242444138e-10	4	EEF1A1P6
TRNS11	1.24799477974419e-14	1.03096936996336	0.958	0.995	3.62455123881106e-10	4	TRNS1
ID4	2.86427641017562e-14	0.998377912189525	0.917	0.612	8.31871797807304e-10	4	ID4
MMRN1	2.92923509921942e-14	0.251646022141761	0.681	0.276	8.50737749866295e-10	4	MMRN1
PAX61	3.30406845791374e-14	0.651563868604462	1	0.987	9.59600602231887e-10	4	PAX6
RALYL	4.40939058059311e-14	0.304525760171284	0.486	0.154	1.28061930632166e-09	4	RALYL
COX21	5.47192065286248e-14	0.573090848155163	1	1	1.58920991521085e-09	4	COX2
PBXIP1	7.0210031743951e-14	0.250606912546883	0.708	0.341	2.03910995193957e-09	4	PBXIP1
FGFR1	8.81895451852832e-14	0.553790258319944	0.972	0.719	2.56128896081618e-09	4	FGFR1
ND21	1.38956576759579e-13	0.567212084409242	1	1	4.03571585882844e-09	4	ND2
TRNE1	1.43989130588441e-13	0.78597568680774	1	0.968	4.1818763196801e-09	4	TRNE
MARCKSL1	2.68830803894244e-13	0.372043436926066	0.458	0.147	7.80765303750054e-09	4	MARCKSL1
PCSK1N	2.81103508289586e-13	0.442170619842051	1	0.959	8.16408919125444e-09	4	PCSK1N
PRKACB1	3.93199714154445e-13	0.538059913231543	0.931	0.626	1.14196992981875e-08	4	PRKACB
SEC11C1	4.66091579574226e-13	0.920781634963807	1	0.966	1.35366977455743e-08	4	SEC11C
ATP81	5.98249862329492e-13	0.618617279326521	1	1	1.73749707516354e-08	4	ATP8
ACSL1	6.29254277682592e-13	0.486321852488975	0.806	0.414	1.82754319867355e-08	4	ACSL1
VMP11	6.43242177815482e-13	1.23202240608221	0.958	0.721	1.86816825702951e-08	4	VMP1
ND51	7.82379633972099e-13	0.645315367925045	1	0.999	2.27226517094517e-08	4	ND5
CPB1	8.45737956483243e-13	1.13862984974066	0.444	0.157	2.45627674701428e-08	4	CPB1
C16orf45	1.02052590995188e-12	0.874360098372134	0.861	0.548	2.96391340027326e-08	4	C16orf45
SP100	1.11619388369714e-12	0.266248528501078	0.75	0.401	3.2417618964216e-08	4	SP100
ARX1	4.5234524820559e-12	0.678082791356768	0.917	0.574	1.3137463043635e-07	4	ARX
ITM2C	5.36668246855504e-12	0.824690858321904	0.931	0.709	1.55864558934244e-07	4	ITM2C
RAPGEF4	6.10611940378109e-12	0.377597490856204	0.528	0.219	1.77340025844014e-07	4	RAPGEF4
JUN	8.0189003583539e-12	0.552547616569564	0.917	0.736	2.32892923107672e-07	4	JUN
DDR1	9.14403196206703e-12	0.449503688530139	0.986	0.827	2.65570120274313e-07	4	DDR1
BMP51	1.15059242131753e-11	0.600537324773308	0.764	0.374	3.34166556923251e-07	4	BMP5
MTND4P12	1.56613469736772e-11	0.569271573753451	0.958	0.789	4.54852500156508e-07	4	MTND4P12
EGR1	1.9134200802212e-11	0.687553551735188	1	0.986	5.55714593898643e-07	4	EGR1
RPS3AP6	1.97796527002458e-11	0.380970403454294	1	0.996	5.74460453373238e-07	4	RPS3AP6
MTRNR2L12	2.36296213567355e-11	0.306637110483066	0.958	0.926	6.8627509306367e-07	4	MTRNR2L12
MALAT11	3.52166074501574e-11	0.941573908562392	1	1	1.02279593017492e-06	4	MALAT1
CRIP2	4.68312119324318e-11	0.680082762497232	0.889	0.735	1.36011888815362e-06	4	CRIP2
DEPTOR	4.76080889679393e-11	0.431278498335314	0.5	0.194	1.38268172789586e-06	4	DEPTOR
MIR1282	8.57643787684291e-11	0.329163380407086	0.861	0.512	2.49085485257149e-06	4	MIR1282
TRNC	8.63010899796911e-11	0.885030247883143	0.875	0.764	2.50644255628017e-06	4	TRNC
RPS3AP47	2.15859018181161e-10	0.307231822987481	1	0.96	6.26919346503546e-06	4	RPS3AP47
MTND4P241	2.25943998018119e-10	1.01833294150748	0.597	0.325	6.56209153444022e-06	4	MTND4P24
COX31	3.45925193336937e-10	0.499150389651876	1	1	1.00467053900847e-05	4	COX3
RPL10P6	7.36068383813455e-10	0.298819494321683	0.986	0.98	2.13776340710942e-05	4	RPL10P6
TRNN1	7.96705826800257e-10	0.77502836777568	0.958	0.956	2.31387273277599e-05	4	TRNN
RPS3AP5	1.28831292499126e-09	0.266615474985147	0.972	0.991	3.74164722805211e-05	4	RPS3AP5
IER2	1.33160786932926e-09	0.426242820312464	0.625	0.364	3.86738873489298e-05	4	IER2
DIRAS3	1.33822861402196e-09	0.787732077115166	0.597	0.31	3.88661736370397e-05	4	DIRAS3
CMTM8	1.50701393184143e-09	0.518179718699009	0.778	0.491	4.37682056224707e-05	4	CMTM8
SORD	2.2050080267046e-09	0.497986913275893	0.639	0.321	6.40400481195817e-05	4	SORD
APLP1	3.24953053890964e-09	0.369773018798375	1	0.865	9.43761154415527e-05	4	APLP1
FOS1	3.32904730925267e-09	0.811796291822168	1	0.982	9.66855210026253e-05	4	FOS
RNR11	3.84805993410007e-09	0.525200192847668	1	1	0.000111759204666068	4	RNR1
ARHGEF31	5.17971344555248e-09	0.553939059167677	0.667	0.393	0.000150434417599181	4	ARHGEF3
MEIS11	6.52404195609723e-09	0.639412366073601	0.917	0.669	0.000189477750530932	4	MEIS1
SPPL2A	6.57537133941958e-09	0.678693380996928	0.625	0.328	0.000190968509810763	4	SPPL2A
ID31	1.04172576077508e-08	0.387088086949966	0.458	0.183	0.000302548412701906	4	ID3
PBX3	1.11334541326456e-08	0.743969259137725	0.694	0.419	0.000323348908374425	4	PBX3
WWP1	1.41564788082572e-08	0.316521007827952	0.611	0.31	0.000411146614028215	4	WWP1
DSG2	1.75995826010496e-08	0.444152915120787	0.792	0.515	0.000511144677482285	4	DSG2
MFSD6	1.77733818878864e-08	0.329654574905107	0.75	0.477	0.000516192330169885	4	MFSD6
TRNY1	1.83576934028001e-08	0.803071211256536	0.931	0.962	0.000533162489497523	4	TRNY
RPL10P16	1.956022626388e-08	0.36770437478593	0.958	0.984	0.000568087651381868	4	RPL10P16
PON31	2.26474372961006e-08	1.00144864071695	0.542	0.275	0.000657749521390649	4	PON3
NPC21	3.69409254409734e-08	0.706057561686285	0.972	0.971	0.00107287529758219	4	NPC2
MTCO2P2	4.55947577557549e-08	0.440403944143191	0.708	0.499	0.00132420854950039	4	MTCO2P2
RPL7P47	4.72708423618715e-08	0.269808376083155	0.917	0.875	0.00137288707471583	4	RPL7P47
UCHL11	6.10902675114202e-08	0.675877605711327	1	0.771	0.00177424463933418	4	UCHL1
MYO1B	8.00352216455237e-08	0.493633027207877	0.875	0.679	0.00232446294225094	4	MYO1B
TPT11	8.89858420123867e-08	0.549349964833544	1	0.998	0.00258441580956575	4	TPT1
CDH101	1.67068784077342e-07	0.331683894961595	0.708	0.371	0.00485217869595824	4	CDH10
SNX101	1.89917605903927e-07	0.262576669310346	0.694	0.362	0.00551577702826776	4	SNX10
PMAIP1	2.31482143157432e-07	0.682503606020068	0.264	0.087	0.00672293588372129	4	PMAIP1
FNDC3B	2.60778246612636e-07	0.263158666970801	0.806	0.575	0.00757378261637079	4	FNDC3B
CD44	2.77745655650325e-07	0.457510034200739	0.847	0.555	0.00806656707705238	4	CD44
EZR2	2.80424045663135e-07	0.624203403923973	1	0.946	0.00814435555819444	4	EZR
C5orf45	3.2714917557501e-07	0.363449510878241	0.819	0.598	0.00950139350622503	4	C5orf45
S100B	3.37518597643305e-07	0.292398702284444	0.375	0.145	0.00980255263135452	4	S100B
SNAP251	3.39294098454467e-07	0.756425875877391	0.972	0.886	0.00985411850141309	4	SNAP25
TMED61	3.69650872816136e-07	0.616766614811236	0.569	0.293	0.0107357702991991	4	TMED6
MIR1244-2	3.88411886554912e-07	0.287205418323156	0.764	0.551	0.0112806464212143	4	MIR1244-2
NCOA1	4.2879517165436e-07	0.344580144359659	0.847	0.595	0.0124534981703576	4	NCOA1
TTC31	4.54580512066074e-07	0.371349690184831	1	0.995	0.013202381811935	4	TTC3
H2AFY	4.67588396306955e-07	0.288695299998353	0.833	0.666	0.0135801697939429	4	H2AFY
EGR4	4.80572200186093e-07	0.271729710785685	0.569	0.354	0.0139572584100047	4	EGR4
HNRNPM	5.67382942711198e-07	0.274016858451058	0.847	0.712	0.0164785028051613	4	HNRNPM
ACTG11	6.02106455925841e-07	0.694189925192122	1	0.991	0.0174869777994542	4	ACTG1
ND41	6.47079110125062e-07	0.33699956850919	1	1	0.0187931185953622	4	ND4
SQSTM11	6.67951436833507e-07	0.864211604272157	0.972	0.902	0.0193993135799555	4	SQSTM1
AKAP9	7.40396446096693e-07	0.387387819389373	1	0.99	0.0215033339839862	4	AKAP9
TXNIP	7.72444637385291e-07	0.483426402231078	0.792	0.479	0.022434109603581	4	TXNIP
HNRNPA2B1	8.38051187889313e-07	0.52837157035755	1	0.991	0.0243395206498693	4	HNRNPA2B1
SEPW11	9.48543848001539e-07	0.754584791028034	0.944	0.848	0.0275485589775087	4	SEPW1
HSPB12	1.08245103628814e-06	0.398606183334611	0.764	0.614	0.0314376254469166	4	HSPB1
TRNA1	1.09017821620079e-06	0.70852670629764	0.931	0.914	0.0316620459331197	4	TRNA
GAS21	1.09201771712836e-06	0.440727682077871	0.806	0.536	0.031715470558559	4	GAS2
PHYHIPL	1.23410695739531e-06	0.251035626266982	0.556	0.31	0.035842168363632	4	PHYHIPL
JUNB	1.39437471729506e-06	0.28413574313987	0.917	0.723	0.0404968249144004	4	JUNB
MT2A1	1.42362008205703e-06	1.06983252530695	0.75	0.484	0.0413461980431823	4	MT2A
SOX41	1.5023293380906e-06	0.431452853207475	0.833	0.589	0.0436321509661653	4	SOX4
EEF1A1P51	1.58613532644606e-06	0.625745195433	1	1	0.0460661282859731	4	EEF1A1P5
LIPH	2.13728078410198e-06	0.313777154376744	0.306	0.121	0.0620730458126739	4	LIPH
SEC24D	2.32757279277421e-06	0.343977292849555	0.861	0.651	0.0675996966205415	4	SEC24D
NPNT1	2.79844559648406e-06	0.457714357104036	0.778	0.481	0.0812752554586867	4	NPNT
MAT2A	3.59841871778378e-06	0.678679514102543	0.819	0.664	0.104508874820594	4	MAT2A
GNAS1	4.23216570025979e-06	0.430248533787928	1	1	0.122914788432645	4	GNAS
PLSCR11	4.68424156848819e-06	0.486198835427745	0.681	0.456	0.136044427873603	4	PLSCR1
GABARAP1	5.2667379394414e-06	0.487571086379773	0.986	0.999	0.152961869975197	4	GABARAP
RTN1	6.69918328318623e-06	0.656829001545248	0.792	0.618	0.194564380093578	4	RTN1
RND3	6.78456494439922e-06	0.330822573575403	0.333	0.14	0.197044119680187	4	RND3
DALRD3	7.52721593676182e-06	0.273921129662273	0.819	0.661	0.218612932451373	4	DALRD3
FABP5P12	8.18753900853488e-06	0.412904962825793	0.75	0.531	0.237790695424879	4	FABP5P1
DSC2	8.38187955092362e-06	0.290895531555557	0.556	0.304	0.243434927797475	4	DSC2
EMC10	9.80892091207605e-06	0.274735005594327	0.958	0.927	0.284880490049425	4	EMC10
FABP52	1.09338772008182e-05	1.24515114008846	0.847	0.597	0.317552595543363	4	FABP5
CSRP1	1.10876643975935e-05	0.34104189448003	0.778	0.544	0.322019037099307	4	CSRP1
RPS3AP26	1.13880905034024e-05	0.251489233472621	1	0.996	0.330744312490315	4	RPS3AP26
RASD1	1.35444534986972e-05	0.581200222260567	0.778	0.711	0.393371562962662	4	RASD1
GREM1	1.35606346577645e-05	0.261675719112911	0.264	0.101	0.393841512365455	4	GREM1
DDX17	1.37706183054898e-05	0.34412360926742	0.986	0.984	0.39994006744634	4	DDX17
ELMO11	1.62699464030131e-05	0.272796245326805	0.778	0.546	0.472528053382708	4	ELMO1
TNFAIP81	1.70974506797422e-05	0.342585761823957	0.306	0.128	0.496561260091752	4	TNFAIP8
ND11	1.759068308425e-05	0.279023612540565	1	1	0.510886208815872	4	ND1
CD9	1.88614287957079e-05	0.510220796539821	0.361	0.166	0.547792476513745	4	CD9
C19orf43	1.95224068229222e-05	0.506976884810563	0.708	0.544	0.56698926135813	4	C19orf43
RPL91	1.98601953242874e-05	0.50616973573466	1	0.996	0.576799652803278	4	RPL9
MIS18BP1	2.01007093594336e-05	0.272162642211647	0.5	0.297	0.583784901926029	4	MIS18BP1
HSP90AA11	2.12178905387639e-05	0.321541474982033	1	1	0.616231194917321	4	HSP90AA1
JUND1	2.39899951244279e-05	0.345779843393532	1	0.997	0.69674142839876	4	JUND
TMOD11	2.50309524434859e-05	0.735860613064755	0.903	0.816	0.726973951816161	4	TMOD1
TRIB1	2.51542015369538e-05	0.311104718710524	0.514	0.295	0.730553475237748	4	TRIB1
PLS1	2.54587332249013e-05	0.279626215256781	0.861	0.631	0.739397989050808	4	PLS1
TUSC3	2.61510818778358e-05	0.550165416512595	0.958	0.948	0.759505870977984	4	TUSC3
SRP141	2.71726267802738e-05	0.45092829900253	1	0.996	0.789174599579492	4	SRP14
TPI1P1	3.03969825363336e-05	0.26555977430282	0.861	0.799	0.882819563802737	4	TPI1P1
ABCC81	3.25069281556728e-05	0.453310444506081	0.986	0.919	0.944098714425204	4	ABCC8
TSPAN3	3.2801387969436e-05	0.550236652561861	0.958	0.895	0.952650710796329	4	TSPAN3
LOC728392	3.54152535036564e-05	0.254149166671421	0.681	0.501	1	4	LOC728392
CDKN1A1	3.7046145397149e-05	0.324016330786597	0.611	0.374	1	4	CDKN1A
GTF2I	3.83023493884892e-05	0.41294631528935	1	0.946	1	4	GTF2I
MIR1244-1	4.09989279600084e-05	0.287721276307723	0.694	0.568	1	4	MIR1244-1
APMAP1	4.11247410377182e-05	0.822221477541231	0.792	0.613	1	4	APMAP
FAM188A	4.37561926408197e-05	0.281752789810069	0.528	0.324	1	4	FAM188A
APOL21	4.47426856935123e-05	0.539183720053208	0.847	0.721	1	4	APOL2
MAP21	4.76274884565534e-05	0.290289299969331	0.931	0.753	1	4	MAP2
FABP5P2	5.00655492432482e-05	0.269071430701221	0.708	0.513	1	4	FABP5P2
DDC	5.41785608681962e-05	0.432939041768672	0.375	0.194	1	4	DDC
SRSF11	5.49778113821273e-05	0.480323231347328	1	0.969	1	4	SRSF11
MAGEF1	6.63938969196147e-05	0.25196033251867	0.556	0.334	1	4	MAGEF1
SH3BGRL21	6.90619600238178e-05	0.64577840078459	0.833	0.61	1	4	SH3BGRL2
RHOB1	8.02430583660609e-05	0.302876367060158	0.889	0.714	1	4	RHOB
ATP6V0E2	9.11811392042446e-05	0.250730889177062	0.75	0.509	1	4	ATP6V0E2
H3F3B1	9.60762153943845e-05	0.435710559558451	1	0.998	1	4	H3F3B
FOXA3	0.000103143259332872	0.260577368735366	0.278	0.123	1	4	FOXA3
SREK1	0.000104369320533866	0.26079696604156	0.944	0.882	1	4	SREK1
MPHOSPH6	0.000118512082556091	0.417144637014195	0.694	0.473	1	4	MPHOSPH6
YWHAH1	0.000120212897117182	0.554917009862357	0.972	0.932	1	4	YWHAH
BTG31	0.000131660125168862	0.491685018980033	0.861	0.659	1	4	BTG3
C15orf481	0.000132068003265714	0.634989326261155	0.875	0.764	1	4	C15orf48
DSTN1	0.000133846254346015	0.5035837710573	1	0.993	1	4	DSTN
ND31	0.000137597058650982	0.373597771750696	1	0.999	1	4	ND3
BZW21	0.000138163948652534	0.569022662605515	0.444	0.254	1	4	BZW2
FABP5P72	0.000142332642474091	0.558709450634875	0.819	0.598	1	4	FABP5P7
TIPARP	0.000144212294937349	0.362389017820728	0.667	0.491	1	4	TIPARP
RPL7P231	0.000152031055932624	0.262400465180273	0.944	0.983	1	4	RPL7P23
KAT8	0.000166336922925275	0.320330438814597	0.375	0.21	1	4	KAT8
NEAT1	0.00016908098936078	0.779445436270991	0.875	0.765	1	4	NEAT1
GLRX1	0.000172872644303726	0.569072001027049	0.528	0.342	1	4	GLRX
RPL7P91	0.000184469013048003	0.360535090592663	0.972	0.991	1	4	RPL7P9
PLSCR4	0.00019432693879879	0.374193435303872	0.472	0.291	1	4	PLSCR4
SLC40A12	0.000203521624024849	0.325258720449479	0.806	0.596	1	4	SLC40A1
HSD17B111	0.000206963542543739	0.385730869052064	0.583	0.384	1	4	HSD17B11
ZNF823	0.000214393206064407	0.460782813886882	0.306	0.146	1	4	ZNF823
TDP2	0.000214812907825767	0.411585046807576	0.722	0.506	1	4	TDP2
OSBPL8	0.000228709468191123	0.312758538379874	0.792	0.581	1	4	OSBPL8
NPTN	0.000246541112084238	0.346818740650371	0.944	0.884	1	4	NPTN
RPL7P1	0.000281933236902521	0.250062742662299	0.958	0.991	1	4	RPL7P
ND4L1	0.000295268105184383	0.283878436876552	1	1	1	4	ND4L
REV3L	0.000310717195908678	0.255786685426914	0.931	0.759	1	4	REV3L
RAB25	0.000333225791161918	0.548313235730208	0.569	0.397	1	4	RAB25
SRSF5	0.000345811639497973	0.299979650190437	0.958	0.946	1	4	SRSF5
PON21	0.000349465666046331	0.440721229082283	0.75	0.569	1	4	PON2
ERRFI11	0.000358505143462461	0.282969329853857	0.611	0.442	1	4	ERRFI1
AFTPH	0.000378633206974865	0.263390776189759	0.792	0.612	1	4	AFTPH
TMEM45B1	0.000389615770981312	0.340886987098219	0.542	0.352	1	4	TMEM45B
IGFBP71	0.000390876273327346	0.347123936119006	0.861	0.683	1	4	IGFBP7
DAP	0.000393350163253409	0.290763776172169	0.889	0.716	1	4	DAP
TTLL7	0.000410862851750583	0.307099851717256	0.528	0.356	1	4	TTLL7
RAD21	0.00041122282006246	0.454543894231609	0.972	0.902	1	4	RAD21
HMGN3	0.000433680672533423	0.484302670362117	0.958	0.951	1	4	HMGN3
TMX4	0.000436891844905691	0.341596051816156	0.875	0.692	1	4	TMX4
S100A111	0.0004395784879295	0.369717282700934	0.944	0.802	1	4	S100A11
NR0B1	0.000504451772187016	0.407814552347325	0.458	0.28	1	4	NR0B1
MOAP1	0.000511072631135435	0.282803412317695	0.5	0.327	1	4	MOAP1
BRD8	0.000528040516879302	0.351808674714762	0.917	0.866	1	4	BRD8
CALM21	0.00052901725700727	0.380336324958108	1	0.998	1	4	CALM2
CFI	0.000556457342234192	0.333483212261653	0.417	0.236	1	4	CFI
NDFIP1	0.000566673179087148	0.263334721184756	0.958	0.893	1	4	NDFIP1
KHDRBS1	0.000571297860790725	0.283444876779565	0.847	0.714	1	4	KHDRBS1
MAGED2	0.000586050988764351	0.462328198622868	0.944	0.879	1	4	MAGED2
HNRNPA11	0.000642862769307934	0.369301275080955	1	0.957	1	4	HNRNPA1
EIF4G21	0.000653914696799638	0.390591593603423	1	0.978	1	4	EIF4G2
ZFAND5	0.00077223045524781	0.259128191650312	0.958	0.839	1	4	ZFAND5
RWDD3	0.000862564607573148	0.38913523272961	0.403	0.241	1	4	RWDD3
GBAS	0.000871175893252963	0.306677177331305	0.639	0.471	1	4	GBAS
NEUROD11	0.000887941513719405	0.786336210255977	0.972	0.966	1	4	NEUROD1
GSTO11	0.000929899549798043	0.402758576927863	0.847	0.745	1	4	GSTO1
UBB	0.00101537853814681	0.300652666689182	1	0.999	1	4	UBB
GRIA3	0.00102557316960135	0.256444250376523	0.847	0.696	1	4	GRIA3
COMMD61	0.00105561171347166	0.335113943314025	0.944	0.906	1	4	COMMD6
MAF	0.00106172730572179	0.27948634159113	0.667	0.487	1	4	MAF
COPRS	0.00113604149979055	0.373135396157584	0.486	0.342	1	4	COPRS
MIR1244-3	0.00114846942508318	0.265759068687219	0.708	0.571	1	4	MIR1244-3
PDHB	0.00117789041465952	0.315076177603083	0.944	0.794	1	4	PDHB
EPB41L3	0.00119459682173296	0.323483167928428	0.792	0.658	1	4	EPB41L3
PLA2G4C	0.00122208308147622	0.364074477907967	0.486	0.319	1	4	PLA2G4C
CAMK2N1	0.00124942542954456	0.374937029080584	0.944	0.903	1	4	CAMK2N1
TEX261	0.00125243111518504	0.294896259884599	0.514	0.341	1	4	TEX261
S100A61	0.00129687165536628	0.47339898132095	0.931	0.84	1	4	S100A6
GBA	0.00133524796858996	0.501331868434497	0.736	0.58	1	4	GBA
HTATSF1	0.00146822097375707	0.297282454831124	0.833	0.678	1	4	HTATSF1
TMEM1231	0.0014916514847726	0.267456674928644	0.75	0.589	1	4	TMEM123
SLC9A3R1	0.0015108625221402	0.310756424984434	0.653	0.492	1	4	SLC9A3R1
CADPS1	0.00154571953219242	0.593238330708145	0.944	0.918	1	4	CADPS
BHLHE401	0.00162844574071832	0.514036289819103	0.694	0.537	1	4	BHLHE40
WDR73	0.00162916427993088	0.398298632263632	0.347	0.214	1	4	WDR73
FAM159B1	0.00166503758411159	0.534095196993715	0.639	0.488	1	4	FAM159B
QARS	0.00167490796551719	0.276630097289734	0.597	0.414	1	4	QARS
CPE	0.00178815074279983	0.30482238555267	1	1	1	4	CPE
KTN11	0.0018985771202242	0.288495545847502	0.972	0.929	1	4	KTN1
UBXN6	0.00202555736304589	0.251162700588809	0.528	0.371	1	4	UBXN6
BLCAP	0.00211880919176972	0.525757757803143	0.583	0.424	1	4	BLCAP
TMED9	0.00229599368055531	0.273436301386464	0.778	0.654	1	4	TMED9
GNB2L11	0.00232560990431044	0.323873267292963	1	0.995	1	4	GNB2L1
AHI1	0.00243604400125933	0.321388205733882	0.958	0.961	1	4	AHI1
HNRNPD	0.00249085332018407	0.31751178252246	0.847	0.808	1	4	HNRNPD
AES1	0.00252498393048398	0.280209868915507	0.986	0.966	1	4	AES
DUSP11	0.00266796847530648	0.780552186256885	0.833	0.819	1	4	DUSP1
DLG1	0.00278022928011572	0.278990916546856	0.708	0.589	1	4	DLG1
CD81	0.00284761197003796	0.387735718071685	0.889	0.836	1	4	CD81
CTSA1	0.00312948195013571	0.479902775567826	0.847	0.816	1	4	CTSA
ARF3	0.00313808616109698	0.337018307015114	0.75	0.63	1	4	ARF3
RCBTB21	0.00323059388832109	0.263141689341319	0.389	0.231	1	4	RCBTB2
RBP11	0.00335404120132617	0.39689156806088	0.694	0.664	1	4	RBP1
SLC44A4	0.00352200171510361	0.259587322057332	0.292	0.169	1	4	SLC44A4
MICU2	0.00360010368017535	0.276621485613863	0.667	0.499	1	4	MICU2
SEPT2	0.00388676367581805	0.472852130358558	0.931	0.911	1	4	SEPT2
FAM120A	0.00388897372557695	0.372072375193479	0.819	0.71	1	4	FAM120A
RBBP7	0.0046259120268874	0.438457154902125	0.694	0.556	1	4	RBBP7
NPIPA1	0.00464843622466104	0.352084719353397	0.819	0.777	1	4	NPIPA1
TM4SF43	0.00514682720586235	0.266041056897594	1	0.831	1	4	TM4SF4
REXO2	0.00526570675728192	0.818205061797137	0.806	0.668	1	4	REXO2
PTMA1	0.00526840338288331	0.316049713140678	0.986	1	1	4	PTMA
NFKBIA1	0.00550745500825545	0.347859518008328	0.694	0.511	1	4	NFKBIA
TOX3	0.00580018216027604	0.270301168985039	0.542	0.396	1	4	TOX3
FKBP1A	0.00596840044103918	0.3633292194744	0.931	0.884	1	4	FKBP1A
ZNF511	0.006566591425541	0.253899879544965	0.264	0.153	1	4	ZNF511
ATP13A3	0.0069690215509142	0.309151302130524	0.792	0.699	1	4	ATP13A3
ATXN7L3B1	0.00708672745308592	0.487218230492864	0.792	0.731	1	4	ATXN7L3B
KCNMB2	0.00716575722463122	0.416096546413989	0.903	0.779	1	4	KCNMB2
SCP2	0.00738168723404776	0.348815348755973	0.986	0.939	1	4	SCP2
TBCC1	0.0074403867261437	0.370439443751133	0.583	0.418	1	4	TBCC
SLC35D2	0.00784917803114473	0.361306079894515	0.292	0.18	1	4	SLC35D2
GNG10	0.00797102986356816	0.340558725243153	0.792	0.706	1	4	GNG10
FTL2	0.00800204786457542	0.589324499238678	1	1	1	4	FTL
LDOC1	0.00838513362120579	0.487534600858998	0.542	0.424	1	4	LDOC1
ANXA51	0.0087848227533698	0.273179516189936	0.958	0.949	1	4	ANXA5
NEMF	0.00923979253051236	0.252816049059762	0.917	0.852	1	4	NEMF
NFE2L21	0.00985294607562597	0.270893561330779	0.792	0.689	1	4	NFE2L2
SNAR-E	3.65924303497825e-124	1.20692475720308	0.906	0.044	1.06275395464873e-119	5	SNAR-E
SNAR-C4	1.73192939280786e-92	0.313565985476839	0.679	0.032	5.03004253553188e-88	5	SNAR-C4
SNAR-C3	9.9309509399901e-92	1.10596703945433	0.736	0.04	2.88424608150133e-87	5	SNAR-C3
SNAR-B2	2.93685040201713e-90	3.43704171753071	0.943	0.088	8.52949462257834e-86	5	SNAR-B2
SNAR-B1	8.49808593547509e-85	3.46813764182616	0.943	0.098	2.46809909824003e-80	5	SNAR-B1
C19orf773	2.42094138303887e-05	0.485474134638788	0.906	0.619	0.703114005875979	5	C19orf77
GC3	2.69530221532348e-05	0.671073693274984	0.925	0.703	0.7827966223964	5	GC
FAP3	3.50554350268155e-05	0.599130520280713	0.868	0.636	1	5	FAP
TM4SF44	3.61844245279845e-05	0.577817014988344	1	0.833	1	5	TM4SF4
CRH1	5.08367493378868e-05	0.423298494275	0.585	0.359	1	5	CRH
BCYRN1P1	5.63170659218866e-05	2.45312743244106	0.717	0.517	1	5	BCYRN1P1
RNASE41	8.64404226497537e-05	0.424411816206332	0.698	0.464	1	5	RNASE4
FXYD53	9.85977282430392e-05	0.589225157225574	0.849	0.651	1	5	FXYD5
COX8A2	0.000104838358478941	0.504685329008389	1	0.969	1	5	COX8A
BCYRN1	0.000105188004484586	1.25151914999894	0.717	0.514	1	5	BCYRN1
CRYBA23	0.000238765513221808	0.475851517751873	0.887	0.696	1	5	CRYBA2
ARX2	0.000240032044681307	0.263881078720126	0.868	0.581	1	5	ARX
TMEM176A2	0.000342335770368691	0.329844894946844	0.943	0.745	1	5	TMEM176A
TTR3	0.000392124308422367	0.515921001787202	1	0.999	1	5	TTR
ALDH1A13	0.000436953892266689	0.413036418858157	1	0.99	1	5	ALDH1A1
TMEM176B3	0.000519104115506736	0.383333437757407	0.981	0.856	1	5	TMEM176B
VSNL1	0.000742260913405349	0.251767120074302	0.302	0.138	1	5	VSNL1
PLIN31	0.000859017136393724	0.347693982303253	0.774	0.562	1	5	PLIN3
CLU3	0.00111937977505589	0.330701798473131	1	0.987	1	5	CLU
NDUFB2	0.00121097851911735	0.311916060451838	1	0.991	1	5	NDUFB2
GSTA11	0.00122230204475226	0.735789363976156	0.396	0.221	1	5	GSTA1
KCTD122	0.00170577721292699	0.337174493247648	0.811	0.696	1	5	KCTD12
IGFBPL12	0.00196125758067041	0.340248113148557	0.736	0.5	1	5	IGFBPL1
GCG3	0.00202732406556024	0.557306386602807	1	0.994	1	5	GCG
NPNT2	0.00357381531274467	0.265445011882427	0.66	0.49	1	5	NPNT
CHGA1	0.00371302804844325	0.362596754993621	1	0.984	1	5	CHGA
CSGALNACT1	0.00474623732081992	0.293970424410874	0.585	0.394	1	5	CSGALNACT1
SCGB2A12	0.00540552148682827	0.499192409910652	0.906	0.867	1	5	SCGB2A1
ATP5J2	0.00621722360134968	0.378657947835074	1	0.958	1	5	ATP5J2
HLA-A3	0.00683565069213725	0.271148806442667	0.981	0.989	1	5	HLA-A
PCSK22	0.00716383449091382	0.368328932400916	0.981	0.975	1	5	PCSK2
ARRDC42	0.00802267995644079	0.401705746577724	0.679	0.509	1	5	ARRDC4
SLC38A43	0.00817766109124436	0.307641905301786	0.887	0.772	1	5	SLC38A4
IGFBP72	0.00880047249762498	0.353373799366975	0.849	0.686	1	5	IGFBP7
PDK43	0.00942642914164048	0.504904689450908	0.811	0.728	1	5	PDK4
BCHE	7.66270717874974e-102	1.497807873473	0.708	0.029	2.22548004592429e-97	6	BCHE
[truncated: 170 more rows]
