# Supplementary material for: scGENA: A Single-Cell Gene Coexpression Network Analysis Framework for Clustering Cell Types and Revealing Biological Mechanisms
Source: Bioengineering (Basel). 2022 Jul 30;9(8):353. doi: 10.3390/bioengineering9080353 (PMC9405199; doi:10.3390/bioengineering9080353)
Supplement: Supplementary file 1 [file bioengineering-09-00353-s001.zip › Table S2-S4 Alpha Cells GO.xlsx]

## Sheet: Table S2 go_MBlue_Alpha_cells
ONTOLOGY	ID	Description	GeneRatio	BgRatio	pvalue	p.adjust	qvalue	geneID	Count
BP	GO:0019885	antigen processing and presentation of endogenous peptide antigen via MHC class I	5/151	17/18862	1.76184e-07	0.000394473	0.000334905	567/3133/3106/3105/6892	5
BP	GO:0002483	antigen processing and presentation of endogenous peptide antigen	5/151	19/18862	3.26821e-07	0.000394473	0.000334905	567/3133/3106/3105/6892	5
BP	GO:0019883	antigen processing and presentation of endogenous antigen	5/151	26/18862	1.76713e-06	0.00139229	0.00118205	567/3133/3106/3105/6892	5
BP	GO:0002479	antigen processing and presentation of exogenous peptide antigen via MHC class I, TAP-dependent	7/151	75/18862	2.30703e-06	0.00139229	0.00118205	567/3133/3106/811/3105/5691/6892	7
BP	GO:0042590	antigen processing and presentation of exogenous peptide antigen via MHC class I	7/151	80/18862	3.57121e-06	0.00172418	0.00146382	567/3133/3106/811/3105/5691/6892	7
BP	GO:0030073	insulin secretion	10/151	207/18862	6.6647e-06	0.00268143	0.00227652	2641/1803/169026/1392/7425/292/25874/54097/8431/1113	10
BP	GO:0009914	hormone transport	12/151	312/18862	8.19312e-06	0.00282546	0.0023988	2641/7276/1803/23428/169026/1392/7425/292/25874/54097/8431/1113	12
BP	GO:0002474	antigen processing and presentation of peptide antigen via MHC class I	7/151	99/18862	1.47441e-05	0.00444903	0.0037772	567/3133/3106/811/3105/5691/6892	7
BP	GO:0051604	protein maturation	11/151	293/18862	2.46792e-05	0.00661951	0.00561993	51126/10159/5126/4325/5646/2152/10549/811/28972/1363/9528	11
BP	GO:0030072	peptide hormone secretion	10/151	247/18862	3.0809e-05	0.00743728	0.00631421	2641/1803/169026/1392/7425/292/25874/54097/8431/1113	10
BP	GO:0009306	protein secretion	12/151	367/18862	4.07845e-05	0.00842331	0.00715135	2641/1803/169026/1392/7425/292/1595/25874/54097/8431/1113/7857	12
BP	GO:0035592	establishment of protein localization to extracellular region	12/151	368/18862	4.18723e-05	0.00842331	0.00715135	2641/1803/169026/1392/7425/292/1595/25874/54097/8431/1113/7857	12
BP	GO:0071692	protein localization to extracellular region	12/151	375/18862	5.02169e-05	0.0093249	0.00791679	2641/1803/169026/1392/7425/292/1595/25874/54097/8431/1113/7857	12
BP	GO:0001916	positive regulation of T cell mediated cytotoxicity	4/151	29/18862	8.02133e-05	0.0135036	0.0114645	567/3133/3106/3105	4
BP	GO:0002478	antigen processing and presentation of exogenous peptide antigen	8/151	177/18862	9.11501e-05	0.0135036	0.0114645	567/3133/829/3106/811/3105/5691/6892	8
BP	GO:0050796	regulation of insulin secretion	8/151	178/18862	9.48011e-05	0.0135036	0.0114645	2641/1803/169026/1392/292/25874/8431/1113	8
BP	GO:0002790	peptide secretion	12/151	401/18862	9.50955e-05	0.0135036	0.0114645	2641/1803/169026/1392/7425/292/1595/25874/54097/8431/1113/7857	12
BP	GO:0019884	antigen processing and presentation of exogenous antigen	8/151	185/18862	0.000123905	0.0166171	0.0141078	567/3133/829/3106/811/3105/5691/6892	8
BP	GO:2001198	regulation of dendritic cell differentiation	3/151	13/18862	0.000135622	0.0172311	0.0146291	28959/3106/55365	3
BP	GO:0046879	hormone secretion	10/151	302/18862	0.000163814	0.0197501	0.0167677	2641/1803/169026/1392/7425/292/25874/54097/8431/1113	10
BP	GO:0048002	antigen processing and presentation of peptide antigen	8/151	194/18862	0.000171811	0.0197501	0.0167677	567/3133/829/3106/811/3105/5691/6892	8
BP	GO:0034341	response to interferon-gamma	8/151	197/18862	0.000190815	0.0209376	0.0177759	169026/4360/567/7431/3133/3106/3105/960	8
BP	GO:0001914	regulation of T cell mediated cytotoxicity	4/151	38/18862	0.000235731	0.0247415	0.0210054	567/3133/3106/3105	4
BP	GO:0032024	positive regulation of insulin secretion	5/151	71/18862	0.000261867	0.0263394	0.022362	2641/169026/1392/25874/8431	5
BP	GO:0090276	regulation of peptide hormone secretion	8/151	209/18862	0.00028495	0.0275148	0.0233599	2641/1803/169026/1392/292/25874/8431/1113	8
BP	GO:0055119	relaxation of cardiac muscle	3/151	17/18862	0.000314964	0.0292431	0.0248273	1113/3759/481	3
BP	GO:0089718	amino acid import across plasma membrane	4/151	42/18862	0.000348689	0.0311754	0.0264677	23428/5999/6520/3688	4
BP	GO:0045953	negative regulation of natural killer cell mediated cytotoxicity	3/151	18/18862	0.000375743	0.0323944	0.0275027	3133/3106/3105	3
BP	GO:1904062	regulation of cation transmembrane transport	10/151	340/18862	0.000421269	0.0331271	0.0281247	53827/1392/5349/783/5999/3759/481/5174/3688/11261	10
BP	GO:0050708	regulation of protein secretion	9/151	279/18862	0.000422074	0.0331271	0.0281247	2641/1803/169026/1392/292/1595/25874/8431/1113	9
BP	GO:0001667	ameboidal-type cell migration	12/151	473/18862	0.000432973	0.0331271	0.0281247	2191/1803/54453/5646/9124/8879/811/11171/5217/5168/3688/7857	12
BP	GO:0002716	negative regulation of natural killer cell mediated immunity	3/151	19/18862	0.000443582	0.0331271	0.0281247	3133/3106/3105	3
BP	GO:0016485	protein processing	8/151	224/18862	0.000452856	0.0331271	0.0281247	10159/5126/4325/5646/2152/28972/1363/9528	8
BP	GO:0043312	neutrophil degranulation	12/151	485/18862	0.000540771	0.0371016	0.031499	7276/567/84418/5912/302/23406/10159/5646/10549/3106/8895/960	12
BP	GO:0071346	cellular response to interferon-gamma	7/151	177/18862	0.000564905	0.0371016	0.031499	4360/567/7431/3133/3106/3105/960	7
BP	GO:0002283	neutrophil activation involved in immune response	12/151	488/18862	0.000571	0.0371016	0.031499	7276/567/84418/5912/302/23406/10159/5646/10549/3106/8895/960	12
BP	GO:0001913	T cell mediated cytotoxicity	4/151	48/18862	0.000584035	0.0371016	0.031499	567/3133/3106/3105	4
BP	GO:0043090	amino acid import	4/151	48/18862	0.000584035	0.0371016	0.031499	23428/5999/6520/3688	4
BP	GO:0019882	antigen processing and presentation	8/151	234/18862	0.000603982	0.0373849	0.0317396	567/3133/829/3106/811/3105/5691/6892	8
BP	GO:0001911	negative regulation of leukocyte mediated cytotoxicity	3/151	22/18862	0.000692671	0.0406096	0.0344774	3133/3106/3105	3
BP	GO:0002446	neutrophil mediated immunity	12/151	499/18862	0.000694307	0.0406096	0.0344774	7276/567/84418/5912/302/23406/10159/5646/10549/3106/8895/960	12
BP	GO:0042119	neutrophil activation	12/151	500/18862	0.000706547	0.0406096	0.0344774	7276/567/84418/5912/302/23406/10159/5646/10549/3106/8895/960	12
BP	GO:0097581	lamellipodium organization	5/151	89/18862	0.000743994	0.0417675	0.0354604	51196/3983/5168/3688/960	5
BP	GO:0002711	positive regulation of T cell mediated immunity	4/151	52/18862	0.000792709	0.0434909	0.0369236	567/3133/3106/3105	4
BP	GO:0060333	interferon-gamma-mediated signaling pathway	5/151	91/18862	0.000822974	0.044148	0.0374814	567/3133/3106/3105/960	5
BP	GO:0002791	regulation of peptide secretion	9/151	308/18862	0.000855972	0.0449199	0.0381368	2641/1803/169026/1392/292/1595/25874/8431/1113	9
BP	GO:2000649	regulation of sodium ion transmembrane transporter activity	4/151	54/18862	0.000914627	0.0469768	0.0398831	53827/5349/481/11261	4
BP	GO:0001912	positive regulation of leukocyte mediated cytotoxicity	4/151	55/18862	0.000980282	0.0482556	0.0409687	567/3133/3106/3105	4
BP	GO:0060337	type I interferon signaling pathway	5/151	95/18862	0.000999494	0.0482556	0.0409687	3133/11274/2537/3106/3105	5
BP	GO:0090277	positive regulation of peptide hormone secretion	5/151	95/18862	0.000999494	0.0482556	0.0409687	2641/169026/1392/25874/8431	5
BP	GO:0003333	amino acid transmembrane transport	5/151	96/18862	0.0010477	0.0486375	0.041293	55089/23428/5999/6520/3688	5
BP	GO:0071357	cellular response to type I interferon	5/151	96/18862	0.0010477	0.0486375	0.041293	3133/11274/2537/3106/3105	5
BP	GO:0032412	regulation of ion transmembrane transporter activity	8/151	257/18862	0.00110858	0.0501389	0.0425677	53827/1392/5349/783/481/5174/3688/11261	8
BP	GO:0031342	negative regulation of cell killing	3/151	26/18862	0.00114235	0.0501389	0.0425677	3133/3106/3105	3
BP	GO:0051953	negative regulation of amine transport	3/151	26/18862	0.00114235	0.0501389	0.0425677	1392/1113/5999	3
BP	GO:0046883	regulation of hormone secretion	8/151	260/18862	0.00119385	0.0514634	0.0436922	2641/1803/169026/1392/292/25874/8431/1113	8
BP	GO:0034340	response to type I interferon	5/151	101/18862	0.00131506	0.0556938	0.0472837	3133/11274/2537/3106/3105	5
BP	GO:0006865	amino acid transport	6/151	152/18862	0.00141625	0.0589455	0.0500444	55089/2744/23428/5999/6520/3688	6
BP	GO:0022898	regulation of transmembrane transporter activity	8/151	268/18862	0.00144704	0.0592059	0.0502655	53827/1392/5349/783/481/5174/3688/11261	8
BP	GO:0002456	T cell mediated immunity	5/151	104/18862	0.00149787	0.059914	0.0508667	567/3133/3106/4179/3105	5
BP	GO:1905039	carboxylic acid transmembrane transport	6/151	154/18862	0.00151398	0.059914	0.0508667	55089/23428/25874/5999/6520/3688	6
BP	GO:1903825	organic acid transmembrane transport	6/151	155/18862	0.00156473	0.0599619	0.0509073	55089/23428/25874/5999/6520/3688	6
BP	GO:0023061	signal release	11/151	475/18862	0.00156487	0.0599619	0.0509073	2641/1803/169026/1392/7425/292/25874/783/54097/8431/1113	11
BP	GO:0031343	positive regulation of cell killing	4/151	63/18862	0.00162954	0.0605187	0.0513801	567/3133/3106/3105	4
BP	GO:1902475	L-alpha-amino acid transmembrane transport	4/151	63/18862	0.00162954	0.0605187	0.0513801	23428/5999/6520/3688	4
BP	GO:1902305	regulation of sodium ion transmembrane transport	4/151	64/18862	0.00172749	0.0631131	0.0535827	53827/5349/481/11261	4
BP	GO:0006643	membrane lipid metabolic process	7/151	215/18862	0.00175169	0.0631131	0.0535827	10400/25870/54344/8879/51604/9524/5168	7
BP	GO:0098739	import across plasma membrane	6/151	161/18862	0.00189697	0.0667351	0.0566578	23428/5999/6520/3759/481/3688	6
BP	GO:0042744	hydrogen peroxide catabolic process	3/151	31/18862	0.00191802	0.0667351	0.0566578	2878/10549/25824	3
BP	GO:1905954	positive regulation of lipid localization	5/151	111/18862	0.00199649	0.0667351	0.0566578	1392/10226/302/1622/3688	5
BP	GO:0032409	regulation of transporter activity	8/151	283/18862	0.00203567	0.0667351	0.0566578	53827/1392/5349/783/481/5174/3688/11261	8
BP	GO:0033866	nucleoside bisphosphate biosynthetic process	4/151	67/18862	0.00204573	0.0667351	0.0566578	25874/6319/9060/9524	4
BP	GO:0034030	ribonucleoside bisphosphate biosynthetic process	4/151	67/18862	0.00204573	0.0667351	0.0566578	25874/6319/9060/9524	4
BP	GO:0034033	purine nucleoside bisphosphate biosynthetic process	4/151	67/18862	0.00204573	0.0667351	0.0566578	25874/6319/9060/9524	4
BP	GO:0090075	relaxation of muscle	3/151	32/18862	0.00210411	0.0677242	0.0574975	1113/3759/481	3
BP	GO:0010631	epithelial cell migration	9/151	357/18862	0.00236359	0.0750752	0.0637384	2191/1803/54453/5646/811/11171/5217/5168/7857	9
BP	GO:0090132	epithelium migration	9/151	360/18862	0.00249981	0.078008	0.0662284	2191/1803/54453/5646/811/11171/5217/5168/7857	9
BP	GO:0006695	cholesterol biosynthetic process	4/151	72/18862	0.00266253	0.078008	0.0662284	1595/3422/6319/6307	4
BP	GO:1902653	secondary alcohol biosynthetic process	4/151	72/18862	0.00266253	0.078008	0.0662284	1595/3422/6319/6307	4
BP	GO:0006813	potassium ion transport	7/151	232/18862	0.00268719	0.078008	0.0662284	83795/5349/5999/3759/481/3688/11261	7
BP	GO:0035774	positive regulation of insulin secretion involved in cellular response to glucose stimulus	3/151	35/18862	0.00272827	0.078008	0.0662284	2641/1392/25874	3
BP	GO:0090130	tissue migration	9/151	365/18862	0.00274066	0.078008	0.0662284	2191/1803/54453/5646/811/11171/5217/5168/7857	9
BP	GO:0015808	L-alanine transport	2/151	10/18862	0.00274676	0.078008	0.0662284	23428/6520	2
BP	GO:0070327	thyroid hormone transport	2/151	10/18862	0.00274676	0.078008	0.0662284	7276/23428	2
BP	GO:0097250	mitochondrial respirasome assembly	2/151	10/18862	0.00274676	0.078008	0.0662284	25994/1346	2
BP	GO:0006605	protein targeting	10/151	441/18862	0.00295761	0.0830194	0.070483	64374/1191/6745/401505/5174/6144/28972/6746/11261/7314	10
BP	GO:0042596	fear response	3/151	37/18862	0.00320135	0.0885772	0.0752016	1803/1392/153	3
BP	GO:0046887	positive regulation of hormone secretion	5/151	124/18862	0.00322899	0.0885772	0.0752016	2641/169026/1392/25874/8431	5
BP	GO:2000392	regulation of lamellipodium morphogenesis	2/151	11/18862	0.00333956	0.0905809	0.0769027	5168/960	2
BP	GO:0009595	detection of biotic stimulus	3/151	38/18862	0.00345554	0.0916668	0.0778246	2191/3106/3105	3
BP	GO:0045823	positive regulation of heart contraction	3/151	38/18862	0.00345554	0.0916668	0.0778246	153/1113/5999	3
BP	GO:0002709	regulation of T cell mediated immunity	4/151	78/18862	0.00355782	0.0923503	0.0784049	567/3133/3106/3105	4
BP	GO:0016126	sterol biosynthetic process	4/151	78/18862	0.00355782	0.0923503	0.0784049	1595/3422/6319/6307	4
BP	GO:0008016	regulation of heart contraction	7/151	245/18862	0.0036308	0.0932419	0.0791619	5349/783/153/1113/5999/3759/481	7
BP	GO:0001910	regulation of leukocyte mediated cytotoxicity	4/151	79/18862	0.0037246	0.0941452	0.0799288	567/3133/3106/3105	4
BP	GO:0051346	negative regulation of hydrolase activity	10/151	456/18862	0.00374752	0.0941452	0.0799288	5502/9749/50859/302/2537/5274/25824/81706/11261/960	10
BP	GO:0009749	response to glucose	6/151	185/18862	0.00378297	0.0941452	0.0799288	2641/169026/1392/3939/25874/8431	6
BP	GO:0050714	positive regulation of protein secretion	5/151	129/18862	0.00382394	0.0941938	0.0799701	2641/169026/1392/25874/8431	5
BP	GO:0010958	regulation of amino acid import across plasma membrane	2/151	12/18862	0.00398648	0.0956073	0.0811701	5999/3688	2
BP	GO:1903789	regulation of amino acid transmembrane transport	2/151	12/18862	0.00398648	0.0956073	0.0811701	5999/3688	2
BP	GO:1903524	positive regulation of blood circulation	3/151	40/18862	0.00400014	0.0956073	0.0811701	153/1113/5999	3
BP	GO:0022617	extracellular matrix disassembly	4/151	81/18862	0.00407392	0.0964162	0.0818568	2191/1803/4325/960	4
BP	GO:0009746	response to hexose	6/151	190/18862	0.00430724	0.100948	0.0857047	2641/169026/1392/3939/25874/8431	6
BP	GO:0032092	positive regulation of protein binding	4/151	83/18862	0.00444476	0.101014	0.0857603	2641/567/302/22919	4
BP	GO:1902622	regulation of neutrophil migration	3/151	42/18862	0.00459412	0.101014	0.0857603	1803/83692/4267	3
BP	GO:0015849	organic acid transport	8/151	324/18862	0.00463276	0.101014	0.0857603	55089/2744/23428/25874/8431/5999/6520/3688	8
BP	GO:0015801	aromatic amino acid transport	2/151	13/18862	0.00468664	0.101014	0.0857603	23428/6520	2
BP	GO:0015816	glycine transport	2/151	13/18862	0.00468664	0.101014	0.0857603	23428/5999	2
BP	GO:0030007	cellular potassium ion homeostasis	2/151	13/18862	0.00468664	0.101014	0.0857603	3759/481	2
BP	GO:0033604	negative regulation of catecholamine secretion	2/151	13/18862	0.00468664	0.101014	0.0857603	1392/1113	2
BP	GO:0072683	T cell extravasation	2/151	13/18862	0.00468664	0.101014	0.0857603	83692/4267	2
BP	GO:1903054	negative regulation of extracellular matrix organization	2/151	13/18862	0.00468664	0.101014	0.0857603	2191/1803	2
BP	GO:0032370	positive regulation of lipid transport	4/151	85/18862	0.0048377	0.101784	0.0864139	1392/302/1622/3688	4
BP	GO:0034284	response to monosaccharide	6/151	196/18862	0.00500511	0.101784	0.0864139	2641/169026/1392/3939/25874/8431	6
BP	GO:0051952	regulation of amine transport	4/151	86/18862	0.00504265	0.101784	0.0864139	1392/1113/5999/3688	4
BP	GO:1901379	regulation of potassium ion transmembrane transport	4/151	86/18862	0.00504265	0.101784	0.0864139	5999/3759/481/3688	4
BP	GO:0008202	steroid metabolic process	8/151	329/18862	0.00507231	0.101784	0.0864139	1392/2638/1595/3422/6319/8431/6307/8879	8
BP	GO:0098754	detoxification	5/151	138/18862	0.00508652	0.101784	0.0864139	2878/10549/5174/25824/2938	5
BP	GO:1903793	positive regulation of anion transport	10/151	478/18862	0.00519986	0.101784	0.0864139	2641/169026/1392/302/25874/8431/1622/5174/3688/11261	10
BP	GO:0010761	fibroblast migration	3/151	44/18862	0.00523874	0.101784	0.0864139	9124/8879/3688	3
BP	GO:0015804	neutral amino acid transport	3/151	44/18862	0.00523874	0.101784	0.0864139	23428/5999/6520	3
BP	GO:0042269	regulation of natural killer cell mediated cytotoxicity	3/151	44/18862	0.00523874	0.101784	0.0864139	3133/3106/3105	3
BP	GO:0002028	regulation of sodium ion transport	4/151	87/18862	0.00525334	0.101784	0.0864139	53827/5349/481/11261	4
BP	GO:0033865	nucleoside bisphosphate metabolic process	5/151	140/18862	0.00540285	0.101784	0.0864139	25874/6319/1622/9060/9524	5
BP	GO:0033875	ribonucleoside bisphosphate metabolic process	5/151	140/18862	0.00540285	0.101784	0.0864139	25874/6319/1622/9060/9524	5
BP	GO:0034032	purine nucleoside bisphosphate metabolic process	5/151	140/18862	0.00540285	0.101784	0.0864139	25874/6319/1622/9060/9524	5
BP	GO:0002475	antigen processing and presentation via MHC class Ib	2/151	14/18862	0.00543915	0.101784	0.0864139	567/3133	2
BP	GO:0060049	regulation of protein glycosylation	2/151	14/18862	0.00543915	0.101784	0.0864139	11261/9528	2
BP	GO:0072672	neutrophil extravasation	2/151	14/18862	0.00543915	0.101784	0.0864139	83692/4267	2
BP	GO:1904064	positive regulation of cation transmembrane transport	5/151	141/18862	0.00556612	0.102833	0.0873043	783/3759/481/5174/11261	5
BP	GO:0002707	negative regulation of lymphocyte mediated immunity	3/151	45/18862	0.00558039	0.102833	0.0873043	3133/3106/3105	3
BP	GO:0019730	antimicrobial humoral response	5/151	142/18862	0.00573285	0.104842	0.0890101	3133/5646/1113/1191/3105	5
BP	GO:0006720	isoprenoid metabolic process	5/151	143/18862	0.00590308	0.105664	0.089708	7276/6383/1392/3422/216	5
BP	GO:0003073	regulation of systemic arterial blood pressure	4/151	90/18862	0.00592058	0.105664	0.089708	1392/10159/153/23576	4
BP	GO:0008654	phospholipid biosynthetic process	7/151	269/18862	0.00601172	0.105664	0.089708	10400/253558/3422/54344/8895/51604/11261	7
BP	GO:0106106	cold-induced thermogenesis	5/151	144/18862	0.00607683	0.105664	0.089708	10400/6319/26580/216/153	5
BP	GO:0120161	regulation of cold-induced thermogenesis	5/151	144/18862	0.00607683	0.105664	0.089708	10400/6319/26580/216/153	5
BP	GO:0032328	alanine transport	2/151	15/18862	0.00624313	0.105664	0.089708	23428/6520	2
BP	GO:0050746	regulation of lipoprotein metabolic process	2/151	15/18862	0.00624313	0.105664	0.089708	10400/1622	2
BP	GO:0010712	regulation of collagen metabolic process	3/151	47/18862	0.00630306	0.105664	0.089708	2191/7431/3688	3
BP	GO:0030574	collagen catabolic process	3/151	47/18862	0.00630306	0.105664	0.089708	2191/4325/3688	3
BP	GO:0031952	regulation of protein autophosphorylation	3/151	47/18862	0.00630306	0.105664	0.089708	92597/5912/11261	3
BP	GO:0035722	interleukin-12-mediated signaling pathway	3/151	47/18862	0.00630306	0.105664	0.089708	302/829/27250	3
BP	GO:0097028	dendritic cell differentiation	3/151	47/18862	0.00630306	0.105664	0.089708	28959/3106/55365	3
BP	GO:0034764	positive regulation of transmembrane transport	6/151	207/18862	0.00649538	0.107014	0.0908541	783/3759/481/5174/3688/11261	6
BP	GO:0034767	positive regulation of ion transmembrane transport	6/151	207/18862	0.00649538	0.107014	0.0908541	783/3759/481/5174/3688/11261	6
BP	GO:0002367	cytokine production involved in immune response	4/151	93/18862	0.00664205	0.107014	0.0908541	567/3133/1113/3105	4
BP	GO:0002715	regulation of natural killer cell mediated immunity	3/151	48/18862	0.00668433	0.107014	0.0908541	3133/3106/3105	3
BP	GO:0045540	regulation of cholesterol biosynthetic process	3/151	48/18862	0.00668433	0.107014	0.0908541	1595/3422/6319	3
BP	GO:0106118	regulation of sterol biosynthetic process	3/151	48/18862	0.00668433	0.107014	0.0908541	1595/3422/6319	3
BP	GO:0006644	phospholipid metabolic process	9/151	419/18862	0.0066939	0.107014	0.0908541	10400/253558/3422/1622/54344/8895/51604/5168/11261	9
BP	GO:0015837	amine transport	4/151	94/18862	0.00689489	0.107945	0.0916447	1392/1113/5999/3688	4
BP	GO:0008203	cholesterol metabolic process	5/151	149/18862	0.00699993	0.107945	0.0916447	1595/3422/6319/8431/6307	5
BP	GO:0001666	response to hypoxia	8/151	348/18862	0.00704009	0.107945	0.0916447	25994/1803/3939/481/9124/23576/5691/7314	8
BP	GO:0071349	cellular response to interleukin-12	3/151	49/18862	0.00707904	0.107945	0.0916447	302/829/27250	3
BP	GO:0002693	positive regulation of cellular extravasation	2/151	16/18862	0.00709774	0.107945	0.0916447	83692/4267	2
BP	GO:0072673	lamellipodium morphogenesis	2/151	16/18862	0.00709774	0.107945	0.0916447	5168/960	2
BP	GO:2000651	positive regulation of sodium ion transmembrane transporter activity	2/151	16/18862	0.00709774	0.107945	0.0916447	481/11261	2
BP	GO:0006612	protein targeting to membrane	6/151	211/18862	0.00710988	0.107945	0.0916447	64374/6745/5174/6144/6746/11261	6
BP	GO:0060047	heart contraction	7/151	279/18862	0.00728977	0.109719	0.0931507	5349/783/153/1113/5999/3759/481	7
BP	GO:0045785	positive regulation of cell adhesion	9/151	425/18862	0.00731762	0.109719	0.0931507	3485/1803/54453/3133/4179/811/10085/3105/960	9
BP	GO:0002793	positive regulation of peptide secretion	5/151	151/18862	0.00739521	0.109756	0.0931824	2641/169026/1392/25874/8431	5
BP	GO:0048260	positive regulation of receptor-mediated endocytosis	3/151	50/18862	0.00748732	0.109756	0.0931824	567/302/1191	3
BP	GO:0070671	response to interleukin-12	3/151	50/18862	0.00748732	0.109756	0.0931824	302/829/27250	3
BP	GO:0002027	regulation of heart rate	4/151	97/18862	0.00769144	0.109756	0.0931824	783/153/5999/3759	4
BP	GO:0120162	positive regulation of cold-induced thermogenesis	4/151	97/18862	0.00769144	0.109756	0.0931824	10400/6319/26580/153	4
BP	GO:1990845	adaptive thermogenesis	5/151	153/18862	0.00780581	0.109756	0.0931824	10400/6319/26580/216/153	5
BP	GO:0031341	regulation of cell killing	4/151	98/18862	0.00796983	0.109756	0.0931824	567/3133/3106/3105	4
BP	GO:0046942	carboxylic acid transport	7/151	284/18862	0.00799959	0.109756	0.0931824	2744/23428/25874/8431/5999/6520/3688	7
BP	GO:0003085	negative regulation of systemic arterial blood pressure	2/151	17/18862	0.00800211	0.109756	0.0931824	1392/153	2
BP	GO:0007379	segment specification	2/151	17/18862	0.00800211	0.109756	0.0931824	9935/153572	2
BP	GO:0010715	regulation of extracellular matrix disassembly	2/151	17/18862	0.00800211	0.109756	0.0931824	2191/1803	2
BP	GO:0016045	detection of bacterium	2/151	17/18862	0.00800211	0.109756	0.0931824	3106/3105	2
BP	GO:0033631	cell-cell adhesion mediated by integrin	2/151	17/18862	0.00800211	0.109756	0.0931824	1803/3688	2
BP	GO:0045187	regulation of circadian sleep/wake cycle, sleep	2/151	17/18862	0.00800211	0.109756	0.0931824	1392/153	2
BP	GO:0070593	dendrite self-avoidance	2/151	17/18862	0.00800211	0.109756	0.0931824	152330/23022	2
BP	GO:0002824	positive regulation of adaptive immune response based on somatic recombination of immune receptors built from immunoglobulin superfamily domains	4/151	99/18862	0.00825476	0.111949	0.0950444	567/3133/3106/3105	4
BP	GO:0042102	positive regulation of T cell proliferation	4/151	99/18862	0.00825476	0.111949	0.0950444	3485/3133/4179/3105	4
BP	GO:0043266	regulation of potassium ion transport	4/151	100/18862	0.00854629	0.113185	0.0960935	5999/3759/481/3688	4
BP	GO:0036293	response to decreased oxygen levels	8/151	360/18862	0.00855101	0.113185	0.0960935	25994/1803/3939/481/9124/23576/5691/7314	8
BP	GO:0003015	heart process	7/151	289/18862	0.00875924	0.113185	0.0960935	5349/783/153/1113/5999/3759/481	7
BP	GO:0002704	negative regulation of leukocyte mediated immunity	3/151	53/18862	0.00879453	0.113185	0.0960935	3133/3106/3105	3
BP	GO:0002720	positive regulation of cytokine production involved in immune response	3/151	53/18862	0.00879453	0.113185	0.0960935	567/3133/3105	3
BP	GO:0035384	thioester biosynthetic process	3/151	53/18862	0.00879453	0.113185	0.0960935	25874/6319/9524	3
BP	GO:0071616	acyl-CoA biosynthetic process	3/151	53/18862	0.00879453	0.113185	0.0960935	25874/6319/9524	3
BP	GO:1902743	regulation of lamellipodium organization	3/151	53/18862	0.00879453	0.113185	0.0960935	51196/5168/960	3
BP	GO:0009743	response to carbohydrate	6/151	221/18862	0.00882907	0.113185	0.0960935	2641/169026/1392/3939/25874/8431	6
BP	GO:1902106	negative regulation of leukocyte differentiation	4/151	101/18862	0.00884449	0.113185	0.0960935	9935/3149/28959/55365	4
BP	GO:1902652	secondary alcohol metabolic process	5/151	158/18862	0.00890122	0.113185	0.0960935	1595/3422/6319/8431/6307	5
BP	GO:1903522	regulation of blood circulation	7/151	290/18862	0.00891732	0.113185	0.0960935	5349/783/153/1113/5999/3759/481	7
BP	GO:0030214	hyaluronan catabolic process	2/151	18/18862	0.0089554	0.113185	0.0960935	11261/960	2
BP	GO:0098869	cellular oxidant detoxification	4/151	102/18862	0.0091494	0.115035	0.0976638	2878/10549/25824/2938	4
BP	GO:2001234	negative regulation of apoptotic signaling pathway	6/151	224/18862	0.00939832	0.117552	0.0998011	292/8743/2537/1191/7857/960	6
BP	GO:0032414	positive regulation of ion transmembrane transporter activity	4/151	103/18862	0.0094611	0.117727	0.0999498	783/481/5174/11261	4
BP	GO:0001836	release of cytochrome c from mitochondria	3/151	55/18862	0.00973562	0.118989	0.101021	8743/2537/1191	3
BP	GO:0002821	positive regulation of adaptive immune response	4/151	104/18862	0.00977962	0.118989	0.101021	567/3133/3106/3105	4
BP	GO:0006906	vesicle fusion	4/151	104/18862	0.00977962	0.118989	0.101021	302/811/11261/6892	4
BP	GO:0010923	negative regulation of phosphatase activity	4/151	104/18862	0.00977962	0.118989	0.101021	5502/9749/81706/11261	4
BP	GO:0038092	nodal signaling pathway	2/151	19/18862	0.00995679	0.118989	0.101021	55997/653275	2
BP	GO:0098543	detection of other organism	2/151	19/18862	0.00995679	0.118989	0.101021	3106/3105	2
BP	GO:1900221	regulation of amyloid-beta clearance	2/151	19/18862	0.00995679	0.118989	0.101021	1595/1191	2
BP	GO:2001185	regulation of CD8-positive, alpha-beta T cell activation	2/151	19/18862	0.00995679	0.118989	0.101021	3133/3105	2
BP	GO:0006637	acyl-CoA metabolic process	4/151	105/18862	0.010105	0.118993	0.101025	25874/6319/1622/9524	4
BP	GO:0035383	thioester metabolic process	4/151	105/18862	0.010105	0.118993	0.101025	25874/6319/1622/9524	4
BP	GO:1903707	negative regulation of hemopoiesis	4/151	105/18862	0.010105	0.118993	0.101025	9935/3149/28959/55365	4
BP	GO:0042743	hydrogen peroxide metabolic process	3/151	56/18862	0.0102273	0.119269	0.101259	2878/10549/25824	3
BP	GO:0051289	protein homotetramerization	3/151	56/18862	0.0102273	0.119269	0.101259	2744/567/3759	3
BP	GO:0006066	alcohol metabolic process	8/151	373/18862	0.0104496	0.121275	0.102962	7276/51196/1595/3422/6319/216/8431/6307	8
BP	GO:0016125	sterol metabolic process	5/151	165/18862	0.0106071	0.122019	0.103594	1595/3422/6319/8431/6307	5
BP	GO:0098657	import into cell	6/151	230/18862	0.0106148	0.122019	0.103594	23428/5999/6520/3759/481/3688	6
BP	GO:0061178	regulation of insulin secretion involved in cellular response to glucose stimulus	3/151	57/18862	0.0107332	0.122429	0.103942	2641/1392/25874	3
BP	GO:0015711	organic anion transport	8/151	376/18862	0.0109289	0.122429	0.103942	2744/23428/292/25874/8431/5999/6520/3688	8
BP	GO:0002726	positive regulation of T cell cytokine production	2/151	20/18862	0.0110055	0.122429	0.103942	567/3105	2
BP	GO:0010226	response to lithium ion	2/151	20/18862	0.0110055	0.122429	0.103942	3485/811	2
BP	GO:0021854	hypothalamus development	2/151	20/18862	0.0110055	0.122429	0.103942	1392/7314	2
BP	GO:0050802	circadian sleep/wake cycle, sleep	2/151	20/18862	0.0110055	0.122429	0.103942	1392/153	2
BP	GO:0090280	positive regulation of calcium ion import	2/151	20/18862	0.0110055	0.122429	0.103942	2641/1392	2
BP	GO:0002708	positive regulation of lymphocyte mediated immunity	4/151	108/18862	0.0111232	0.122716	0.104185	567/3133/3106/3105	4
BP	GO:0006665	sphingolipid metabolic process	5/151	167/18862	0.0111329	0.122716	0.104185	10400/25870/8879/9524/5168	5
BP	GO:0006790	sulfur compound metabolic process	8/151	378/18862	0.0112574	0.123525	0.104872	10400/50859/25874/6319/1622/9060/9524/2938	8
BP	GO:0042129	regulation of T cell proliferation	5/151	168/18862	0.0114023	0.124331	0.105556	3485/3133/4004/4179/3105	5
BP	GO:0032963	collagen metabolic process	4/151	109/18862	0.0114767	0.124331	0.105556	2191/7431/4325/3688	4
BP	GO:1903039	positive regulation of leukocyte cell-cell adhesion	6/151	234/18862	0.0114854	0.124331	0.105556	3485/1803/3133/4179/3105/960	6
BP	GO:0018208	peptidyl-proline modification	3/151	59/18862	0.0117878	0.125855	0.106851	51303/2286/10549	3
BP	GO:0006613	cotranslational protein targeting to membrane	4/151	110/18862	0.0118374	0.125855	0.106851	64374/6745/6144/6746	4
BP	GO:0035305	negative regulation of dephosphorylation	4/151	110/18862	0.0118374	0.125855	0.106851	5502/9749/81706/11261	4
BP	GO:0090174	organelle membrane fusion	4/151	110/18862	0.0118374	0.125855	0.106851	302/811/11261/6892	4
BP	GO:0072521	purine-containing compound metabolic process	9/151	460/18862	0.0118869	0.125855	0.106851	7276/10400/3939/25874/6319/10591/1622/9060/9524	9
BP	GO:0042749	regulation of circadian sleep/wake cycle	2/151	21/18862	0.0121006	0.125909	0.106896	1392/153	2
BP	GO:0046641	positive regulation of alpha-beta T cell proliferation	2/151	21/18862	0.0121006	0.125909	0.106896	3133/3105	2
BP	GO:0071636	positive regulation of transforming growth factor beta production	2/151	21/18862	0.0121006	0.125909	0.106896	10159/4179	2
BP	GO:1902307	positive regulation of sodium ion transmembrane transport	2/151	21/18862	0.0121006	0.125909	0.106896	481/11261	2
BP	GO:0001659	temperature homeostasis	5/151	171/18862	0.0122372	0.126242	0.107179	10400/6319/26580/216/153	5
BP	GO:0035725	sodium ion transmembrane transport	5/151	171/18862	0.0122372	0.126242	0.107179	53827/5349/6520/481/11261	5
BP	GO:0032515	negative regulation of phosphoprotein phosphatase activity	3/151	60/18862	0.0123367	0.126727	0.107591	5502/9749/81706	3
BP	GO:0070482	response to oxygen levels	8/151	385/18862	0.012465	0.127502	0.108249	25994/1803/3939/481/9124/23576/5691/7314	8
BP	GO:0032411	positive regulation of transporter activity	4/151	112/18862	0.0125804	0.127702	0.108418	783/481/5174/11261	4
BP	GO:0006814	sodium ion transport	6/151	239/18862	0.0126432	0.127702	0.108418	55089/53827/5349/6520/481/11261	6
BP	GO:0009636	response to toxic substance	6/151	239/18862	0.0126432	0.127702	0.108418	2878/23428/10549/5174/25824/2938	6
BP	GO:0090181	regulation of cholesterol metabolic process	3/151	61/18862	0.0129001	0.129307	0.109781	1595/3422/6319	3
BP	GO:0051222	positive regulation of protein transport	7/151	312/18862	0.0129511	0.129307	0.109781	2641/169026/1392/25874/8431/5174/11261	7
BP	GO:0001909	leukocyte mediated cytotoxicity	4/151	113/18862	0.0129629	0.129307	0.109781	567/3133/3106/3105	4
BP	GO:0030277	maintenance of gastrointestinal epithelium	2/151	22/18862	0.0132414	0.130468	0.110767	56667/11171	2
BP	GO:0051590	positive regulation of neurotransmitter transport	2/151	22/18862	0.0132414	0.130468	0.110767	783/3688	2
BP	GO:0086012	membrane depolarization during cardiac muscle cell action potential	2/151	22/18862	0.0132414	0.130468	0.110767	783/3759	2
BP	GO:0016101	diterpenoid metabolic process	4/151	114/18862	0.0133527	0.13103	0.111244	7276/6383/1392/216	4
BP	GO:0006027	glycosaminoglycan catabolic process	3/151	62/18862	0.0134779	0.131724	0.111833	6383/11261/960	3
BP	GO:0006941	striated muscle contraction	5/151	176/18862	0.0137194	0.132768	0.11272	783/1113/3759/481/10324	5
BP	GO:0030004	cellular monovalent inorganic cation homeostasis	4/151	115/18862	0.0137498	0.132768	0.11272	10159/3759/481/11261	4
BP	GO:1990748	cellular detoxification	4/151	115/18862	0.0137498	0.132768	0.11272	2878/10549/25824/2938	4
BP	GO:0030198	extracellular matrix organization	8/151	393/18862	0.0139589	0.133996	0.113762	2191/7276/84171/1803/4325/10549/3688/960	8
BP	GO:0008217	regulation of blood pressure	5/151	177/18862	0.0140297	0.133996	0.113762	1392/10159/153/1113/23576	5
BP	GO:0045665	negative regulation of neuron differentiation	3/151	63/18862	0.0140703	0.133996	0.113762	152330/567/811	3
BP	GO:0010951	negative regulation of endopeptidase activity	6/151	245/18862	0.0141382	0.133996	0.113762	50859/302/2537/5274/25824/960	6
BP	GO:0043062	extracellular structure organization	8/151	394/18862	0.0141545	0.133996	0.113762	2191/7276/84171/1803/4325/10549/3688/960	8
BP	GO:0042110	T cell activation	9/151	474/18862	0.0142155	0.134047	0.113805	9935/3485/1803/567/3133/4004/4179/3105/960	9
BP	GO:0002021	response to dietary excess	2/151	23/18862	0.014427	0.134988	0.114604	7425/153	2
BP	GO:0022410	circadian sleep/wake cycle process	2/151	23/18862	0.014427	0.134988	0.114604	1392/153	2
BP	GO:0045229	external encapsulating structure organization	8/151	396/18862	0.0145516	0.135628	0.115147	2191/7276/84171/1803/4325/10549/3688/960	8
BP	GO:0001906	cell killing	5/151	179/18862	0.0146645	0.135752	0.115252	567/3133/1113/3106/3105	5
BP	GO:0042267	natural killer cell mediated cytotoxicity	3/151	64/18862	0.0146774	0.135752	0.115252	3133/3106/3105	3
BP	GO:0008637	apoptotic mitochondrial changes	4/151	118/18862	0.0149862	0.137554	0.116783	292/8743/2537/1191	4
BP	GO:0051928	positive regulation of calcium ion transport	4/151	118/18862	0.0149862	0.137554	0.116783	2641/1392/783/481	4
BP	GO:0035308	negative regulation of protein dephosphorylation	3/151	65/18862	0.015299	0.138842	0.117876	5502/9749/81706	3
BP	GO:0035773	insulin secretion involved in cellular response to glucose stimulus	3/151	65/18862	0.015299	0.138842	0.117876	2641/1392/25874	3
BP	GO:0045824	negative regulation of innate immune response	3/151	65/18862	0.015299	0.138842	0.117876	3133/3106/3105	3
BP	GO:0098581	detection of external biotic stimulus	2/151	24/18862	0.0156568	0.141556	0.120181	3106/3105	2
BP	GO:0015807	L-amino acid transport	3/151	66/18862	0.0159354	0.143004	0.12141	23428/6520/3688	3
BP	GO:0030193	regulation of blood coagulation	3/151	66/18862	0.0159354	0.143004	0.12141	2191/2152/79001	3
BP	GO:0002683	negative regulation of immune system process	8/151	403/18862	0.0160056	0.143102	0.121493	9935/3149/1803/3133/28959/3106/3105/55365	8
BP	GO:0030001	metal ion transport	9/151	486/18862	0.0164672	0.14544	0.123478	2641/169026/1392/302/783/5999/6520/3759/481	9
BP	GO:0002228	natural killer cell mediated immunity	3/151	67/18862	0.0165865	0.14544	0.123478	3133/3106/3105	3
BP	GO:0033555	multicellular organismal response to stress	3/151	67/18862	0.0165865	0.14544	0.123478	1803/1392/153	3
BP	GO:1900046	regulation of hemostasis	3/151	67/18862	0.0165865	0.14544	0.123478	2191/2152/79001	3
BP	GO:1904951	positive regulation of establishment of protein localization	7/151	328/18862	0.0166132	0.14544	0.123478	2641/169026/1392/25874/8431/5174/11261	7
BP	GO:0097237	cellular response to toxic substance	4/151	122/18862	0.0167409	0.14544	0.123478	2878/10549/25824/2938	4
BP	GO:0050927	positive regulation of positive chemotaxis	2/151	25/18862	0.0169299	0.14544	0.123478	2152/7857	2
BP	GO:0050995	negative regulation of lipid catabolic process	2/151	25/18862	0.0169299	0.14544	0.123478	5140/26580	2
BP	GO:0086013	membrane repolarization during cardiac muscle cell action potential	2/151	25/18862	0.0169299	0.14544	0.123478	3759/481	2
BP	GO:1900120	regulation of receptor binding	2/151	25/18862	0.0169299	0.14544	0.123478	567/302	2
BP	GO:1990000	amyloid fibril formation	2/151	25/18862	0.0169299	0.14544	0.123478	567/1191	2
BP	GO:0006026	aminoglycan catabolic process	3/151	68/18862	0.0172523	0.147685	0.125384	6383/11261/960	3
BP	GO:0010466	negative regulation of peptidase activity	6/151	257/18862	0.0174903	0.149193	0.126664	50859/302/2537/5274/25824/960	6
BP	GO:0006721	terpenoid metabolic process	4/151	124/18862	0.0176645	0.150148	0.127475	7276/6383/1392/216	4
BP	GO:1903131	mononuclear cell differentiation	8/151	411/18862	0.0177932	0.150712	0.127954	9935/3149/567/28959/3106/4179/55365/3688	8
BP	GO:1905952	regulation of lipid localization	5/151	189/18862	0.0181278	0.150838	0.12806	1392/10226/302/1622/3688	5
BP	GO:0002705	positive regulation of leukocyte mediated immunity	4/151	125/18862	0.0181379	0.150838	0.12806	567/3133/3106/3105	4
BP	GO:0002026	regulation of the force of heart contraction	2/151	26/18862	0.0182455	0.150838	0.12806	153/1113	2
BP	GO:0010460	positive regulation of heart rate	2/151	26/18862	0.0182455	0.150838	0.12806	153/5999	2
BP	GO:0042745	circadian sleep/wake cycle	2/151	26/18862	0.0182455	0.150838	0.12806	1392/153	2
BP	GO:0050926	regulation of positive chemotaxis	2/151	26/18862	0.0182455	0.150838	0.12806	2152/7857	2
BP	GO:0071880	adenylate cyclase-activating adrenergic receptor signaling pathway	2/151	26/18862	0.0182455	0.150838	0.12806	153/1113	2
BP	GO:0045471	response to ethanol	4/151	126/18862	0.0186192	0.152955	0.129858	10400/1392/8431/5999	4
BP	GO:0045123	cellular extravasation	3/151	70/18862	0.0186283	0.152955	0.129858	83692/4267/3688	3
BP	GO:0050821	protein stabilization	5/151	191/18862	0.0188799	0.154495	0.131165	1191/481/811/5217/11261	5
BP	GO:0043627	response to estrogen	3/151	71/18862	0.0193385	0.157182	0.133447	3485/1392/3939	3
BP	GO:0050818	regulation of coagulation	3/151	71/18862	0.0193385	0.157182	0.133447	2191/2152/79001	3
BP	GO:0009065	glutamine family amino acid catabolic process	2/151	27/18862	0.0196029	0.158135	0.134256	2744/23576	2
BP	GO:0036037	CD8-positive, alpha-beta T cell activation	2/151	27/18862	0.0196029	0.158135	0.134256	3133/3105	2
BP	GO:0044272	sulfur compound biosynthetic process	5/151	193/18862	0.0196523	0.158135	0.134256	25874/6319/9060/9524/2938	5
BP	GO:0030032	lamellipodium assembly	3/151	72/18862	0.0200636	0.159846	0.135709	51196/3983/3688	3
BP	GO:0033627	cell adhesion mediated by integrin	3/151	72/18862	0.0200636	0.159846	0.135709	1803/5140/3688	3
BP	GO:0043154	negative regulation of cysteine-type endopeptidase activity involved in apoptotic process	3/151	72/18862	0.0200636	0.159846	0.135709	2537/25824/960	3
BP	GO:0045017	glycerolipid biosynthetic process	6/151	266/18862	0.0203379	0.161499	0.137112	10400/51196/253558/54344/8895/51604	6
BP	GO:0042098	T cell proliferation	5/151	195/18862	0.0204452	0.161818	0.137383	3485/3133/4004/4179/3105	5
BP	GO:0002507	tolerance induction	2/151	28/18862	0.0210014	0.16354	0.138845	3133/3106	2
BP	GO:0072376	protein activation cascade	2/151	28/18862	0.0210014	0.16354	0.138845	2159/2152	2
BP	GO:0072378	blood coagulation, fibrin clot formation	2/151	28/18862	0.0210014	0.16354	0.138845	2159/2152	2
BP	GO:0086011	membrane repolarization during action potential	2/151	28/18862	0.0210014	0.16354	0.138845	3759/481	2
BP	GO:1902253	regulation of intrinsic apoptotic signaling pathway by p53 class mediator	2/151	28/18862	0.0210014	0.16354	0.138845	7314/960	2
BP	GO:0061041	regulation of wound healing	4/151	131/18862	0.0211444	0.164124	0.139341	2191/2152/79001/3688	4
BP	GO:0052548	regulation of endopeptidase activity	8/151	426/18862	0.0215254	0.165672	0.140655	50859/302/8743/2537/2152/5274/25824/960	8
BP	GO:0006650	glycerophospholipid metabolic process	7/151	346/18862	0.0215497	0.165672	0.140655	10400/253558/1622/54344/8895/51604/5168	7
BP	GO:0045861	negative regulation of proteolysis	7/151	346/18862	0.0215497	0.165672	0.140655	50859/302/2537/5274/25824/960/9528	7
BP	GO:1903532	positive regulation of secretion by cell	6/151	271/18862	0.022049	0.167711	0.142386	2641/169026/1392/25874/783/8431	6
BP	GO:2001233	regulation of apoptotic signaling pathway	7/151	348/18862	0.0221549	0.167711	0.142386	292/8743/2537/1191/7857/7314/960	7
BP	GO:0042157	lipoprotein metabolic process	4/151	133/18862	0.0222105	0.167711	0.142386	10400/1622/54344/51604	4
BP	GO:0055117	regulation of cardiac muscle contraction	3/151	75/18862	0.0223278	0.167711	0.142386	1113/3759/481	3
BP	GO:1902930	regulation of alcohol biosynthetic process	3/151	75/18862	0.0223278	0.167711	0.142386	1595/3422/6319	3
BP	GO:0010669	epithelial structure maintenance	2/151	29/18862	0.0224402	0.167711	0.142386	56667/11171	2
BP	GO:0055075	potassium ion homeostasis	2/151	29/18862	0.0224402	0.167711	0.142386	3759/481	2
BP	GO:1900117	regulation of execution phase of apoptosis	2/151	29/18862	0.0224402	0.167711	0.142386	2641/2191	2
BP	GO:1902624	positive regulation of neutrophil migration	2/151	29/18862	0.0224402	0.167711	0.142386	83692/4267	2
BP	GO:0008584	male gonad development	4/151	134/18862	0.0227556	0.169543	0.143941	8743/10549/8879/7314	4
BP	GO:0042391	regulation of membrane potential	8/151	431/18862	0.0228846	0.16998	0.144312	83795/783/2537/153/5999/3759/481/7314	8
BP	GO:0002792	negative regulation of peptide secretion	3/151	76/18862	0.0231122	0.17047	0.144728	1392/1595/1113	3
BP	GO:0086001	cardiac muscle cell action potential	3/151	76/18862	0.0231122	0.17047	0.144728	783/3759/481	3
BP	GO:0046546	development of primary male sexual characteristics	4/151	135/18862	0.0233088	0.17047	0.144728	8743/10549/8879/7314	4
BP	GO:0050671	positive regulation of lymphocyte proliferation	4/151	135/18862	0.0233088	0.17047	0.144728	3485/3133/4179/3105	4
BP	GO:0060048	cardiac muscle contraction	4/151	135/18862	0.0233088	0.17047	0.144728	783/1113/3759/481	4
BP	GO:0006936	muscle contraction	7/151	352/18862	0.0234004	0.17047	0.144728	51196/7431/783/1113/3759/481/10324	7
BP	GO:0046486	glycerolipid metabolic process	8/151	433/18862	0.0234449	0.17047	0.144728	10400/51196/253558/1622/54344/8895/51604/5168	8
BP	GO:0022409	positive regulation of cell-cell adhesion	6/151	276/18862	0.0238549	0.171334	0.145462	3485/1803/3133/4179/3105/960	6
BP	GO:0032946	positive regulation of mononuclear cell proliferation	4/151	136/18862	0.0238702	0.171334	0.145462	3485/3133/4179/3105	4
BP	GO:0061418	regulation of transcription from RNA polymerase II promoter in response to hypoxia	3/151	77/18862	0.0239115	0.171334	0.145462	25994/5691/7314	3
BP	GO:0090314	positive regulation of protein targeting to membrane	2/151	30/18862	0.0239186	0.171334	0.145462	5174/11261	2
BP	GO:1902230	negative regulation of intrinsic apoptotic signaling pathway in response to DNA damage	2/151	30/18862	0.0239186	0.171334	0.145462	1191/960	2
BP	GO:0090150	establishment of protein localization to membrane	7/151	354/18862	0.024041	0.171701	0.145773	64374/6745/481/5174/6144/6746/11261	7
BP	GO:0043542	endothelial cell migration	6/151	278/18862	0.0246042	0.175037	0.148606	2191/1803/54453/5646/811/7857	6
BP	GO:0043281	regulation of cysteine-type endopeptidase activity involved in apoptotic process	5/151	205/18862	0.0247234	0.175037	0.148606	8743/2537/2152/25824/960	5
BP	GO:0032272	negative regulation of protein polymerization	3/151	78/18862	0.0247257	0.175037	0.148606	829/22919/5217	3
BP	GO:1902105	regulation of leukocyte differentiation	6/151	279/18862	0.0249848	0.17607	0.149483	9935/3149/28959/3106/4179/55365	6
BP	GO:0007586	digestion	4/151	138/18862	0.0250175	0.17607	0.149483	1392/5646/56667/11171	4
BP	GO:0002347	response to tumor cell	2/151	31/18862	0.0254359	0.176443	0.149799	347252/3105	2
BP	GO:0030431	sleep	2/151	31/18862	0.0254359	0.176443	0.149799	1392/153	2
BP	GO:0046949	fatty-acyl-CoA biosynthetic process	2/151	31/18862	0.0254359	0.176443	0.149799	6319/9524	2
BP	GO:0051955	regulation of amino acid transport	2/151	31/18862	0.0254359	0.176443	0.149799	5999/3688	2
BP	GO:0071875	adrenergic receptor signaling pathway	2/151	31/18862	0.0254359	0.176443	0.149799	153/1113	2
BP	GO:0031333	negative regulation of protein-containing complex assembly	4/151	139/18862	0.0256034	0.177096	0.150354	829/1191/22919/5217	4
BP	GO:0072593	reactive oxygen species metabolic process	6/151	281/18862	0.0257576	0.177654	0.150827	2878/2537/10549/1191/23576/25824	6
BP	GO:0046718	viral entry into host cell	4/151	140/18862	0.0261975	0.180173	0.152966	1803/4360/4179/3688	4
BP	GO:0043687	post-translational protein modification	7/151	361/18862	0.0263782	0.180527	0.153266	6383/25870/7425/10324/5691/7857/1114	7
BP	GO:2000117	negative regulation of cysteine-type endopeptidase activity	3/151	80/18862	0.0263985	0.180527	0.153266	2537/25824/960	3
BP	GO:0006506	GPI anchor biosynthetic process	2/151	32/18862	0.0269914	0.183026	0.155388	54344/51604	2
BP	GO:0016486	peptide hormone processing	2/151	32/18862	0.0269914	0.183026	0.155388	10159/5126	2
BP	GO:0071353	cellular response to interleukin-4	2/151	32/18862	0.0269914	0.183026	0.155388	4360/10376	2
BP	GO:0008406	gonad development	5/151	212/18862	0.0280372	0.188018	0.159626	7425/8743/10549/8879/7314	5
BP	GO:0050870	positive regulation of T cell activation	5/151	212/18862	0.0280372	0.188018	0.159626	3485/1803/3133/4179/3105	5
BP	GO:0071805	potassium ion transmembrane transport	5/151	212/18862	0.0280372	0.188018	0.159626	83795/5999/3759/481/3688	5
BP	GO:0007159	leukocyte cell-cell adhesion	7/151	366/18862	0.0281398	0.188018	0.159626	3485/1803/3133/4179/3105/3688/960	7
BP	GO:0001662	behavioral fear response	2/151	33/18862	0.0285843	0.188018	0.159626	1803/1392	2
BP	GO:0002724	regulation of T cell cytokine production	2/151	33/18862	0.0285843	0.188018	0.159626	567/3105	2
BP	GO:0006505	GPI anchor metabolic process	2/151	33/18862	0.0285843	0.188018	0.159626	54344/51604	2
BP	GO:0015695	organic cation transport	2/151	33/18862	0.0285843	0.188018	0.159626	23428/5174	2
BP	GO:0030149	sphingolipid catabolic process	2/151	33/18862	0.0285843	0.188018	0.159626	8879/5168	2
BP	GO:0060323	head morphogenesis	2/151	33/18862	0.0285843	0.188018	0.159626	10159/8879	2
BP	GO:0140448	signaling receptor ligand precursor processing	2/151	33/18862	0.0285843	0.188018	0.159626	10159/5126	2
BP	GO:0051262	protein tetramerization	3/151	83/18862	0.0290188	0.189841	0.161174	2744/567/3759	3
BP	GO:0070509	calcium ion import	3/151	83/18862	0.0290188	0.189841	0.161174	2641/1392/783	3
BP	GO:0048284	organelle fusion	4/151	145/18862	0.0292922	0.191112	0.162253	302/811/11261/6892	4
BP	GO:0003012	muscle system process	8/151	453/18862	0.0295889	0.192527	0.163455	51196/7431/783/1113/5999/3759/481/10324	8
BP	GO:0002718	regulation of cytokine production involved in immune response	3/151	84/18862	0.0299217	0.19417	0.164849	567/3133/3105	3
BP	GO:0002209	behavioral defense response	2/151	34/18862	0.030214	0.194269	0.164934	1803/1392	2
BP	GO:0002691	regulation of cellular extravasation	2/151	34/18862	0.030214	0.194269	0.164934	83692/4267	2
BP	GO:0046640	regulation of alpha-beta T cell proliferation	2/151	34/18862	0.030214	0.194269	0.164934	3133/3105	2
BP	GO:0052547	regulation of peptidase activity	8/151	455/18862	0.030259	0.194269	0.164934	50859/302/8743/2537/2152/5274/25824/960	8
BP	GO:0045137	development of primary sexual characteristics	5/151	217/18862	0.0305692	0.195222	0.165743	7425/8743/10549/8879/7314	5
BP	GO:1903792	negative regulation of anion transport	5/151	217/18862	0.0305692	0.195222	0.165743	1392/1595/1113/5999/11261	5
BP	GO:0042445	hormone metabolic process	5/151	218/18862	0.0310923	0.196957	0.167216	7276/10159/5126/216/8879	5
BP	GO:0097529	myeloid leukocyte migration	5/151	218/18862	0.0310923	0.196957	0.167216	1803/83692/4267/1113/7857	5
BP	GO:0046467	membrane lipid biosynthetic process	4/151	148/18862	0.0312488	0.196957	0.167216	10400/54344/8879/51604	4
BP	GO:0070665	positive regulation of leukocyte proliferation	4/151	148/18862	0.0312488	0.196957	0.167216	3485/3133/4179/3105	4
BP	GO:0097530	granulocyte migration	4/151	148/18862	0.0312488	0.196957	0.167216	1803/83692/4267/7857	4
BP	GO:0031647	regulation of protein stability	6/151	295/18862	0.0316163	0.197754	0.167892	1191/481/54344/811/5217/11261	6
BP	GO:0051047	positive regulation of secretion	6/151	295/18862	0.0316163	0.197754	0.167892	2641/169026/1392/25874/783/8431	6
BP	GO:0002699	positive regulation of immune effector process	5/151	219/18862	0.031621	0.197754	0.167892	567/3133/3106/4179/3105	5
BP	GO:0010765	positive regulation of sodium ion transport	2/151	35/18862	0.0318798	0.198071	0.168161	481/11261	2
BP	GO:0070670	response to interleukin-4	2/151	35/18862	0.0318798	0.198071	0.168161	4360/10376	2
BP	GO:0061337	cardiac conduction	4/151	149/18862	0.0319177	0.198071	0.168161	5349/783/3759/481	4
CC	GO:0030176	integral component of endoplasmic reticulum membrane	14/156	157/19520	3.14122e-11	8.11046e-09	6.20896e-09	567/3133/6319/26580/54344/3106/8879/811/28972/55161/51604/9524/3105/6892	14
CC	GO:0031227	intrinsic component of endoplasmic reticulum membrane	14/156	165/19520	6.14428e-11	8.11046e-09	6.20896e-09	567/3133/6319/26580/54344/3106/8879/811/28972/55161/51604/9524/3105/6892	14
CC	GO:0031301	integral component of organelle membrane	17/156	371/19520	7.56614e-09	6.65821e-07	5.09719e-07	567/3133/2110/25874/6319/26580/54344/3106/8879/811/28972/55161/51604/9524/3105/100131801/6892	17
CC	GO:0031300	intrinsic component of organelle membrane	17/156	402/19520	2.46745e-08	1.62852e-06	1.24671e-06	567/3133/2110/25874/6319/26580/54344/3106/8879/811/28972/55161/51604/9524/3105/100131801/6892	17
CC	GO:0005925	focal adhesion	16/156	416/19520	2.36857e-07	1.2506e-05	9.574e-06	2191/1803/83692/567/4267/23022/7431/9124/4179/8895/811/22919/64098/3688/11261/960	16
CC	GO:0030055	cell-substrate junction	16/156	423/19520	2.96337e-07	1.30388e-05	9.98187e-06	2191/1803/83692/567/4267/23022/7431/9124/4179/8895/811/22919/64098/3688/11261/960	16
CC	GO:0071556	integral component of lumenal side of endoplasmic reticulum membrane	5/156	29/19520	3.10938e-06	0.000102609	7.85527e-05	3133/3106/811/3105/6892	5
CC	GO:0098553	lumenal side of endoplasmic reticulum membrane	5/156	29/19520	3.10938e-06	0.000102609	7.85527e-05	3133/3106/811/3105/6892	5
CC	GO:0005788	endoplasmic reticulum lumen	12/156	306/19520	6.68266e-06	0.000196025	0.000150067	2641/6383/25870/567/7425/2159/1622/64374/1191/811/7857/1114	12
CC	GO:0098576	lumenal side of membrane	5/156	36/19520	9.4355e-06	0.000249097	0.000190696	3133/3106/811/3105/6892	5
CC	GO:0030670	phagocytic vesicle membrane	6/156	77/19520	3.51344e-05	0.000843225	0.000645531	567/3133/3106/811/3105/6892	6
CC	GO:0042611	MHC protein complex	4/156	25/19520	4.35608e-05	0.000958338	0.000733656	567/3133/3106/3105	4
CC	GO:0140534	endoplasmic reticulum protein-containing complex	7/156	127/19520	7.29193e-05	0.00148082	0.00113364	567/6748/811/28972/51604/3105/6892	7
CC	GO:0030133	transport vesicle	12/156	402/19520	9.65979e-05	0.00182156	0.0013945	169026/10226/567/7425/3133/23546/5126/1113/3106/3105/11261/1363	12
CC	GO:0045335	phagocytic vesicle	7/156	136/19520	0.000112184	0.00197444	0.00151153	567/7431/3133/3106/811/3105/6892	7
CC	GO:0030666	endocytic vesicle membrane	7/156	163/19520	0.000342071	0.00564417	0.00432089	567/3133/3106/811/3105/6892/7314	7
CC	GO:0045177	apical part of cell	11/156	414/19520	0.000509155	0.0078566	0.00601462	2191/60676/3485/1803/23428/10159/6520/481/5174/56667/960	11
CC	GO:0016324	apical plasma membrane	10/156	351/19520	0.000535677	0.0078566	0.00601462	60676/3485/1803/23428/10159/6520/481/5174/56667/960	10
CC	GO:0055038	recycling endosome membrane	5/156	87/19520	0.000666765	0.00910327	0.00696901	567/5912/3133/3106/3105	5
CC	GO:0031258	lamellipodium membrane	3/156	22/19520	0.000689641	0.00910327	0.00696901	2191/1803/960	3
CC	GO:0030667	secretory granule membrane	9/156	305/19520	0.000792735	0.00986584	0.0075528	169026/9749/84418/5912/10159/3106/4179/8895/960	9
CC	GO:0030139	endocytic vesicle	9/156	307/19520	0.000830175	0.00986584	0.0075528	1803/567/7431/3133/3106/811/3105/6892/7314	9
CC	GO:1905368	peptidase complex	5/156	92/19520	0.000859524	0.00986584	0.0075528	2191/2152/28972/51604/5691	5
CC	GO:0030134	COPII-coated ER to Golgi transport vesicle	5/156	94/19520	0.000947226	0.0104195	0.00797664	567/3133/222068/3106/3105	5
CC	GO:0030027	lamellipodium	7/156	196/19520	0.00102191	0.0107914	0.00826135	2191/51196/1803/3983/23022/3688/960	7
CC	GO:0030658	transport vesicle membrane	7/156	206/19520	0.00136244	0.013834	0.0105907	169026/567/3133/23546/3106/3105/1363	7
CC	GO:0012507	ER to Golgi transport vesicle membrane	4/156	62/19520	0.00152748	0.0149354	0.0114338	567/3133/3106/3105	4
CC	GO:0031253	cell projection membrane	9/156	337/19520	0.0015871	0.0149641	0.0114557	2191/10400/1803/23428/10159/5174/22919/3688/960	9
CC	GO:0005790	smooth endoplasmic reticulum	3/156	30/19520	0.00173503	0.0155145	0.0118772	10549/3759/811	3
CC	GO:0031252	cell leading edge	10/156	411/19520	0.00176301	0.0155145	0.0118772	2191/51196/1803/3983/23022/7431/10159/10324/3688/960	10
CC	GO:0005743	mitochondrial inner membrane	11/156	493/19520	0.00207741	0.0176915	0.0135437	25994/292/2110/25874/2537/1346/1191/4729/25915/100131801/1349	11
CC	GO:0005797	Golgi medial cisterna	2/156	11/19520	0.00332904	0.0274646	0.0210255	3105/9528	2
CC	GO:0042583	chromaffin granule	2/156	12/19520	0.00397395	0.0313723	0.0240171	1113/1191	2
CC	GO:0055037	recycling endosome	6/156	190/19520	0.00427974	0.0313723	0.0240171	567/5912/3133/3106/3105/3688	6
CC	GO:0034774	secretory granule lumen	8/156	322/19520	0.00443321	0.0313723	0.0240171	2641/7276/567/302/23406/10549/1191/5274	8
CC	GO:0042383	sarcolemma	5/156	134/19520	0.00446751	0.0313723	0.0240171	10400/783/3759/481/3688	5
CC	GO:0045121	membrane raft	8/156	323/19520	0.00451571	0.0313723	0.0240171	1803/5912/302/292/10376/481/5174/3688	8
CC	GO:0098857	membrane microdomain	8/156	323/19520	0.00451571	0.0313723	0.0240171	1803/5912/302/292/10376/481/5174/3688	8
CC	GO:0098992	neuronal dense core vesicle	2/156	13/19520	0.00467194	0.0314842	0.0241027	1113/7857	2
CC	GO:0060205	cytoplasmic vesicle lumen	8/156	326/19520	0.00477034	0.0314842	0.0241027	2641/7276/567/302/23406/10549/1191/5274	8
CC	GO:0031983	vesicle lumen	8/156	328/19520	0.00494612	0.0318482	0.0243814	2641/7276/567/302/23406/10549/1191/5274	8
CC	GO:0030315	T-tubule	3/156	51/19520	0.00787614	0.0495071	0.0379002	783/3759/481	3
CC	GO:0005796	Golgi lumen	4/156	102/19520	0.00910357	0.0556415	0.0425963	6383/2159/4325/56667	4
CC	GO:0070469	respirasome	4/156	103/19520	0.00941375	0.0556415	0.0425963	25994/1346/4729/1349	4
CC	GO:0031304	intrinsic component of mitochondrial inner membrane	3/156	55/19520	0.00969511	0.0556415	0.0425963	2110/25874/100131801	3
CC	GO:0031305	integral component of mitochondrial inner membrane	3/156	55/19520	0.00969511	0.0556415	0.0425963	2110/25874/100131801	3
CC	GO:0070820	tertiary granule	5/156	164/19520	0.0102921	0.0559538	0.0428355	567/84418/5912/10159/5646	5
CC	GO:0042470	melanosome	4/156	106/19520	0.0103854	0.0559538	0.0428355	302/6520/55161/3688	4
CC	GO:0048770	pigment granule	4/156	106/19520	0.0103854	0.0559538	0.0428355	302/6520/55161/3688	4
CC	GO:0031256	leading edge membrane	5/156	173/19520	0.0127444	0.0672905	0.0515143	2191/1803/10159/3688/960	5
CC	GO:0031233	intrinsic component of external side of plasma membrane	2/156	23/19520	0.0143828	0.0728099	0.0557396	2159/2152	2
CC	GO:0001725	stress fiber	3/156	64/19520	0.0146171	0.0728099	0.0557396	3983/23022/9124	3
CC	GO:0097517	contractile actin filament bundle	3/156	64/19520	0.0146171	0.0728099	0.0557396	3983/23022/9124	3
CC	GO:0045178	basal part of cell	6/156	258/19520	0.0176841	0.0857275	0.0656287	2191/23428/302/6520/481/960	6
CC	GO:0044291	cell-cell contact zone	3/156	69/19520	0.0178599	0.0857275	0.0656287	5912/3759/481	3
CC	GO:0031528	microvillus membrane	2/156	26/19520	0.0181899	0.0857522	0.0656476	23428/5174	2
CC	GO:0005793	endoplasmic reticulum-Golgi intermediate compartment	4/156	130/19520	0.0205236	0.0921257	0.0705269	222068/811/11261/6892	4
CC	GO:0032432	actin filament bundle	3/156	73/19520	0.0207193	0.0921257	0.0705269	3983/23022/9124	3
CC	GO:0070821	tertiary granule membrane	3/156	73/19520	0.0207193	0.0921257	0.0705269	84418/5912/10159	3
CC	GO:0031045	dense core granule	2/156	28/19520	0.0209377	0.0921257	0.0705269	1113/7857	2
CC	GO:0042641	actomyosin	3/156	74/19520	0.0214711	0.0929242	0.0711381	3983/23022/9124	3
CC	GO:0016323	basolateral plasma membrane	5/156	211/19520	0.0273985	0.116664	0.0893124	23428/302/6520/481/960	5
CC	GO:0032592	integral component of mitochondrial membrane	3/156	85/19520	0.0307171	0.128719	0.0985411	2110/25874/100131801	3
CC	GO:0098573	intrinsic component of mitochondrial membrane	3/156	86/19520	0.031646	0.129933	0.0994699	2110/25874/100131801	3
CC	GO:0005765	lysosomal membrane	7/156	378/19520	0.0324831	0.129933	0.0994699	1803/302/10159/6520/8895/51374/9528	7
CC	GO:0098852	lytic vacuole membrane	7/156	378/19520	0.0324831	0.129933	0.0994699	1803/302/10159/6520/8895/51374/9528	7
CC	GO:0005746	mitochondrial respirasome	3/156	89/19520	0.0345204	0.136021	0.104131	1346/4729/1349	3
CC	GO:0005902	microvillus	3/156	91/19520	0.0365094	0.141742	0.108511	23428/5174/960	3
CC	GO:0032994	protein-lipid complex	2/156	39/19520	0.0387754	0.148358	0.113576	1622/1191	2
CC	GO:0005811	lipid droplet	3/156	95/19520	0.0406603	0.153147	0.117242	10226/302/26580	3
CC	GO:0031901	early endosome membrane	4/156	162/19520	0.0411873	0.153147	0.117242	567/3133/3106/3105	4
CC	GO:0009925	basal plasma membrane	5/156	240/19520	0.0438092	0.160634	0.122973	23428/302/6520/481/960	5
CC	GO:0005775	vacuolar lumen	4/156	173/19520	0.0502691	0.181795	0.139173	7276/6383/2638/302	4
CC	GO:0001726	ruffle	4/156	175/19520	0.0520295	0.185619	0.1421	2191/23022/10324/3688	4
CC	GO:0014704	intercalated disc	2/156	48/19520	0.0563605	0.198389	0.151877	3759/481	2
MF	GO:0042605	peptide antigen binding	5/151	32/18337	5.96353e-06	0.00228403	0.00196483	23428/3133/3106/3105/6892	5
MF	GO:0098631	cell adhesion mediator activity	5/151	58/18337	0.00011424	0.021877	0.0188196	152330/302/23022/9124/3688	5
MF	GO:0003779	actin binding	12/151	439/18337	0.000284736	0.0363513	0.031271	53827/3983/9749/2638/23022/23406/783/829/9124/5217/64098/3688	12
MF	GO:0045296	cadherin binding	10/151	332/18337	0.000435179	0.0416684	0.035845	53827/10226/3939/302/829/6520/9124/4179/22919/3688	10
MF	GO:0098632	cell-cell adhesion mediator activity	4/151	49/18337	0.000701936	0.0537683	0.0462539	152330/302/23022/9124	4
MF	GO:0004601	peroxidase activity	4/151	53/18337	0.000945729	0.060369	0.0519321	2878/10549/25824/2938	4
MF	GO:0016684	oxidoreductase activity, acting on peroxide as acceptor	4/151	57/18337	0.00124371	0.0680489	0.0585387	2878/10549/25824/2938	4
MF	GO:0004252	serine-type endopeptidase activity	6/151	168/18337	0.0027	0.0845635	0.0727453	2191/1803/2159/5126/5646/2152	6
MF	GO:0008239	dipeptidyl-peptidase activity	2/151	10/18337	0.00290279	0.0845635	0.0727453	2191/1803	2
MF	GO:0051082	unfolded protein binding	5/151	120/18337	0.00316148	0.0845635	0.0727453	64374/1191/811/100131801/6892	5
MF	GO:0005179	hormone activity	5/151	122/18337	0.00339404	0.0845635	0.0727453	2641/7276/1392/7425/1114	5
MF	GO:0004175	endopeptidase activity	10/151	438/18337	0.00343843	0.0845635	0.0727453	2191/1803/2159/11274/5126/4325/5646/2152/5691/9528	10
MF	GO:0004865	protein serine/threonine phosphatase inhibitor activity	2/151	11/18337	0.00352874	0.0845635	0.0727453	5502/81706	2
MF	GO:0042608	T cell receptor binding	2/151	11/18337	0.00352874	0.0845635	0.0727453	3133/3105	2
MF	GO:0070697	activin receptor binding	2/151	11/18337	0.00352874	0.0845635	0.0727453	55997/653275	2
MF	GO:0001618	virus receptor activity	4/151	76/18337	0.00358106	0.0845635	0.0727453	1803/4360/4179/3688	4
MF	GO:0140272	exogenous protein binding	4/151	77/18337	0.00375347	0.0845635	0.0727453	1803/4360/4179/3688	4
MF	GO:0022858	alanine transmembrane transporter activity	2/151	12/18337	0.00421168	0.0854506	0.0735084	23428/6520	2
MF	GO:0008236	serine-type peptidase activity	6/151	186/18337	0.0044491	0.0854506	0.0735084	2191/1803/2159/5126/5646/2152	6
MF	GO:0002020	protease binding	5/151	131/18337	0.0045948	0.0854506	0.0735084	2191/1803/302/2152/3688	5
MF	GO:0017171	serine hydrolase activity	6/151	188/18337	0.00468528	0.0854506	0.0735084	2191/1803/2159/5126/5646/2152	6
MF	GO:0033218	amide binding	9/151	391/18337	0.00515751	0.0880085	0.0757088	23428/3133/2286/1622/1191/3106/811/3105/6892	9
MF	GO:0016209	antioxidant activity	4/151	86/18337	0.00556447	0.0880085	0.0757088	2878/10549/25824/2938	4
MF	GO:0004864	protein phosphatase inhibitor activity	3/151	44/18337	0.00566282	0.0880085	0.0757088	5502/9749/81706	3
MF	GO:0016863	intramolecular oxidoreductase activity, transposing C=C bonds	2/151	14/18337	0.00574468	0.0880085	0.0757088	3422/2938	2
MF	GO:0051371	muscle alpha-actinin binding	2/151	15/18337	0.00659284	0.0966003	0.0830999	23022/9124	2
MF	GO:0019212	phosphatase inhibitor activity	3/151	47/18337	0.00680995	0.0966003	0.0830999	5502/9749/81706	3
MF	GO:0008238	exopeptidase activity	4/151	95/18337	0.00788214	0.107816	0.0927485	2191/1803/4325/1363	4
MF	GO:0048038	quinone binding	2/151	18/18337	0.00945282	0.120681	0.103815	2110/79001	2
MF	GO:0098641	cadherin binding involved in cell-cell adhesion	2/151	18/18337	0.00945282	0.120681	0.103815	302/9124	2
MF	GO:0042288	MHC class I protein binding	2/151	20/18337	0.0116133	0.142027	0.122178	3133/6892	2
MF	GO:0003823	antigen binding	5/151	165/18337	0.0118665	0.142027	0.122178	23428/3133/3106/3105/6892	5
MF	GO:0004602	glutathione peroxidase activity	2/151	22/18337	0.0139686	0.16212	0.139463	2878/2938	2
MF	GO:0004857	enzyme inhibitor activity	8/151	385/18337	0.014545	0.163845	0.140947	5502/9749/50859/302/5274/25824/81706/11261	8
MF	GO:0005212	structural constituent of eye lens	2/151	23/18337	0.0152171	0.166273	0.143035	1412/7431	2
MF	GO:0042277	peptide binding	7/151	315/18337	0.0156288	0.166273	0.143035	23428/3133/1191/3106/811/3105/6892	7
MF	GO:0070696	transmembrane receptor protein serine/threonine kinase binding	2/151	24/18337	0.0165118	0.170919	0.147032	55997/653275	2
MF	GO:0048018	receptor ligand activity	9/151	486/18337	0.0193815	0.188395	0.162066	2641/7276/1803/1392/7425/54097/8743/7857/1114	9
MF	GO:0051393	alpha-actinin binding	2/151	27/18337	0.0206643	0.188395	0.162066	23022/9124	2
MF	GO:0030546	signaling receptor activator activity	9/151	492/18337	0.0207938	0.188395	0.162066	2641/7276/1803/1392/7425/54097/8743/7857/1114	9
MF	GO:0004129	cytochrome-c oxidase activity	2/151	28/18337	0.0221352	0.188395	0.162066	1346/1349	2
MF	GO:0015002	heme-copper terminal oxidase activity	2/151	28/18337	0.0221352	0.188395	0.162066	1346/1349	2
MF	GO:0016675	oxidoreductase activity, acting on a heme group of donors	2/151	28/18337	0.0221352	0.188395	0.162066	1346/1349	2
MF	GO:0016676	oxidoreductase activity, acting on a heme group of donors, oxygen as acceptor	2/151	28/18337	0.0221352	0.188395	0.162066	1346/1349	2
MF	GO:0033612	receptor serine/threonine kinase binding	2/151	28/18337	0.0221352	0.188395	0.162066	55997/653275	2
MF	GO:0005520	insulin-like growth factor binding	2/151	29/18337	0.0236482	0.19569	0.168341	3485/347252	2
MF	GO:0038024	cargo receptor activity	3/151	75/18337	0.0240142	0.19569	0.168341	84171/4360/5168	3
MF	GO:0003725	double-stranded RNA binding	3/151	76/18337	0.0248539	0.196991	0.169461	7431/10376/6520	3
MF	GO:0005184	neuropeptide hormone activity	2/151	30/18337	0.0252025	0.196991	0.169461	1392/7425	2

## Sheet: Table S3 go_MGrey_Alpha_cells
ONTOLOGY	ID	Description	GeneRatio	BgRatio	pvalue	p.adjust	qvalue	geneID	Count
BP	GO:0006614	SRP-dependent cotranslational protein targeting to membrane	28/146	105/18862	7.52151e-36	1.55244e-32	1.437e-32	6233/9349/6164/6138/6727/23521/6152/6143/6176/6206/6165/6208/6135/6194/6160/9045/6230/6147/6125/6191/6161/6156/6207/6224/6188/6124/11224/6205	28
BP	GO:0006613	cotranslational protein targeting to membrane	28/146	110/18862	3.27269e-35	3.37742e-32	3.12628e-32	6233/9349/6164/6138/6727/23521/6152/6143/6176/6206/6165/6208/6135/6194/6160/9045/6230/6147/6125/6191/6161/6156/6207/6224/6188/6124/11224/6205	28
BP	GO:0045047	protein targeting to ER	28/146	120/18862	4.95668e-34	3.4102e-31	3.15662e-31	6233/9349/6164/6138/6727/23521/6152/6143/6176/6206/6165/6208/6135/6194/6160/9045/6230/6147/6125/6191/6161/6156/6207/6224/6188/6124/11224/6205	28
BP	GO:0072599	establishment of protein localization to endoplasmic reticulum	28/146	124/18862	1.36607e-33	7.04893e-31	6.52479e-31	6233/9349/6164/6138/6727/23521/6152/6143/6176/6206/6165/6208/6135/6194/6160/9045/6230/6147/6125/6191/6161/6156/6207/6224/6188/6124/11224/6205	28
BP	GO:0000184	nuclear-transcribed mRNA catabolic process, nonsense-mediated decay	27/146	120/18862	2.33824e-32	9.65226e-30	8.93454e-30	6233/9349/6164/6138/23521/6152/6143/6176/6206/6165/6208/6135/6194/6160/9045/6230/6147/6125/6191/6161/6156/6207/6224/6188/6124/11224/6205	27
BP	GO:0070972	protein localization to endoplasmic reticulum	28/146	152/18862	6.60215e-31	2.27114e-28	2.10227e-28	6233/9349/6164/6138/6727/23521/6152/6143/6176/6206/6165/6208/6135/6194/6160/9045/6230/6147/6125/6191/6161/6156/6207/6224/6188/6124/11224/6205	28
BP	GO:0006612	protein targeting to membrane	29/146	211/18862	3.90954e-28	1.15276e-25	1.06704e-25	6233/9349/6164/6138/6727/23521/6152/6143/6176/6206/6165/6208/6135/6194/6160/9045/6230/6147/6125/6191/6161/6156/6207/6224/6188/6124/9847/11224/6205	29
BP	GO:0006413	translational initiation	28/146	193/18862	7.45725e-28	1.92397e-25	1.78091e-25	6233/9349/6164/6138/23521/6152/6143/6176/6206/6165/6208/6135/6194/6160/9045/6230/6147/6125/6191/6161/6156/6207/6224/6188/6124/11224/10209/6205	28
BP	GO:0019083	viral transcription	27/146	180/18862	2.80041e-27	6.42227e-25	5.94472e-25	6233/9349/6164/6138/23521/6152/6143/6176/6206/6165/6208/6135/6194/6160/9045/6230/6147/6125/6191/6161/6156/6207/6224/6188/6124/11224/6205	27
BP	GO:0000956	nuclear-transcribed mRNA catabolic process	28/146	208/18862	6.46439e-27	1.33425e-24	1.23504e-24	11340/6233/9349/6164/6138/23521/6152/6143/6176/6206/6165/6208/6135/6194/6160/9045/6230/6147/6125/6191/6161/6156/6207/6224/6188/6124/11224/6205	28
BP	GO:0019080	viral gene expression	27/146	198/18862	3.99738e-26	7.50053e-24	6.94281e-24	6233/9349/6164/6138/23521/6152/6143/6176/6206/6165/6208/6135/6194/6160/9045/6230/6147/6125/6191/6161/6156/6207/6224/6188/6124/11224/6205	27
BP	GO:0006605	protein targeting	33/146	441/18862	2.4479e-23	4.21039e-21	3.89732e-21	6233/9349/6164/6138/6727/23521/6152/6143/6176/6206/6165/6208/3295/6135/6194/6160/7316/9045/6230/6147/6125/6191/6161/6156/6207/6224/6188/6124/9847/11224/6205/9804/54543	33
BP	GO:0006402	mRNA catabolic process	31/146	375/18862	3.19244e-23	5.06862e-21	4.69173e-21	11340/6233/9349/6164/6138/23521/6152/6143/6176/6206/6165/6208/6135/6194/6160/7316/9045/6230/6147/6125/6191/6161/6156/6207/6224/6188/6124/5717/11224/6205/9698	31
BP	GO:0090150	establishment of protein localization to membrane	30/146	354/18862	8.54391e-23	1.25962e-20	1.16595e-20	6233/9349/6164/6138/6727/23521/6152/6143/6176/6206/6165/6208/6135/6194/6160/9045/6230/6147/6125/6191/6161/6156/6207/6224/6188/6124/9847/64112/11224/6205	30
BP	GO:0006401	RNA catabolic process	31/146	414/18862	6.13052e-22	8.43559e-20	7.80834e-20	11340/6233/9349/6164/6138/23521/6152/6143/6176/6206/6165/6208/6135/6194/6160/7316/9045/6230/6147/6125/6191/6161/6156/6207/6224/6188/6124/5717/11224/6205/9698	31
BP	GO:0006119	oxidative phosphorylation	14/146	148/18862	8.93194e-12	1.15222e-09	1.06654e-09	4508/4519/4513/4536/4509/4514/4538/4540/4541/4535/4539/4537/4512/4720	14
BP	GO:0042775	mitochondrial ATP synthesis coupled electron transport	12/146	99/18862	1.52058e-11	1.84617e-09	1.70889e-09	4519/4513/4536/4514/4538/4540/4541/4535/4539/4537/4512/4720	12
BP	GO:0042773	ATP synthesis coupled electron transport	12/146	100/18862	1.71659e-11	1.96835e-09	1.82199e-09	4519/4513/4536/4514/4538/4540/4541/4535/4539/4537/4512/4720	12
BP	GO:0022904	respiratory electron transport chain	12/146	117/18862	1.11975e-10	1.2164e-08	1.12595e-08	4519/4513/4536/4514/4538/4540/4541/4535/4539/4537/4512/4720	12
BP	GO:0022900	electron transport chain	13/146	178/18862	1.29258e-09	1.33395e-07	1.23476e-07	1528/4519/4513/4536/4514/4538/4540/4541/4535/4539/4537/4512/4720	13
BP	GO:0042273	ribosomal large subunit biogenesis	9/146	72/18862	4.3759e-09	4.30089e-07	3.98108e-07	23560/55651/6152/6165/6135/9045/6147/6125/11224	9
BP	GO:0002181	cytoplasmic translation	10/146	102/18862	6.56789e-09	6.16187e-07	5.70369e-07	6138/23521/6152/6143/6176/6165/6135/6160/6161/6156	10
BP	GO:0006120	mitochondrial electron transport, NADH to ubiquinone	8/146	55/18862	9.51434e-09	8.53809e-07	7.90322e-07	4536/4538/4540/4541/4535/4539/4537/4720	8
BP	GO:0045333	cellular respiration	12/146	187/18862	2.4522e-08	2.10889e-06	1.95208e-06	4519/4513/4536/4514/4538/4540/4541/4535/4539/4537/4512/4720	12
BP	GO:0042254	ribosome biogenesis	14/146	307/18862	1.19557e-07	9.87066e-06	9.1367e-06	11340/23560/55651/6152/6165/6208/6135/6194/9045/6230/6147/6125/11224/64745	14
BP	GO:0046034	ATP metabolic process	14/146	313/18862	1.51576e-07	1.195e-05	1.10615e-05	4508/4519/4513/4536/4509/4514/4538/4540/4541/4535/4539/4537/4512/4720	14
BP	GO:0022613	ribonucleoprotein complex biogenesis	17/146	473/18862	1.56323e-07	1.195e-05	1.10615e-05	11340/23560/55651/23521/6152/6165/6208/6135/6194/9045/6430/6230/6147/6125/3326/11224/64745	17
BP	GO:0015980	energy derivation by oxidation of organic compounds	13/146	278/18862	2.59154e-07	1.91034e-05	1.76829e-05	4519/4513/4536/4514/4538/4540/4541/4535/4539/4537/2778/4512/4720	13
BP	GO:1902600	proton transmembrane transport	10/146	157/18862	4.01993e-07	2.86108e-05	2.64834e-05	1528/4508/4519/4513/4509/4514/4538/4540/4512/57282	10
BP	GO:0010257	NADH dehydrogenase complex assembly	7/146	65/18862	6.89312e-07	4.58948e-05	4.24822e-05	4536/4538/4540/4541/4535/4537/4720	7
BP	GO:0032981	mitochondrial respiratory chain complex I assembly	7/146	65/18862	6.89312e-07	4.58948e-05	4.24822e-05	4536/4538/4540/4541/4535/4537/4720	7
BP	GO:0006364	rRNA processing	11/146	228/18862	1.6561e-06	0.000106818	9.88757e-05	11340/23560/55651/6165/6208/6135/6194/9045/6230/6125/11224	11
BP	GO:0016072	rRNA metabolic process	11/146	238/18862	2.51249e-06	0.000157145	0.00014546	11340/23560/55651/6165/6208/6135/6194/9045/6230/6125/11224	11
BP	GO:0033108	mitochondrial respiratory chain complex assembly	7/146	101/18862	1.35051e-05	0.000819839	0.000758878	4536/4538/4540/4541/4535/4537/4720	7
BP	GO:0031397	negative regulation of protein ubiquitination	6/146	79/18862	3.38841e-05	0.00199819	0.00184961	10625/23560/9349/6135/6125/6188	6
BP	GO:0000027	ribosomal large subunit assembly	4/146	28/18862	6.10388e-05	0.00349956	0.00323934	6152/6135/6147/6125	4
BP	GO:1903321	negative regulation of protein modification by small protein conjugation or removal	6/146	91/18862	7.53054e-05	0.00420082	0.00388846	10625/23560/9349/6135/6125/6188	6
BP	GO:1903320	regulation of protein modification by small protein conjugation or removal	9/146	237/18862	9.74527e-05	0.00529322	0.00489963	10625/23560/26354/1958/9349/6135/6125/3326/6188	9
BP	GO:0042255	ribosome assembly	5/146	64/18862	0.000136992	0.00725006	0.00671097	6152/6208/6135/6147/6125	5
BP	GO:1990542	mitochondrial transmembrane transport	6/146	109/18862	0.000204153	0.0105343	0.009751	4508/4509/221154/9804/54543/54977	6
BP	GO:0051444	negative regulation of ubiquitin-protein transferase activity	3/146	16/18862	0.000236289	0.0118952	0.0110107	9349/6135/6125	3
BP	GO:0034470	ncRNA processing	11/146	400/18862	0.000288077	0.0141569	0.0131042	11340/23560/55651/6165/6208/6135/6194/9045/6230/6125/11224	11
BP	GO:0022618	ribonucleoprotein complex assembly	8/146	224/18862	0.000361434	0.0173488	0.0160588	23521/6152/6208/6135/6430/6147/6125/3326	8
BP	GO:0071826	ribonucleoprotein complex subunit organization	8/146	231/18862	0.00044359	0.0207822	0.0192369	23521/6152/6208/6135/6430/6147/6125/3326	8
BP	GO:0034660	ncRNA metabolic process	12/146	492/18862	0.0004531	0.0207822	0.0192369	11340/23560/55651/55152/6165/6208/6135/6194/9045/6230/6125/11224	12
BP	GO:0006417	regulation of translation	11/146	425/18862	0.000480221	0.0215473	0.0199451	23521/6208/6125/6191/6156/6188/9147/10209/51335/5997/9698	11
BP	GO:0006123	mitochondrial electron transport, cytochrome c to oxygen	3/146	21/18862	0.000545491	0.022988	0.0212787	4513/4514/4512	3
BP	GO:0019646	aerobic electron transport chain	3/146	21/18862	0.000545491	0.022988	0.0212787	4513/4514/4512	3
BP	GO:0009060	aerobic respiration	5/146	86/18862	0.000546093	0.022988	0.0212787	4513/4514/4538/4535/4512	5
BP	GO:2000059	negative regulation of ubiquitin-dependent protein catabolic process	4/146	49/18862	0.00055688	0.022988	0.0212787	9349/6135/6125/3326	4
BP	GO:0006414	translational elongation	6/146	134/18862	0.000618013	0.0250113	0.0231516	128308/158078/6176/1915/6156/9147	6
BP	GO:1904666	regulation of ubiquitin protein ligase activity	3/146	23/18862	0.000718178	0.0285061	0.0263865	9349/6135/6125	3
BP	GO:0031396	regulation of protein ubiquitination	7/146	205/18862	0.00109755	0.0427424	0.0395642	10625/23560/9349/6135/6125/3326/6188	7
BP	GO:0048857	neural nucleus development	4/146	60/18862	0.00120012	0.0458713	0.0424605	805/93986/170302/60	4
BP	GO:0046686	response to cadmium ion	4/146	61/18862	0.0012767	0.047598	0.0440588	1528/4519/2353/4501	4
BP	GO:0000470	maturation of LSU-rRNA	3/146	28/18862	0.00129142	0.047598	0.0440588	23560/55651/11224	3
BP	GO:1903051	negative regulation of proteolysis involved in cellular protein catabolic process	4/146	65/18862	0.0016173	0.0579391	0.0536309	9349/6135/6125/3326	4
BP	GO:0034248	regulation of cellular amide metabolic process	11/146	494/18862	0.00162813	0.0579391	0.0536309	23521/6208/6125/6191/6156/6188/9147/10209/51335/5997/9698	11
BP	GO:0050854	regulation of antigen receptor-mediated signaling pathway	4/146	66/18862	0.00171142	0.0598705	0.0554187	865/6188/7430/23228	4
BP	GO:0030953	astral microtubule organization	2/146	10/18862	0.00257092	0.0855867	0.0792227	7430/1739	2
BP	GO:0032536	regulation of cell projection size	2/146	10/18862	0.00257092	0.0855867	0.0792227	5357/7430	2
BP	GO:2000434	regulation of protein neddylation	2/146	10/18862	0.00257092	0.0855867	0.0792227	6135/6125	2
BP	GO:0042274	ribosomal small subunit biogenesis	4/146	75/18862	0.00273561	0.0896239	0.0829597	6208/6194/6230/64745	4
BP	GO:0045471	response to ethanol	5/146	126/18862	0.00299348	0.094125	0.0871261	4519/4538/6138/6191/5997	5
BP	GO:0061418	regulation of transcription from RNA polymerase II promoter in response to hypoxia	4/146	77/18862	0.00300981	0.094125	0.0871261	1958/6233/7316/5717	4
BP	GO:1903363	negative regulation of cellular protein catabolic process	4/146	77/18862	0.00300981	0.094125	0.0871261	9349/6135/6125/3326	4
BP	GO:0070482	response to oxygen levels	9/146	385/18862	0.00311473	0.0953996	0.088306	4508/4519/4538/4540/1958/6233/378938/7316/5717	9
BP	GO:0030866	cortical actin cytoskeleton organization	3/146	38/18862	0.00314301	0.0953996	0.088306	5357/7430/1739	3
BP	GO:0042769	DNA damage response, detection of DNA damage	3/146	39/18862	0.0033858	0.10128	0.0937487	6233/7316/6188	3
BP	GO:1902895	positive regulation of pri-miRNA transcription by RNA polymerase II	3/146	40/18862	0.00363977	0.107321	0.0993411	26354/1958/2353	3
BP	GO:0017038	protein import	6/146	194/18862	0.00404499	0.11759	0.108846	1434/9349/3326/9804/10628/54543	6
BP	GO:0046688	response to copper ion	3/146	42/18862	0.00418187	0.11988	0.110966	4519/4512/4501	3
BP	GO:0015816	glycine transport	2/146	13/18862	0.00438892	0.120783	0.111802	5997/54977	2
BP	GO:0032530	regulation of microvillus organization	2/146	13/18862	0.00438892	0.120783	0.111802	5357/7430	2
BP	GO:1902947	regulation of tau-protein kinase activity	2/146	13/18862	0.00438892	0.120783	0.111802	1958/3326	2
BP	GO:0006913	nucleocytoplasmic transport	8/146	340/18862	0.0050402	0.13656	0.126405	1434/9349/4760/6430/3326/9147/10628/84248	8
BP	GO:0043374	CD8-positive, alpha-beta T cell differentiation	2/146	14/18862	0.00509452	0.13656	0.126405	9760/865	2
BP	GO:0051169	nuclear transport	8/146	343/18862	0.00530806	0.140459	0.130015	1434/9349/4760/6430/3326/9147/10628/84248	8
BP	GO:0030099	myeloid cell differentiation	9/146	419/18862	0.0053958	0.140974	0.130491	2778/2353/6208/6194/865/84148/85477/28962/54977	9
BP	GO:0006839	mitochondrial transport	7/146	274/18862	0.00553628	0.142836	0.132215	4508/4509/221154/64112/9804/54543/54977	7
BP	GO:0001666	response to hypoxia	8/146	348/18862	0.00577856	0.145439	0.134625	4519/4538/4540/1958/6233/378938/7316/5717	8
BP	GO:0000463	maturation of LSU-rRNA from tricistronic rRNA transcript (SSU-rRNA, 5.8S rRNA, LSU-rRNA)	2/146	15/18862	0.00584858	0.145439	0.134625	23560/11224	2
BP	GO:0072148	epithelial cell fate commitment	2/146	15/18862	0.00584858	0.145439	0.134625	4760/170302	2
BP	GO:0061028	establishment of endothelial barrier	3/146	48/18862	0.00609158	0.149679	0.138549	57826/7430/153562	3
BP	GO:0051238	sequestering of metal ion	2/146	16/18862	0.00665034	0.161486	0.149478	2495/2512	2
BP	GO:0042493	response to drug	8/146	359/18862	0.00692527	0.166206	0.153848	4519/4535/2778/2353/4760/3326/55754/10628	8
BP	GO:0036293	response to decreased oxygen levels	8/146	360/18862	0.00703747	0.166958	0.154543	4519/4538/4540/1958/6233/378938/7316/5717	8
BP	GO:0065002	intracellular protein transmembrane transport	3/146	51/18862	0.00721205	0.167255	0.154818	9847/9804/54543	3
BP	GO:1902893	regulation of pri-miRNA transcription by RNA polymerase II	3/146	51/18862	0.00721205	0.167255	0.154818	26354/1958/2353	3
BP	GO:1903076	regulation of protein localization to plasma membrane	4/146	100/18862	0.00760963	0.172623	0.159788	5357/7430/1739/60	4
BP	GO:0061614	pri-miRNA transcription by RNA polymerase II	3/146	52/18862	0.00761082	0.172623	0.159788	26354/1958/2353	3
BP	GO:0006979	response to oxidative stress	9/146	444/18862	0.00777359	0.174399	0.161431	4540/4541/4535/4537/2353/4512/6188/10628/4720	9
BP	GO:0051438	regulation of ubiquitin-protein transferase activity	3/146	53/18862	0.00802238	0.178045	0.164806	9349/6135/6125	3
BP	GO:1903829	positive regulation of cellular protein localization	7/146	295/18862	0.00817284	0.179455	0.166111	26354/5357/3326/7430/9847/1739/54543	7
BP	GO:0045116	protein neddylation	2/146	18/18862	0.00839384	0.18123	0.167754	6135/6125	2
BP	GO:0070498	interleukin-1-mediated signaling pathway	4/146	103/18862	0.00842929	0.18123	0.167754	1958/6233/7316/5717	4
BP	GO:0006754	ATP biosynthetic process	3/146	56/18862	0.00933473	0.198628	0.183858	4508/4513/4509	3
CC	GO:0022626	cytosolic ribosome	27/144	107/19520	2.01997e-34	6.20132e-32	4.78415e-32	6233/9349/6164/6138/23521/6152/6143/6176/6206/6165/6208/6135/6194/6160/9045/6230/6147/6125/6191/6161/6156/6207/6224/6188/6124/11224/6205	27
CC	GO:0044391	ribosomal subunit	28/144	187/19520	7.80678e-29	1.19834e-26	9.24487e-27	128308/6233/9349/6164/6138/23521/6152/6143/6176/6206/6165/6208/6135/6194/6160/9045/6230/6147/6125/6191/6161/6156/6207/6224/6188/6124/11224/6205	28
CC	GO:0005840	ribosome	28/144	243/19520	1.44012e-25	1.47372e-23	1.13694e-23	128308/6233/9349/6164/6138/23521/6152/6143/6176/6206/6165/6208/6135/6194/6160/9045/6230/6147/6125/6191/6161/6156/6207/6224/6188/6124/11224/6205	28
CC	GO:0022625	cytosolic large ribosomal subunit	17/144	57/19520	2.33366e-23	1.79108e-21	1.38177e-21	9349/6164/6138/23521/6152/6143/6176/6165/6135/6160/9045/6147/6125/6161/6156/6124/11224	17
CC	GO:0015934	large ribosomal subunit	18/144	115/19520	3.64387e-19	2.23734e-17	1.72604e-17	128308/9349/6164/6138/23521/6152/6143/6176/6165/6135/6160/9045/6147/6125/6161/6156/6124/11224	18
CC	GO:0022627	cytosolic small ribosomal subunit	10/144	46/19520	1.13078e-12	5.78584e-11	4.46362e-11	6233/6206/6208/6194/6230/6191/6207/6224/6188/6205	10
CC	GO:0070469	respirasome	12/144	103/19520	1.40675e-11	6.16958e-10	4.75966e-10	4519/4513/4536/4514/4538/4540/4541/4535/4539/4537/4512/4720	12
CC	GO:0098803	respiratory chain complex	11/144	87/19520	4.15128e-11	1.59305e-09	1.229e-09	4519/4513/4536/4514/4538/4540/4535/4539/4537/4512/4720	11
CC	GO:0015935	small ribosomal subunit	10/144	74/19520	1.6724e-10	5.70473e-09	4.40104e-09	6233/6206/6208/6194/6230/6191/6207/6224/6188/6205	10
CC	GO:0098800	inner mitochondrial membrane protein complex	12/144	142/19520	6.2681e-10	1.92431e-08	1.48455e-08	4508/4519/4536/4509/4538/4540/4535/4539/4537/4512/221154/4720	12
CC	GO:0098798	mitochondrial protein-containing complex	15/144	265/19520	1.18149e-09	3.29743e-08	2.54388e-08	128308/4508/4519/4536/4509/4538/4540/4535/4539/4537/4512/221154/9804/54543/4720	15
CC	GO:0005844	polysome	9/144	68/19520	1.71263e-09	4.38148e-08	3.38019e-08	6152/6143/6135/6194/6160/6191/6161/6156/6188	9
CC	GO:0005746	mitochondrial respirasome	9/144	89/19520	1.93776e-08	4.57609e-07	3.53033e-07	4519/4536/4538/4540/4535/4539/4537/4512/4720	9
CC	GO:0005743	mitochondrial inner membrane	18/144	493/19520	2.49408e-08	5.46915e-07	4.2193e-07	128308/4508/4519/4513/4536/4509/4514/4538/4540/4541/4535/4539/4537/4512/6188/221154/54977/4720	18
CC	GO:0005925	focal adhesion	16/144	416/19520	7.75393e-08	1.342e-06	1.03532e-06	9349/23521/6143/6176/6208/6160/6125/6191/1465/6156/6207/6188/7430/6124/6205/60	16
CC	GO:0005747	mitochondrial respiratory chain complex I	7/144	50/19520	7.86841e-08	1.342e-06	1.03532e-06	4536/4538/4540/4535/4539/4537/4720	7
CC	GO:0030964	NADH dehydrogenase complex	7/144	50/19520	7.86841e-08	1.342e-06	1.03532e-06	4536/4538/4540/4535/4539/4537/4720	7
CC	GO:0045271	respiratory chain complex I	7/144	50/19520	7.86841e-08	1.342e-06	1.03532e-06	4536/4538/4540/4535/4539/4537/4720	7
CC	GO:0030055	cell-substrate junction	16/144	423/19520	9.74062e-08	1.57388e-06	1.2142e-06	9349/23521/6143/6176/6208/6160/6125/6191/1465/6156/6207/6188/7430/6124/6205/60	16
CC	GO:0042788	polysomal ribosome	6/144	32/19520	1.12316e-07	1.72405e-06	1.33006e-06	6152/6143/6135/6160/6161/6156	6
CC	GO:1990204	oxidoreductase complex	9/144	111/19520	1.34299e-07	1.96333e-06	1.51465e-06	4519/4536/4538/4540/4535/4539/4537/4512/4720	9
CC	GO:0014069	postsynaptic density	10/144	313/19520	0.00011242	0.00156877	0.00121026	4536/9349/6208/9045/6230/6156/6207/6188/1739/120	10
CC	GO:0032279	asymmetric synapse	10/144	318/19520	0.000127977	0.00170822	0.00131785	4536/9349/6208/9045/6230/6156/6207/6188/1739/120	10
CC	GO:0070069	cytochrome complex	4/144	36/19520	0.000139264	0.00178141	0.00137431	4519/4513/4514/4512	4
CC	GO:0099572	postsynaptic specialization	10/144	333/19520	0.000186004	0.00228413	0.00176214	4536/9349/6208/9045/6230/6156/6207/6188/1739/120	10
CC	GO:0098984	neuron to neuron synapse	10/144	342/19520	0.000230441	0.00272098	0.00209916	4536/9349/6208/9045/6230/6156/6207/6188/1739/120	10
CC	GO:0045277	respiratory chain complex IV	3/144	22/19520	0.000546305	0.00621169	0.00479215	4513/4514/4512	3
CC	GO:1904813	ficolin-1-rich granule lumen	5/144	124/19520	0.00227217	0.024766	0.0191063	6727/1915/2495/3326/5717	5
CC	GO:0044754	autolysosome	2/144	10/19520	0.00233946	0.024766	0.0191063	2495/2512	2
CC	GO:0098562	cytoplasmic side of membrane	6/144	191/19520	0.00296442	0.0303359	0.0234033	2778/1915/7430/1739/5997/2790	6
CC	GO:0005741	mitochondrial outer membrane	6/144	195/19520	0.00328317	0.032514	0.0250837	1528/6233/7316/64112/9804/54543	6
CC	GO:0005750	mitochondrial respiratory chain complex III	2/144	14/19520	0.00464028	0.041899	0.0323239	4519/4512	2
CC	GO:0045263	proton-transporting ATP synthase complex, coupling factor F(o)	2/144	14/19520	0.00464028	0.041899	0.0323239	4508/4509	2
CC	GO:0045275	respiratory chain complex III	2/144	14/19520	0.00464028	0.041899	0.0323239	4519/4512	2
CC	GO:1902562	H4 histone acetyltransferase complex	3/144	47/19520	0.00502861	0.0441081	0.0340282	10902/84148/60	3
CC	GO:0032587	ruffle membrane	4/144	95/19520	0.00538284	0.0459037	0.0354134	1915/6188/7430/9847	4
CC	GO:0031968	organelle outer membrane	6/144	220/19520	0.00588594	0.0483702	0.0373163	1528/6233/7316/64112/9804/54543	6
CC	GO:0005767	secondary lysosome	2/144	16/19520	0.00606026	0.0483702	0.0373163	2495/2512	2
CC	GO:0019867	outer membrane	6/144	222/19520	0.00614474	0.0483702	0.0373163	1528/6233/7316/64112/9804/54543	6
CC	GO:0005903	brush border	4/144	101/19520	0.00667384	0.0512217	0.0395162	5357/3326/7430/120	4
CC	GO:1904949	ATPase complex	4/144	103/19520	0.00714592	0.0535072	0.0412794	124944/10902/55754/6601	4
CC	GO:0009898	cytoplasmic side of plasma membrane	5/144	167/19520	0.00800213	0.0584918	0.0451248	2778/7430/1739/5997/2790	5
CC	GO:0035267	NuA4 histone acetyltransferase complex	2/144	21/19520	0.0103531	0.0722362	0.0557282	10902/60	2
CC	GO:0043189	H4/H2A histone acetyltransferase complex	2/144	21/19520	0.0103531	0.0722362	0.0557282	10902/60	2
CC	GO:0005753	mitochondrial proton-transporting ATP synthase complex	2/144	22/19520	0.0113337	0.0773213	0.0596513	4508/4509	2
CC	GO:0101002	ficolin-1-rich granule	5/144	185/19520	0.0120976	0.0790118	0.0609554	6727/1915/2495/3326/5717	5
CC	GO:0045259	proton-transporting ATP synthase complex	2/144	23/19520	0.0123536	0.0790118	0.0609554	4508/4509	2
CC	GO:0098799	outer mitochondrial membrane protein complex	2/144	23/19520	0.0123536	0.0790118	0.0609554	9804/54543	2
CC	GO:0033177	proton-transporting two-sector ATPase complex, proton-transporting domain	2/144	24/19520	0.0134121	0.0827362	0.0638287	4508/4509	2
CC	GO:0070160	tight junction	4/144	124/19520	0.013475	0.0827362	0.0638287	57826/1739/153562/60	4
CC	GO:0016324	apical plasma membrane	7/144	351/19520	0.0154926	0.0932592	0.0719469	2778/3326/7430/55754/1739/153562/57282	7
CC	GO:0070603	SWI/SNF superfamily-type complex	3/144	74/19520	0.0174095	0.100583	0.0775971	124944/10902/6601	3
CC	GO:0030125	clathrin vesicle coat	2/144	28/19520	0.0180198	0.100583	0.0775971	54812/9685	2
CC	GO:0044665	MLL1/2 complex	2/144	28/19520	0.0180198	0.100583	0.0775971	124944/84148	2
CC	GO:0071339	MLL1 complex	2/144	28/19520	0.0180198	0.100583	0.0775971	124944/84148	2
CC	GO:0043296	apical junction complex	4/144	137/19520	0.018757	0.102829	0.0793295	57826/1739/153562/60	4
CC	GO:0016323	basolateral plasma membrane	5/144	211/19520	0.0202271	0.108942	0.0840459	3326/7430/1739/153562/57282	5
CC	GO:0005819	spindle	7/144	381/19520	0.0230941	0.12224	0.0943045	27436/7178/805/5885/6188/51335/84942	7
CC	GO:0000123	histone acetyltransferase complex	3/144	84/19520	0.0242708	0.124643	0.0961589	10902/84148/60	3
CC	GO:0005938	cell cortex	6/144	301/19520	0.0243603	0.124643	0.0961589	1915/5357/7430/9847/85477/120	6
CC	GO:0005834	heterotrimeric G-protein complex	2/144	34/19520	0.0259873	0.128679	0.0992723	2778/2790	2
CC	GO:1905360	GTPase complex	2/144	34/19520	0.0259873	0.128679	0.0992723	2778/2790	2
CC	GO:0098862	cluster of actin-based cell projections	4/144	156/19520	0.0285203	0.13898	0.107219	5357/3326/7430/120	4
CC	GO:0036464	cytoplasmic ribonucleoprotein granule	5/144	234/19520	0.0298668	0.143267	0.110527	6194/6191/9698/23741/60	5
CC	GO:0034774	secretory granule lumen	6/144	322/19520	0.0323809	0.145013	0.111874	29106/6727/1915/3326/2512/5717	6
CC	GO:0031248	protein acetyltransferase complex	3/144	94/19520	0.03239	0.145013	0.111874	10902/84148/60	3
CC	GO:1902493	acetyltransferase complex	3/144	94/19520	0.03239	0.145013	0.111874	10902/84148/60	3
CC	GO:0009925	basal plasma membrane	5/144	240/19520	0.0327859	0.145013	0.111874	3326/7430/1739/153562/57282	5
CC	GO:0044232	organelle membrane contact site	2/144	39/19520	0.0335172	0.145013	0.111874	9804/83930	2
CC	GO:0045177	apical part of cell	7/144	414/19520	0.0340762	0.145013	0.111874	2778/3326/7430/55754/1739/153562/57282	7
CC	GO:0060205	cytoplasmic vesicle lumen	6/144	326/19520	0.0340823	0.145013	0.111874	29106/6727/1915/3326/2512/5717	6
CC	GO:0000922	spindle pole	4/144	166/19520	0.0346737	0.145013	0.111874	7178/805/5885/84942	4
CC	GO:0035770	ribonucleoprotein granule	5/144	244/19520	0.0348277	0.145013	0.111874	6194/6191/9698/23741/60	5
CC	GO:0031983	vesicle lumen	6/144	328/19520	0.0349543	0.145013	0.111874	29106/6727/1915/3326/2512/5717	6
CC	GO:0001772	immunological synapse	2/144	41/19520	0.0367395	0.150387	0.116019	7430/1739	2
CC	GO:0043209	myelin sheath	2/144	42/19520	0.0383936	0.15509	0.119648	1739/153562	2
CC	GO:0031253	cell projection membrane	6/144	337/19520	0.0390566	0.155097	0.119653	1915/3326/6188/7430/9847/1739	6
CC	GO:0031256	leading edge membrane	4/144	173/19520	0.0394056	0.155097	0.119653	1915/6188/7430/9847	4
CC	GO:0001726	ruffle	4/144	175/19520	0.0408221	0.158638	0.122385	1915/6188/7430/9847	4
CC	GO:0030863	cortical cytoskeleton	3/144	104/19520	0.0417514	0.160221	0.123606	1915/5357/7430	3
CC	GO:0045178	basal part of cell	5/144	258/19520	0.0425863	0.161407	0.124521	3326/7430/1739/153562/57282	5
CC	GO:0030118	clathrin coat	2/144	45/19520	0.043522	0.162942	0.125705	54812/9685	2
CC	GO:0005884	actin filament	3/144	113/19520	0.0512111	0.189419	0.146132	5357/7430/60	3
CC	GO:0005681	spliceosomal complex	4/144	191/19520	0.0531858	0.194382	0.14996	10625/140890/27336/51759	4
MF	GO:0003735	structural constituent of ribosome	28/145	180/18337	1.71325e-28	5.31107e-26	4.49051e-26	128308/6233/9349/6164/6138/23521/6152/6143/6176/6206/6165/6208/6135/6194/6160/9045/6230/6147/6125/6191/6161/6156/6207/6224/6188/6124/11224/6205	28
MF	GO:0009055	electron transfer activity	13/145	138/18337	6.94936e-11	7.5975e-09	6.4237e-09	1528/4519/4513/4536/4514/4538/4540/4541/4535/4539/4537/4512/4720	13
MF	GO:0019843	rRNA binding	10/145	64/18337	7.35242e-11	7.5975e-09	6.4237e-09	9349/6208/6135/6147/6125/6191/6207/6188/51335/6205	10
MF	GO:0003954	NADH dehydrogenase activity	8/145	45/18337	2.11904e-09	1.09484e-07	9.25685e-08	4536/4538/4540/4541/4535/4539/4537/4720	8
MF	GO:0008137	NADH dehydrogenase (ubiquinone) activity	8/145	45/18337	2.11904e-09	1.09484e-07	9.25685e-08	4536/4538/4540/4541/4535/4539/4537/4720	8
MF	GO:0050136	NADH dehydrogenase (quinone) activity	8/145	45/18337	2.11904e-09	1.09484e-07	9.25685e-08	4536/4538/4540/4541/4535/4539/4537/4720	8
MF	GO:0003955	NAD(P)H dehydrogenase (quinone) activity	8/145	48/18337	3.63625e-09	1.61034e-07	1.36154e-07	4536/4538/4540/4541/4535/4539/4537/4720	8
MF	GO:0016655	oxidoreductase activity, acting on NAD(P)H, quinone or similar compound as acceptor	8/145	60/18337	2.27633e-08	8.82077e-07	7.45797e-07	4536/4538/4540/4541/4535/4539/4537/4720	8
MF	GO:0016651	oxidoreductase activity, acting on NAD(P)H	8/145	102/18337	1.47573e-06	5.08306e-05	4.29773e-05	4536/4538/4540/4541/4535/4539/4537/4720	8
MF	GO:0048027	mRNA 5'-UTR binding	4/145	26/18337	4.89767e-05	0.00146714	0.00124047	26354/6208/6125/6207	4
MF	GO:0004129	cytochrome-c oxidase activity	4/145	28/18337	6.6258e-05	0.00146714	0.00124047	1528/4513/4514/4512	4
MF	GO:0015002	heme-copper terminal oxidase activity	4/145	28/18337	6.6258e-05	0.00146714	0.00124047	1528/4513/4514/4512	4
MF	GO:0016675	oxidoreductase activity, acting on a heme group of donors	4/145	28/18337	6.6258e-05	0.00146714	0.00124047	1528/4513/4514/4512	4
MF	GO:0016676	oxidoreductase activity, acting on a heme group of donors, oxygen as acceptor	4/145	28/18337	6.6258e-05	0.00146714	0.00124047	1528/4513/4514/4512	4
MF	GO:0055106	ubiquitin-protein transferase regulator activity	3/145	18/18337	0.00036223	0.00748608	0.00632949	9349/6135/6125	3
MF	GO:0015078	proton transmembrane transporter activity	6/145	124/18337	0.000457805	0.00886997	0.00749957	1528/4508/4513/4509/4514/4512	6
MF	GO:0031625	ubiquitin protein ligase binding	9/145	293/18337	0.000547091	0.00997636	0.00843502	6233/9349/6135/7316/6125/3326/64112/10628/4720	9
MF	GO:0044389	ubiquitin-like protein ligase binding	9/145	312/18337	0.000855427	0.0147324	0.0124562	6233/9349/6135/7316/6125/3326/64112/10628/4720	9
MF	GO:0003924	GTPase activity	9/145	322/18337	0.00106727	0.0174133	0.014723	57826/23560/2778/158078/1915/6903/5997/2790/377	9
MF	GO:0045296	cadherin binding	9/145	332/18337	0.0013198	0.020457	0.0172964	6164/6138/6152/9045/6147/3326/7430/9685/1739	9
MF	GO:0097718	disordered domain specific binding	3/145	34/18337	0.00242173	0.0357493	0.0302261	805/3326/7430	3
MF	GO:0008199	ferric iron binding	2/145	10/18337	0.00268063	0.0361302	0.0305482	2495/2512	2
MF	GO:0099186	structural constituent of postsynapse	2/145	10/18337	0.00268063	0.0361302	0.0305482	1739/60	2
MF	GO:0008097	5S rRNA binding	2/145	11/18337	0.00325938	0.0421003	0.0355958	6135/6125	2
MF	GO:0031492	nucleosomal DNA binding	3/145	40/18337	0.0038627	0.0478975	0.0404974	9324/6601/60	3
MF	GO:0031386	protein tag	2/145	13/18337	0.00457472	0.0545448	0.0461177	6233/7316	2
MF	GO:0046933	proton-transporting ATP synthase activity, rotational mechanism	2/145	17/18337	0.00781309	0.0865021	0.0731376	4508/4509	2
MF	GO:0098918	structural constituent of synapse	2/145	17/18337	0.00781309	0.0865021	0.0731376	1739/60	2
MF	GO:0048038	quinone binding	2/145	18/18337	0.00874445	0.0934752	0.0790333	4538/4720	2
MF	GO:0031490	chromatin DNA binding	4/145	103/18337	0.00906392	0.0936605	0.07919	9760/9324/6601/60	4
MF	GO:0003746	translation elongation factor activity	2/145	19/18337	0.0097229	0.097229	0.0822072	158078/1915	2
MF	GO:0005525	GTP binding	8/145	376/18337	0.0101709	0.0985307	0.0833078	57826/23560/26354/2778/158078/1915/3326/377	8
MF	GO:0032550	purine ribonucleoside binding	8/145	381/18337	0.0109528	0.10135	0.0856918	57826/23560/26354/2778/158078/1915/3326/377	8
MF	GO:0001883	purine nucleoside binding	8/145	384/18337	0.0114428	0.10135	0.0856918	57826/23560/26354/2778/158078/1915/3326/377	8
MF	GO:0032549	ribonucleoside binding	8/145	384/18337	0.0114428	0.10135	0.0856918	57826/23560/26354/2778/158078/1915/3326/377	8
MF	GO:0008320	protein transmembrane transporter activity	2/145	21/18337	0.0118179	0.101765	0.0860426	9804/54543	2
MF	GO:0001882	nucleoside binding	8/145	390/18337	0.0124712	0.10178	0.0860552	57826/23560/26354/2778/158078/1915/3326/377	8
MF	GO:0015399	primary active transmembrane transporter activity	3/145	61/18337	0.0124763	0.10178	0.0860552	4514/9804/23461	3
MF	GO:0019001	guanyl nucleotide binding	8/145	398/18337	0.0139464	0.104745	0.0885619	57826/23560/26354/2778/158078/1915/3326/377	8
MF	GO:0032561	guanyl ribonucleotide binding	8/145	398/18337	0.0139464	0.104745	0.0885619	57826/23560/26354/2778/158078/1915/3326/377	8
MF	GO:0035255	ionotropic glutamate receptor binding	2/145	23/18337	0.0140919	0.104745	0.0885619	4536/2778	2
MF	GO:0003712	transcription coregulator activity	9/145	480/18337	0.0141913	0.104745	0.0885619	57826/10902/865/5204/51567/84148/6601/2130/23741	9
MF	GO:0015252	proton channel activity	2/145	24/18337	0.015294	0.110259	0.0932244	4508/4509	2
MF	GO:0000049	tRNA binding	3/145	67/18337	0.0160486	0.11307	0.0956007	6165/1915/9147	3
MF	GO:0022884	macromolecule transmembrane transporter activity	2/145	25/18337	0.0165387	0.113933	0.0963307	9804/54543	2
MF	GO:0008198	ferrous iron binding	2/145	26/18337	0.0178251	0.118909	0.100538	2495/2512	2
MF	GO:0031491	nucleosome binding	3/145	70/18337	0.0180282	0.118909	0.100538	9324/6601/60	3
MF	GO:0035035	histone acetyltransferase binding	2/145	27/18337	0.0191525	0.123693	0.104583	1958/23741	2
MF	GO:0061629	RNA polymerase II-specific DNA-binding transcription factor binding	6/145	271/18337	0.0208726	0.132051	0.11165	2353/93986/4760/10902/9324/60	6
MF	GO:0046966	thyroid hormone receptor binding	2/145	29/18337	0.0219275	0.133285	0.112692	10902/9324	2
MF	GO:0140318	protein transporter activity	2/145	29/18337	0.0219275	0.133285	0.112692	9804/54543	2
MF	GO:0033613	activating transcription factor binding	3/145	78/18337	0.023943	0.140567	0.118849	2353/5757/4760	3
MF	GO:0045182	translation regulator activity	4/145	138/18337	0.0240324	0.140567	0.118849	158078/6208/1915/10209	4
MF	GO:0008135	translation factor activity, RNA binding	3/145	84/18337	0.0289871	0.166407	0.140698	158078/1915/10209	3
MF	GO:0140297	DNA-binding transcription factor binding	7/145	376/18337	0.0300763	0.169521	0.14333	2353/5757/93986/4760/10902/9324/60	7
MF	GO:1904680	peptide transmembrane transporter activity	2/145	35/18337	0.0311635	0.172512	0.145859	9804/54543	2
MF	GO:0048487	beta-tubulin binding	2/145	38/18337	0.0362608	0.197208	0.166739	27436/5997	2

## Sheet: Table S4 go_MTur_Alpha_cells
ONTOLOGY	ID	Description	GeneRatio	BgRatio	pvalue	p.adjust	qvalue	geneID	Count
BP	GO:0019885	antigen processing and presentation of endogenous peptide antigen via MHC class I	5/151	17/18862	1.76184e-07	0.000394473	0.000334905	567/3133/3106/3105/6892	5
BP	GO:0002483	antigen processing and presentation of endogenous peptide antigen	5/151	19/18862	3.26821e-07	0.000394473	0.000334905	567/3133/3106/3105/6892	5
BP	GO:0019883	antigen processing and presentation of endogenous antigen	5/151	26/18862	1.76713e-06	0.00139229	0.00118205	567/3133/3106/3105/6892	5
BP	GO:0002479	antigen processing and presentation of exogenous peptide antigen via MHC class I, TAP-dependent	7/151	75/18862	2.30703e-06	0.00139229	0.00118205	567/3133/3106/811/3105/5691/6892	7
BP	GO:0042590	antigen processing and presentation of exogenous peptide antigen via MHC class I	7/151	80/18862	3.57121e-06	0.00172418	0.00146382	567/3133/3106/811/3105/5691/6892	7
BP	GO:0030073	insulin secretion	10/151	207/18862	6.6647e-06	0.00268143	0.00227652	2641/1803/169026/1392/7425/292/25874/54097/8431/1113	10
BP	GO:0009914	hormone transport	12/151	312/18862	8.19312e-06	0.00282546	0.0023988	2641/7276/1803/23428/169026/1392/7425/292/25874/54097/8431/1113	12
BP	GO:0002474	antigen processing and presentation of peptide antigen via MHC class I	7/151	99/18862	1.47441e-05	0.00444903	0.0037772	567/3133/3106/811/3105/5691/6892	7
BP	GO:0051604	protein maturation	11/151	293/18862	2.46792e-05	0.00661951	0.00561993	51126/10159/5126/4325/5646/2152/10549/811/28972/1363/9528	11
BP	GO:0030072	peptide hormone secretion	10/151	247/18862	3.0809e-05	0.00743728	0.00631421	2641/1803/169026/1392/7425/292/25874/54097/8431/1113	10
BP	GO:0009306	protein secretion	12/151	367/18862	4.07845e-05	0.00842331	0.00715135	2641/1803/169026/1392/7425/292/1595/25874/54097/8431/1113/7857	12
BP	GO:0035592	establishment of protein localization to extracellular region	12/151	368/18862	4.18723e-05	0.00842331	0.00715135	2641/1803/169026/1392/7425/292/1595/25874/54097/8431/1113/7857	12
BP	GO:0071692	protein localization to extracellular region	12/151	375/18862	5.02169e-05	0.0093249	0.00791679	2641/1803/169026/1392/7425/292/1595/25874/54097/8431/1113/7857	12
BP	GO:0001916	positive regulation of T cell mediated cytotoxicity	4/151	29/18862	8.02133e-05	0.0135036	0.0114645	567/3133/3106/3105	4
BP	GO:0002478	antigen processing and presentation of exogenous peptide antigen	8/151	177/18862	9.11501e-05	0.0135036	0.0114645	567/3133/829/3106/811/3105/5691/6892	8
BP	GO:0050796	regulation of insulin secretion	8/151	178/18862	9.48011e-05	0.0135036	0.0114645	2641/1803/169026/1392/292/25874/8431/1113	8
BP	GO:0002790	peptide secretion	12/151	401/18862	9.50955e-05	0.0135036	0.0114645	2641/1803/169026/1392/7425/292/1595/25874/54097/8431/1113/7857	12
BP	GO:0019884	antigen processing and presentation of exogenous antigen	8/151	185/18862	0.000123905	0.0166171	0.0141078	567/3133/829/3106/811/3105/5691/6892	8
BP	GO:2001198	regulation of dendritic cell differentiation	3/151	13/18862	0.000135622	0.0172311	0.0146291	28959/3106/55365	3
BP	GO:0046879	hormone secretion	10/151	302/18862	0.000163814	0.0197501	0.0167677	2641/1803/169026/1392/7425/292/25874/54097/8431/1113	10
BP	GO:0048002	antigen processing and presentation of peptide antigen	8/151	194/18862	0.000171811	0.0197501	0.0167677	567/3133/829/3106/811/3105/5691/6892	8
BP	GO:0034341	response to interferon-gamma	8/151	197/18862	0.000190815	0.0209376	0.0177759	169026/4360/567/7431/3133/3106/3105/960	8
BP	GO:0001914	regulation of T cell mediated cytotoxicity	4/151	38/18862	0.000235731	0.0247415	0.0210054	567/3133/3106/3105	4
BP	GO:0032024	positive regulation of insulin secretion	5/151	71/18862	0.000261867	0.0263394	0.022362	2641/169026/1392/25874/8431	5
BP	GO:0090276	regulation of peptide hormone secretion	8/151	209/18862	0.00028495	0.0275148	0.0233599	2641/1803/169026/1392/292/25874/8431/1113	8
BP	GO:0055119	relaxation of cardiac muscle	3/151	17/18862	0.000314964	0.0292431	0.0248273	1113/3759/481	3
BP	GO:0089718	amino acid import across plasma membrane	4/151	42/18862	0.000348689	0.0311754	0.0264677	23428/5999/6520/3688	4
BP	GO:0045953	negative regulation of natural killer cell mediated cytotoxicity	3/151	18/18862	0.000375743	0.0323944	0.0275027	3133/3106/3105	3
BP	GO:1904062	regulation of cation transmembrane transport	10/151	340/18862	0.000421269	0.0331271	0.0281247	53827/1392/5349/783/5999/3759/481/5174/3688/11261	10
BP	GO:0050708	regulation of protein secretion	9/151	279/18862	0.000422074	0.0331271	0.0281247	2641/1803/169026/1392/292/1595/25874/8431/1113	9
BP	GO:0001667	ameboidal-type cell migration	12/151	473/18862	0.000432973	0.0331271	0.0281247	2191/1803/54453/5646/9124/8879/811/11171/5217/5168/3688/7857	12
BP	GO:0002716	negative regulation of natural killer cell mediated immunity	3/151	19/18862	0.000443582	0.0331271	0.0281247	3133/3106/3105	3
BP	GO:0016485	protein processing	8/151	224/18862	0.000452856	0.0331271	0.0281247	10159/5126/4325/5646/2152/28972/1363/9528	8
BP	GO:0043312	neutrophil degranulation	12/151	485/18862	0.000540771	0.0371016	0.031499	7276/567/84418/5912/302/23406/10159/5646/10549/3106/8895/960	12
BP	GO:0071346	cellular response to interferon-gamma	7/151	177/18862	0.000564905	0.0371016	0.031499	4360/567/7431/3133/3106/3105/960	7
BP	GO:0002283	neutrophil activation involved in immune response	12/151	488/18862	0.000571	0.0371016	0.031499	7276/567/84418/5912/302/23406/10159/5646/10549/3106/8895/960	12
BP	GO:0001913	T cell mediated cytotoxicity	4/151	48/18862	0.000584035	0.0371016	0.031499	567/3133/3106/3105	4
BP	GO:0043090	amino acid import	4/151	48/18862	0.000584035	0.0371016	0.031499	23428/5999/6520/3688	4
BP	GO:0019882	antigen processing and presentation	8/151	234/18862	0.000603982	0.0373849	0.0317396	567/3133/829/3106/811/3105/5691/6892	8
BP	GO:0001911	negative regulation of leukocyte mediated cytotoxicity	3/151	22/18862	0.000692671	0.0406096	0.0344774	3133/3106/3105	3
BP	GO:0002446	neutrophil mediated immunity	12/151	499/18862	0.000694307	0.0406096	0.0344774	7276/567/84418/5912/302/23406/10159/5646/10549/3106/8895/960	12
BP	GO:0042119	neutrophil activation	12/151	500/18862	0.000706547	0.0406096	0.0344774	7276/567/84418/5912/302/23406/10159/5646/10549/3106/8895/960	12
BP	GO:0097581	lamellipodium organization	5/151	89/18862	0.000743994	0.0417675	0.0354604	51196/3983/5168/3688/960	5
BP	GO:0002711	positive regulation of T cell mediated immunity	4/151	52/18862	0.000792709	0.0434909	0.0369236	567/3133/3106/3105	4
BP	GO:0060333	interferon-gamma-mediated signaling pathway	5/151	91/18862	0.000822974	0.044148	0.0374814	567/3133/3106/3105/960	5
BP	GO:0002791	regulation of peptide secretion	9/151	308/18862	0.000855972	0.0449199	0.0381368	2641/1803/169026/1392/292/1595/25874/8431/1113	9
BP	GO:2000649	regulation of sodium ion transmembrane transporter activity	4/151	54/18862	0.000914627	0.0469768	0.0398831	53827/5349/481/11261	4
BP	GO:0001912	positive regulation of leukocyte mediated cytotoxicity	4/151	55/18862	0.000980282	0.0482556	0.0409687	567/3133/3106/3105	4
BP	GO:0060337	type I interferon signaling pathway	5/151	95/18862	0.000999494	0.0482556	0.0409687	3133/11274/2537/3106/3105	5
BP	GO:0090277	positive regulation of peptide hormone secretion	5/151	95/18862	0.000999494	0.0482556	0.0409687	2641/169026/1392/25874/8431	5
BP	GO:0003333	amino acid transmembrane transport	5/151	96/18862	0.0010477	0.0486375	0.041293	55089/23428/5999/6520/3688	5
BP	GO:0071357	cellular response to type I interferon	5/151	96/18862	0.0010477	0.0486375	0.041293	3133/11274/2537/3106/3105	5
CC	GO:0030176	integral component of endoplasmic reticulum membrane	14/156	157/19520	3.14122e-11	8.11046e-09	6.20896e-09	567/3133/6319/26580/54344/3106/8879/811/28972/55161/51604/9524/3105/6892	14
CC	GO:0031227	intrinsic component of endoplasmic reticulum membrane	14/156	165/19520	6.14428e-11	8.11046e-09	6.20896e-09	567/3133/6319/26580/54344/3106/8879/811/28972/55161/51604/9524/3105/6892	14
CC	GO:0031301	integral component of organelle membrane	17/156	371/19520	7.56614e-09	6.65821e-07	5.09719e-07	567/3133/2110/25874/6319/26580/54344/3106/8879/811/28972/55161/51604/9524/3105/100131801/6892	17
CC	GO:0031300	intrinsic component of organelle membrane	17/156	402/19520	2.46745e-08	1.62852e-06	1.24671e-06	567/3133/2110/25874/6319/26580/54344/3106/8879/811/28972/55161/51604/9524/3105/100131801/6892	17
CC	GO:0005925	focal adhesion	16/156	416/19520	2.36857e-07	1.2506e-05	9.574e-06	2191/1803/83692/567/4267/23022/7431/9124/4179/8895/811/22919/64098/3688/11261/960	16
CC	GO:0030055	cell-substrate junction	16/156	423/19520	2.96337e-07	1.30388e-05	9.98187e-06	2191/1803/83692/567/4267/23022/7431/9124/4179/8895/811/22919/64098/3688/11261/960	16
CC	GO:0071556	integral component of lumenal side of endoplasmic reticulum membrane	5/156	29/19520	3.10938e-06	0.000102609	7.85527e-05	3133/3106/811/3105/6892	5
CC	GO:0098553	lumenal side of endoplasmic reticulum membrane	5/156	29/19520	3.10938e-06	0.000102609	7.85527e-05	3133/3106/811/3105/6892	5
CC	GO:0005788	endoplasmic reticulum lumen	12/156	306/19520	6.68266e-06	0.000196025	0.000150067	2641/6383/25870/567/7425/2159/1622/64374/1191/811/7857/1114	12
CC	GO:0098576	lumenal side of membrane	5/156	36/19520	9.4355e-06	0.000249097	0.000190696	3133/3106/811/3105/6892	5
CC	GO:0030670	phagocytic vesicle membrane	6/156	77/19520	3.51344e-05	0.000843225	0.000645531	567/3133/3106/811/3105/6892	6
CC	GO:0042611	MHC protein complex	4/156	25/19520	4.35608e-05	0.000958338	0.000733656	567/3133/3106/3105	4
CC	GO:0140534	endoplasmic reticulum protein-containing complex	7/156	127/19520	7.29193e-05	0.00148082	0.00113364	567/6748/811/28972/51604/3105/6892	7
CC	GO:0030133	transport vesicle	12/156	402/19520	9.65979e-05	0.00182156	0.0013945	169026/10226/567/7425/3133/23546/5126/1113/3106/3105/11261/1363	12
CC	GO:0045335	phagocytic vesicle	7/156	136/19520	0.000112184	0.00197444	0.00151153	567/7431/3133/3106/811/3105/6892	7
CC	GO:0030666	endocytic vesicle membrane	7/156	163/19520	0.000342071	0.00564417	0.00432089	567/3133/3106/811/3105/6892/7314	7
CC	GO:0045177	apical part of cell	11/156	414/19520	0.000509155	0.0078566	0.00601462	2191/60676/3485/1803/23428/10159/6520/481/5174/56667/960	11
CC	GO:0016324	apical plasma membrane	10/156	351/19520	0.000535677	0.0078566	0.00601462	60676/3485/1803/23428/10159/6520/481/5174/56667/960	10
CC	GO:0055038	recycling endosome membrane	5/156	87/19520	0.000666765	0.00910327	0.00696901	567/5912/3133/3106/3105	5
CC	GO:0031258	lamellipodium membrane	3/156	22/19520	0.000689641	0.00910327	0.00696901	2191/1803/960	3
CC	GO:0030667	secretory granule membrane	9/156	305/19520	0.000792735	0.00986584	0.0075528	169026/9749/84418/5912/10159/3106/4179/8895/960	9
CC	GO:0030139	endocytic vesicle	9/156	307/19520	0.000830175	0.00986584	0.0075528	1803/567/7431/3133/3106/811/3105/6892/7314	9
CC	GO:1905368	peptidase complex	5/156	92/19520	0.000859524	0.00986584	0.0075528	2191/2152/28972/51604/5691	5
CC	GO:0030134	COPII-coated ER to Golgi transport vesicle	5/156	94/19520	0.000947226	0.0104195	0.00797664	567/3133/222068/3106/3105	5
CC	GO:0030027	lamellipodium	7/156	196/19520	0.00102191	0.0107914	0.00826135	2191/51196/1803/3983/23022/3688/960	7
CC	GO:0030658	transport vesicle membrane	7/156	206/19520	0.00136244	0.013834	0.0105907	169026/567/3133/23546/3106/3105/1363	7
CC	GO:0012507	ER to Golgi transport vesicle membrane	4/156	62/19520	0.00152748	0.0149354	0.0114338	567/3133/3106/3105	4
CC	GO:0031253	cell projection membrane	9/156	337/19520	0.0015871	0.0149641	0.0114557	2191/10400/1803/23428/10159/5174/22919/3688/960	9
CC	GO:0005790	smooth endoplasmic reticulum	3/156	30/19520	0.00173503	0.0155145	0.0118772	10549/3759/811	3
CC	GO:0031252	cell leading edge	10/156	411/19520	0.00176301	0.0155145	0.0118772	2191/51196/1803/3983/23022/7431/10159/10324/3688/960	10
CC	GO:0005743	mitochondrial inner membrane	11/156	493/19520	0.00207741	0.0176915	0.0135437	25994/292/2110/25874/2537/1346/1191/4729/25915/100131801/1349	11
CC	GO:0005797	Golgi medial cisterna	2/156	11/19520	0.00332904	0.0274646	0.0210255	3105/9528	2
CC	GO:0042583	chromaffin granule	2/156	12/19520	0.00397395	0.0313723	0.0240171	1113/1191	2
CC	GO:0055037	recycling endosome	6/156	190/19520	0.00427974	0.0313723	0.0240171	567/5912/3133/3106/3105/3688	6
CC	GO:0034774	secretory granule lumen	8/156	322/19520	0.00443321	0.0313723	0.0240171	2641/7276/567/302/23406/10549/1191/5274	8
CC	GO:0042383	sarcolemma	5/156	134/19520	0.00446751	0.0313723	0.0240171	10400/783/3759/481/3688	5
CC	GO:0045121	membrane raft	8/156	323/19520	0.00451571	0.0313723	0.0240171	1803/5912/302/292/10376/481/5174/3688	8
CC	GO:0098857	membrane microdomain	8/156	323/19520	0.00451571	0.0313723	0.0240171	1803/5912/302/292/10376/481/5174/3688	8
CC	GO:0098992	neuronal dense core vesicle	2/156	13/19520	0.00467194	0.0314842	0.0241027	1113/7857	2
CC	GO:0060205	cytoplasmic vesicle lumen	8/156	326/19520	0.00477034	0.0314842	0.0241027	2641/7276/567/302/23406/10549/1191/5274	8
CC	GO:0031983	vesicle lumen	8/156	328/19520	0.00494612	0.0318482	0.0243814	2641/7276/567/302/23406/10549/1191/5274	8
CC	GO:0030315	T-tubule	3/156	51/19520	0.00787614	0.0495071	0.0379002	783/3759/481	3
MF	GO:0042605	peptide antigen binding	5/151	32/18337	5.96353e-06	0.00228403	0.00196483	23428/3133/3106/3105/6892	5
MF	GO:0098631	cell adhesion mediator activity	5/151	58/18337	0.00011424	0.021877	0.0188196	152330/302/23022/9124/3688	5
MF	GO:0003779	actin binding	12/151	439/18337	0.000284736	0.0363513	0.031271	53827/3983/9749/2638/23022/23406/783/829/9124/5217/64098/3688	12
MF	GO:0045296	cadherin binding	10/151	332/18337	0.000435179	0.0416684	0.035845	53827/10226/3939/302/829/6520/9124/4179/22919/3688	10
