# Supplementary material for: scGENA: A Single-Cell Gene Coexpression Network Analysis Framework for Clustering Cell Types and Revealing Biological Mechanisms
Source: Bioengineering (Basel). 2022 Jul 30;9(8):353. doi: 10.3390/bioengineering9080353 (PMC9405199; doi:10.3390/bioengineering9080353)
Supplement: Supplementary file 1 [file bioengineering-09-00353-s001.zip › Table S5-S8 Beta Cells GO.xlsx]

## Sheet: Table S5
ONTOLOGY	ID	Description	GeneRatio	BgRatio	pvalue	p.adjust	qvalue	geneID	Count
BP	GO:0009266	response to temperature stimulus	1937-07-01	233/18866	3.01e-07	0.000318235	0.000256779	3310/1410/3304/3320/3066/133/27344	7
BP	GO:0034605	cellular response to heat	1937-05-01	125/18866	4.33e-06	0.00229244	0.00184974	3310/1410/3304/3320/3066	5
BP	GO:0042026	protein refolding	1937-03-01	23/18866	1.2e-05	0.00422124	0.00340606	3310/3304/3320	3
BP	GO:0009408	response to heat	1937-05-01	166/18866	1.72e-05	0.00455846	0.00367815	3310/1410/3304/3320/3066	5
BP	GO:0031647	regulation of protein stability	1937-06-01	296/18866	2.19e-05	0.00461876	0.00372681	1410/3304/51100/3320/6125/811	6
BP	GO:0006986	response to unfolded protein	1937-05-01	183/18866	2.76e-05	0.00461876	0.00372681	3310/3304/3320/58477/811	5
BP	GO:0050821	protein stabilization	1937-05-01	187/18866	3.06e-05	0.00461876	0.00372681	1410/3304/3320/6125/811	5
BP	GO:0035966	response to topologically incorrect protein	1937-05-01	205/18866	4.74e-05	0.00626756	0.0050572	3310/3304/3320/58477/811	5
BP	GO:0006457	protein folding	1937-05-01	230/18866	8.18e-05	0.00961124	0.00775516	3310/1410/3304/3320/811	5
BP	GO:0009409	response to cold	1937-03-01	48/18866	0.000113016	0.011957	0.00964796	3320/133/27344	3
BP	GO:0034620	cellular response to unfolded protein	1937-04-01	146/18866	0.000186379	0.0179263	0.0144644	3310/3304/58477/811	4
BP	GO:0072711	cellular response to hydroxyurea	1937-02-01	12/18866	0.000243971	0.0215102	0.0173562	5888/8914	2
BP	GO:0072710	response to hydroxyurea	1937-02-01	13/18866	0.000287974	0.023005	0.0185624	5888/8914	2
BP	GO:0035967	cellular response to topologically incorrect protein	1937-04-01	166/18866	0.000304414	0.023005	0.0185624	3310/3304/58477/811	4
BP	GO:1900034	regulation of cellular response to heat	1937-03-01	79/18866	0.000495559	0.0349534	0.0282034	1410/3304/3320	3
BP	GO:0010460	positive regulation of heart rate	1937-02-01	28/18866	0.00136995	0.0905878	0.0730939	3784/133	2
BP	GO:0071480	cellular response to gamma radiation	1937-02-01	30/18866	0.00157264	0.0978738	0.0789729	5888/1410	2
BP	GO:0051085	chaperone cofactor-dependent protein refolding	1937-02-01	32/18866	0.00178875	0.104222	0.0840952	3310/3304	2
BP	GO:0003014	renal system process	1937-03-01	125/18866	0.00187166	0.104222	0.0840952	10699/3784/133	3
BP	GO:0016486	peptide hormone processing	1937-02-01	35/18866	0.00213786	0.105276	0.0849458	10699/27344	2
BP	GO:0140448	signaling receptor ligand precursor processing	1937-02-01	35/18866	0.00213786	0.105276	0.0849458	10699/27344	2
BP	GO:0071824	protein-DNA complex subunit organization	1937-04-01	282/18866	0.00218911	0.105276	0.0849458	5888/8208/2186/5757	4
BP	GO:0051084	'de novo' posttranslational protein folding	1937-02-01	37/18866	0.00238707	0.109805	0.0886003	3310/3304	2
BP	GO:0006458	'de novo' protein folding	1937-02-01	41/18866	0.00292458	0.128925	0.104028	3310/3304	2
BP	GO:0045823	positive regulation of heart contraction	1937-02-01	43/18866	0.00321268	0.130732	0.105485	3784/133	2
BP	GO:0046717	acid secretion	1937-02-01	43/18866	0.00321268	0.130732	0.105485	5244/3784	2
BP	GO:0045005	DNA-dependent DNA replication maintenance of fidelity	1937-02-01	44/18866	0.00336153	0.131722	0.106285	5888/8914	2
BP	GO:0010569	regulation of double-strand break repair via homologous recombination	1937-02-01	47/18866	0.00382707	0.144609	0.116683	5888/8914	2
BP	GO:0002478	antigen processing and presentation of exogenous peptide antigen	1937-03-01	177/18866	0.00499109	0.182089	0.146924	50856/3108/811	3
BP	GO:0010332	response to gamma radiation	1937-02-01	56/18866	0.00539202	0.186548	0.150523	5888/1410	2
BP	GO:0034728	nucleosome organization	1937-03-01	183/18866	0.00547494	0.186548	0.150523	8208/2186/5757	3
BP	GO:0019884	antigen processing and presentation of exogenous antigen	1937-03-01	185/18866	0.00564228	0.186548	0.150523	50856/3108/811	3
BP	GO:0061077	chaperone-mediated protein folding	1937-02-01	60/18866	0.00616692	0.194777	0.157163	3310/3304	2
BP	GO:0048002	antigen processing and presentation of peptide antigen	1937-03-01	194/18866	0.00643336	0.194777	0.157163	50856/3108/811	3
BP	GO:0007565	female pregnancy	1937-03-01	196/18866	0.00661769	0.194777	0.157163	10699/133/811	3
BP	GO:0043112	receptor metabolic process	1937-03-01	198/18866	0.00680517	0.194777	0.157163	51100/3066/133	3
BP	GO:0031331	positive regulation of cellular catabolic process	1937-04-01	390/18866	0.00693146	0.194777	0.157163	3304/51100/3320/26986	4
BP	GO:0051054	positive regulation of DNA metabolic process	1937-03-01	200/18866	0.00699579	0.194777	0.157163	5888/8914/3320	3
BP	GO:0042493	response to drug	1937-04-01	397/18866	0.00737262	0.19739	0.159271	5888/3784/3066/811	4
BP	GO:0050766	positive regulation of phagocytosis	1937-02-01	68/18866	0.00785922	0.19739	0.159271	55646/811	2
BP	GO:0071479	cellular response to ionizing radiation	1937-02-01	68/18866	0.00785922	0.19739	0.159271	5888/1410	2
BP	GO:0031396	regulation of protein ubiquitination	1937-03-01	211/18866	0.00810106	0.19739	0.159271	3304/3320/6125	3
BP	GO:0006338	chromatin remodeling	1937-03-01	218/18866	0.00885517	0.19739	0.159271	3066/2186/5757	3
BP	GO:0042445	hormone metabolic process	1937-03-01	221/18866	0.00919059	0.19739	0.159271	10699/133/27344	3
BP	GO:0071241	cellular response to inorganic substance	1937-03-01	221/18866	0.00919059	0.19739	0.159271	5888/8914/811	3
BP	GO:1903524	positive regulation of blood circulation	1937-02-01	76/18866	0.00973655	0.19739	0.159271	3784/133	2
BP	GO:0044706	multi-multicellular organism process	1937-03-01	226/18866	0.00976607	0.19739	0.159271	10699/133/811	3
BP	GO:0006364	rRNA processing	1937-03-01	227/18866	0.00988364	0.19739	0.159271	55646/54853/6125	3
BP	GO:0043900	regulation of multi-organism process	1937-02-01	78/18866	0.0102341	0.19739	0.159271	3066/811	2
BP	GO:0019882	antigen processing and presentation	1937-03-01	232/18866	0.010484	0.19739	0.159271	50856/3108/811	3
BP	GO:0031397	negative regulation of protein ubiquitination	1937-02-01	80/18866	0.0107428	0.19739	0.159271	3304/6125	2
BP	GO:0042590	antigen processing and presentation of exogenous peptide antigen via MHC class I	1937-02-01	80/18866	0.0107428	0.19739	0.159271	50856/811	2
BP	GO:0006605	protein targeting	1937-04-01	444/18866	0.0108228	0.19739	0.159271	51100/3320/58477/6125	4
BP	GO:0010833	telomere maintenance via telomere lengthening	1937-02-01	81/18866	0.0110012	0.19739	0.159271	5888/3320	2
BP	GO:0016072	rRNA metabolic process	1937-03-01	238/18866	0.0112319	0.19739	0.159271	55646/54853/6125	3
BP	GO:0043254	regulation of protein-containing complex assembly	1937-04-01	449/18866	0.0112421	0.19739	0.159271	1410/3304/51100/3320	4
BP	GO:0009896	positive regulation of catabolic process	1937-04-01	454/18866	0.0116717	0.19739	0.159271	3304/51100/3320/26986	4
BP	GO:1903320	regulation of protein modification by small protein conjugation or removal	1937-03-01	242/18866	0.0117473	0.19739	0.159271	3304/3320/6125	3
BP	GO:2000779	regulation of double-strand break repair	1937-02-01	85/18866	0.0120624	0.19739	0.159271	5888/8914	2
BP	GO:0001892	embryonic placenta development	1937-02-01	89/18866	0.0131668	0.19739	0.159271	133/2186	2
BP	GO:0043044	ATP-dependent chromatin remodeling	1937-02-01	90/18866	0.0134496	0.19739	0.159271	3066/5757	2
BP	GO:0008016	regulation of heart contraction	1937-03-01	256/18866	0.0136582	0.19739	0.159271	10699/3784/133	3
BP	GO:0042475	odontogenesis of dentin-containing tooth	1937-02-01	91/18866	0.013735	0.19739	0.159271	3066/133	2
BP	GO:0031334	positive regulation of protein-containing complex assembly	1937-03-01	257/18866	0.013801	0.19739	0.159271	3304/51100/3320	3
BP	GO:1903321	negative regulation of protein modification by small protein conjugation or removal	1937-02-01	92/18866	0.014023	0.19739	0.159271	3304/6125	2
BP	GO:1903362	regulation of cellular protein catabolic process	1937-03-01	260/18866	0.0142348	0.19739	0.159271	3304/3320/6125	3
BP	GO:0022613	ribonucleoprotein complex biogenesis	1937-04-01	482/18866	0.0142747	0.19739	0.159271	55646/54853/3320/6125	4
BP	GO:0043312	neutrophil degranulation	1937-04-01	487/18866	0.0147755	0.19739	0.159271	3310/1675/3304/3320	4
BP	GO:0003073	regulation of systemic arterial blood pressure	1937-02-01	95/18866	0.0149028	0.19739	0.159271	10699/133	2
BP	GO:0002283	neutrophil activation involved in immune response	1937-04-01	490/18866	0.0150812	0.19739	0.159271	3310/1675/3304/3320	4
BP	GO:0050764	regulation of phagocytosis	1937-02-01	97/18866	0.0155023	0.19739	0.159271	55646/811	2
BP	GO:0002474	antigen processing and presentation of peptide antigen via MHC class I	1937-02-01	99/18866	0.0161121	0.19739	0.159271	50856/811	2
BP	GO:0006626	protein targeting to mitochondrion	1937-02-01	99/18866	0.0161121	0.19739	0.159271	51100/3320	2
BP	GO:0006260	DNA replication	1937-03-01	273/18866	0.0162043	0.19739	0.159271	5888/8208/8914	3
BP	GO:0002027	regulation of heart rate	1937-02-01	104/18866	0.017681	0.19739	0.159271	3784/133	2
BP	GO:0043279	response to alkaloid	1937-02-01	104/18866	0.017681	0.19739	0.159271	5888/3066	2
BP	GO:0071868	cellular response to monoamine stimulus	1937-02-01	106/18866	0.018326	0.19739	0.159271	3784/3066	2
BP	GO:0071870	cellular response to catecholamine stimulus	1937-02-01	106/18866	0.018326	0.19739	0.159271	3784/3066	2
BP	GO:0060047	heart contraction	1937-03-01	287/18866	0.0184893	0.19739	0.159271	10699/3784/133	3
BP	GO:0000018	regulation of DNA recombination	1937-02-01	107/18866	0.0186523	0.19739	0.159271	5888/8914	2
BP	GO:0034975	protein folding in endoplasmic reticulum	1937-01-01	10/18866	0.0194444	0.19739	0.159271	811	1
BP	GO:0036500	ATF6-mediated unfolded protein response	1937-01-01	10/18866	0.0194444	0.19739	0.159271	811	1
BP	GO:0043587	tongue morphogenesis	1937-01-01	10/18866	0.0194444	0.19739	0.159271	3066	1
BP	GO:0070424	regulation of nucleotide-binding oligomerization domain containing signaling pathway	1937-01-01	10/18866	0.0194444	0.19739	0.159271	3304	1
BP	GO:2000786	positive regulation of autophagosome assembly	1937-01-01	10/18866	0.0194444	0.19739	0.159271	51100	1
BP	GO:0051604	protein maturation	1937-03-01	293/18866	0.0195209	0.19739	0.159271	10699/27344/811	3
BP	GO:0032680	regulation of tumor necrosis factor production	1937-02-01	110/18866	0.0196458	0.19739	0.159271	50856/3066	2
BP	GO:0071867	response to monoamine	1937-02-01	110/18866	0.0196458	0.19739	0.159271	3784/3066	2
BP	GO:0071869	response to catecholamine	1937-02-01	110/18866	0.0196458	0.19739	0.159271	3784/3066	2
BP	GO:0003015	heart process	1937-03-01	297/18866	0.0202262	0.19739	0.159271	10699/3784/133	3
BP	GO:1903555	regulation of tumor necrosis factor superfamily cytokine production	1937-02-01	113/18866	0.0206612	0.19739	0.159271	50856/3066	2
BP	GO:1903522	regulation of blood circulation	1937-03-01	303/18866	0.0213104	0.19739	0.159271	10699/3784/133	3
BP	GO:0048102	autophagic cell death	1937-01-01	11/18866	0.0213685	0.19739	0.159271	51100	1
BP	GO:0070933	histone H4 deacetylation	1937-01-01	11/18866	0.0213685	0.19739	0.159271	3066	1
BP	GO:0090084	negative regulation of inclusion body assembly	1937-01-01	11/18866	0.0213685	0.19739	0.159271	3304	1
BP	GO:0099624	atrial cardiac muscle cell membrane repolarization	1937-01-01	11/18866	0.0213685	0.19739	0.159271	3784	1
BP	GO:1903265	positive regulation of tumor necrosis factor-mediated signaling pathway	1937-01-01	11/18866	0.0213685	0.19739	0.159271	3304	1
BP	GO:1905168	positive regulation of double-strand break repair via homologous recombination	1937-01-01	11/18866	0.0213685	0.19739	0.159271	8914	1
BP	GO:2001138	regulation of phospholipid transport	1937-01-01	11/18866	0.0213685	0.19739	0.159271	5244	1
BP	GO:2001140	positive regulation of phospholipid transport	1937-01-01	11/18866	0.0213685	0.19739	0.159271	5244	1
BP	GO:0032640	tumor necrosis factor production	1937-02-01	116/18866	0.0216982	0.19739	0.159271	50856/3066	2
BP	GO:0031109	microtubule polymerization or depolymerization	1937-02-01	117/18866	0.0220486	0.19739	0.159271	1410/3304	2
BP	GO:0042254	ribosome biogenesis	1937-03-01	310/18866	0.0226153	0.19739	0.159271	55646/54853/6125	3
BP	GO:0071706	tumor necrosis factor superfamily cytokine production	1937-02-01	119/18866	0.0227565	0.19739	0.159271	50856/3066	2
BP	GO:0000184	nuclear-transcribed mRNA catabolic process, nonsense-mediated decay	1937-02-01	120/18866	0.023114	0.19739	0.159271	6125/26986	2
BP	GO:0045047	protein targeting to ER	1937-02-01	120/18866	0.023114	0.19739	0.159271	58477/6125	2
BP	GO:0002468	dendritic cell antigen processing and presentation	1937-01-01	12/18866	0.0232889	0.19739	0.159271	50856	1
BP	GO:0044090	positive regulation of vacuole organization	1937-01-01	12/18866	0.0232889	0.19739	0.159271	51100	1
BP	GO:0060213	positive regulation of nuclear-transcribed mRNA poly(A) tail shortening	1937-01-01	12/18866	0.0232889	0.19739	0.159271	26986	1
BP	GO:0060453	regulation of gastric acid secretion	1937-01-01	12/18866	0.0232889	0.19739	0.159271	3784	1
BP	GO:0060670	branching involved in labyrinthine layer morphogenesis	1937-01-01	12/18866	0.0232889	0.19739	0.159271	133	1
BP	GO:0060788	ectodermal placode formation	1937-01-01	12/18866	0.0232889	0.19739	0.159271	3066	1
BP	GO:0071468	cellular response to acidic pH	1937-01-01	12/18866	0.0232889	0.19739	0.159271	342372	1
BP	GO:0071697	ectodermal placode morphogenesis	1937-01-01	12/18866	0.0232889	0.19739	0.159271	3066	1
BP	GO:2001214	positive regulation of vasculogenesis	1937-01-01	12/18866	0.0232889	0.19739	0.159271	133	1
BP	GO:0030218	erythrocyte differentiation	1937-02-01	121/18866	0.0234738	0.19739	0.159271	55646/3304	2
BP	GO:0007568	aging	1937-03-01	319/18866	0.0243563	0.19739	0.159271	1410/133/811	3
BP	GO:0072599	establishment of protein localization to endoplasmic reticulum	1937-02-01	124/18866	0.0245671	0.19739	0.159271	58477/6125	2
BP	GO:0030968	endoplasmic reticulum unfolded protein response	1937-02-01	125/18866	0.0249361	0.19739	0.159271	58477/811	2
BP	GO:0000722	telomere maintenance via recombination	1937-01-01	13/18866	0.0252057	0.19739	0.159271	5888	1
BP	GO:0010870	positive regulation of receptor biosynthetic process	1937-01-01	13/18866	0.0252057	0.19739	0.159271	3066	1
BP	GO:0032352	positive regulation of hormone metabolic process	1937-01-01	13/18866	0.0252057	0.19739	0.159271	133	1
BP	GO:0042921	glucocorticoid receptor signaling pathway	1937-01-01	13/18866	0.0252057	0.19739	0.159271	811	1
BP	GO:0061000	negative regulation of dendritic spine development	1937-01-01	13/18866	0.0252057	0.19739	0.159271	3066	1
BP	GO:0061029	eyelid development in camera-type eye	1937-01-01	13/18866	0.0252057	0.19739	0.159271	3066	1
BP	GO:0071696	ectodermal placode development	1937-01-01	13/18866	0.0252057	0.19739	0.159271	3066	1
BP	GO:0071872	cellular response to epinephrine stimulus	1937-01-01	13/18866	0.0252057	0.19739	0.159271	3784	1
BP	GO:1902947	regulation of tau-protein kinase activity	1937-01-01	13/18866	0.0252057	0.19739	0.159271	3320	1
BP	GO:0006898	receptor-mediated endocytosis	1937-03-01	328/18866	0.0261685	0.19739	0.159271	3320/133/811	3
BP	GO:0034101	erythrocyte homeostasis	1937-02-01	129/18866	0.026435	0.19739	0.159271	55646/3304	2
BP	GO:0071214	cellular response to abiotic stimulus	1937-03-01	331/18866	0.0267884	0.19739	0.159271	5888/1410/342372	3
BP	GO:0104004	cellular response to environmental stimulus	1937-03-01	331/18866	0.0267884	0.19739	0.159271	5888/1410/342372	3
BP	GO:0031958	corticosteroid receptor signaling pathway	1937-01-01	14/18866	0.0271187	0.19739	0.159271	811	1
BP	GO:0045472	response to ether	1937-01-01	14/18866	0.0271187	0.19739	0.159271	5244	1
BP	GO:0060211	regulation of nuclear-transcribed mRNA poly(A) tail shortening	1937-01-01	14/18866	0.0271187	0.19739	0.159271	26986	1
BP	GO:0060452	positive regulation of cardiac muscle contraction	1937-01-01	14/18866	0.0271187	0.19739	0.159271	3784	1
BP	GO:0070431	nucleotide-binding oligomerization domain containing 2 signaling pathway	1937-01-01	14/18866	0.0271187	0.19739	0.159271	3304	1
BP	GO:0071285	cellular response to lithium ion	1937-01-01	14/18866	0.0271187	0.19739	0.159271	811	1
BP	GO:0006282	regulation of DNA repair	1937-02-01	132/18866	0.0275827	0.19739	0.159271	5888/8914	2
BP	GO:0042476	odontogenesis	1937-02-01	132/18866	0.0275827	0.19739	0.159271	3066/133	2
BP	GO:0045346	regulation of MHC class II biosynthetic process	1937-01-01	15/18866	0.0290282	0.19739	0.159271	3066	1
BP	GO:0090148	membrane fission	1937-01-01	15/18866	0.0290282	0.19739	0.159271	51100	1
BP	GO:0045727	positive regulation of translation	1937-02-01	136/18866	0.0291439	0.19739	0.159271	6125/26986	2
BP	GO:0032273	positive regulation of protein polymerization	1937-02-01	137/18866	0.0295396	0.19739	0.159271	3304/3320	2
BP	GO:0000724	double-strand break repair via homologous recombination	1937-02-01	138/18866	0.0299376	0.19739	0.159271	5888/8914	2
BP	GO:0000725	recombinational repair	1937-02-01	140/18866	0.0307399	0.19739	0.159271	5888/8914	2
BP	GO:0072655	establishment of protein localization to mitochondrion	1937-02-01	140/18866	0.0307399	0.19739	0.159271	51100/3320	2
BP	GO:0006268	DNA unwinding involved in DNA replication	1937-01-01	16/18866	0.030934	0.19739	0.159271	5888	1
BP	GO:0043116	negative regulation of vascular permeability	1937-01-01	16/18866	0.030934	0.19739	0.159271	133	1
BP	GO:0045116	protein neddylation	1937-01-01	16/18866	0.030934	0.19739	0.159271	6125	1
BP	GO:0045342	MHC class II biosynthetic process	1937-01-01	16/18866	0.030934	0.19739	0.159271	3066	1
BP	GO:0045989	positive regulation of striated muscle contraction	1937-01-01	16/18866	0.030934	0.19739	0.159271	3784	1
BP	GO:0051444	negative regulation of ubiquitin-protein transferase activity	1937-01-01	16/18866	0.030934	0.19739	0.159271	6125	1
BP	GO:0061450	trophoblast cell migration	1937-01-01	16/18866	0.030934	0.19739	0.159271	811	1
BP	GO:0061684	chaperone-mediated autophagy	1937-01-01	16/18866	0.030934	0.19739	0.159271	3320	1
BP	GO:0071871	response to epinephrine	1937-01-01	16/18866	0.030934	0.19739	0.159271	3784	1
BP	GO:0090083	regulation of inclusion body assembly	1937-01-01	16/18866	0.030934	0.19739	0.159271	3304	1
BP	GO:1901163	regulation of trophoblast cell migration	1937-01-01	16/18866	0.030934	0.19739	0.159271	811	1
BP	GO:1902969	mitotic DNA replication	1937-01-01	16/18866	0.030934	0.19739	0.159271	5888	1
BP	GO:1903729	regulation of plasma membrane organization	1937-01-01	16/18866	0.030934	0.19739	0.159271	51100	1
BP	GO:2001212	regulation of vasculogenesis	1937-01-01	16/18866	0.030934	0.19739	0.159271	133	1
BP	GO:0007586	digestion	1937-02-01	141/18866	0.0311443	0.19739	0.159271	3784/440387	2
BP	GO:0032355	response to estradiol	1937-02-01	141/18866	0.0311443	0.19739	0.159271	1410/811	2
BP	GO:0009582	detection of abiotic stimulus	1937-02-01	144/18866	0.0323701	0.19739	0.159271	342372/8914	2
BP	GO:0010212	response to ionizing radiation	1937-02-01	144/18866	0.0323701	0.19739	0.159271	5888/1410	2
BP	GO:0070585	protein localization to mitochondrion	1937-02-01	144/18866	0.0323701	0.19739	0.159271	51100/3320	2
BP	GO:0000076	DNA replication checkpoint	1937-01-01	17/18866	0.0328361	0.19739	0.159271	8914	1
BP	GO:0002031	G protein-coupled receptor internalization	1937-01-01	17/18866	0.0328361	0.19739	0.159271	133	1
BP	GO:0006266	DNA ligation	1937-01-01	17/18866	0.0328361	0.19739	0.159271	5888	1
BP	GO:0006957	complement activation, alternative pathway	1937-01-01	17/18866	0.0328361	0.19739	0.159271	1675	1
BP	GO:0010566	regulation of ketone biosynthetic process	1937-01-01	17/18866	0.0328361	0.19739	0.159271	133	1
BP	GO:0031000	response to caffeine	1937-01-01	17/18866	0.0328361	0.19739	0.159271	3066	1
BP	GO:0042448	progesterone metabolic process	1937-01-01	17/18866	0.0328361	0.19739	0.159271	133	1
BP	GO:0048385	regulation of retinoic acid receptor signaling pathway	1937-01-01	17/18866	0.0328361	0.19739	0.159271	811	1
BP	GO:0070293	renal absorption	1937-01-01	17/18866	0.0328361	0.19739	0.159271	3784	1
BP	GO:1901673	regulation of mitotic spindle assembly	1937-01-01	17/18866	0.0328361	0.19739	0.159271	3304	1
BP	GO:0042542	response to hydrogen peroxide	1937-02-01	146/18866	0.0331978	0.198437	0.160116	1410/3066	2
BP	GO:0061337	cardiac conduction	1937-02-01	148/18866	0.0340339	0.198644	0.160283	10699/3784	2
BP	GO:0051052	regulation of DNA metabolic process	1937-03-01	365/18866	0.034365	0.198644	0.160283	5888/8914/3320	3
BP	GO:0014074	response to purine-containing compound	1937-02-01	149/18866	0.034455	0.198644	0.160283	3784/3066	2
BP	GO:1903364	positive regulation of cellular protein catabolic process	1937-02-01	149/18866	0.034455	0.198644	0.160283	3304/3320	2
BP	GO:0006349	regulation of gene expression by genetic imprinting	1937-01-01	18/18866	0.0347346	0.198644	0.160283	3784	1
BP	GO:0046885	regulation of hormone biosynthetic process	1937-01-01	18/18866	0.0347346	0.198644	0.160283	133	1
BP	GO:1900153	positive regulation of nuclear-transcribed mRNA catabolic process, deadenylation-dependent decay	1937-01-01	18/18866	0.0347346	0.198644	0.160283	26986	1
BP	GO:1990000	amyloid fibril formation	1937-01-01	18/18866	0.0347346	0.198644	0.160283	1410	1
BP	GO:0006261	DNA-dependent DNA replication	1937-02-01	151/18866	0.0353034	0.198739	0.160359	5888/8914	2
BP	GO:0045861	negative regulation of proteolysis	1937-03-01	369/18866	0.0353227	0.198739	0.160359	1410/6125/27344	3
BP	GO:0070972	protein localization to endoplasmic reticulum	1937-02-01	152/18866	0.0357306	0.198739	0.160359	58477/6125	2
BP	GO:0002262	myeloid cell homeostasis	1937-02-01	154/18866	0.0365912	0.198739	0.160359	55646/3304	2
BP	GO:0001696	gastric acid secretion	1937-01-01	19/18866	0.0366295	0.198739	0.160359	3784	1
BP	GO:0097320	plasma membrane tubulation	1937-01-01	19/18866	0.0366295	0.198739	0.160359	51100	1
BP	GO:0097623	potassium ion export across plasma membrane	1937-01-01	19/18866	0.0366295	0.198739	0.160359	3784	1
BP	GO:0098915	membrane repolarization during ventricular cardiac muscle cell action potential	1937-01-01	19/18866	0.0366295	0.198739	0.160359	3784	1
BP	GO:2000104	negative regulation of DNA-dependent DNA replication	1937-01-01	19/18866	0.0366295	0.198739	0.160359	8914	1
BP	GO:2000757	negative regulation of peptidyl-lysine acetylation	1937-01-01	19/18866	0.0366295	0.198739	0.160359	3066	1
BP	GO:0006402	mRNA catabolic process	1937-03-01	376/18866	0.0370319	0.199897	0.161294	3304/6125/26986	3
CC	GO:0101002	ficolin-1-rich granule	1939-04-01	124/19559	0.000106602	0.00858147	0.00740604	3310/1675/3304/3320	4
CC	GO:1904813	ficolin-1-rich granule lumen	1939-04-01	124/19559	0.000106602	0.00858147	0.00740604	3310/1675/3304/3320	4
CC	GO:0071682	endocytic vesicle lumen	1939-02-01	20/19559	0.000719573	0.0386171	0.0333276	3320/811	2
CC	GO:0005925	focal adhesion	1939-05-01	415/19559	0.00133438	0.046748	0.0403448	5244/3304/6125/811/26986	5
CC	GO:0030055	cell-substrate junction	1939-05-01	423/19559	0.0014518	0.046748	0.0403448	5244/3304/6125/811/26986	5
CC	GO:0008180	COP9 signalosome	1939-02-01	36/19559	0.0023384	0.0627471	0.0541524	3310/3304	2
CC	GO:0035861	site of double-strand break	1939-02-01	61/19559	0.00658269	0.151402	0.130664	5888/8914	2
CC	GO:0070603	SWI/SNF superfamily-type complex	1939-02-01	74/19559	0.00955889	0.187341	0.161681	3066/2186	2
CC	GO:1904949	ATPase complex	1939-02-01	78/19559	0.0105746	0.187341	0.161681	3066/2186	2
CC	GO:0090734	site of DNA damage	1939-02-01	82/19559	0.0116361	0.187341	0.161681	5888/8914	2
MF	GO:0051082	unfolded protein binding	1936-06-01	118/18352	1.03e-07	1.68e-05	1.26e-05	3310/1410/8208/3304/3320/811	6
MF	GO:0044183	protein folding chaperone	1936-03-01	27/18352	1.96e-05	0.00159008	0.0011985	3310/3304/811	3
MF	GO:0016887	ATPase activity	1936-06-01	423/18352	0.000156842	0.0084695	0.00638376	3310/5888/5244/3304/3320/2186	6
MF	GO:0031625	ubiquitin protein ligase binding	1936-05-01	297/18352	0.000268181	0.0108613	0.00818659	3310/3304/3320/6125/811	5
MF	GO:0044389	ubiquitin-like protein ligase binding	1936-05-01	316/18352	0.000356722	0.0115578	0.00871152	3310/3304/3320/6125/811	5
MF	GO:0023026	MHC class II protein complex binding	1936-02-01	16/18352	0.000441265	0.0119141	0.00898012	3108/3320	2
MF	GO:0070182	DNA polymerase binding	1936-02-01	20/18352	0.000695229	0.0160896	0.0121273	5888/3320	2
MF	GO:0023023	MHC protein complex binding	1936-02-01	25/18352	0.00109098	0.0220924	0.0166518	3108/3320	2
MF	GO:0051787	misfolded protein binding	1936-02-01	27/18352	0.00127331	0.0229195	0.0172753	3310/3304	2
MF	GO:0042826	histone deacetylase binding	1936-03-01	115/18352	0.00147205	0.0238472	0.0179745	3304/3320/3066	3
MF	GO:0031072	heat shock protein binding	1936-03-01	127/18352	0.00195583	0.028804	0.0217106	3310/3304/3066	3
MF	GO:0004252	serine-type endopeptidase activity	1936-03-01	169/18352	0.00438244	0.0591629	0.0445932	1675/10699/440387	3
MF	GO:0008236	serine-type peptidase activity	1936-03-01	187/18352	0.00580592	0.0665875	0.0501894	1675/10699/440387	3
MF	GO:0017171	serine hydrolase activity	1936-03-01	191/18352	0.0061556	0.0665875	0.0501894	1675/10699/440387	3
MF	GO:0097110	scaffold protein binding	1936-02-01	60/18352	0.00616551	0.0665875	0.0501894	3784/3320	2
MF	GO:0042393	histone binding	1936-03-01	238/18352	0.0112203	0.113606	0.0856287	8208/2186/5757	3
MF	GO:0030246	carbohydrate binding	1936-03-01	267/18352	0.0152625	0.145443	0.109626	50856/342372/811	3
MF	GO:0008094	DNA-dependent ATPase activity	1936-02-01	108/18352	0.0189781	0.148807	0.112161	5888/2186	2
MF	GO:0031078	histone deacetylase activity (H3-K14 specific)	1936-01-01	10/18352	0.0194489	0.148807	0.112161	3066	1
MF	GO:0032041	NAD-dependent histone deacetylase activity (H3-K14 specific)	1936-01-01	10/18352	0.0194489	0.148807	0.112161	3066	1
MF	GO:0008097	5S rRNA binding	1936-01-01	11/18352	0.0213734	0.148807	0.112161	6125	1
MF	GO:0008525	phosphatidylcholine transporter activity	1936-01-01	11/18352	0.0213734	0.148807	0.112161	5244	1
MF	GO:0140326	ATPase-coupled intramembrane lipid transporter activity	1936-01-01	11/18352	0.0213734	0.148807	0.112161	5244	1
MF	GO:0003730	mRNA 3'-UTR binding	1936-02-01	117/18352	0.0220455	0.148807	0.112161	6125/26986	2
MF	GO:1902282	voltage-gated potassium channel activity involved in ventricular cardiac muscle cell action potential repolarization	1936-01-01	12/18352	0.0232943	0.150947	0.113774	3784	1
MF	GO:0015271	outward rectifier potassium channel activity	1936-01-01	13/18352	0.0252115	0.151269	0.114017	3784	1
MF	GO:0034236	protein kinase A catalytic subunit binding	1936-01-01	13/18352	0.0252115	0.151269	0.114017	3784	1
MF	GO:0008494	translation activator activity	1936-01-01	14/18352	0.027125	0.151731	0.114365	26986	1
MF	GO:0001846	opsonin binding	1936-01-01	15/18352	0.0290349	0.151731	0.114365	811	1
MF	GO:0017136	NAD-dependent histone deacetylase activity	1936-01-01	15/18352	0.0290349	0.151731	0.114365	3066	1
MF	GO:0086008	voltage-gated potassium channel activity involved in cardiac muscle cell action potential repolarization	1936-01-01	15/18352	0.0290349	0.151731	0.114365	3784	1
MF	GO:0140297	DNA-binding transcription factor binding	1936-03-01	347/18352	0.0302047	0.151893	0.114487	3066/811/5757	3
MF	GO:0034979	NAD-dependent protein deacetylase activity	1936-01-01	16/18352	0.0309411	0.151893	0.114487	3066	1
MF	GO:0017116	single-stranded DNA helicase activity	1936-01-01	18/18352	0.0347427	0.160809	0.121208	5888	1
MF	GO:0055106	ubiquitin-protein transferase regulator activity	1936-01-01	18/18352	0.0347427	0.160809	0.121208	6125	1
MF	GO:0005537	mannose binding	1936-01-01	20/18352	0.0385298	0.172308	0.129875	50856	1
MF	GO:0001848	complement binding	1936-01-01	21/18352	0.0404179	0.172308	0.129875	811	1
MF	GO:0140303	intramembrane lipid transporter activity	1936-01-01	21/18352	0.0404179	0.172308	0.129875	5244	1
MF	GO:0008143	poly(A) binding	1936-01-01	23/18352	0.0441833	0.175399	0.132204	26986	1
MF	GO:0005212	structural constituent of eye lens	1936-01-01	24/18352	0.0460606	0.175399	0.132204	1410	1
MF	GO:0004407	histone deacetylase activity	1936-01-01	25/18352	0.0479344	0.175399	0.132204	3066	1
MF	GO:0008266	poly(U) RNA binding	1936-01-01	26/18352	0.0498045	0.175399	0.132204	26986	1
MF	GO:0008527	taste receptor activity	1936-01-01	26/18352	0.0498045	0.175399	0.132204	342372	1
MF	GO:0033558	protein deacetylase activity	1936-01-01	26/18352	0.0498045	0.175399	0.132204	3066	1
MF	GO:0034237	protein kinase A regulatory subunit binding	1936-01-01	26/18352	0.0498045	0.175399	0.132204	3784	1
MF	GO:0048027	mRNA 5'-UTR binding	1936-01-01	26/18352	0.0498045	0.175399	0.132204	6125	1
MF	GO:0008022	protein C-terminus binding	1936-02-01	189/18352	0.0528856	0.175956	0.132624	5888/26986	2
MF	GO:0050681	androgen receptor binding	1936-01-01	28/18352	0.0535341	0.175956	0.132624	811	1
MF	GO:0004175	endopeptidase activity	1936-03-01	440/18352	0.054563	0.175956	0.132624	1675/10699/440387	3
MF	GO:0008187	poly-pyrimidine tract binding	1936-01-01	29/18352	0.0553936	0.175956	0.132624	26986	1
MF	GO:0070717	poly-purine tract binding	1936-01-01	29/18352	0.0553936	0.175956	0.132624	26986	1
MF	GO:0008157	protein phosphatase 1 binding	1936-01-01	30/18352	0.0572495	0.178354	0.134432	3784	1
MF	GO:0051059	NF-kappaB binding	1936-01-01	31/18352	0.0591019	0.180651	0.136163	3066	1
MF	GO:0005251	delayed rectifier potassium channel activity	1936-01-01	33/18352	0.062796	0.188388	0.141995	3784	1
MF	GO:0001103	RNA polymerase II repressing transcription factor binding	1936-01-01	35/18352	0.066476	0.195802	0.147583	3066	1
MF	GO:0097718	disordered domain specific binding	1936-01-01	36/18352	0.0683107	0.197613	0.148948	3320	1

## Sheet: Table S6
ONTOLOGY	ID	Description	GeneRatio	BgRatio	pvalue	p.adjust	qvalue	geneID	Count
BP	GO:0019886	antigen processing and presentation of exogenous peptide antigen via MHC class II	1944-09-01	99/18866	1.26749e-12	8.35218e-10	6.01984e-10	3127/3117/3118/3123/3109/972/3113/10437/3122	9
BP	GO:0002495	antigen processing and presentation of peptide antigen via MHC class II	1944-09-01	103/18866	1.82537e-12	8.35218e-10	6.01984e-10	3127/3117/3118/3123/3109/972/3113/10437/3122	9
BP	GO:0002504	antigen processing and presentation of peptide or polysaccharide antigen via MHC class II	1944-09-01	104/18866	1.99495e-12	8.35218e-10	6.01984e-10	3127/3117/3118/3123/3109/972/3113/10437/3122	9
BP	GO:0002478	antigen processing and presentation of exogenous peptide antigen	1944-10-01	177/18866	7.70671e-12	2.41991e-09	1.74415e-09	3127/3117/3118/3123/3109/972/3113/1536/10437/3122	10
BP	GO:0071346	cellular response to interferon-gamma	1944-10-01	182/18866	1.01721e-11	2.50557e-09	1.80589e-09	6348/3127/3117/3118/3123/199/3113/10437/9111/3122	10
BP	GO:0019884	antigen processing and presentation of exogenous antigen	1944-10-01	185/18866	1.19693e-11	2.50557e-09	1.80589e-09	3127/3117/3118/3123/3109/972/3113/1536/10437/3122	10
BP	GO:0048002	antigen processing and presentation of peptide antigen	1944-10-01	194/18866	1.91861e-11	3.44254e-09	2.48121e-09	3127/3117/3118/3123/3109/972/3113/1536/10437/3122	10
BP	GO:0034341	response to interferon-gamma	1944-10-01	202/18866	2.86331e-11	4.4954e-09	3.24006e-09	6348/3127/3117/3118/3123/199/3113/10437/9111/3122	10
BP	GO:0060333	interferon-gamma-mediated signaling pathway	1944-08-01	91/18866	3.29107e-11	4.59287e-09	3.31032e-09	3127/3117/3118/3123/3113/10437/9111/3122	8
BP	GO:0019882	antigen processing and presentation	1944-10-01	232/18866	1.12098e-10	1.40795e-08	1.01478e-08	3127/3117/3118/3123/3109/972/3113/1536/10437/3122	10
BP	GO:0045657	positive regulation of monocyte differentiation	1944-04-01	11/18866	8.3893e-09	9.57905e-07	6.90411e-07	2242/3123/972/677	4
BP	GO:0030224	monocyte differentiation	1944-05-01	38/18866	2.58692e-08	2.49937e-06	1.80142e-06	2242/3123/1436/972/677	5
BP	GO:1903131	mononuclear cell differentiation	1944-05-01	38/18866	2.58692e-08	2.49937e-06	1.80142e-06	2242/3123/1436/972/677	5
BP	GO:0045655	regulation of monocyte differentiation	1944-04-01	22/18866	1.82523e-07	1.63749e-05	1.18022e-05	2242/3123/972/677	4
BP	GO:0002763	positive regulation of myeloid leukocyte differentiation	1944-05-01	58/18866	2.28149e-07	1.91037e-05	1.3769e-05	7305/2242/3123/972/677	5
BP	GO:0002761	regulation of myeloid leukocyte differentiation	1944-06-01	123/18866	3.91556e-07	3.07372e-05	2.21538e-05	7305/2242/6348/3123/972/677	6
BP	GO:0002573	myeloid leukocyte differentiation	1944-07-01	210/18866	5.17653e-07	3.82454e-05	2.75654e-05	7305/2242/6348/3123/1436/972/677	7
BP	GO:0150076	neuroinflammatory response	1944-05-01	77/18866	9.52062e-07	6.64328e-05	4.78815e-05	7305/6348/712/199/5743	5
BP	GO:0070663	regulation of leukocyte proliferation	1944-07-01	240/18866	1.26777e-06	8.38065e-05	6.04036e-05	7305/3123/199/3109/1436/972/3113	7
BP	GO:0042116	macrophage activation	1944-05-01	101/18866	3.66211e-06	0.000219029	0.000157865	7305/6348/712/199/972	5
BP	GO:0045639	positive regulation of myeloid cell differentiation	1944-05-01	101/18866	3.66211e-06	0.000219029	0.000157865	7305/2242/3123/972/677	5
BP	GO:1902105	regulation of leukocyte differentiation	1944-07-01	290/18866	4.44145e-06	0.000253566	0.000182758	7305/2242/6348/3123/639/972/677	7
BP	GO:0001774	microglial cell activation	1944-04-01	50/18866	5.47982e-06	0.000286777	0.000206695	7305/6348/712/199	4
BP	GO:0002269	leukocyte activation involved in inflammatory response	1944-04-01	50/18866	5.47982e-06	0.000286777	0.000206695	7305/6348/712/199	4
BP	GO:0070661	leukocyte proliferation	1944-07-01	313/18866	7.32217e-06	0.000367866	0.00026514	7305/3123/199/3109/1436/972/3113	7
BP	GO:0050852	T cell receptor signaling pathway	1944-06-01	206/18866	7.87106e-06	0.000380233	0.000274053	3127/3117/3118/3123/3113/3122	6
BP	GO:0050670	regulation of lymphocyte proliferation	1944-06-01	219/18866	1.11591e-05	0.000508954	0.000366829	7305/3123/199/3109/972/3113	6
BP	GO:0061900	glial cell activation	1944-04-01	60/18866	1.14078e-05	0.000508954	0.000366829	7305/6348/712/199	4
BP	GO:0032944	regulation of mononuclear cell proliferation	1944-06-01	221/18866	1.17513e-05	0.000508954	0.000366829	7305/3123/199/3109/972/3113	6
BP	GO:0070665	positive regulation of leukocyte proliferation	1944-05-01	150/18866	2.51368e-05	0.00105239	0.000758513	199/3109/1436/972/3113	5
BP	GO:0045637	regulation of myeloid cell differentiation	1944-06-01	263/18866	3.13804e-05	0.00127141	0.000916371	7305/2242/6348/3123/972/677	6
BP	GO:1902107	positive regulation of leukocyte differentiation	1944-05-01	159/18866	3.32487e-05	0.00130501	0.000940589	7305/2242/3123/972/677	5
BP	GO:0046651	lymphocyte proliferation	1944-06-01	283/18866	4.72466e-05	0.00179787	0.00129581	7305/3123/199/3109/972/3113	6
BP	GO:0050867	positive regulation of cell activation	1944-07-01	421/18866	4.92342e-05	0.00179787	0.00129581	7305/6348/199/3109/972/3113/353514	7
BP	GO:0032943	mononuclear cell proliferation	1944-06-01	286/18866	5.00998e-05	0.00179787	0.00129581	7305/3123/199/3109/972/3113	6
BP	GO:0032755	positive regulation of interleukin-6 production	1944-04-01	88/18866	5.20246e-05	0.00181508	0.00130822	7305/199/972/353514	4
BP	GO:0030099	myeloid cell differentiation	1944-07-01	431/18866	5.70985e-05	0.00193826	0.001397	7305/2242/6348/3123/1436/972/677	7
BP	GO:0001819	positive regulation of cytokine production	1944-07-01	447/18866	7.1808e-05	0.0023547	0.00169715	7305/6348/199/5743/972/3113/353514	7
BP	GO:0002690	positive regulation of leukocyte chemotaxis	1944-04-01	96/18866	7.31157e-05	0.0023547	0.00169715	6348/199/1436/972	4
BP	GO:0050851	antigen receptor-mediated signaling pathway	1944-06-01	325/18866	0.000101476	0.00305043	0.0021986	3127/3117/3118/3123/3113/3122	6
BP	GO:0070371	ERK1 and ERK2 cascade	1944-06-01	325/18866	0.000101476	0.00305043	0.0021986	6348/3123/1436/1848/972/677	6
BP	GO:2000249	regulation of actin cytoskeleton reorganization	1944-03-01	39/18866	0.000102005	0.00305043	0.0021986	2242/10788/1436	3
BP	GO:1903708	positive regulation of hemopoiesis	1944-05-01	204/18866	0.000108493	0.00316899	0.00228405	7305/2242/3123/972/677	5
BP	GO:0050863	regulation of T cell activation	1944-06-01	332/18866	0.000114038	0.00325004	0.00234247	3123/199/3109/639/972/3113	6
BP	GO:0042110	T cell activation	1944-07-01	483/18866	0.000116442	0.00325004	0.00234247	3123/199/3109/639/972/3113/677	7
BP	GO:0071470	cellular response to osmotic stress	1944-03-01	42/18866	0.00012751	0.00348157	0.00250935	5743/92241/677	3
BP	GO:1903706	regulation of hemopoiesis	1944-07-01	498/18866	0.000140727	0.00376069	0.00271052	7305/2242/6348/3123/639/972/677	7
BP	GO:0097529	myeloid leukocyte migration	1944-05-01	222/18866	0.000161176	0.00421745	0.00303973	6348/199/1436/972/2920	5
BP	GO:0062197	cellular response to chemical stress	1944-06-01	360/18866	0.000177218	0.00454256	0.00327405	199/5743/92241/79109/677/1536	6
BP	GO:0002688	regulation of leukocyte chemotaxis	1944-04-01	124/18866	0.000196921	0.00487272	0.00351202	6348/199/1436/972	4
BP	GO:0030595	leukocyte chemotaxis	1944-05-01	232/18866	0.000197857	0.00487272	0.00351202	6348/199/1436/972/2920	5
BP	GO:0071621	granulocyte chemotaxis	1944-04-01	127/18866	0.000215835	0.00521324	0.00375745	6348/1436/972/2920	4
BP	GO:0046598	positive regulation of viral entry into host cell	1944-02-01	10/18866	0.000236395	0.00549838	0.00396296	3123/972	2
BP	GO:0075294	positive regulation by symbiont of entry into host	1944-02-01	10/18866	0.000236395	0.00549838	0.00396296	3123/972	2
BP	GO:0032731	positive regulation of interleukin-1 beta production	1944-03-01	53/18866	0.000255581	0.00583655	0.0042067	7305/6348/353514	3
BP	GO:0050671	positive regulation of lymphocyte proliferation	1944-04-01	136/18866	0.000280435	0.00603925	0.0043528	199/3109/972/3113	4
BP	GO:0032946	positive regulation of mononuclear cell proliferation	1944-04-01	137/18866	0.000288381	0.00603925	0.0043528	199/3109/972/3113	4
BP	GO:0090269	fibroblast growth factor production	1944-02-01	11/18866	0.000288499	0.00603925	0.0043528	199/5743	2
BP	GO:0090270	regulation of fibroblast growth factor production	1944-02-01	11/18866	0.000288499	0.00603925	0.0043528	199/5743	2
BP	GO:0098883	synapse pruning	1944-02-01	11/18866	0.000288499	0.00603925	0.0043528	712/713	2
BP	GO:0002687	positive regulation of leukocyte migration	1944-04-01	142/18866	0.000330557	0.00680622	0.00490559	6348/199/1436/972	4
BP	GO:0002696	positive regulation of leukocyte activation	1944-06-01	406/18866	0.000338295	0.00684136	0.00493092	7305/6348/199/3109/972/3113	6
BP	GO:0031392	regulation of prostaglandin biosynthetic process	1944-02-01	12/18866	0.000345686	0.00684136	0.00493092	5743/972	2
BP	GO:0050921	positive regulation of chemotaxis	1944-04-01	144/18866	0.000348605	0.00684136	0.00493092	6348/199/1436/972	4
BP	GO:0032653	regulation of interleukin-10 production	1944-03-01	60/18866	0.000369121	0.00702449	0.00506291	7305/3123/353514	3
BP	GO:0032732	positive regulation of interleukin-1 production	1944-03-01	60/18866	0.000369121	0.00702449	0.00506291	7305/6348/353514	3
BP	GO:0097530	granulocyte migration	1944-04-01	150/18866	0.000406984	0.00762944	0.00549892	6348/1436/972/2920	4
BP	GO:0032613	interleukin-10 production	1944-03-01	63/18866	0.000426268	0.00787342	0.00567477	7305/3123/353514	3
BP	GO:0008360	regulation of cell shape	1944-04-01	156/18866	0.000472046	0.00852673	0.00614565	2242/6348/1436/221472	4
BP	GO:2001279	regulation of unsaturated fatty acid biosynthetic process	1944-02-01	14/18866	0.000475216	0.00852673	0.00614565	5743/972	2
BP	GO:0032675	regulation of interleukin-6 production	1944-04-01	159/18866	0.000507215	0.00897271	0.00646709	7305/199/972/353514	4
BP	GO:0031960	response to corticosteroid	1944-04-01	164/18866	0.000569923	0.00994199	0.0071657	199/5743/677/1536	4
BP	GO:0042129	regulation of T cell proliferation	1944-04-01	167/18866	0.000610091	0.0104969	0.00756565	3123/199/3109/3113	4
BP	GO:0032635	interleukin-6 production	1944-04-01	170/18866	0.000652232	0.0110703	0.00797894	7305/199/972/353514	4
BP	GO:0002683	negative regulation of immune system process	1944-06-01	463/18866	0.000677186	0.0113406	0.00817375	7305/6348/3123/972/677/9111	6
BP	GO:0070372	regulation of ERK1 and ERK2 cascade	1944-05-01	306/18866	0.000702716	0.0116133	0.0083703	6348/3123/1436/1848/972	5
BP	GO:0002697	regulation of immune effector process	1944-06-01	470/18866	0.000732404	0.0119467	0.00861062	7305/2242/712/713/3109/972	6
BP	GO:0060326	cell chemotaxis	1944-05-01	311/18866	0.000755908	0.0121721	0.00877302	6348/199/1436/972/2920	5
BP	GO:0002429	immune response-activating cell surface receptor signaling pathway	1944-06-01	481/18866	0.000826174	0.0129709	0.00934882	3127/3117/3118/3123/3113/3122	6
BP	GO:0002757	immune response-activating signal transduction	1944-06-01	481/18866	0.000826174	0.0129709	0.00934882	3127/3117/3118/3123/3113/3122	6
BP	GO:0150146	cell junction disassembly	1944-02-01	19/18866	0.000886394	0.0137446	0.00990641	712/713	2
BP	GO:1903037	regulation of leukocyte cell-cell adhesion	1944-05-01	329/18866	0.00097268	0.0148986	0.0107382	3123/199/3109/972/3113	5
BP	GO:0006970	response to osmotic stress	1944-03-01	85/18866	0.00102302	0.0154809	0.0111579	5743/92241/677	3
BP	GO:0030502	negative regulation of bone mineralization	1944-02-01	21/18866	0.00108533	0.0160683	0.0115812	5552/6348	2
BP	GO:0042098	T cell proliferation	1944-04-01	195/18866	0.00108742	0.0160683	0.0115812	3123/199/3109/3113	4
BP	GO:0045723	positive regulation of fatty acid biosynthetic process	1944-02-01	23/18866	0.0013037	0.0190401	0.0137232	5743/972	2
BP	GO:0051251	positive regulation of lymphocyte activation	1944-05-01	357/18866	0.00139786	0.0201758	0.0145418	7305/199/3109/972/3113	5
BP	GO:0034629	cellular protein-containing complex localization	1944-02-01	24/18866	0.00142011	0.0201758	0.0145418	7127/54468	2
BP	GO:0001818	negative regulation of cytokine production	1944-05-01	360/18866	0.00145043	0.0201758	0.0145418	5552/7305/3123/353514/9111	5
BP	GO:0002685	regulation of leukocyte migration	1944-04-01	212/18866	0.00147989	0.0201758	0.0145418	6348/199/1436/972	4
BP	GO:0032651	regulation of interleukin-1 beta production	1944-03-01	97/18866	0.00149769	0.0201758	0.0145418	7305/6348/353514	3
BP	GO:0071674	mononuclear cell migration	1944-03-01	97/18866	0.00149769	0.0201758	0.0145418	6348/199/1436	3
BP	GO:1901216	positive regulation of neuron death	1944-03-01	97/18866	0.00149769	0.0201758	0.0145418	7305/6348/712	3
BP	GO:0007159	leukocyte cell-cell adhesion	1944-05-01	364/18866	0.00152278	0.0201758	0.0145418	3123/199/3109/972/3113	5
BP	GO:0050870	positive regulation of T cell activation	1944-04-01	214/18866	0.00153176	0.0201758	0.0145418	199/3109/972/3113	4
BP	GO:0030316	osteoclast differentiation	1944-03-01	98/18866	0.00154249	0.0201758	0.0145418	7305/6348/1436	3
BP	GO:0070374	positive regulation of ERK1 and ERK2 cascade	1944-04-01	215/18866	0.00155817	0.0201758	0.0145418	6348/3123/1436/972	4
BP	GO:0050792	regulation of viral process	1944-04-01	217/18866	0.00161193	0.020659	0.01489	6348/3123/1436/972	4
BP	GO:1905523	positive regulation of macrophage migration	1944-02-01	26/18866	0.00166729	0.0211245	0.0152255	6348/1436	2
BP	GO:0042102	positive regulation of T cell proliferation	1944-03-01	101/18866	0.00168189	0.0211245	0.0152255	199/3109/3113	3
BP	GO:0006959	humoral immune response	1944-05-01	377/18866	0.00177642	0.0217176	0.0156529	712/713/3123/2920/4069	5
BP	GO:0030593	neutrophil chemotaxis	1944-03-01	103/18866	0.00177907	0.0217176	0.0156529	6348/972/2920	3
BP	GO:0002699	positive regulation of immune effector process	1944-04-01	223/18866	0.00178098	0.0217176	0.0156529	7305/2242/3109/972	4
BP	GO:0031532	actin cytoskeleton reorganization	1944-03-01	105/18866	0.00187969	0.0224854	0.0162064	2242/10788/1436	3
BP	GO:0016064	immunoglobulin mediated immune response	1944-04-01	227/18866	0.0019003	0.0224854	0.0162064	712/713/3123/972	4
BP	GO:0032611	interleukin-1 beta production	1944-03-01	106/18866	0.00193131	0.0224854	0.0162064	7305/6348/353514	3
BP	GO:2000379	positive regulation of reactive oxygen species metabolic process	1944-03-01	106/18866	0.00193131	0.0224854	0.0162064	7305/199/5743	3
BP	GO:1990776	response to angiotensin	1944-02-01	28/18866	0.00193346	0.0224854	0.0162064	5743/1536	2
BP	GO:0050920	regulation of chemotaxis	1944-04-01	229/18866	0.00196199	0.0225554	0.0162568	6348/199/1436/972	4
BP	GO:0048524	positive regulation of viral process	1944-03-01	107/18866	0.0019838	0.0225554	0.0162568	3123/1436/972	3
BP	GO:0019724	B cell mediated immunity	1944-04-01	230/18866	0.00199335	0.0225554	0.0162568	712/713/3123/972	4
BP	GO:0043903	regulation of symbiotic process	1944-04-01	231/18866	0.00202506	0.0227096	0.0163679	6348/3123/1436/972	4
BP	GO:0001782	B cell homeostasis	1944-02-01	29/18866	0.0020736	0.0230482	0.016612	972/139818	2
BP	GO:1903039	positive regulation of leukocyte cell-cell adhesion	1944-04-01	235/18866	0.00215539	0.0234147	0.0168762	199/3109/972/3113	4
BP	GO:0032652	regulation of interleukin-1 production	1944-03-01	111/18866	0.00220266	0.0234147	0.0168762	7305/6348/353514	3
BP	GO:0001516	prostaglandin biosynthetic process	1944-02-01	30/18866	0.00221843	0.0234147	0.0168762	5743/972	2
BP	GO:0046457	prostanoid biosynthetic process	1944-02-01	30/18866	0.00221843	0.0234147	0.0168762	5743/972	2
BP	GO:0070168	negative regulation of biomineral tissue development	1944-02-01	30/18866	0.00221843	0.0234147	0.0168762	5552/6348	2
BP	GO:0110150	negative regulation of biomineralization	1944-02-01	30/18866	0.00221843	0.0234147	0.0168762	5552/6348	2
BP	GO:0030282	bone mineralization	1944-03-01	117/18866	0.00255817	0.0267755	0.0192985	5552/6348/5743	3
BP	GO:0032612	interleukin-1 production	1944-03-01	121/18866	0.00281378	0.0292075	0.0210513	7305/6348/353514	3
BP	GO:0032814	regulation of natural killer cell activation	1944-02-01	34/18866	0.00284414	0.0292807	0.0211041	7305/639	2
BP	GO:1990266	neutrophil migration	1944-03-01	122/18866	0.00288005	0.0294093	0.0211968	6348/972/2920	3
BP	GO:0001893	maternal placenta development	1944-02-01	36/18866	0.00318453	0.0314942	0.0226995	5743/639	2
BP	GO:0033280	response to vitamin D	1944-02-01	36/18866	0.00318453	0.0314942	0.0226995	2242/5743	2
BP	GO:0042554	superoxide anion generation	1944-02-01	36/18866	0.00318453	0.0314942	0.0226995	7305/1536	2
BP	GO:0071634	regulation of transforming growth factor beta production	1944-02-01	36/18866	0.00318453	0.0314942	0.0226995	7305/5743	2
BP	GO:1903409	reactive oxygen species biosynthetic process	1944-03-01	128/18866	0.00329794	0.032361	0.0233242	199/5743/1536	3
BP	GO:0022407	regulation of cell-cell adhesion	1944-05-01	439/18866	0.00343191	0.0334146	0.0240836	3123/199/3109/972/3113	5
BP	GO:0045923	positive regulation of fatty acid metabolic process	1944-02-01	38/18866	0.00354304	0.0334591	0.0241157	5743/972	2
BP	GO:0046596	regulation of viral entry into host cell	1944-02-01	38/18866	0.00354304	0.0334591	0.0241157	3123/972	2
BP	GO:0071604	transforming growth factor beta production	1944-02-01	38/18866	0.00354304	0.0334591	0.0241157	7305/5743	2
BP	GO:2000403	positive regulation of lymphocyte migration	1944-02-01	38/18866	0.00354304	0.0334591	0.0241157	6348/199	2
BP	GO:0022409	positive regulation of cell-cell adhesion	1944-04-01	279/18866	0.00399254	0.0374226	0.0269724	199/3109/972/3113	4
BP	GO:0048246	macrophage chemotaxis	1944-02-01	42/18866	0.00431378	0.0401341	0.0289267	6348/1436	2
BP	GO:0072593	reactive oxygen species metabolic process	1944-04-01	288/18866	0.00446806	0.0412639	0.029741	7305/199/5743/1536	4
BP	GO:0150077	regulation of neuroinflammatory response	1944-02-01	43/18866	0.00451753	0.0414162	0.0298507	6348/5743	2
BP	GO:1905521	regulation of macrophage migration	1944-02-01	44/18866	0.00472567	0.0430104	0.0309998	6348/1436	2
BP	GO:0051384	response to glucocorticoid	1944-03-01	147/18866	0.00485916	0.0439072	0.0316462	199/5743/677	3
BP	GO:0045429	positive regulation of nitric oxide biosynthetic process	1944-02-01	45/18866	0.00493817	0.0439882	0.0317046	199/5743	2
BP	GO:0052372	modulation by symbiont of entry into host	1944-02-01	45/18866	0.00493817	0.0439882	0.0317046	3123/972	2
BP	GO:1904407	positive regulation of nitric oxide metabolic process	1944-02-01	46/18866	0.00515502	0.0455965	0.0328637	199/5743	2
BP	GO:0043312	neutrophil degranulation	1944-05-01	487/18866	0.00532173	0.0467419	0.0336893	3903/7305/10788/1536/4069	5
BP	GO:0030225	macrophage differentiation	1944-02-01	47/18866	0.00537619	0.0468923	0.0337977	3123/1436	2
BP	GO:0002283	neutrophil activation involved in immune response	1944-05-01	490/18866	0.00546019	0.0472966	0.034089	3903/7305/10788/1536/4069	5
BP	GO:0051250	negative regulation of lymphocyte activation	1944-03-01	154/18866	0.0055293	0.0475672	0.0342841	7305/3123/972	3
BP	GO:0002455	humoral immune response mediated by circulating immunoglobulin	1944-03-01	155/18866	0.00562934	0.0480983	0.0346669	712/713/3123	3
BP	GO:0001890	placenta development	1944-03-01	156/18866	0.00573046	0.0486315	0.0350512	5743/639/677	3
BP	GO:0006692	prostanoid metabolic process	1944-02-01	49/18866	0.00583142	0.0488285	0.0351932	5743/972	2
BP	GO:0006693	prostaglandin metabolic process	1944-02-01	49/18866	0.00583142	0.0488285	0.0351932	5743/972	2
BP	GO:0050729	positive regulation of inflammatory response	1944-03-01	158/18866	0.00593598	0.0490499	0.0353528	6348/5743/353514	3
BP	GO:1903707	negative regulation of hemopoiesis	1944-03-01	158/18866	0.00593598	0.0490499	0.0353528	6348/972/677	3
CC	GO:0042613	MHC class II protein complex	1945-08-01	16/19559	5.16003e-18	5.98563e-16	3.3676e-16	3127/3117/3118/3123/3109/972/3113/3122	8
CC	GO:0042611	MHC protein complex	1945-08-01	25/19559	4.27118e-16	2.47728e-14	1.39375e-14	3127/3117/3118/3123/3109/972/3113/3122	8
CC	GO:0071556	integral component of lumenal side of endoplasmic reticulum membrane	1945-07-01	29/19559	3.14346e-13	9.11603e-12	5.1288e-12	3127/3117/3118/3123/972/3113/3122	7
CC	GO:0098553	lumenal side of endoplasmic reticulum membrane	1945-07-01	29/19559	3.14346e-13	9.11603e-12	5.1288e-12	3127/3117/3118/3123/972/3113/3122	7
CC	GO:0098576	lumenal side of membrane	1945-07-01	36/19559	1.66133e-12	3.85428e-11	2.16847e-11	3127/3117/3118/3123/972/3113/3122	7
CC	GO:0030669	clathrin-coated endocytic vesicle membrane	1945-07-01	40/19559	3.68519e-12	7.1247e-11	4.00845e-11	3127/3117/3118/3123/972/3113/3122	7
CC	GO:0045334	clathrin-coated endocytic vesicle	1945-07-01	59/19559	6.5286e-11	1.08188e-09	6.08682e-10	3127/3117/3118/3123/972/3113/3122	7
CC	GO:0012507	ER to Golgi transport vesicle membrane	1945-07-01	62/19559	9.36356e-11	1.35772e-09	7.63869e-10	3127/3117/3118/3123/972/3113/3122	7
CC	GO:0032588	trans-Golgi network membrane	1945-07-01	94/19559	1.84543e-09	2.30704e-08	1.29797e-08	3127/3117/3118/3123/972/3113/3122	7
CC	GO:0030134	COPII-coated ER to Golgi transport vesicle	1945-07-01	95/19559	1.98883e-09	2.30704e-08	1.29797e-08	3127/3117/3118/3123/972/3113/3122	7
CC	GO:0030666	endocytic vesicle membrane	1945-08-01	164/19559	3.40852e-09	3.59444e-08	2.02228e-08	3127/3117/3118/3123/972/3113/1536/3122	8
CC	GO:0030660	Golgi-associated vesicle membrane	1945-07-01	112/19559	6.33413e-09	6.12299e-08	3.44488e-08	3127/3117/3118/3123/972/3113/3122	7
CC	GO:0030665	clathrin-coated vesicle membrane	1945-07-01	118/19559	9.12419e-09	8.14159e-08	4.58057e-08	3127/3117/3118/3123/972/3113/3122	7
CC	GO:0030176	integral component of endoplasmic reticulum membrane	1945-07-01	158/19559	6.88973e-08	5.70864e-07	3.21175e-07	3127/3117/3118/3123/972/3113/3122	7
CC	GO:0031227	intrinsic component of endoplasmic reticulum membrane	1945-07-01	166/19559	9.66692e-08	7.47576e-07	4.20596e-07	3127/3117/3118/3123/972/3113/3122	7
CC	GO:0005765	lysosomal membrane	1945-09-01	375/19559	1.53254e-07	1.04573e-06	5.88342e-07	3127/3117/3118/3123/3109/972/3113/54468/3122	9
CC	GO:0098852	lytic vacuole membrane	1945-09-01	375/19559	1.53254e-07	1.04573e-06	5.88342e-07	3127/3117/3118/3123/3109/972/3113/54468/3122	9
CC	GO:0005798	Golgi-associated vesicle	1945-07-01	181/19559	1.74515e-07	1.12465e-06	6.32743e-07	3127/3117/3118/3123/972/3113/3122	7
CC	GO:0030662	coated vesicle membrane	1945-07-01	183/19559	1.88071e-07	1.14822e-06	6.46004e-07	3127/3117/3118/3123/972/3113/3122	7
CC	GO:0030136	clathrin-coated vesicle	1945-07-01	194/19559	2.79583e-07	1.62158e-06	9.12324e-07	3127/3117/3118/3123/972/3113/3122	7
CC	GO:0005774	vacuolar membrane	1945-09-01	427/19559	4.5735e-07	2.43939e-06	1.37243e-06	3127/3117/3118/3123/3109/972/3113/54468/3122	9
CC	GO:0030658	transport vesicle membrane	1945-07-01	209/19559	4.62643e-07	2.43939e-06	1.37243e-06	3127/3117/3118/3123/972/3113/3122	7
CC	GO:0030139	endocytic vesicle	1945-08-01	313/19559	5.06708e-07	2.55557e-06	1.4378e-06	3127/3117/3118/3123/972/3113/1536/3122	8
CC	GO:0005802	trans-Golgi network	1945-07-01	245/19559	1.34342e-06	6.49319e-06	3.65316e-06	3127/3117/3118/3123/972/3113/3122	7
CC	GO:0030135	coated vesicle	1945-07-01	298/19559	4.90839e-06	2.27749e-05	1.28135e-05	3127/3117/3118/3123/972/3113/3122	7
CC	GO:0031301	integral component of organelle membrane	1945-07-01	367/19559	1.8995e-05	8.30483e-05	4.67241e-05	3127/3117/3118/3123/972/3113/3122	7
CC	GO:0098791	Golgi apparatus subcompartment	1945-07-01	368/19559	1.93302e-05	8.30483e-05	4.67241e-05	3127/3117/3118/3123/972/3113/3122	7
CC	GO:0031984	organelle subcompartment	1945-07-01	392/19559	2.89728e-05	0.00012003	6.75306e-05	3127/3117/3118/3123/972/3113/3122	7
CC	GO:0031300	intrinsic component of organelle membrane	1945-07-01	398/19559	3.19199e-05	0.00012768	7.18342e-05	3127/3117/3118/3123/972/3113/3122	7
CC	GO:0030133	transport vesicle	1945-07-01	410/19559	3.85583e-05	0.000149092	8.38812e-05	3127/3117/3118/3123/972/3113/3122	7
CC	GO:0031902	late endosome membrane	1945-04-01	140/19559	0.000298334	0.00111635	0.000628072	3127/3123/3109/3122	4
CC	GO:0005770	late endosome	1945-05-01	278/19559	0.000429444	0.00155673	0.00087584	3127/3123/3109/972/3122	5
CC	GO:0005640	nuclear outer membrane	1945-02-01	28/19559	0.00188344	0.00662059	0.00372483	5743/85450	2
CC	GO:0030667	secretory granule membrane	1945-04-01	306/19559	0.00528584	0.0180341	0.0101462	3903/7305/10788/1536	4
CC	GO:0042581	specific granule	1945-03-01	160/19559	0.0059274	0.0196451	0.0110526	3903/1536/4069	3
CC	GO:0070820	tertiary granule	1945-03-01	164/19559	0.00634552	0.0204467	0.0115036	3903/1536/4069	3
CC	GO:0005775	vacuolar lumen	1945-03-01	173/19559	0.00734962	0.0230421	0.0129638	972/10437/4069	3
CC	GO:0030027	lamellipodium	1945-03-01	201/19559	0.0110517	0.0337368	0.0189808	199/10788/221472	3
CC	GO:0070821	tertiary granule membrane	1945-02-01	73/19559	0.0122637	0.0364766	0.0205223	3903/1536	2
CC	GO:0005581	collagen trimer	1945-02-01	87/19559	0.0171068	0.0496096	0.027911	712/713	2
MF	GO:0032395	MHC class II receptor activity	1944-05-01	10/18352	1.56453e-11	2.44067e-09	1.79509e-09	3117/3118/3123/3113/3122	5
MF	GO:0042605	peptide antigen binding	1944-05-01	31/18352	1.01633e-08	7.92741e-07	5.83055e-07	3127/3117/3123/3113/3122	5
MF	GO:0023026	MHC class II protein complex binding	1944-04-01	16/18352	5.12081e-08	2.66282e-06	1.95848e-06	3123/3109/972/3122	4
MF	GO:0023023	MHC protein complex binding	1944-04-01	25/18352	3.50379e-07	1.36648e-05	1.00503e-05	3123/3109/972/3122	4
MF	GO:0140375	immune receptor activity	1944-06-01	135/18352	7.95176e-07	2.48095e-05	1.82472e-05	3117/3118/3123/972/3113/3122	6
MF	GO:0042277	peptide binding	1944-07-01	308/18352	7.88154e-06	0.00020492	0.000150717	3127/712/3117/3123/972/3113/3122	7
MF	GO:0033218	amide binding	1944-07-01	381/18352	3.10908e-05	0.000692881	0.000509609	3127/712/3117/3123/972/3113/3122	7
MF	GO:0003823	antigen binding	1944-05-01	168/18352	4.92788e-05	0.000960937	0.000706762	3127/3117/3123/3113/3122	5
MF	GO:0030247	polysaccharide binding	1944-02-01	25/18352	0.00162731	0.0282068	0.0207459	3123/3122	2

## Sheet: Table S7
ONTOLOGY	ID	Description	GeneRatio	BgRatio	pvalue	p.adjust	qvalue	geneID	Count
BP	GO:0045333	cellular respiration	12/161	187/18866	7.26936e-08	0.000173738	0.000160003	126328/1329/2110/2647/4701/4717/4190/11315/4712/54949/54205/5160	12
BP	GO:0022904	respiratory electron transport chain	9/161	116/18866	6.70835e-07	0.000636154	0.000585861	126328/1329/2110/4701/4717/11315/4712/54949/54205	9
BP	GO:0015980	energy derivation by oxidation of organic compounds	13/161	278/18866	7.9852e-07	0.000636154	0.000585861	126328/1329/2110/2673/2647/4701/4717/4190/11315/4712/54949/54205/5160	13
BP	GO:0042775	mitochondrial ATP synthesis coupled electron transport	8/161	97/18866	1.79402e-06	0.000927065	0.000853773	126328/1329/4701/4717/11315/4712/54949/54205	8
BP	GO:0042773	ATP synthesis coupled electron transport	8/161	98/18866	1.93947e-06	0.000927065	0.000853773	126328/1329/4701/4717/11315/4712/54949/54205	8
BP	GO:0033233	regulation of protein sumoylation	5/161	26/18866	2.42016e-06	0.000948795	0.000873785	11315/405/10055/1958/79594	5
BP	GO:0046034	ATP metabolic process	13/161	311/18866	2.7789e-06	0.000948795	0.000873785	126328/1329/4701/4717/11315/405/4712/5208/54949/116/54205/7114/706	13
BP	GO:0035270	endocrine system development	8/161	125/18866	1.19346e-05	0.00356546	0.00328358	3670/3651/999/4821/116/3642/706/10370	8
BP	GO:0022900	electron transport chain	9/161	184/18866	2.93573e-05	0.007796	0.00717967	126328/1329/2110/4701/4717/11315/4712/54949/54205	9
BP	GO:0006119	oxidative phosphorylation	8/161	149/18866	4.2496e-05	0.0101566	0.0093536	126328/1329/4701/4717/11315/4712/54949/54205	8
BP	GO:0030073	insulin secretion	9/161	213/18866	9.13272e-05	0.0178987	0.0164837	3670/3033/3651/11315/5799/5208/57818/116/2182	9
BP	GO:0043281	regulation of cysteine-type endopeptidase activity involved in apoptotic process	9/161	215/18866	9.80741e-05	0.0178987	0.0164837	10134/6091/11315/10935/25824/10542/54205/10550/79594	9
BP	GO:0009060	aerobic respiration	6/161	87/18866	0.000100452	0.0178987	0.0164837	1329/2647/4190/54949/54205/5160	6
BP	GO:0006120	mitochondrial electron transport, NADH to ubiquinone	5/161	55/18866	0.000104846	0.0178987	0.0164837	126328/4701/4717/11315/4712	5
BP	GO:0033235	positive regulation of protein sumoylation	3/161	13/18866	0.000163839	0.026105	0.0240412	405/10055/79594	3
BP	GO:2000116	regulation of cysteine-type endopeptidase activity	9/161	239/18866	0.000217472	0.0320207	0.0294892	10134/6091/11315/10935/25824/10542/54205/10550/79594	9
BP	GO:1903320	regulation of protein modification by small protein conjugation or removal	9/161	242/18866	0.000238555	0.0320207	0.0294892	6500/23142/11315/405/85453/10055/706/1958/79594	9
BP	GO:0033108	mitochondrial respiratory chain complex assembly	6/161	102/18866	0.00024116	0.0320207	0.0294892	126328/4701/4717/28958/4712/54949	6
BP	GO:0030072	peptide hormone secretion	9/161	257/18866	0.000371121	0.0466831	0.0429924	3670/3033/3651/11315/5799/5208/57818/116/2182	9
BP	GO:0051881	regulation of mitochondrial membrane potential	5/161	74/18866	0.000426252	0.0509372	0.0469102	11315/10935/706/10550/79594	5
BP	GO:0045947	negative regulation of translational initiation	3/161	19/18866	0.000534604	0.060843	0.0560329	8637/5936/3646	3
BP	GO:0031016	pancreas development	5/161	79/18866	0.000576325	0.0626099	0.0576601	3670/3651/79971/4821/3642	5
BP	GO:0009306	protein secretion	12/161	462/18866	0.000624653	0.0633959	0.058384	3670/3033/3651/11315/79971/5799/5208/57818/4345/23208/116/2182	12
BP	GO:0035592	establishment of protein localization to extracellular region	12/161	463/18866	0.000636611	0.0633959	0.058384	3670/3033/3651/11315/79971/5799/5208/57818/4345/23208/116/2182	12
BP	GO:0016925	protein sumoylation	5/161	82/18866	0.000683584	0.0653506	0.0601842	11315/405/10055/1958/79594	5
BP	GO:0071692	protein localization to extracellular region	12/161	470/18866	0.00072583	0.0656972	0.0605034	3670/3033/3651/11315/79971/5799/5208/57818/4345/23208/116/2182	12
BP	GO:0090382	phagosome maturation	4/161	48/18866	0.000742186	0.0656972	0.0605034	535/23208/528/10981	4
BP	GO:0006085	acetyl-CoA biosynthetic process	3/161	22/18866	0.000833819	0.0711724	0.0655457	38/79717/5160	3
BP	GO:1903580	positive regulation of ATP metabolic process	4/161	50/18866	0.0008669	0.0714445	0.0657963	11315/405/5208/7114	4
BP	GO:0035384	thioester biosynthetic process	4/161	53/18866	0.00108064	0.0808308	0.0744406	38/79717/5160/2182	4
BP	GO:0071616	acyl-CoA biosynthetic process	4/161	53/18866	0.00108064	0.0808308	0.0744406	38/79717/5160/2182	4
BP	GO:0030325	adrenal gland development	3/161	24/18866	0.00108225	0.0808308	0.0744406	3642/706/10370	3
BP	GO:0045185	maintenance of protein location	5/161	93/18866	0.00120792	0.0859114	0.0791195	6500/11315/9908/7114/706	5
BP	GO:0003309	type B pancreatic cell differentiation	3/161	25/18866	0.00122217	0.0859114	0.0791195	3651/4821/3642	3
BP	GO:1904951	positive regulation of establishment of protein localization	10/161	370/18866	0.001318	0.088757	0.0817401	3670/10134/3651/79971/51128/5208/999/22948/2182/10055	10
BP	GO:1903322	positive regulation of protein modification by small protein conjugation or removal	6/161	141/18866	0.00133693	0.088757	0.0817401	6500/23142/405/85453/10055/79594	6
BP	GO:0048732	gland development	11/161	443/18866	0.0015051	0.0953476	0.0878097	3670/6091/38/3651/79971/999/440/116/3642/706/10370	11
BP	GO:0046879	hormone secretion	9/161	314/18866	0.00153302	0.0953476	0.0878097	3670/3033/3651/11315/5799/5208/57818/116/2182	9
BP	GO:0006626	protein targeting to mitochondrion	5/161	99/18866	0.00159578	0.0953476	0.0878097	401505/26517/10245/10055/706	5
BP	GO:0090277	positive regulation of peptide hormone secretion	5/161	99/18866	0.00159578	0.0953476	0.0878097	3670/3651/5208/116/2182	5
BP	GO:0002791	regulation of peptide secretion	10/161	381/18866	0.00163742	0.0954495	0.0879035	3670/3033/3651/79971/5208/57818/4345/23208/116/2182	10
BP	GO:0035883	enteroendocrine cell differentiation	3/161	28/18866	0.00170848	0.0955094	0.0879587	3651/4821/3642	3
BP	GO:0043388	positive regulation of DNA binding	4/161	60/18866	0.00171837	0.0955094	0.0879587	3670/3651/11315/10542	4
BP	GO:0009914	hormone transport	9/161	323/18866	0.00185923	0.10099	0.0930062	3670/3033/3651/11315/5799/5208/57818/116/2182	9
BP	GO:0032507	maintenance of protein location in cell	4/161	64/18866	0.00218078	0.115466	0.106338	6500/11315/7114/706	4
BP	GO:0010257	NADH dehydrogenase complex assembly	4/161	65/18866	0.00230854	0.115466	0.106338	126328/4701/4717/4712	4
BP	GO:0032981	mitochondrial respiratory chain complex I assembly	4/161	65/18866	0.00230854	0.115466	0.106338	126328/4701/4717/4712	4
BP	GO:0006839	mitochondrial transport	8/161	271/18866	0.00231898	0.115466	0.106338	401505/1329/26517/81853/10245/10055/706/79594	8
BP	GO:0090276	regulation of peptide hormone secretion	7/161	213/18866	0.00238644	0.1164	0.107197	3670/3033/3651/5208/57818/116/2182	7
BP	GO:0033866	nucleoside bisphosphate biosynthetic process	4/161	67/18866	0.00257935	0.118551	0.109179	38/79717/5160/2182	4
BP	GO:0034030	ribonucleoside bisphosphate biosynthetic process	4/161	67/18866	0.00257935	0.118551	0.109179	38/79717/5160/2182	4
BP	GO:0034033	purine nucleoside bisphosphate biosynthetic process	4/161	67/18866	0.00257935	0.118551	0.109179	38/79717/5160/2182	4
BP	GO:0034504	protein localization to nucleus	8/161	277/18866	0.00265352	0.119659	0.110199	727851/6500/84220/11315/999/10542/22948/1871	8
BP	GO:1902369	negative regulation of RNA catabolic process	4/161	68/18866	0.0027226	0.1205	0.110974	10128/10140/1996/10949	4
BP	GO:0006099	tricarboxylic acid cycle	3/161	34/18866	0.00300616	0.130561	0.120239	4190/54949/5160	3
BP	GO:0015937	coenzyme A biosynthetic process	2/161	10/18866	0.00311379	0.130561	0.120239	38/79717	2
BP	GO:0071649	regulation of chemokine (C-C motif) ligand 5 production	2/161	10/18866	0.00311379	0.130561	0.120239	116/79594	2
BP	GO:0050708	regulation of protein secretion	9/161	352/18866	0.0033043	0.13616	0.125395	3670/3033/3651/79971/5208/57818/4345/23208/2182	9
BP	GO:0051222	positive regulation of protein transport	9/161	354/18866	0.00342968	0.138931	0.127948	3670/10134/3651/79971/51128/5208/999/2182/10055	9
BP	GO:0006635	fatty acid beta-oxidation	4/161	74/18866	0.00369803	0.14357	0.13222	3033/10455/2110/38	4
BP	GO:0032024	positive regulation of insulin secretion	4/161	74/18866	0.00369803	0.14357	0.13222	3670/3651/5208/2182	4
BP	GO:0009152	purine ribonucleotide biosynthetic process	6/161	173/18866	0.00372695	0.14357	0.13222	1329/38/79717/5160/2182/7114	6
BP	GO:0071609	chemokine (C-C motif) ligand 5 production	2/161	11/18866	0.00378448	0.14357	0.13222	116/79594	2
BP	GO:0003156	regulation of animal organ formation	3/161	38/18866	0.0041338	0.149886	0.138037	3670/6091/10370	3
BP	GO:0006084	acetyl-CoA metabolic process	3/161	38/18866	0.0041338	0.149886	0.138037	38/79717/5160	3
BP	GO:0052548	regulation of endopeptidase activity	10/161	434/18866	0.004169	0.149886	0.138037	10134/10653/6091/11315/10935/25824/10542/54205/10550/79594	10
BP	GO:0051101	regulation of DNA binding	5/161	124/18866	0.00423902	0.149886	0.138037	3670/3651/11315/10542/7114	5
BP	GO:0061418	regulation of transcription from RNA polymerase II promoter in response to hypoxia	4/161	77/18866	0.00426455	0.149886	0.138037	5689/405/1958/10370	4
BP	GO:1903578	regulation of ATP metabolic process	5/161	125/18866	0.00438584	0.150929	0.138997	11315/405/5208/7114/706	5
BP	GO:0006002	fructose 6-phosphate metabolic process	2/161	12/18866	0.00451601	0.150929	0.138997	2673/6888	2
BP	GO:0050796	regulation of insulin secretion	6/161	181/18866	0.00464303	0.150929	0.138997	3670/3033/3651/5208/57818/2182	6
BP	GO:0000422	autophagy of mitochondrion	4/161	79/18866	0.00467312	0.150929	0.138997	11315/9140/706/79594	4
BP	GO:0006446	regulation of translational initiation	4/161	79/18866	0.00467312	0.150929	0.138997	8637/5936/10289/3646	4
BP	GO:0061726	mitochondrion disassembly	4/161	79/18866	0.00467312	0.150929	0.138997	11315/9140/706/79594	4
BP	GO:1900182	positive regulation of protein localization to nucleus	4/161	80/18866	0.00488694	0.15573	0.143419	11315/999/10542/22948	4
BP	GO:0009260	ribonucleotide biosynthetic process	6/161	186/18866	0.00529395	0.159646	0.147025	1329/38/79717/5160/2182/7114	6
BP	GO:0032352	positive regulation of hormone metabolic process	2/161	13/18866	0.00530731	0.159646	0.147025	405/1958	2
BP	GO:0051481	negative regulation of cytosolic calcium ion concentration	2/161	13/18866	0.00530731	0.159646	0.147025	3777/490	2
BP	GO:1903025	regulation of RNA polymerase II regulatory region sequence-specific DNA binding	2/161	13/18866	0.00530731	0.159646	0.147025	10542/7114	2
BP	GO:0046887	positive regulation of hormone secretion	5/161	131/18866	0.00534379	0.159646	0.147025	3670/3651/5208/116/2182	5
BP	GO:0021983	pituitary gland development	3/161	42/18866	0.00548736	0.159936	0.147292	3670/999/116	3
BP	GO:0072595	maintenance of protein localization in organelle	3/161	42/18866	0.00548736	0.159936	0.147292	6500/11315/706	3
BP	GO:1903146	regulation of autophagy of mitochondrion	3/161	43/18866	0.00586242	0.167141	0.153928	11315/706/79594	3
BP	GO:0043280	positive regulation of cysteine-type endopeptidase activity involved in apoptotic process	5/161	134/18866	0.00587443	0.167141	0.153928	10134/6091/54205/10550/79594	5
BP	GO:0043154	negative regulation of cysteine-type endopeptidase activity involved in apoptotic process	4/161	85/18866	0.00605486	0.167182	0.153965	11315/10935/25824/10542	4
BP	GO:0070986	left/right axis specification	2/161	14/18866	0.00615732	0.167182	0.153965	51668/10370	2
BP	GO:0002793	positive regulation of peptide secretion	6/161	193/18866	0.0063145	0.167182	0.153965	3670/3651/79971/5208/116/2182	6
BP	GO:0046390	ribose phosphate biosynthetic process	6/161	194/18866	0.0064712	0.167182	0.153965	1329/38/79717/5160/2182/7114	6
BP	GO:0031018	endocrine pancreas development	3/161	45/18866	0.00665767	0.167182	0.153965	3651/4821/3642	3
BP	GO:0052547	regulation of peptidase activity	10/161	466/18866	0.00679293	0.167182	0.153965	10134/10653/6091/11315/10935/25824/10542/54205/10550/79594	10
BP	GO:1903312	negative regulation of mRNA metabolic process	4/161	88/18866	0.00683771	0.167182	0.153965	10140/10284/1996/10949	4
BP	GO:0006164	purine nucleotide biosynthetic process	6/161	197/18866	0.00695826	0.167182	0.153965	1329/38/79717/5160/2182/7114	6
BP	GO:0009749	response to glucose	6/161	197/18866	0.00695826	0.167182	0.153965	3480/3651/5799/5208/4821/1958	6
BP	GO:0072655	establishment of protein localization to mitochondrion	5/161	140/18866	0.00704523	0.167182	0.153965	401505/26517/10245/10055/706	5
BP	GO:0002864	regulation of acute inflammatory response to antigenic stimulus	2/161	15/18866	0.007065	0.167182	0.153965	11315/116	2
BP	GO:0006089	lactate metabolic process	2/161	15/18866	0.007065	0.167182	0.153965	11315/5208	2
BP	GO:0015936	coenzyme A metabolic process	2/161	15/18866	0.007065	0.167182	0.153965	38/79717	2
BP	GO:0018158	protein oxidation	2/161	15/18866	0.007065	0.167182	0.153965	11315/10935	2
BP	GO:0060253	negative regulation of glial cell proliferation	2/161	15/18866	0.007065	0.167182	0.153965	116/706	2
BP	GO:1904874	positive regulation of telomerase RNA localization to Cajal body	2/161	15/18866	0.007065	0.167182	0.153965	22948/10856	2
BP	GO:2000402	negative regulation of lymphocyte migration	2/161	15/18866	0.007065	0.167182	0.153965	4345/23143	2
BP	GO:0051346	negative regulation of hydrolase activity	10/161	473/18866	0.00750885	0.175943	0.162033	6272/10653/11315/10935/5799/25824/10542/116/23143/54843	10
BP	GO:0009746	response to hexose	6/161	202/18866	0.00782829	0.177276	0.163261	3480/3651/5799/5208/4821/1958	6
BP	GO:0070585	protein localization to mitochondrion	5/161	144/18866	0.00791083	0.177276	0.163261	401505/26517/10245/10055/706	5
BP	GO:0016574	histone ubiquitination	3/161	48/18866	0.00796553	0.177276	0.163261	6500/11315/84333	3
BP	GO:0042994	cytoplasmic sequestering of transcription factor	2/161	16/18866	0.00802932	0.177276	0.163261	9908/7114	2
BP	GO:0070863	positive regulation of protein exit from endoplasmic reticulum	2/161	16/18866	0.00802932	0.177276	0.163261	10134/51128	2
BP	GO:0018205	peptidyl-lysine modification	9/161	405/18866	0.00810038	0.177276	0.163261	3670/23522/2647/11315/405/10856/10055/1958/79594	9
BP	GO:0046883	regulation of hormone secretion	7/161	267/18866	0.00810607	0.177276	0.163261	3670/3033/3651/5208/57818/116/2182	7
BP	GO:2000117	negative regulation of cysteine-type endopeptidase activity	4/161	93/18866	0.00828624	0.177276	0.163261	11315/10935/25824/10542	4
BP	GO:0002067	glandular epithelial cell differentiation	3/161	49/18866	0.00843266	0.177276	0.163261	3651/4821/3642	3
BP	GO:0034260	negative regulation of GTPase activity	3/161	49/18866	0.00843266	0.177276	0.163261	5799/116/23143	3
BP	GO:1903829	positive regulation of cellular protein localization	8/161	338/18866	0.00861695	0.177276	0.163261	10134/11315/51128/999/10542/22948/23208/10055	8
BP	GO:0034284	response to monosaccharide	6/161	207/18866	0.0087742	0.177276	0.163261	3480/3651/5799/5208/4821/1958	6
BP	GO:0051047	positive regulation of secretion	8/161	340/18866	0.00891086	0.177276	0.163261	3670/3651/79971/5208/116/2182/54843/6812	8
BP	GO:0045981	positive regulation of nucleotide metabolic process	3/161	50/18866	0.00891558	0.177276	0.163261	405/5208/7114	3
BP	GO:1900544	positive regulation of purine nucleotide metabolic process	3/161	50/18866	0.00891558	0.177276	0.163261	405/5208/7114	3
BP	GO:0071456	cellular response to hypoxia	6/161	208/18866	0.00897279	0.177276	0.163261	50809/5689/3777/405/1958/10370	6
BP	GO:0072522	purine-containing compound biosynthetic process	6/161	208/18866	0.00897279	0.177276	0.163261	1329/38/79717/5160/2182/7114	6
BP	GO:0003128	heart field specification	2/161	17/18866	0.00904924	0.177276	0.163261	3670/6091	2
BP	GO:0035518	histone H2A monoubiquitination	2/161	17/18866	0.00904924	0.177276	0.163261	6500/84333	2
BP	GO:0099509	regulation of presynaptic cytosolic calcium ion concentration	2/161	17/18866	0.00904924	0.177276	0.163261	10590/490	2
BP	GO:1903311	regulation of mRNA metabolic process	8/161	344/18866	0.00952114	0.183532	0.169023	22894/10140/5689/84081/5936/10284/1996/10949	8
BP	GO:0051224	negative regulation of protein transport	5/161	151/18866	0.00959898	0.183532	0.169023	3033/11315/4345/23208/6248	5
BP	GO:2001056	positive regulation of cysteine-type endopeptidase activity	5/161	151/18866	0.00959898	0.183532	0.169023	10134/6091/54205/10550/79594	5
BP	GO:0016311	dephosphorylation	10/161	492/18866	0.00974831	0.184701	0.170099	5799/5208/57818/54949/78986/54205/55291/23075/5787/54843	10
BP	GO:2000677	regulation of transcription regulatory region DNA binding	3/161	52/18866	0.00992922	0.184701	0.170099	11315/10542/7114	3
BP	GO:0043031	negative regulation of macrophage activation	2/161	18/18866	0.0101238	0.184701	0.170099	4345/23208	2
BP	GO:0046885	regulation of hormone biosynthetic process	2/161	18/18866	0.0101238	0.184701	0.170099	405/1958	2
BP	GO:1904872	regulation of telomerase RNA localization to Cajal body	2/161	18/18866	0.0101238	0.184701	0.170099	22948/10856	2
BP	GO:2000369	regulation of clathrin-dependent endocytosis	2/161	18/18866	0.0101238	0.184701	0.170099	6456/23208	2
BP	GO:1904950	negative regulation of establishment of protein localization	5/161	155/18866	0.0106674	0.192086	0.1769	3033/11315/4345/23208/6248	5
BP	GO:0032868	response to insulin	7/161	283/18866	0.0109423	0.192086	0.1769	3033/6272/3480/535/490/528/1958	7
BP	GO:0051438	regulation of ubiquitin-protein transferase activity	3/161	54/18866	0.0110072	0.192086	0.1769	6500/23142/11315	3
BP	GO:0036294	cellular response to decreased oxygen levels	6/161	218/18866	0.0111392	0.192086	0.1769	50809/5689/3777/405/1958/10370	6
BP	GO:0090670	RNA localization to Cajal body	2/161	19/18866	0.0112519	0.192086	0.1769	22948/10856	2
BP	GO:0090671	telomerase RNA localization to Cajal body	2/161	19/18866	0.0112519	0.192086	0.1769	22948/10856	2
BP	GO:0090672	telomerase RNA localization	2/161	19/18866	0.0112519	0.192086	0.1769	22948/10856	2
BP	GO:0090685	RNA localization to nucleus	2/161	19/18866	0.0112519	0.192086	0.1769	22948/10856	2
BP	GO:0150079	negative regulation of neuroinflammatory response	2/161	19/18866	0.0112519	0.192086	0.1769	4345/23208	2
BP	GO:0035065	regulation of histone acetylation	3/161	55/18866	0.0115706	0.196126	0.180621	3670/11315/10856	3
BP	GO:1902600	proton transmembrane transport	5/161	159/18866	0.0118145	0.198849	0.183128	1329/11315/535/528/7114	5
CC	GO:0005758	mitochondrial intermembrane space	5/165	80/19559	0.000580422	0.0538894	0.0452414	2647/26517/11315/84269/54205	5
CC	GO:0005759	mitochondrial matrix	12/165	473/19559	0.000697726	0.0538894	0.0452414	3033/10128/2110/38/2647/4701/11315/10935/25824/54949/5160/64745	12
CC	GO:0005747	mitochondrial respiratory chain complex I	4/165	50/19559	0.000831321	0.0538894	0.0452414	126328/4701/4717/4712	4
CC	GO:0030964	NADH dehydrogenase complex	4/165	50/19559	0.000831321	0.0538894	0.0452414	126328/4701/4717/4712	4
CC	GO:0045271	respiratory chain complex I	4/165	50/19559	0.000831321	0.0538894	0.0452414	126328/4701/4717/4712	4
CC	GO:0031970	organelle envelope lumen	5/165	90/19559	0.00099183	0.0538894	0.0452414	2647/26517/11315/84269/54205	5
CC	GO:0043195	terminal bouton	4/165	56/19559	0.00127488	0.059373	0.0498449	10590/5799/23208/116	4
CC	GO:0070469	respirasome	5/165	101/19559	0.00165983	0.0606143	0.0508871	126328/4701/4717/4712/54205	5
CC	GO:0098798	mitochondrial protein complex	8/165	265/19559	0.00188413	0.0606143	0.0508871	126328/401505/26517/4701/4717/4712/5160/10245	8
CC	GO:0048787	presynaptic active zone membrane	3/165	31/19559	0.0022278	0.0606143	0.0508871	490/23208/6812	3
CC	GO:1990204	oxidoreductase complex	5/165	110/19559	0.00241408	0.0606143	0.0508871	126328/4701/4717/4712/5160	5
CC	GO:0031968	organelle outer membrane	7/165	218/19559	0.00255351	0.0606143	0.0508871	401505/10128/7419/10981/2182/706/79594	7
CC	GO:0030133	transport vesicle	10/165	410/19559	0.00257731	0.0606143	0.0508871	6272/10590/117177/51128/10567/5799/6456/23208/9522/54843	10
CC	GO:0019867	outer membrane	7/165	220/19559	0.00268682	0.0606143	0.0508871	401505/10128/7419/10981/2182/706/79594	7
CC	GO:0070382	exocytic vesicle	7/165	223/19559	0.00289674	0.0606143	0.0508871	117177/10567/5799/6456/23208/9522/54843	7
CC	GO:0005743	mitochondrial inner membrane	11/165	489/19559	0.00297494	0.0606143	0.0508871	126328/1329/2110/26517/4701/4717/28958/4712/81853/54205/10245	11
CC	GO:0098791	Golgi apparatus subcompartment	9/165	368/19559	0.00411007	0.0788167	0.0661684	10134/6272/79971/51128/999/23208/9522/10040/10981	9
CC	GO:0032592	integral component of mitochondrial membrane	4/165	81/19559	0.00490841	0.0866479	0.0727428	2110/28958/10245/79594	4
CC	GO:0098573	intrinsic component of mitochondrial membrane	4/165	82/19559	0.00512679	0.0866479	0.0727428	2110/28958/10245/79594	4
CC	GO:0098803	respiratory chain complex	4/165	85/19559	0.00582079	0.0866479	0.0727428	126328/4701/4717/4712	4
CC	GO:0005741	mitochondrial outer membrane	6/165	192/19559	0.00584152	0.0866479	0.0727428	401505/7419/10981/2182/706/79594	6
CC	GO:0031984	organelle subcompartment	9/165	392/19559	0.00616072	0.0866479	0.0727428	10134/6272/79971/51128/999/23208/9522/10040/10981	9
CC	GO:0098800	inner mitochondrial membrane protein complex	5/165	138/19559	0.00633714	0.0866479	0.0727428	126328/4701/4717/4712/10245	5
CC	GO:0045335	phagocytic vesicle	5/165	140/19559	0.00672656	0.0866479	0.0727428	9140/535/23208/10981/6812	5
CC	GO:0005746	mitochondrial respirasome	4/165	89/19559	0.00683978	0.0866479	0.0727428	126328/4701/4717/4712	4
CC	GO:0099059	integral component of presynaptic active zone membrane	2/165	15/19559	0.00691057	0.0866479	0.0727428	490/23208	2
CC	GO:0000176	nuclear exosome (RNase complex)	2/165	16/19559	0.00785429	0.0914463	0.0767712	22894/10200	2
CC	GO:0044233	mitochondria-associated endoplasmic reticulum membrane	2/165	16/19559	0.00785429	0.0914463	0.0767712	10981/2182	2
CC	GO:0031304	intrinsic component of mitochondrial inner membrane	3/165	50/19559	0.00864406	0.0930943	0.0781547	2110/28958/10245	3
CC	GO:0031305	integral component of mitochondrial inner membrane	3/165	50/19559	0.00864406	0.0930943	0.0781547	2110/28958/10245	3
CC	GO:0016282	eukaryotic 43S preinitiation complex	2/165	17/19559	0.00885252	0.0930943	0.0781547	10289/3646	2
CC	GO:0016471	vacuolar proton-transporting V-type ATPase complex	2/165	18/19559	0.00990431	0.0978425	0.082141	535/528	2
CC	GO:0070993	translation preinitiation complex	2/165	18/19559	0.00990431	0.0978425	0.082141	10289/3646	2
CC	GO:0098945	intrinsic component of presynaptic active zone membrane	2/165	19/19559	0.0110087	0.105554	0.0886147	490/23208	2
CC	GO:0030666	endocytic vesicle membrane	5/165	164/19559	0.0127802	0.119039	0.0999357	79971/9140/535/6456/10981	5
CC	GO:0101003	ficolin-1-rich granule membrane	3/165	61/19559	0.0148416	0.134399	0.112831	5799/535/6515	3
CC	GO:0030139	endocytic vesicle	7/165	313/19559	0.0171334	0.148298	0.1245	79971/9140/535/6456/23208/10981/6812	7
CC	GO:0000178	exosome (RNase complex)	2/165	24/19559	0.0172863	0.148298	0.1245	22894/10200	2
CC	GO:1905354	exoribonuclease complex	2/165	25/19559	0.0186866	0.156201	0.131134	22894/10200	2
CC	GO:0001725	stress fiber	3/165	68/19559	0.0198056	0.157478	0.132207	23002/7170/29109	3
CC	GO:0097517	contractile actin filament bundle	3/165	68/19559	0.0198056	0.157478	0.132207	23002/7170/29109	3
CC	GO:0033176	proton-transporting V-type ATPase complex	2/165	27/19559	0.0216249	0.163947	0.137637	535/528	2
CC	GO:0044232	organelle membrane contact site	2/165	27/19559	0.0216249	0.163947	0.137637	10981/2182	2
CC	GO:0043679	axon terminus	4/165	130/19559	0.0244473	0.174979	0.146898	10590/5799/23208/116	4
CC	GO:0030136	clathrin-coated vesicle	5/165	194/19559	0.0244998	0.174979	0.146898	10134/6272/6456/23208/9522	5
CC	GO:0010494	cytoplasmic stress granule	3/165	74/19559	0.0247027	0.174979	0.146898	26065/5936/9908	3
CC	GO:0017053	transcription repressor complex	3/165	76/19559	0.0264671	0.174979	0.146898	57708/3642/54815	3
CC	GO:0032432	actin filament bundle	3/165	76/19559	0.0264671	0.174979	0.146898	23002/7170/29109	3
CC	GO:0048786	presynaptic active zone	3/165	76/19559	0.0264671	0.174979	0.146898	490/23208/6812	3
CC	GO:0000118	histone deacetylase complex	3/165	77/19559	0.0273739	0.174979	0.146898	10284/10856/54815	3
CC	GO:0030670	phagocytic vesicle membrane	3/165	77/19559	0.0273739	0.174979	0.146898	9140/535/10981	3
CC	GO:0005777	peroxisome	4/165	137/19559	0.0289053	0.176505	0.14818	10455/25824/2182/79594	4
CC	GO:0042579	microbody	4/165	137/19559	0.0289053	0.176505	0.14818	10455/25824/2182/79594	4
CC	GO:0042641	actomyosin	3/165	79/19559	0.029237	0.176505	0.14818	23002/7170/29109	3
CC	GO:0008021	synaptic vesicle	5/165	205/19559	0.0301046	0.178438	0.149803	10567/5799/6456/23208/9522	5
CC	GO:0030658	transport vesicle membrane	5/165	209/19559	0.0323273	0.188191	0.15799	10590/51128/5799/6456/9522	5
MF	GO:0048487	beta-tubulin binding	4/162	37/18352	0.000307914	0.120086	0.112794	10128/6902/22948/23208	4

## Sheet: Table S8
ONTOLOGY	ID	Description	GeneRatio	BgRatio	pvalue	p.adjust	qvalue	geneID	Count
BP	GO:0045576	mast cell activation	11/111	61/18866	5.76016e-14	1.37899e-10	1.05787e-10	11314/2207/3937/695/2624/3815/5880/8832/4067/27040/3566	11
BP	GO:0043303	mast cell degranulation	10/111	47/18866	1.41864e-13	1.37899e-10	1.05787e-10	11314/2207/695/2624/3815/5880/8832/4067/27040/3566	10
BP	GO:0002279	mast cell activation involved in immune response	10/111	48/18866	1.78324e-13	1.37899e-10	1.05787e-10	11314/2207/695/2624/3815/5880/8832/4067/27040/3566	10
BP	GO:0002448	mast cell mediated immunity	10/111	49/18866	2.22957e-13	1.37899e-10	1.05787e-10	11314/2207/695/2624/3815/5880/8832/4067/27040/3566	10
BP	GO:0042110	T cell activation	21/111	483/18866	6.72039e-13	3.32525e-10	2.55092e-10	11314/5788/2207/54440/8809/3936/3955/3815/301/3956/5880/54900/4067/5777/3958/3718/5914/27040/960/3566/6441	21
BP	GO:0007159	leukocyte cell-cell adhesion	18/111	364/18866	4.20408e-12	1.73348e-09	1.32982e-09	11314/5788/54440/5724/301/3956/5880/54900/4067/5777/3958/3718/240/5914/10318/960/3566/6441	18
BP	GO:0050866	negative regulation of cell activation	14/111	207/18866	1.94574e-11	6.12568e-09	4.69923e-09	11314/5788/695/301/64092/54900/8832/4067/5777/3958/3718/928/3566/6441	14
BP	GO:0032418	lysosome localization	10/111	75/18866	1.98082e-11	6.12568e-09	4.69923e-09	11314/2207/695/2624/3815/5880/8832/4067/27040/3566	10
BP	GO:0002703	regulation of leukocyte mediated immunity	14/111	211/18866	2.51669e-11	6.91811e-09	5.30713e-09	11314/5788/2207/54440/8809/695/2624/5724/5880/8832/4067/5777/3718/3566	14
BP	GO:0002886	regulation of myeloid leukocyte mediated immunity	9/111	58/18866	5.08726e-11	1.17264e-08	8.99576e-09	11314/2207/695/2624/5724/5880/8832/4067/3566	9
BP	GO:0002699	positive regulation of immune effector process	14/111	223/18866	5.27761e-11	1.17264e-08	8.99576e-09	11314/5788/2207/54440/8809/695/2624/5724/301/5880/8832/4067/5914/3566	14
BP	GO:0043312	neutrophil degranulation	19/111	487/18866	6.13472e-11	1.17264e-08	8.99576e-09	11314/5788/2207/9535/51411/963/5724/3687/5023/79930/1535/11240/83716/5777/3958/240/391/6282/960	19
BP	GO:0002695	negative regulation of leukocyte activation	13/111	184/18866	6.16182e-11	1.17264e-08	8.99576e-09	11314/5788/695/301/64092/54900/8832/4067/5777/3958/3718/3566/6441	13
BP	GO:0002283	neutrophil activation involved in immune response	19/111	490/18866	6.81183e-11	1.20375e-08	9.23438e-09	11314/5788/2207/9535/51411/963/5724/3687/5023/79930/1535/11240/83716/5777/3958/240/391/6282/960	19
BP	GO:1903037	regulation of leukocyte cell-cell adhesion	16/111	329/18866	9.28904e-11	1.53207e-08	1.17531e-08	11314/5788/54440/5724/301/3956/54900/4067/5777/3958/3718/240/5914/960/3566/6441	16
BP	GO:0002683	negative regulation of immune system process	18/111	463/18866	2.18847e-10	3.38392e-08	2.59593e-08	11314/5788/2207/695/2624/301/64092/11240/54900/8832/4067/5777/3958/7538/3718/5914/3566/6441	18
BP	GO:0043300	regulation of leukocyte degranulation	8/111	47/18866	2.88959e-10	4.20521e-08	3.22596e-08	11314/2207/2624/5724/5880/8832/4067/3566	8
BP	GO:0043304	regulation of mast cell degranulation	7/111	32/18866	6.00852e-10	8.25838e-08	6.3353e-08	11314/2207/2624/5880/8832/4067/3566	7
BP	GO:0033006	regulation of mast cell activation involved in immune response	7/111	33/18866	7.58943e-10	9.58968e-08	7.35659e-08	11314/2207/2624/5880/8832/4067/3566	7
BP	GO:0022407	regulation of cell-cell adhesion	17/111	439/18866	7.75237e-10	9.58968e-08	7.35659e-08	11314/5788/54440/5724/301/3956/54900/4067/5777/3958/3718/928/240/5914/960/3566/6441	17
BP	GO:0050863	regulation of T cell activation	15/111	332/18866	1.0382e-09	1.19105e-07	9.137e-08	11314/5788/54440/301/3956/5880/54900/4067/5777/3958/3718/5914/27040/3566/6441	15
BP	GO:0002285	lymphocyte activation involved in immune response	12/111	187/18866	1.05914e-09	1.19105e-07	9.137e-08	5788/2207/8809/4242/3936/3955/301/3956/3958/3718/5914/3566	12
BP	GO:0051250	negative regulation of lymphocyte activation	11/111	154/18866	1.75746e-09	1.89042e-07	1.45021e-07	11314/695/301/64092/54900/4067/5777/3958/3718/3566/6441	11
BP	GO:0002697	regulation of immune effector process	17/111	470/18866	2.17664e-09	2.24375e-07	1.72126e-07	11314/5788/2207/54440/8809/695/2624/5724/301/5880/8832/4067/5777/3958/3718/5914/3566	17
BP	GO:0002819	regulation of adaptive immune response	11/111	168/18866	4.4095e-09	4.36364e-07	3.34751e-07	5788/2207/54440/962/8809/695/301/64092/5777/3718/3566	11
BP	GO:0033003	regulation of mast cell activation	7/111	44/18866	6.45535e-09	6.14252e-07	4.71215e-07	11314/2207/2624/5880/8832/4067/3566	7
BP	GO:0042113	B cell activation	14/111	328/18866	8.05575e-09	7.38145e-07	5.66258e-07	11314/5788/5579/54440/695/4242/3955/3815/3956/64092/54900/4067/5777/3718	14
BP	GO:1903039	positive regulation of leukocyte cell-cell adhesion	12/111	235/18866	1.4013e-08	1.23815e-06	9.49826e-07	5788/54440/5724/301/3956/4067/5777/3718/240/5914/960/3566	12
BP	GO:0032680	regulation of tumor necrosis factor production	9/111	110/18866	1.72117e-08	1.46834e-06	1.12642e-06	5788/2207/54440/5724/1535/5777/7538/5914/8737	9
BP	GO:1903555	regulation of tumor necrosis factor superfamily cytokine production	9/111	113/18866	2.18081e-08	1.79844e-06	1.37965e-06	5788/2207/54440/5724/1535/5777/7538/5914/8737	9
BP	GO:0032640	tumor necrosis factor production	9/111	116/18866	2.74438e-08	2.19019e-06	1.68017e-06	5788/2207/54440/5724/1535/5777/7538/5914/8737	9
BP	GO:0045785	positive regulation of cell adhesion	15/111	428/18866	3.16848e-08	2.42545e-06	1.86065e-06	5788/54440/5724/301/3956/80005/4067/5777/3718/240/5914/1399/960/3566/8829	15
BP	GO:0050777	negative regulation of immune response	10/111	159/18866	3.37996e-08	2.42545e-06	1.86065e-06	11314/5788/301/64092/8832/4067/5777/3958/3718/3566	10
BP	GO:0030098	lymphocyte differentiation	14/111	368/18866	3.42642e-08	2.42545e-06	1.86065e-06	5788/2207/54440/8809/695/4242/3955/3815/301/3956/5777/3718/5914/3566	14
BP	GO:0071706	tumor necrosis factor superfamily cytokine production	9/111	119/18866	3.43131e-08	2.42545e-06	1.86065e-06	5788/2207/54440/5724/1535/5777/7538/5914/8737	9
BP	GO:0060326	cell chemotaxis	13/111	311/18866	3.65334e-08	2.51066e-06	1.92602e-06	2207/51411/3815/301/5880/11240/4067/3958/240/391/1399/8829/6441	13
BP	GO:1903305	regulation of regulated secretory pathway	10/111	162/18866	4.03734e-08	2.69956e-06	2.07093e-06	11314/5579/2207/2624/5724/5023/5880/8832/4067/3566	10
BP	GO:0006909	phagocytosis	14/111	382/18866	5.44944e-08	3.54787e-06	2.7217e-06	4689/11314/5788/2207/2624/51411/301/1535/5880/4615/4067/391/5914/6441	14
BP	GO:0050670	regulation of lymphocyte proliferation	11/111	219/18866	6.8718e-08	4.35919e-06	3.34409e-06	11314/5788/54440/695/301/5880/4067/5777/3958/3718/6441	11
BP	GO:0032944	regulation of mononuclear cell proliferation	11/111	221/18866	7.53835e-08	4.66247e-06	3.57675e-06	11314/5788/54440/695/301/5880/4067/5777/3958/3718/6441	11
BP	GO:0017157	regulation of exocytosis	11/111	222/18866	7.89269e-08	4.76257e-06	3.65354e-06	11314/5579/2207/2624/5724/301/5023/5880/8832/4067/3566	11
BP	GO:0022409	positive regulation of cell-cell adhesion	12/111	279/18866	9.28018e-08	5.46647e-06	4.19352e-06	5788/54440/5724/301/3956/4067/5777/3718/240/5914/960/3566	12
BP	GO:0050854	regulation of antigen receptor-mediated signaling pathway	7/111	69/18866	1.61077e-07	9.26755e-06	7.10947e-06	11314/5788/5579/4067/5777/123920/3958	7
BP	GO:0070663	regulation of leukocyte proliferation	11/111	240/18866	1.73698e-07	9.76654e-06	7.49227e-06	11314/5788/54440/695/301/5880/4067/5777/3958/3718/6441	11
BP	GO:0007162	negative regulation of cell adhesion	12/111	301/18866	2.10947e-07	1.15974e-05	8.8968e-06	11314/5788/397/301/3956/54900/5777/3958/3718/928/3566/6441	12
BP	GO:0071887	leukocyte apoptotic process	8/111	108/18866	2.40467e-07	1.29329e-05	9.92132e-06	2207/695/301/4067/3958/3718/1399/8737	8
BP	GO:0002286	T cell activation involved in immune response	8/111	109/18866	2.58256e-07	1.35941e-05	1.04286e-05	2207/8809/3936/301/3958/3718/5914/3566	8
BP	GO:0002822	regulation of adaptive immune response based on somatic recombination of immune receptors built from immunoglobulin superfamily domains	9/111	153/18866	2.99387e-07	1.54309e-05	1.18376e-05	5788/2207/54440/8809/695/301/5777/3718/3566	9
BP	GO:0070661	leukocyte proliferation	12/111	313/18866	3.20778e-07	1.6196e-05	1.24246e-05	11314/5788/54440/695/3815/301/5880/4067/5777/3958/3718/6441	12
BP	GO:0032760	positive regulation of tumor necrosis factor production	6/111	50/18866	4.6598e-07	2.27868e-05	1.74806e-05	5788/2207/54440/5724/1535/8737	6
BP	GO:0050868	negative regulation of T cell activation	8/111	118/18866	4.76002e-07	2.27868e-05	1.74806e-05	11314/301/54900/5777/3958/3718/3566/6441	8
BP	GO:0050851	antigen receptor-mediated signaling pathway	12/111	325/18866	4.78946e-07	2.27868e-05	1.74806e-05	11314/5788/5579/3937/695/54900/4067/5777/123920/3958/1399/27040	12
BP	GO:0002685	regulation of leukocyte migration	10/111	212/18866	4.98533e-07	2.32711e-05	1.78521e-05	11314/5724/301/5880/11240/4067/3958/928/391/1399	10
BP	GO:1903557	positive regulation of tumor necrosis factor superfamily cytokine production	6/111	52/18866	5.91324e-07	2.70914e-05	2.07828e-05	5788/2207/54440/5724/1535/8737	6
BP	GO:0002698	negative regulation of immune effector process	8/111	124/18866	6.95778e-07	3.12973e-05	2.40093e-05	11314/5788/301/8832/5777/3958/3718/3566	8
BP	GO:0032623	interleukin-2 production	6/111	54/18866	7.4304e-07	3.28265e-05	2.51824e-05	5788/2207/54440/301/7538/6441	6
BP	GO:0097529	myeloid leukocyte migration	10/111	222/18866	7.60196e-07	3.29952e-05	2.53118e-05	11314/2207/3815/301/5880/4067/3958/928/391/6441	10
BP	GO:0002696	positive regulation of leukocyte activation	13/111	406/18866	7.80984e-07	3.3313e-05	2.55556e-05	5788/2207/54440/695/2624/5724/301/3956/4067/5777/3718/5914/3566	13
BP	GO:0046651	lymphocyte proliferation	11/111	283/18866	8.94123e-07	3.74926e-05	2.87619e-05	11314/5788/54440/695/301/5880/4067/5777/3958/3718/6441	11
BP	GO:0032943	mononuclear cell proliferation	11/111	286/18866	9.91545e-07	4.08847e-05	3.13641e-05	11314/5788/54440/695/301/5880/4067/5777/3958/3718/6441	11
BP	GO:1902105	regulation of leukocyte differentiation	11/111	290/18866	1.13593e-06	4.60705e-05	3.53424e-05	5788/54440/695/2624/301/4067/5777/3718/5914/8737/3566	11
BP	GO:0050867	positive regulation of cell activation	13/111	421/18866	1.17144e-06	4.67443e-05	3.58593e-05	5788/2207/54440/695/2624/5724/301/3956/4067/5777/3718/5914/3566	13
BP	GO:0002532	production of molecular mediator involved in inflammatory response	7/111	93/18866	1.25972e-06	4.94692e-05	3.79496e-05	2207/695/5023/4615/4067/240/3566	7
BP	GO:1903706	regulation of hemopoiesis	14/111	498/18866	1.34334e-06	5.19286e-05	3.98363e-05	5788/5579/54440/695/2624/301/4067/5777/3958/7538/3718/5914/8737/3566	14
BP	GO:0030183	B cell differentiation	8/111	137/18866	1.48293e-06	5.55874e-05	4.26431e-05	5788/695/4242/3955/3815/3956/5777/3718	8
BP	GO:1903038	negative regulation of leukocyte cell-cell adhesion	8/111	137/18866	1.48293e-06	5.55874e-05	4.26431e-05	11314/301/54900/5777/3958/3718/3566/6441	8
BP	GO:0030099	myeloid cell differentiation	13/111	431/18866	1.52044e-06	5.61427e-05	4.30691e-05	5579/2207/2624/2313/3815/4067/5777/3958/7538/3718/5914/5305/8737	13
BP	GO:0002888	positive regulation of myeloid leukocyte mediated immunity	5/111	34/18866	1.56378e-06	5.61692e-05	4.30894e-05	2207/695/2624/5724/3566	5
BP	GO:0002705	positive regulation of leukocyte mediated immunity	8/111	138/18866	1.56656e-06	5.61692e-05	4.30894e-05	5788/2207/54440/8809/695/2624/5724/3566	8
BP	GO:0046634	regulation of alpha-beta T cell activation	7/111	97/18866	1.67555e-06	5.92187e-05	4.54288e-05	11314/5788/54440/301/3718/5914/3566	7
BP	GO:0022408	negative regulation of cell-cell adhesion	9/111	191/18866	1.92253e-06	6.69908e-05	5.13911e-05	11314/301/54900/5777/3958/3718/928/3566/6441	9
BP	GO:0046631	alpha-beta T cell activation	8/111	146/18866	2.39262e-06	8.2213e-05	6.30686e-05	11314/5788/54440/8809/301/3718/5914/3566	8
BP	GO:0030217	T cell differentiation	10/111	253/18866	2.47693e-06	8.39441e-05	6.43965e-05	5788/2207/54440/8809/3955/3815/301/3718/5914/3566	10
BP	GO:0035855	megakaryocyte development	4/111	17/18866	2.54627e-06	8.51279e-05	6.53047e-05	2313/3815/5777/5305	4
BP	GO:0002224	toll-like receptor signaling pathway	8/111	152/18866	3.23259e-06	0.000106633	8.18017e-05	11314/695/1535/4615/4067/10318/8737/6441	8
BP	GO:0002292	T cell differentiation involved in immune response	6/111	71/18866	3.79955e-06	0.000123685	9.48836e-05	2207/8809/301/3718/5914/3566	6
BP	GO:0045063	T-helper 1 cell differentiation	4/111	19/18866	4.1093e-06	0.000132031	0.000101286	8809/301/3718/3566	4
BP	GO:0070227	lymphocyte apoptotic process	6/111	73/18866	4.47332e-06	0.000141884	0.000108845	695/4067/3958/3718/1399/8737	6
BP	GO:0050870	positive regulation of T cell activation	9/111	214/18866	4.88269e-06	0.000152908	0.000117302	5788/54440/301/3956/4067/5777/3718/5914/3566	9
BP	GO:0002429	immune response-activating cell surface receptor signaling pathway	13/111	481/18866	5.05772e-06	0.000154479	0.000118506	11314/5788/5579/2207/3937/695/54900/4067/5777/123920/3958/1399/27040	13
BP	GO:0002757	immune response-activating signal transduction	13/111	481/18866	5.05772e-06	0.000154479	0.000118506	11314/5788/5579/2207/3937/695/54900/4067/5777/123920/3958/1399/27040	13
BP	GO:0042129	regulation of T cell proliferation	8/111	167/18866	6.49136e-06	0.000195849	0.000150243	5788/54440/301/5880/5777/3958/3718/6441	8
BP	GO:0043367	CD4-positive, alpha-beta T cell differentiation	6/111	78/18866	6.59066e-06	0.000196449	0.000150703	54440/8809/301/3718/5914/3566	6
BP	GO:0002820	negative regulation of adaptive immune response	5/111	48/18866	9.01288e-06	0.000262328	0.000201241	5788/64092/5777/3718/3566	5
BP	GO:0043370	regulation of CD4-positive, alpha-beta T cell differentiation	5/111	48/18866	9.01288e-06	0.000262328	0.000201241	54440/301/3718/5914/3566	5
BP	GO:0030595	leukocyte chemotaxis	9/111	232/18866	9.37661e-06	0.000269741	0.000206928	2207/3815/301/5880/11240/4067/3958/240/6441	9
BP	GO:0032663	regulation of interleukin-2 production	5/111	49/18866	9.99025e-06	0.000284091	0.000217936	5788/54440/301/7538/6441	5
BP	GO:2000106	regulation of leukocyte apoptotic process	6/111	86/18866	1.16129e-05	0.000325343	0.000249582	2207/695/301/4067/3958/3718	6
BP	GO:0045619	regulation of lymphocyte differentiation	8/111	181/18866	1.17039e-05	0.000325343	0.000249582	5788/54440/695/301/5777/3718/5914/3566	8
BP	GO:0043302	positive regulation of leukocyte degranulation	4/111	25/18866	1.30513e-05	0.000358765	0.000275222	2207/2624/5724/3566	4
BP	GO:0002704	negative regulation of leukocyte mediated immunity	5/111	52/18866	1.34264e-05	0.000365022	0.000280022	11314/5788/8832/5777/3718	5
BP	GO:0050853	B cell receptor signaling pathway	7/111	135/18866	1.50346e-05	0.0004043	0.000310153	11314/5788/5579/695/4067/5777/123920	7
BP	GO:0002825	regulation of T-helper 1 type immune response	4/111	27/18866	1.79433e-05	0.000477329	0.000366176	8809/301/3718/3566	4
BP	GO:0042098	T cell proliferation	8/111	195/18866	2.00745e-05	0.000528345	0.000405312	5788/54440/301/5880/5777/3958/3718/6441	8
BP	GO:0048872	homeostasis of number of cells	9/111	256/18866	2.05352e-05	0.00053478	0.000410249	2207/54440/2624/3815/301/4067/7538/3718/27040	9
BP	GO:0002700	regulation of production of molecular mediator of immune response	7/111	144/18866	2.28473e-05	0.000578841	0.00044405	5788/2207/54440/8809/695/3718/3566	7
BP	GO:0045625	regulation of T-helper 1 cell differentiation	3/111	10/18866	2.30824e-05	0.000578841	0.00044405	301/3718/3566	3
BP	GO:0035710	CD4-positive, alpha-beta T cell activation	6/111	97/18866	2.3163e-05	0.000578841	0.00044405	54440/8809/301/3718/5914/3566	6
BP	GO:0050764	regulation of phagocytosis	6/111	97/18866	2.3163e-05	0.000578841	0.00044405	11314/5788/2207/2624/1535/6441	6
BP	GO:0050855	regulation of B cell receptor signaling pathway	4/111	29/18866	2.40641e-05	0.000595345	0.000456711	11314/5579/4067/123920	4
BP	GO:0002221	pattern recognition receptor signaling pathway	8/111	201/18866	2.49581e-05	0.00061135	0.000468989	11314/695/1535/4615/4067/10318/8737/6441	8
BP	GO:0042093	T-helper cell differentiation	5/111	60/18866	2.71795e-05	0.000653868	0.000501606	8809/301/3718/5914/3566	5
BP	GO:0043547	positive regulation of GTPase activity	11/111	406/18866	2.75722e-05	0.000653868	0.000501606	6001/5996/397/9459/26230/117289/80005/391/6000/1399/8829	11
BP	GO:0043372	positive regulation of CD4-positive, alpha-beta T cell differentiation	4/111	30/18866	2.76407e-05	0.000653868	0.000501606	54440/301/5914/3566	4
BP	GO:1903708	positive regulation of hemopoiesis	8/111	204/18866	2.77511e-05	0.000653868	0.000501606	5788/54440/695/2624/301/5914/8737/3566	8
BP	GO:0001820	serotonin secretion	3/111	11/18866	3.16022e-05	0.00072413	0.000555506	2207/4129/5023	3
BP	GO:0045628	regulation of T-helper 2 cell differentiation	3/111	11/18866	3.16022e-05	0.00072413	0.000555506	301/5914/3566	3
BP	GO:0002294	CD4-positive, alpha-beta T cell differentiation involved in immune response	5/111	62/18866	3.19039e-05	0.00072413	0.000555506	8809/301/3718/5914/3566	5
BP	GO:0030888	regulation of B cell proliferation	5/111	62/18866	3.19039e-05	0.00072413	0.000555506	11314/5788/54440/695/4067	5
BP	GO:0002367	cytokine production involved in immune response	6/111	104/18866	3.44029e-05	0.000748554	0.000574243	2207/54440/8809/695/3815/3718	6
BP	GO:0002287	alpha-beta T cell activation involved in immune response	5/111	63/18866	3.44928e-05	0.000748554	0.000574243	8809/301/3718/5914/3566	5
BP	GO:0002293	alpha-beta T cell differentiation involved in immune response	5/111	63/18866	3.44928e-05	0.000748554	0.000574243	8809/301/3718/5914/3566	5
BP	GO:0046635	positive regulation of alpha-beta T cell activation	5/111	63/18866	3.44928e-05	0.000748554	0.000574243	5788/54440/301/5914/3566	5
BP	GO:2000514	regulation of CD4-positive, alpha-beta T cell activation	5/111	63/18866	3.44928e-05	0.000748554	0.000574243	54440/301/3718/5914/3566	5
BP	GO:0002262	myeloid cell homeostasis	7/111	154/18866	3.51785e-05	0.000754982	0.000579174	2207/2624/3815/301/4067/7538/3718	7
BP	GO:0050869	negative regulation of B cell activation	4/111	32/18866	3.59421e-05	0.000754982	0.000579174	11314/695/64092/4067	4
BP	GO:0002824	positive regulation of adaptive immune response based on somatic recombination of immune receptors built from immunoglobulin superfamily domains	6/111	105/18866	3.63148e-05	0.000754982	0.000579174	5788/2207/54440/8809/695/301	6
BP	GO:0045621	positive regulation of lymphocyte differentiation	6/111	105/18866	3.63148e-05	0.000754982	0.000579174	5788/54440/695/301/5914/3566	6
BP	GO:1902106	negative regulation of leukocyte differentiation	6/111	105/18866	3.63148e-05	0.000754982	0.000579174	2624/301/4067/3718/5914/3566	6
BP	GO:0046637	regulation of alpha-beta T cell differentiation	5/111	64/18866	3.72416e-05	0.000767798	0.000589006	54440/301/3718/5914/3566	5
BP	GO:0046632	alpha-beta T cell differentiation	6/111	106/18866	3.83111e-05	0.00078332	0.000600913	54440/8809/301/3718/5914/3566	6
BP	GO:0030168	platelet activation	7/111	158/18866	4.14397e-05	0.000833512	0.000639417	5579/2207/3937/5023/4067/5777/928	7
BP	GO:1903707	negative regulation of hemopoiesis	7/111	158/18866	4.14397e-05	0.000833512	0.000639417	2624/301/4067/7538/3718/5914/3566	7
BP	GO:1902107	positive regulation of leukocyte differentiation	7/111	159/18866	4.31401e-05	0.000860715	0.000660286	5788/54440/695/301/5914/8737/3566	7
BP	GO:0002821	positive regulation of adaptive immune response	6/111	110/18866	4.71954e-05	0.000934091	0.000716575	5788/2207/54440/8809/695/301	6
BP	GO:0051656	establishment of organelle localization	11/111	432/18866	4.84602e-05	0.000951511	0.000729939	11314/2207/695/2624/3815/5880/8832/4067/79083/27040/3566	11
BP	GO:0051251	positive regulation of lymphocyte activation	10/111	357/18866	4.91781e-05	0.000958004	0.00073492	5788/54440/695/301/3956/4067/5777/3718/5914/3566	10
BP	GO:0050766	positive regulation of phagocytosis	5/111	68/18866	4.99744e-05	0.000965911	0.000740985	5788/2207/2624/1535/6441	5
BP	GO:0098751	bone cell development	4/111	35/18866	5.16277e-05	0.000990131	0.000759566	2313/3815/5777/5305	4
BP	GO:0002755	MyD88-dependent toll-like receptor signaling pathway	4/111	36/18866	5.78188e-05	0.00108366	0.000831318	11314/695/4615/10318	4
BP	GO:0045622	regulation of T-helper cell differentiation	4/111	36/18866	5.78188e-05	0.00108366	0.000831318	301/3718/5914/3566	4
BP	GO:2000516	positive regulation of CD4-positive, alpha-beta T cell activation	4/111	36/18866	5.78188e-05	0.00108366	0.000831318	54440/301/5914/3566	4
BP	GO:0018108	peptidyl-tyrosine phosphorylation	10/111	374/18866	7.24914e-05	0.00134845	0.00103444	11314/5788/695/3815/64092/4067/5777/3718/960/8829	10
BP	GO:0018212	peptidyl-tyrosine modification	10/111	377/18866	7.74543e-05	0.00143001	0.00109702	11314/5788/695/3815/64092/4067/5777/3718/960/8829	10
BP	GO:0045064	T-helper 2 cell differentiation	3/111	15/18866	8.56616e-05	0.00156983	0.00120427	301/5914/3566	3
BP	GO:0046636	negative regulation of alpha-beta T cell activation	4/111	40/18866	8.80955e-05	0.00160256	0.00122938	11314/301/3718/3566	4
BP	GO:0038093	Fc receptor signaling pathway	8/111	241/18866	8.99231e-05	0.00162387	0.00124573	5788/2207/3937/695/3815/2206/4067/27040	8
BP	GO:0006911	phagocytosis, engulfment	6/111	126/18866	0.000100581	0.00180316	0.00138327	11314/2207/2624/51411/5880/391	6
BP	GO:0050672	negative regulation of lymphocyte proliferation	5/111	79/18866	0.000102644	0.00182691	0.00140149	11314/695/4067/5777/6441	5
BP	GO:0033008	positive regulation of mast cell activation involved in immune response	3/111	16/18866	0.000104978	0.00184196	0.00141303	2207/2624/3566	3
BP	GO:0043306	positive regulation of mast cell degranulation	3/111	16/18866	0.000104978	0.00184196	0.00141303	2207/2624/3566	3
BP	GO:0032945	negative regulation of mononuclear cell proliferation	5/111	80/18866	0.000108977	0.00189866	0.00145653	11314/695/4067/5777/6441	5
BP	GO:0002823	negative regulation of adaptive immune response based on somatic recombination of immune receptors built from immunoglobulin superfamily domains	4/111	43/18866	0.000117358	0.00203037	0.00155757	5788/5777/3718/3566	4
BP	GO:0042493	response to drug	10/111	397/18866	0.000118519	0.00203621	0.00156205	969/7050/301/4129/3956/1535/5141/4067/1399/2027	10
BP	GO:0051056	regulation of small GTPase mediated signal transduction	9/111	323/18866	0.000123712	0.00211079	0.00161926	397/9459/5880/26230/117289/4067/391/1399/8829	9
BP	GO:0043087	regulation of GTPase activity	11/111	481/18866	0.000125981	0.00212176	0.00162768	6001/5996/397/9459/26230/117289/80005/391/6000/1399/8829	11
BP	GO:0030889	negative regulation of B cell proliferation	3/111	17/18866	0.000126928	0.00212176	0.00162768	11314/695/4067	3
BP	GO:0045623	negative regulation of T-helper cell differentiation	3/111	17/18866	0.000126928	0.00212176	0.00162768	301/3718/3566	3
BP	GO:0042088	T-helper 1 type immune response	4/111	44/18866	0.000128511	0.0021338	0.00163692	8809/301/3718/3566	4
BP	GO:0002718	regulation of cytokine production involved in immune response	5/111	83/18866	0.00012979	0.00214067	0.00164219	2207/54440/8809/695/3718	5
BP	GO:0099024	plasma membrane invagination	6/111	135/18866	0.000146989	0.00240828	0.00184748	11314/2207/2624/51411/5880/391	6
BP	GO:0001776	leukocyte homeostasis	5/111	86/18866	0.000153521	0.00248242	0.00190435	2207/301/4067/3718/27040	5
BP	GO:0070664	negative regulation of leukocyte proliferation	5/111	86/18866	0.000153521	0.00248242	0.00190435	11314/695/4067/5777/6441	5
BP	GO:0050864	regulation of B cell activation	7/111	195/18866	0.000155258	0.00249421	0.0019134	11314/5788/54440/695/64092/4067/5777	7
BP	GO:0050730	regulation of peptidyl-tyrosine phosphorylation	8/111	263/18866	0.00016422	0.00262117	0.00201079	11314/5788/3815/64092/4067/5777/960/8829	8
BP	GO:0046638	positive regulation of alpha-beta T cell differentiation	4/111	47/18866	0.000166578	0.00264176	0.00202659	54440/301/5914/3566	4
BP	GO:0010324	membrane invagination	6/111	143/18866	0.000201181	0.0031702	0.00243197	11314/2207/2624/51411/5880/391	6
BP	GO:0045582	positive regulation of T cell differentiation	5/111	92/18866	0.000210808	0.00330089	0.00253223	5788/54440/301/5914/3566	5
BP	GO:0007599	hemostasis	9/111	348/18866	0.000216032	0.0033614	0.00257865	5579/2207/3937/2624/2313/5023/4067/5777/928	9
BP	GO:0050852	T cell receptor signaling pathway	7/111	206/18866	0.000217519	0.00336339	0.00258018	11314/5788/3937/5777/3958/1399/27040	7
BP	GO:0043277	apoptotic cell clearance	4/111	51/18866	0.000229206	0.00352208	0.00270192	301/5880/391/5914	4
BP	GO:0006837	serotonin transport	3/111	21/18866	0.000244036	0.00370395	0.00284144	2207/4129/5023	3
BP	GO:0043371	negative regulation of CD4-positive, alpha-beta T cell differentiation	3/111	21/18866	0.000244036	0.00370395	0.00284144	301/3718/3566	3
BP	GO:0045580	regulation of T cell differentiation	6/111	150/18866	0.000260544	0.00390659	0.00299688	5788/54440/301/3718/5914/3566	6
BP	GO:0097530	granulocyte migration	6/111	150/18866	0.000260544	0.00390659	0.00299688	11314/2207/301/5880/3958/391	6
BP	GO:0042100	B cell proliferation	5/111	97/18866	0.000269907	0.00402259	0.00308588	11314/5788/54440/695/4067	5
BP	GO:0001818	negative regulation of cytokine production	9/111	360/18866	0.000277462	0.00409461	0.00314112	5788/695/301/8832/5777/7538/3718/5914/6441	9
BP	GO:0002313	mature B cell differentiation involved in immune response	3/111	22/18866	0.00028136	0.00409461	0.00314112	4242/3955/3956	3
BP	GO:0033005	positive regulation of mast cell activation	3/111	22/18866	0.00028136	0.00409461	0.00314112	2207/2624/3566	3
BP	GO:0045624	positive regulation of T-helper cell differentiation	3/111	22/18866	0.00028136	0.00409461	0.00314112	301/5914/3566	3
BP	GO:0002706	regulation of lymphocyte mediated immunity	6/111	154/18866	0.000300179	0.00434294	0.00333162	5788/2207/54440/8809/695/5777	6
BP	GO:0001819	positive regulation of cytokine production	10/111	447/18866	0.000308011	0.0044211	0.00339159	5788/2207/54440/8809/5724/301/1535/4615/5914/8737	10
BP	GO:0002702	positive regulation of production of molecular mediator of immune response	5/111	100/18866	0.000310942	0.0044211	0.00339159	5788/2207/54440/8809/3566	5
BP	GO:0030219	megakaryocyte differentiation	5/111	100/18866	0.000310942	0.0044211	0.00339159	2624/2313/3815/5777/5305	5
BP	GO:0032703	negative regulation of interleukin-2 production	3/111	23/18866	0.000322181	0.00452681	0.00347268	5788/7538/6441	3
BP	GO:0002712	regulation of B cell mediated immunity	4/111	56/18866	0.000329356	0.00452681	0.00347268	5788/2207/695/5777	4
BP	GO:0002889	regulation of immunoglobulin mediated immune response	4/111	56/18866	0.000329356	0.00452681	0.00347268	5788/2207/695/5777	4
BP	GO:0050732	negative regulation of peptidyl-tyrosine phosphorylation	4/111	56/18866	0.000329356	0.00452681	0.00347268	11314/5788/64092/5777	4
BP	GO:0070228	regulation of lymphocyte apoptotic process	4/111	56/18866	0.000329356	0.00452681	0.00347268	695/4067/3958/3718	4
BP	GO:1903307	positive regulation of regulated secretory pathway	4/111	56/18866	0.000329356	0.00452681	0.00347268	2207/2624/5724/3566	4
BP	GO:0002460	adaptive immune response based on somatic recombination of immune receptors built from immunoglobulin superfamily domains	9/111	370/18866	0.000339134	0.00463546	0.00355603	5788/2207/54440/8809/695/301/5777/3718/3566	9
BP	GO:0032753	positive regulation of interleukin-4 production	3/111	24/18866	0.000366633	0.0049838	0.00382325	2207/54440/5914	3
BP	GO:0031532	actin cytoskeleton reorganization	5/111	105/18866	0.000389636	0.00526754	0.00404092	9535/397/3815/301/8829	5
BP	GO:0006636	unsaturated fatty acid biosynthetic process	4/111	59/18866	0.000402633	0.0053844	0.00413057	27306/241/301/240	4
BP	GO:0046456	icosanoid biosynthetic process	4/111	59/18866	0.000402633	0.0053844	0.00413057	27306/241/301/240	4
BP	GO:0002708	positive regulation of lymphocyte mediated immunity	5/111	106/18866	0.000407028	0.00541392	0.00415321	5788/2207/54440/8809/695	5
BP	GO:0046639	negative regulation of alpha-beta T cell differentiation	3/111	25/18866	0.000414849	0.00545924	0.00418798	301/3718/3566	3
BP	GO:0050857	positive regulation of antigen receptor-mediated signaling pathway	3/111	25/18866	0.000414849	0.00545924	0.00418798	5788/5579/123920	3
BP	GO:0002440	production of molecular mediator of immune response	8/111	306/18866	0.000454821	0.00595358	0.00456721	5788/2207/54440/8809/695/3815/3718/3566	8
BP	GO:0001783	B cell apoptotic process	3/111	26/18866	0.000466957	0.00604844	0.00463998	695/4067/1399	3
BP	GO:0032743	positive regulation of interleukin-2 production	3/111	26/18866	0.000466957	0.00604844	0.00463998	5788/54440/301	3
BP	GO:0038095	Fc-epsilon receptor signaling pathway	6/111	169/18866	0.000492673	0.0063483	0.00487001	2207/3937/695/2206/4067/27040	6
BP	GO:0006940	regulation of smooth muscle contraction	4/111	65/18866	0.000582966	0.00743926	0.00570692	3815/5724/5023/80005	4
BP	GO:0002335	mature B cell differentiation	3/111	28/18866	0.000583353	0.00743926	0.00570692	4242/3955/3956	3
BP	GO:0071216	cellular response to biotic stimulus	7/111	246/18866	0.000632426	0.0080237	0.00615527	695/5724/4615/4067/7431/7538/5914	7
BP	GO:0034110	regulation of homotypic cell-cell adhesion	3/111	30/18866	0.000716803	0.00904781	0.0069409	3956/4067/928	3
BP	GO:0022604	regulation of cell morphogenesis	10/111	499/18866	0.000726034	0.00911781	0.0069946	3815/301/5880/26230/80005/91010/391/1399/960/8829	10
BP	GO:0030218	erythrocyte differentiation	5/111	121/18866	0.000744702	0.00927549	0.00711556	2624/3815/4067/7538/3718	5
BP	GO:0051924	regulation of calcium ion transport	7/111	253/18866	0.000746088	0.00927549	0.00711556	5023/1535/8832/4067/6548/5777/3958	7
BP	GO:0002828	regulation of type 2 immune response	3/111	31/18866	0.000790218	0.00963054	0.00738794	301/5914/3566	3
BP	GO:0008045	motor neuron axon guidance	3/111	31/18866	0.000790218	0.00963054	0.00738794	5880/391/8829	3
BP	GO:0050858	negative regulation of antigen receptor-mediated signaling pathway	3/111	31/18866	0.000790218	0.00963054	0.00738794	11314/5777/3958	3
BP	GO:2000515	negative regulation of CD4-positive, alpha-beta T cell activation	3/111	31/18866	0.000790218	0.00963054	0.00738794	301/3718/3566	3
BP	GO:0032496	response to lipopolysaccharide	8/111	334/18866	0.000806639	0.00978247	0.00750449	1439/5724/4129/4615/4067/7431/7538/5914	8
BP	GO:0043409	negative regulation of MAPK cascade	6/111	187/18866	0.000837706	0.0101097	0.0077555	11314/5788/54900/4067/5777/10318	6
BP	GO:0061515	myeloid cell development	4/111	72/18866	0.000858349	0.0103085	0.00790804	2313/3815/5777/5305	4
BP	GO:0032673	regulation of interleukin-4 production	3/111	32/18866	0.000868247	0.010377	0.00796058	2207/54440/5914	3
BP	GO:0050727	regulation of inflammatory response	9/111	425/18866	0.000915262	0.0108863	0.0083513	5788/2207/695/301/4615/4067/240/10318/8737	9
BP	GO:0006816	calcium ion transport	9/111	426/18866	0.000930487	0.0110145	0.0084496	5788/5579/5023/1535/8832/4067/6548/5777/3958	9
BP	GO:0045637	regulation of myeloid cell differentiation	7/111	263/18866	0.000935921	0.0110185	0.00845272	5579/2624/4067/3958/7538/5914/8737	7
BP	GO:0043405	regulation of MAP kinase activity	8/111	342/18866	0.000939738	0.0110185	0.00845272	11314/5788/3815/54900/4067/5777/1399/8737	8
BP	GO:0045920	negative regulation of exocytosis	3/111	33/18866	0.000951	0.011098	0.00851367	11314/301/8832	3
BP	GO:0007596	blood coagulation	8/111	343/18866	0.000957546	0.0111219	0.00853203	5579/2207/3937/2624/5023/4067/5777/928	8
BP	GO:0034101	erythrocyte homeostasis	5/111	129/18866	0.000993499	0.0114856	0.00881101	2624/3815/4067/7538/3718	5
BP	GO:0007265	Ras protein signal transduction	8/111	346/18866	0.0010126	0.011652	0.00893866	397/79930/5880/4067/391/1399/27040/8829	8
BP	GO:0055094	response to lipoprotein particle	3/111	34/18866	0.00103859	0.0118957	0.0091256	2207/4615/928	3
BP	GO:0050817	coagulation	8/111	349/18866	0.00107017	0.0122009	0.00935975	5579/2207/3937/2624/5023/4067/5777/928	8
BP	GO:0032633	interleukin-4 production	3/111	35/18866	0.00113111	0.0128366	0.00984741	2207/54440/5914	3
BP	GO:0002237	response to molecule of bacterial origin	8/111	356/18866	0.00121472	0.01366	0.0104791	1439/5724/4129/4615/4067/7431/7538/5914	8
BP	GO:0043407	negative regulation of MAP kinase activity	4/111	79/18866	0.00121472	0.01366	0.0104791	11314/54900/4067/5777	4
BP	GO:0010543	regulation of platelet activation	3/111	36/18866	0.00122869	0.0136927	0.0105041	2207/4067/928	3
BP	GO:0071402	cellular response to lipoprotein particle stimulus	3/111	36/18866	0.00122869	0.0136927	0.0105041	2207/4615/928	3
BP	GO:0001933	negative regulation of protein phosphorylation	9/111	444/18866	0.00124174	0.013776	0.0105681	11314/5788/9535/64092/54900/4067/5777/10318/1399	9
BP	GO:0002312	B cell activation involved in immune response	4/111	80/18866	0.00127291	0.0140589	0.0107851	5788/4242/3955/3956	4
BP	GO:0060348	bone development	6/111	204/18866	0.00131189	0.014425	0.0110659	5788/2313/3815/5777/5914/5305	6
BP	GO:0045730	respiratory burst	3/111	37/18866	0.00133141	0.0145106	0.0111316	4689/1535/5880	3
BP	GO:0090050	positive regulation of cell migration involved in sprouting angiogenesis	3/111	37/18866	0.00133141	0.0145106	0.0111316	2624/301/8829	3
BP	GO:0046596	regulation of viral entry into host cell	3/111	38/18866	0.00143937	0.0155502	0.0119292	3956/10581/10410	3
BP	GO:1900026	positive regulation of substrate adhesion-dependent cell spreading	3/111	38/18866	0.00143937	0.0155502	0.0119292	80005/1399/8829	3
BP	GO:0071222	cellular response to lipopolysaccharide	6/111	208/18866	0.00144851	0.0155809	0.0119527	5724/4615/4067/7431/7538/5914	6
BP	GO:0002524	hypersensitivity	2/111	10/18866	0.00149693	0.0158266	0.0121411	2207/695	2
BP	GO:0002887	negative regulation of myeloid leukocyte mediated immunity	2/111	10/18866	0.00149693	0.0158266	0.0121411	11314/8832	2
BP	GO:0034135	regulation of toll-like receptor 2 signaling pathway	2/111	10/18866	0.00149693	0.0158266	0.0121411	1535/4067	2
BP	GO:0050861	positive regulation of B cell receptor signaling pathway	2/111	10/18866	0.00149693	0.0158266	0.0121411	5579/123920	2
BP	GO:0007249	I-kappaB kinase/NF-kappaB signaling	7/111	286/18866	0.00151763	0.0158551	0.012163	5579/6275/695/3956/4615/10318/8737	7
BP	GO:0002573	myeloid leukocyte differentiation	6/111	210/18866	0.00152076	0.0158551	0.012163	2207/2624/3815/4067/5914/8737	6
BP	GO:0046425	regulation of receptor signaling pathway via JAK-STAT	5/111	142/18866	0.00152283	0.0158551	0.012163	11314/5788/3815/4067/3718	5
BP	GO:0140029	exocytic process	4/111	84/18866	0.00152527	0.0158551	0.012163	2207/695/5023/4067	4
BP	GO:0042092	type 2 immune response	3/111	39/18866	0.00155268	0.0160056	0.0122785	301/5914/3566	3
BP	GO:2000249	regulation of actin cytoskeleton reorganization	3/111	39/18866	0.00155268	0.0160056	0.0122785	9535/397/8829	3
BP	GO:0072593	reactive oxygen species metabolic process	7/111	288/18866	0.00157915	0.0162109	0.012436	4689/4129/1535/5880/240/8737/6441	7
BP	GO:0034109	homotypic cell-cell adhesion	4/111	86/18866	0.00166366	0.0168781	0.0129478	3956/4067/5777/928	4
BP	GO:0002714	positive regulation of B cell mediated immunity	3/111	40/18866	0.00167143	0.0168781	0.0129478	5788/2207/695	3
BP	GO:0002891	positive regulation of immunoglobulin mediated immune response	3/111	40/18866	0.00167143	0.0168781	0.0129478	5788/2207/695	3
BP	GO:0043403	skeletal muscle tissue regeneration	3/111	40/18866	0.00167143	0.0168781	0.0129478	301/928/2027	3
BP	GO:0097581	lamellipodium organization	4/111	87/18866	0.00173602	0.017459	0.0133934	3815/9459/5880/960	4
BP	GO:0010810	regulation of cell-substrate adhesion	6/111	217/18866	0.00179546	0.0179837	0.013796	3956/5880/80005/6548/1399/8829	6
BP	GO:0060368	regulation of Fc receptor mediated stimulatory signaling pathway	2/111	11/18866	0.00182256	0.0181085	0.0138917	5788/4067	2
BP	GO:0070673	response to interleukin-18	2/111	11/18866	0.00182256	0.0181085	0.0138917	8809/240	2
BP	GO:0051348	negative regulation of transferase activity	7/111	296/18866	0.00184495	0.0182577	0.0140061	11314/5788/9535/54900/4067/5777/7538	7
BP	GO:0070838	divalent metal ion transport	9/111	471/18866	0.00186176	0.0183506	0.0140774	5788/5579/5023/1535/8832/4067/6548/5777/3958	9
BP	GO:0098760	response to interleukin-7	3/111	42/18866	0.00192562	0.01883	0.0144452	695/3718/1399	3
BP	GO:0098761	cellular response to interleukin-7	3/111	42/18866	0.00192562	0.01883	0.0144452	695/3718/1399	3
BP	GO:0070665	positive regulation of leukocyte proliferation	5/111	150/18866	0.00193755	0.018872	0.0144774	5788/54440/301/4067/3718	5
BP	GO:0061041	regulation of wound healing	5/111	151/18866	0.00199466	0.0192765	0.0147877	2207/301/4067/928/240	5
BP	GO:1904892	regulation of receptor signaling pathway via STAT	5/111	151/18866	0.00199466	0.0192765	0.0147877	11314/5788/3815/4067/3718	5
BP	GO:0071219	cellular response to molecule of bacterial origin	6/111	222/18866	0.00201365	0.0193843	0.0148704	5724/4615/4067/7431/7538/5914	6
BP	GO:0045921	positive regulation of exocytosis	4/111	91/18866	0.00204737	0.0196135	0.0150462	2207/2624/5724/3566	4
BP	GO:0072511	divalent inorganic cation transport	9/111	478/18866	0.00205749	0.0196135	0.0150462	5788/5579/5023/1535/8832/4067/6548/5777/3958	9
BP	GO:0050856	regulation of T cell receptor signaling pathway	3/111	43/18866	0.00206124	0.0196135	0.0150462	11314/5777/3958	3
BP	GO:0001821	histamine secretion	2/111	12/18866	0.00217869	0.0201122	0.0154288	695/4067	2
BP	GO:0002551	mast cell chemotaxis	2/111	12/18866	0.00217869	0.0201122	0.0154288	3815/5880	2
BP	GO:0002863	positive regulation of inflammatory response to antigenic stimulus	2/111	12/18866	0.00217869	0.0201122	0.0154288	2207/695	2
BP	GO:0002923	regulation of humoral immune response mediated by circulating immunoglobulin	2/111	12/18866	0.00217869	0.0201122	0.0154288	5788/5777	2
BP	GO:0014831	gastro-intestinal system smooth muscle contraction	2/111	12/18866	0.00217869	0.0201122	0.0154288	3815/5724	2
BP	GO:0033004	negative regulation of mast cell activation	2/111	12/18866	0.00217869	0.0201122	0.0154288	11314/8832	2
BP	GO:0043301	negative regulation of leukocyte degranulation	2/111	12/18866	0.00217869	0.0201122	0.0154288	11314/8832	2
BP	GO:1901503	ether biosynthetic process	2/111	12/18866	0.00217869	0.0201122	0.0154288	54947/240	2
BP	GO:0032677	regulation of interleukin-8 production	4/111	93/18866	0.00221666	0.0203849	0.015638	5788/301/4615/8737	4
BP	GO:0070372	regulation of ERK1 and ERK2 cascade	7/111	306/18866	0.00222471	0.0203849	0.015638	5788/4067/5777/10318/1399/960/8829	7
BP	GO:0042326	negative regulation of phosphorylation	9/111	484/18866	0.00223806	0.0204316	0.0156738	11314/5788/9535/64092/54900/4067/5777/10318/1399	9
BP	GO:0008360	regulation of cell shape	5/111	156/18866	0.00229882	0.0209091	0.0160402	3815/301/5880/91010/391	5
BP	GO:0002639	positive regulation of immunoglobulin production	3/111	45/18866	0.00234997	0.0211412	0.0162181	5788/54440/3566	3
BP	GO:0007520	myoblast fusion	3/111	45/18866	0.00234997	0.0211412	0.0162181	963/928/3566	3
BP	GO:0052372	modulation by symbiont of entry into host	3/111	45/18866	0.00234997	0.0211412	0.0162181	3956/10581/10410	3
BP	GO:0045638	negative regulation of myeloid cell differentiation	4/111	95/18866	0.00239536	0.021317	0.016353	2624/4067/7538/5914	4
BP	GO:0060337	type I interferon signaling pathway	4/111	95/18866	0.00239536	0.021317	0.016353	10581/4615/5777/10410	4
BP	GO:0071357	cellular response to type I interferon	4/111	95/18866	0.00239536	0.021317	0.016353	10581/4615/5777/10410	4
BP	GO:0050729	positive regulation of inflammatory response	5/111	158/18866	0.00242948	0.0215431	0.0165265	2207/695/4615/10318/8737	5
BP	GO:0043903	regulation of symbiotic process	6/111	231/18866	0.00245627	0.0217029	0.0166491	3956/10581/10410/7538/10318/6441	6
BP	GO:0051092	positive regulation of NF-kappaB transcription factor activity	5/111	159/18866	0.00249679	0.021961	0.0168471	5579/8809/695/4615/8737	5
BP	GO:0045581	negative regulation of T cell differentiation	3/111	46/18866	0.00250324	0.021961	0.0168471	301/3718/3566	3
BP	GO:0002371	dendritic cell cytokine production	2/111	13/18866	0.00256494	0.0222654	0.0170806	3815/3718	2
BP	GO:0097531	mast cell migration	2/111	13/18866	0.00256494	0.0222654	0.0170806	3815/5880	2
BP	GO:1902563	regulation of neutrophil activation	2/111	13/18866	0.00256494	0.0222654	0.0170806	11314/5724	2
BP	GO:1904018	positive regulation of vasculature development	6/111	235/18866	0.00267495	0.0231163	0.0177333	5579/2624/3815/3687/301/8829	6
BP	GO:0048010	vascular endothelial growth factor receptor signaling pathway	4/111	98/18866	0.00268164	0.0231163	0.0177333	4689/5579/1535/8829	4
BP	GO:0034340	response to type I interferon	4/111	99/18866	0.00278205	0.0238807	0.0183198	10581/4615/5777/10410	4
BP	GO:0046777	protein autophosphorylation	6/111	237/18866	0.00278963	0.0238807	0.0183198	5788/695/3815/9262/4067/8737	6
BP	GO:0014911	positive regulation of smooth muscle cell migration	3/111	48/18866	0.002828	0.0240428	0.0184441	80005/6282/8829	3
BP	GO:0033628	regulation of cell adhesion mediated by integrin	3/111	48/18866	0.002828	0.0240428	0.0184441	4067/5777/1399	3
BP	GO:0007259	receptor signaling pathway via JAK-STAT	5/111	164/18866	0.00285386	0.0240971	0.0184857	11314/5788/3815/4067/3718	5
BP	GO:0031960	response to corticosteroid	5/111	164/18866	0.00285386	0.0240971	0.0184857	5724/301/4129/1535/7538	5
BP	GO:0060397	growth hormone receptor signaling pathway via JAK-STAT	2/111	14/18866	0.00298096	0.0248198	0.0190402	4067/3718	2
BP	GO:0070486	leukocyte aggregation	2/111	14/18866	0.00298096	0.0248198	0.0190402	5880/960	2
BP	GO:0032637	interleukin-8 production	4/111	101/18866	0.00299056	0.0248198	0.0190402	5788/301/4615/8737	4
BP	GO:0042102	positive regulation of T cell proliferation	4/111	101/18866	0.00299056	0.0248198	0.0190402	5788/54440/301/3718	4
BP	GO:0015695	organic cation transport	3/111	49/18866	0.00299964	0.0248198	0.0190402	2207/4129/5023	3
BP	GO:0070231	T cell apoptotic process	3/111	49/18866	0.00299964	0.0248198	0.0190402	3958/3718/8737	3
BP	GO:0070371	ERK1 and ERK2 cascade	7/111	325/18866	0.00311026	0.0256493	0.0196765	5788/4067/5777/10318/1399/960/8829	7
BP	GO:0002711	positive regulation of T cell mediated immunity	3/111	50/18866	0.00317757	0.0260308	0.0199692	5788/54440/8809	3
BP	GO:0045646	regulation of erythrocyte differentiation	3/111	50/18866	0.00317757	0.0260308	0.0199692	2624/4067/7538	3
BP	GO:1901570	fatty acid derivative biosynthetic process	4/111	103/18866	0.00320951	0.0262057	0.0201033	27306/241/301/240	4
BP	GO:0048525	negative regulation of viral process	4/111	104/18866	0.00332297	0.0270429	0.0207456	10581/10410/7538/10318	4
BP	GO:0006469	negative regulation of protein kinase activity	6/111	246/18866	0.00335188	0.0271695	0.0208427	11314/5788/9535/54900/4067/5777	6
BP	GO:0002762	negative regulation of myeloid leukocyte differentiation	3/111	51/18866	0.00336184	0.0271695	0.0208427	2624/4067/5914	3
BP	GO:0002864	regulation of acute inflammatory response to antigenic stimulus	2/111	15/18866	0.00342639	0.0271695	0.0208427	2207/695	2
BP	GO:0034134	toll-like receptor 2 signaling pathway	2/111	15/18866	0.00342639	0.0271695	0.0208427	1535/4067	2
BP	GO:0051608	histamine transport	2/111	15/18866	0.00342639	0.0271695	0.0208427	695/4067	2
BP	GO:0060099	regulation of phagocytosis, engulfment	2/111	15/18866	0.00342639	0.0271695	0.0208427	11314/2624	2
BP	GO:0070207	protein homotrimerization	2/111	15/18866	0.00342639	0.0271695	0.0208427	241/6510	2
BP	GO:0072148	epithelial cell fate commitment	2/111	15/18866	0.00342639	0.0271695	0.0208427	5914/8829	2
BP	GO:0014812	muscle cell migration	4/111	106/18866	0.00355805	0.0281234	0.0215745	301/80005/6282/8829	4
BP	GO:0006937	regulation of muscle contraction	5/111	173/18866	0.0035876	0.0282666	0.0216844	3815/5724/5023/80005/6548	5
BP	GO:0097696	receptor signaling pathway via STAT	5/111	174/18866	0.00367674	0.028877	0.0221526	11314/5788/3815/4067/3718	5
BP	GO:1900024	regulation of substrate adhesion-dependent cell spreading	3/111	53/18866	0.00374971	0.0293569	0.0225208	80005/1399/8829	3
BP	GO:0043122	regulation of I-kappaB kinase/NF-kappaB signaling	6/111	252/18866	0.00377105	0.0294308	0.0225774	5579/6275/3956/4615/10318/8737	6
BP	GO:0007229	integrin-mediated signaling pathway	4/111	108/18866	0.00380419	0.0295033	0.0226331	2207/3687/27040/8829	4
BP	GO:0008593	regulation of Notch signaling pathway	4/111	108/18866	0.00380419	0.0295033	0.0226331	4242/3955/2624/3815	4
BP	GO:0002830	positive regulation of type 2 immune response	2/111	16/18866	0.00390087	0.0297863	0.0228501	5914/3566	2
BP	GO:0019372	lipoxygenase pathway	2/111	16/18866	0.00390087	0.0297863	0.0228501	241/240	2
BP	GO:0030214	hyaluronan catabolic process	2/111	16/18866	0.00390087	0.0297863	0.0228501	6548/960	2
BP	GO:0051014	actin filament severing	2/111	16/18866	0.00390087	0.0297863	0.0228501	9535/822	2
BP	GO:1905153	regulation of membrane invagination	2/111	16/18866	0.00390087	0.0297863	0.0228501	11314/2624	2
BP	GO:0006939	smooth muscle contraction	4/111	109/18866	0.00393148	0.0299277	0.0229586	3815/5724/5023/80005	4
BP	GO:0002720	positive regulation of cytokine production involved in immune response	3/111	55/18866	0.00416381	0.0315024	0.0241666	2207/54440/8809	3
BP	GO:0045620	negative regulation of lymphocyte differentiation	3/111	55/18866	0.00416381	0.0315024	0.0241666	301/3718/3566	3
BP	GO:0031295	T cell costimulation	3/111	56/18866	0.00438086	0.0329174	0.0252521	3956/4067/5777	3
BP	GO:0021514	ventral spinal cord interneuron differentiation	2/111	17/18866	0.00440406	0.0329174	0.0252521	2624/8543	2
BP	GO:0050665	hydrogen peroxide biosynthetic process	2/111	17/18866	0.00440406	0.0329174	0.0252521	4129/1535	2
BP	GO:0070206	protein trimerization	2/111	17/18866	0.00440406	0.0329174	0.0252521	241/6510	2
BP	GO:1903034	regulation of response to wounding	5/111	183/18866	0.00455198	0.0339205	0.0260216	2207/301/4067/928/240	5
BP	GO:0042743	hydrogen peroxide metabolic process	3/111	57/18866	0.00460465	0.0340057	0.026087	4129/1535/5880	3
BP	GO:0045747	positive regulation of Notch signaling pathway	3/111	57/18866	0.00460465	0.0340057	0.026087	4242/3955/3815	3
BP	GO:1905517	macrophage migration	3/111	57/18866	0.00460465	0.0340057	0.026087	3958/928/6441	3
BP	GO:0000768	syncytium formation by plasma membrane fusion	3/111	58/18866	0.00483525	0.0353917	0.0271503	963/928/3566	3
BP	GO:0031294	lymphocyte costimulation	3/111	58/18866	0.00483525	0.0353917	0.0271503	3956/4067/5777	3
BP	GO:0140253	cell-cell fusion	3/111	58/18866	0.00483525	0.0353917	0.0271503	963/928/3566	3
BP	GO:0043652	engulfment of apoptotic cell	2/111	18/18866	0.00493561	0.0359139	0.0275508	5880/391	2
BP	GO:0046597	negative regulation of viral entry into host cell	2/111	18/18866	0.00493561	0.0359139	0.0275508	10581/10410	2
BP	GO:0045454	cell redox homeostasis	3/111	59/18866	0.00507271	0.0367407	0.0281851	4689/1535/5880	3
BP	GO:0033673	negative regulation of kinase activity	6/111	268/18866	0.00507895	0.0367407	0.0281851	11314/5788/9535/54900/4067/5777	6
BP	GO:0043123	positive regulation of I-kappaB kinase/NF-kappaB signaling	5/111	188/18866	0.00509768	0.0367687	0.0282066	5579/6275/3956/4615/8737	5
BP	GO:0033559	unsaturated fatty acid metabolic process	4/111	118/18866	0.00520918	0.0373551	0.0286564	27306/241/301/240	4
BP	GO:0051209	release of sequestered calcium ion into cytosol	4/111	118/18866	0.00520918	0.0373551	0.0286564	5788/1535/4067/5777	4
BP	GO:0051091	positive regulation of DNA-binding transcription factor activity	6/111	270/18866	0.00526321	0.0375842	0.0288322	5579/8809/695/3815/4615/8737	6
BP	GO:0006949	syncytium formation	3/111	60/18866	0.00531709	0.0375842	0.0288322	963/928/3566	3
BP	GO:0019229	regulation of vasoconstriction	3/111	60/18866	0.00531709	0.0375842	0.0288322	5724/5023/80005	3
BP	GO:0030865	cortical cytoskeleton organization	3/111	60/18866	0.00531709	0.0375842	0.0288322	5880/91010/391	3
BP	GO:0032653	regulation of interleukin-10 production	3/111	60/18866	0.00531709	0.0375842	0.0288322	2207/54440/3718	3
BP	GO:0031589	cell-substrate adhesion	7/111	359/18866	0.00534093	0.0376452	0.028879	3956/5880/80005/6548/1399/960/8829	7
BP	GO:0051283	negative regulation of sequestering of calcium ion	4/111	119/18866	0.00536635	0.0377169	0.028934	5788/1535/4067/5777	4
BP	GO:0032956	regulation of actin cytoskeleton organization	7/111	360/18866	0.00542099	0.037993	0.0291458	9535/397/822/5880/6548/391/8829	7
BP	GO:0071800	podosome assembly	2/111	19/18866	0.00549518	0.0384042	0.0294612	3936/51411	2
BP	GO:0048015	phosphatidylinositol-mediated signaling	5/111	192/18866	0.00556648	0.0386976	0.0296863	3815/5724/4067/5777/5305	5
BP	GO:0045071	negative regulation of viral genome replication	3/111	61/18866	0.00556845	0.0386976	0.0296863	10581/10410/10318	3
BP	GO:0051282	regulation of sequestering of calcium ion	4/111	121/18866	0.00569015	0.0394326	0.0302501	5788/1535/4067/5777	4
BP	GO:0002260	lymphocyte homeostasis	3/111	62/18866	0.00582683	0.0400271	0.0307062	4067/3718/27040	3
BP	GO:0034113	heterotypic cell-cell adhesion	3/111	62/18866	0.00582683	0.0400271	0.0307062	5788/3687/960	3
BP	GO:0070527	platelet aggregation	3/111	62/18866	0.00582683	0.0400271	0.0307062	4067/5777/928	3
BP	GO:0006690	icosanoid metabolic process	4/111	122/18866	0.00585683	0.0400271	0.0307062	27306/241/301/240	4
BP	GO:1990266	neutrophil migration	4/111	122/18866	0.00585683	0.0400271	0.0307062	2207/5880/3958/391	4
BP	GO:0002449	lymphocyte mediated immunity	7/111	366/18866	0.0059204	0.04035	0.030954	5788/2207/54440/8809/695/5777/3566	7
BP	GO:0050731	positive regulation of peptidyl-tyrosine phosphorylation	5/111	195/18866	0.00593752	0.0403555	0.0309582	5788/3815/4067/960/8829	5
BP	GO:0002761	regulation of myeloid leukocyte differentiation	4/111	123/18866	0.00602674	0.0406263	0.0311659	2624/4067/5914/8737	4
BP	GO:0048017	inositol lipid-mediated signaling	5/111	196/18866	0.00606498	0.0406263	0.0311659	3815/5724/4067/5777/5305	5
BP	GO:0002726	positive regulation of T cell cytokine production	2/111	20/18866	0.00608241	0.0406263	0.0311659	54440/8809	2
BP	GO:0002827	positive regulation of T-helper 1 type immune response	2/111	20/18866	0.00608241	0.0406263	0.0311659	8809/301	2
BP	GO:0002902	regulation of B cell apoptotic process	2/111	20/18866	0.00608241	0.0406263	0.0311659	695/4067	2
BP	GO:1901741	positive regulation of myoblast fusion	2/111	20/18866	0.00608241	0.0406263	0.0311659	963/3566	2
BP	GO:0032613	interleukin-10 production	3/111	63/18866	0.0060923	0.0406263	0.0311659	2207/54440/3718	3
BP	GO:0051208	sequestering of calcium ion	4/111	124/18866	0.00619991	0.0412327	0.0316311	5788/1535/4067/5777	4
BP	GO:0019370	leukotriene biosynthetic process	2/111	21/18866	0.00669698	0.0439478	0.0337139	241/240	2
BP	GO:0032516	positive regulation of phosphoprotein phosphatase activity	2/111	21/18866	0.00669698	0.0439478	0.0337139	11314/5788	2
BP	GO:0035455	response to interferon-alpha	2/111	21/18866	0.00669698	0.0439478	0.0337139	10581/10410	2
BP	GO:0061042	vascular wound healing	2/111	21/18866	0.00669698	0.0439478	0.0337139	2624/240	2
BP	GO:0090330	regulation of platelet aggregation	2/111	21/18866	0.00669698	0.0439478	0.0337139	4067/928	2
BP	GO:0014066	regulation of phosphatidylinositol 3-kinase signaling	4/111	127/18866	0.00673919	0.0439915	0.0337474	3815/4067/5777/5305	4
BP	GO:0071621	granulocyte chemotaxis	4/111	127/18866	0.00673919	0.0439915	0.0337474	2207/301/5880/3958	4
BP	GO:0034341	response to interferon-gamma	5/111	202/18866	0.00687053	0.0447308	0.0343146	5724/10581/7431/10410/960	5
BP	GO:0002576	platelet degranulation	4/111	129/18866	0.00711546	0.0462038	0.0354446	2207/5023/4067/928	4
BP	GO:0002548	monocyte chemotaxis	3/111	67/18866	0.00722592	0.046676	0.0358069	301/4067/3958	3
BP	GO:1903672	positive regulation of sprouting angiogenesis	3/111	67/18866	0.00722592	0.046676	0.0358069	2624/301/8829	3
BP	GO:1901739	regulation of myoblast fusion	2/111	22/18866	0.00733854	0.0472801	0.0362702	963/3566	2
BP	GO:0002637	regulation of immunoglobulin production	3/111	68/18866	0.00752749	0.0483715	0.0371075	5788/54440/3566	3
BP	GO:0031349	positive regulation of defense response	7/111	385/18866	0.00773081	0.0495329	0.0379985	2207/695/1535/4615/4067/10318/8737	7
BP	GO:0045766	positive regulation of angiogenesis	5/111	208/18866	0.00774827	0.0495329	0.0379985	5579/2624/3687/301/8829	5
BP	GO:0030032	lamellipodium assembly	3/111	69/18866	0.00783642	0.0499673	0.0383317	3815/9459/5880	3
CC	GO:0030667	secretory granule membrane	13/116	306/19559	3.39499e-08	7.19737e-06	6.07524e-06	11314/5788/2207/963/5724/3687/5023/79930/1535/3958/928/391/960	13
CC	GO:0042629	mast cell granule	5/116	22/19559	1.63448e-07	1.73255e-05	1.46243e-05	695/3815/301/4067/27040	5
CC	GO:0070820	tertiary granule	9/116	164/19559	5.82315e-07	4.11502e-05	3.47346e-05	11314/2207/963/5724/3687/79930/1535/5777/3958	9
CC	GO:0031252	cell leading edge	13/116	421/19559	1.30756e-06	6.93007e-05	5.84961e-05	3936/822/9459/5880/26230/64092/5141/6548/7431/8543/9260/6282/960	13
CC	GO:0070821	tertiary granule membrane	6/116	73/19559	4.70536e-06	0.000199507	0.000168402	11314/2207/963/5724/3687/1535	6
CC	GO:0005925	focal adhesion	12/116	415/19559	6.68883e-06	0.000236339	0.000199491	5788/3936/301/1535/5880/6548/7431/9260/928/391/960/8829	12
CC	GO:0030055	cell-substrate junction	12/116	423/19559	8.10944e-06	0.0002456	0.000207309	5788/3936/301/1535/5880/6548/7431/9260/928/391/960/8829	12
CC	GO:0101003	ficolin-1-rich granule membrane	5/116	61/19559	3.07101e-05	0.000813818	0.000686937	11314/2207/3687/79930/3958	5
CC	GO:0001772	immunological synapse	4/116	39/19559	8.23001e-05	0.00193862	0.00163638	951/963/3958/27040	4
CC	GO:0045121	membrane raft	9/116	329/19559	0.000152186	0.00300047	0.00253267	5788/3937/962/695/5023/4067/6548/27040/8737	9
CC	GO:0098857	membrane microdomain	9/116	330/19559	0.000155685	0.00300047	0.00253267	5788/3937/962/695/5023/4067/6548/27040/8737	9
CC	GO:0098589	membrane region	9/116	343/19559	0.000207646	0.00366841	0.00309647	5788/3937/962/695/5023/4067/6548/27040/8737	9
CC	GO:0001891	phagocytic cup	3/116	27/19559	0.00053589	0.00873913	0.00737663	3936/51411/301	3
CC	GO:0001726	ruffle	6/116	179/19559	0.000697819	0.010567	0.00891949	3936/822/64092/5141/9260/6282	6
CC	GO:0030027	lamellipodium	6/116	201/19559	0.0012713	0.0179677	0.0151664	822/9459/5880/26230/6548/960	6
CC	GO:0043020	NADPH oxidase complex	2/116	12/19559	0.00221388	0.0293338	0.0247604	4689/1535	2
CC	GO:0005911	cell-cell junction	9/116	493/19559	0.00268897	0.033533	0.028305	3937/3815/963/301/6548/5777/9260/6282/27040	9
CC	GO:0034774	secretory granule lumen	7/116	322/19559	0.00310149	0.0346566	0.0292533	9535/51411/11240/83716/5777/240/6282	7
CC	GO:0060205	cytoplasmic vesicle lumen	7/116	326/19559	0.0033196	0.0346566	0.0292533	9535/51411/11240/83716/5777/240/6282	7
CC	GO:0009897	external side of plasma membrane	8/116	417/19559	0.0034251	0.0346566	0.0292533	5788/2207/969/3815/2206/301/5023/928	8
CC	GO:0031983	vesicle lumen	7/116	328/19559	0.00343296	0.0346566	0.0292533	9535/51411/11240/83716/5777/240/6282	7
MF	GO:0005096	GTPase activator activity	9/111	275/18352	4.45289e-05	0.0153625	0.0140149	6001/5996/397/9459/26230/117289/80005/6000/8829	9
MF	GO:0030695	GTPase regulator activity	9/111	307/18352	0.000103605	0.0178719	0.0163042	6001/5996/397/9459/26230/117289/80005/6000/8829	9
MF	GO:0060589	nucleoside-triphosphatase regulator activity	9/111	348/18352	0.000264481	0.0304153	0.0277473	6001/5996/397/9459/26230/117289/80005/6000/8829	9
MF	GO:0019865	immunoglobulin binding	3/111	24/18352	0.000397308	0.0342678	0.0312618	2207/2206/3958	3
