# Supplementary material for: scGENA: A Single-Cell Gene Coexpression Network Analysis Framework for Clustering Cell Types and Revealing Biological Mechanisms
Source: Bioengineering (Basel). 2022 Jul 30;9(8):353. doi: 10.3390/bioengineering9080353 (PMC9405199; doi:10.3390/bioengineering9080353)
Supplement: Supplementary file 1 [file bioengineering-09-00353-s001.zip › Table S9-S10 Delta Cells GO.xlsx]

## Sheet: Sheet1
ONTOLOGY	ID	Description	GeneRatio	BgRatio	pvalue	p.adjust	qvalue	geneID	Count
BP	GO:0006119	oxidative phosphorylation	1932-07-01	148/18862	4.53445e-09	5.76782e-06	3.89963e-06	11315/4535/4509/4513/4519/4538/4536	7
BP	GO:0042775	mitochondrial ATP synthesis coupled electron transport	1932-06-01	99/18862	1.4554e-08	6.55703e-06	4.43321e-06	11315/4535/4513/4519/4538/4536	6
BP	GO:0042773	ATP synthesis coupled electron transport	1932-06-01	100/18862	1.54647e-08	6.55703e-06	4.43321e-06	11315/4535/4513/4519/4538/4536	6
BP	GO:0022904	respiratory electron transport chain	1932-06-01	117/18862	3.97655e-08	1.26454e-05	8.54958e-06	11315/4535/4513/4519/4538/4536	6
BP	GO:0022900	electron transport chain	1932-06-01	178/18862	4.79821e-07	0.000122067	8.25293e-05	11315/4535/4513/4519/4538/4536	6
BP	GO:0045333	cellular respiration	1932-06-01	187/18862	6.40866e-07	0.000135864	9.18575e-05	11315/4535/4513/4519/4538/4536	6
BP	GO:0046034	ATP metabolic process	1932-07-01	313/18862	7.63833e-07	0.000138799	9.38423e-05	11315/4535/4509/4513/4519/4538/4536	7
BP	GO:0006120	mitochondrial electron transport, NADH to ubiquinone	1932-04-01	55/18862	2.18938e-06	0.000348112	0.000235359	11315/4535/4538/4536	4
BP	GO:1902600	proton transmembrane transport	1932-05-01	157/18862	6.29493e-06	0.000811166	0.00054843	11315/4509/4513/4519/4538	5
BP	GO:0015980	energy derivation by oxidation of organic compounds	1932-06-01	278/18862	6.37709e-06	0.000811166	0.00054843	11315/4535/4513/4519/4538/4536	6
BP	GO:0009409	response to cold	1932-03-01	47/18862	6.8363e-05	0.00790525	0.00534475	4513/2308/27344	3
BP	GO:0010257	NADH dehydrogenase complex assembly	1932-03-01	65/18862	0.000180378	0.0165446	0.0111858	4535/4538/4536	3
BP	GO:0032981	mitochondrial respiratory chain complex I assembly	1932-03-01	65/18862	0.000180378	0.0165446	0.0111858	4535/4538/4536	3
BP	GO:0046689	response to mercury ion	1932-02-01	12/18862	0.000182095	0.0165446	0.0111858	11315/4519	2
BP	GO:0031016	pancreas development	1932-03-01	73/18862	0.000254485	0.0215804	0.0145905	2308/3642/3670	3
BP	GO:1901654	response to ketone	1932-04-01	193/18862	0.000305321	0.024273	0.016411	4678/11315/2308/54331	4
BP	GO:0030073	insulin secretion	1932-04-01	207/18862	0.000398214	0.0291516	0.0197094	11315/1946/846/3670	4
BP	GO:0009060	aerobic respiration	1932-03-01	86/18862	0.000412523	0.0291516	0.0197094	4535/4513/4538	3
BP	GO:1901655	cellular response to ketone	1932-03-01	92/18862	0.00050272	0.0313937	0.0212253	11315/2308/54331	3
BP	GO:0009713	catechol-containing compound biosynthetic process	1932-02-01	20/18862	0.000519787	0.0313937	0.0212253	11315/3642	2
BP	GO:0042423	catecholamine biosynthetic process	1932-02-01	20/18862	0.000519787	0.0313937	0.0212253	11315/3642	2
BP	GO:0009266	response to temperature stimulus	1932-04-01	228/18862	0.000573224	0.0313937	0.0212253	4513/2308/27344/4519	4
BP	GO:0042593	glucose homeostasis	1932-04-01	229/18862	0.000582723	0.0313937	0.0212253	11315/1946/846/2308	4
BP	GO:0033500	carbohydrate homeostasis	1932-04-01	230/18862	0.000592334	0.0313937	0.0212253	11315/1946/846/2308	4
BP	GO:0055093	response to hyperoxia	1932-02-01	22/18862	0.000630614	0.0320856	0.0216931	2308/4519	2
BP	GO:0033108	mitochondrial respiratory chain complex assembly	1932-03-01	101/18862	0.000660261	0.032302	0.0218394	4535/4538/4536	3
BP	GO:0002021	response to dietary excess	1932-02-01	23/18862	0.000689941	0.0325039	0.0219759	6653/27344	2
BP	GO:0030072	peptide hormone secretion	1932-04-01	247/18862	0.00077352	0.0351399	0.0237581	11315/1946/846/3670	4
BP	GO:0031667	response to nutrient levels	1932-05-01	451/18862	0.000903196	0.039616	0.0267844	6653/846/2308/27344/4519	5
BP	GO:0036296	response to increased oxygen levels	1932-02-01	29/18862	0.00110017	0.0461131	0.0311771	2308/4519	2
BP	GO:0035270	endocrine system development	1932-03-01	122/18862	0.00114183	0.0461131	0.0311771	2308/3642/3670	3
BP	GO:0009991	response to extracellular stimulus	1932-05-01	477/18862	0.00116008	0.0461131	0.0311771	6653/846/2308/27344/4519	5
BP	GO:0016486	peptide hormone processing	1932-02-01	32/18862	0.00133979	0.0516427	0.0349157	27344/5122	2
BP	GO:0140448	signaling receptor ligand precursor processing	1932-02-01	33/18862	0.00142472	0.0533012	0.036037	27344/5122	2
BP	GO:0046879	hormone secretion	1932-04-01	302/18862	0.00162676	0.0586942	0.0396832	11315/1946/846/3670	4
BP	GO:0031333	negative regulation of protein-containing complex assembly	1932-03-01	139/18862	0.00166116	0.0586942	0.0396832	11315/6653/3670	3
BP	GO:0009914	hormone transport	1932-04-01	312/18862	0.0018325	0.060004	0.0405688	11315/1946/846/3670	4
BP	GO:0001678	cellular glucose homeostasis	1932-03-01	145/18862	0.00187444	0.060004	0.0405688	1946/846/2308	3
BP	GO:0042401	cellular biogenic amine biosynthetic process	1932-02-01	38/18862	0.00188692	0.060004	0.0405688	11315/3642	2
BP	GO:0060612	adipose tissue development	1932-02-01	38/18862	0.00188692	0.060004	0.0405688	6653/846	2
BP	GO:0009309	amine biosynthetic process	1932-02-01	39/18862	0.00198681	0.0616397	0.0416746	11315/3642	2
BP	GO:0046688	response to copper ion	1932-02-01	42/18862	0.00230125	0.0696951	0.0471209	11315/4519	2
BP	GO:0046189	phenol-containing compound biosynthetic process	1932-02-01	43/18862	0.00241096	0.0713196	0.0482192	11315/3642	2
BP	GO:0031018	endocrine pancreas development	1932-02-01	45/18862	0.00263766	0.0762525	0.0515543	2308/3642	2
BP	GO:0010721	negative regulation of cell development	1932-03-01	174/18862	0.00314397	0.0859795	0.0581308	6653/1946/5802	3
BP	GO:0009306	protein secretion	1932-04-01	367/18862	0.00329643	0.0859795	0.0581308	11315/1946/846/3670	4
BP	GO:0035592	establishment of protein localization to extracellular region	1932-04-01	368/18862	0.00332871	0.0859795	0.0581308	11315/1946/846/3670	4
BP	GO:0050796	regulation of insulin secretion	1932-03-01	178/18862	0.00335173	0.0859795	0.0581308	1946/846/3670	3
BP	GO:0006584	catecholamine metabolic process	1932-02-01	52/18862	0.00350684	0.0859795	0.0581308	11315/3642	2
BP	GO:0009712	catechol-containing compound metabolic process	1932-02-01	52/18862	0.00350684	0.0859795	0.0581308	11315/3642	2
BP	GO:0031103	axon regeneration	1932-02-01	52/18862	0.00350684	0.0859795	0.0581308	5802/3670	2
BP	GO:0071692	protein localization to extracellular region	1932-04-01	375/18862	0.00356076	0.0859795	0.0581308	11315/1946/846/3670	4
BP	GO:0006611	protein export from nucleus	1932-03-01	183/18862	0.00362306	0.0859795	0.0581308	23293/11315/6209	3
BP	GO:0035065	regulation of histone acetylation	1932-02-01	54/18862	0.00377655	0.0859795	0.0581308	11315/3670	2
BP	GO:0070482	response to oxygen levels	1932-04-01	385/18862	0.00391109	0.0859795	0.0581308	846/2308/4519/4538	4
BP	GO:0071385	cellular response to glucocorticoid stimulus	1932-02-01	55/18862	0.00391492	0.0859795	0.0581308	2308/3670	2
BP	GO:1903428	positive regulation of reactive oxygen species biosynthetic process	1932-02-01	55/18862	0.00391492	0.0859795	0.0581308	11315/4513	2
BP	GO:0006754	ATP biosynthetic process	1932-02-01	56/18862	0.00405564	0.0859795	0.0581308	4509/4513	2
BP	GO:0042743	hydrogen peroxide metabolic process	1932-02-01	56/18862	0.00405564	0.0859795	0.0581308	11315/4513	2
BP	GO:0043388	positive regulation of DNA binding	1932-02-01	56/18862	0.00405564	0.0859795	0.0581308	11315/3670	2
BP	GO:0031099	regeneration	1932-03-01	192/18862	0.0041446	0.0864252	0.0584321	5802/4519/3670	3
BP	GO:1901215	negative regulation of neuron death	1932-03-01	195/18862	0.00432808	0.0877084	0.0592997	11315/6653/3670	3
BP	GO:0031102	neuron projection regeneration	1932-02-01	58/18862	0.00434405	0.0877084	0.0592997	5802/3670	2
BP	GO:0002790	peptide secretion	1932-04-01	401/18862	0.00451935	0.0880997	0.0595643	11315/1946/846/3670	4
BP	GO:0071384	cellular response to corticosteroid stimulus	1932-02-01	60/18862	0.00464171	0.0880997	0.0595643	2308/3670	2
BP	GO:0006473	protein acetylation	1932-03-01	200/18862	0.00464475	0.0880997	0.0595643	11315/2308/3670	3
BP	GO:0051168	nuclear export	1932-03-01	201/18862	0.00470973	0.0880997	0.0595643	23293/11315/6209	3
BP	GO:0071383	cellular response to steroid hormone stimulus	1932-03-01	201/18862	0.00470973	0.0880997	0.0595643	11315/2308/3670	3
BP	GO:2000756	regulation of peptidyl-lysine acetylation	1932-02-01	62/18862	0.00494857	0.0912259	0.0616779	11315/3670	2
BP	GO:0072522	purine-containing compound biosynthetic process	1932-03-01	208/18862	0.00518008	0.0917333	0.0620209	4860/4509/4513	3
BP	GO:0051651	maintenance of location in cell	1932-03-01	209/18862	0.00524951	0.0917333	0.0620209	2512/11315/6653	3
BP	GO:0090276	regulation of peptide hormone secretion	1932-03-01	209/18862	0.00524951	0.0917333	0.0620209	1946/846/3670	3
BP	GO:0032507	maintenance of protein location in cell	1932-02-01	64/18862	0.00526457	0.0917333	0.0620209	11315/6653	2
BP	GO:0070265	necrotic cell death	1932-02-01	65/18862	0.00542597	0.093268	0.0630586	197259/4513	2
BP	GO:0009206	purine ribonucleoside triphosphate biosynthetic process	1932-02-01	67/18862	0.00575555	0.0976141	0.065997	4509/4513	2
BP	GO:0042445	hormone metabolic process	1932-03-01	218/18862	0.00589976	0.0978566	0.0661609	10202/27344/5122	3
BP	GO:0009145	purine nucleoside triphosphate biosynthetic process	1932-02-01	68/18862	0.00592371	0.0978566	0.0661609	4509/4513	2
BP	GO:0006163	purine nucleotide metabolic process	1932-04-01	441/18862	0.00631368	0.102791	0.0694971	4860/64087/4509/4513	4
BP	GO:0032024	positive regulation of insulin secretion	1932-02-01	71/18862	0.00644159	0.102791	0.0694971	846/3670	2
BP	GO:0006979	response to oxidative stress	1932-04-01	444/18862	0.00646485	0.102791	0.0694971	11315/4535/2308/10202	4
BP	GO:0043254	regulation of protein-containing complex assembly	1932-04-01	446/18862	0.00656697	0.103126	0.0697233	11315/6653/3642/3670	4
BP	GO:0009201	ribonucleoside triphosphate biosynthetic process	1932-02-01	73/18862	0.00679792	0.10418	0.0704363	4509/4513	2
BP	GO:0033143	regulation of intracellular steroid hormone receptor signaling pathway	1932-02-01	73/18862	0.00679792	0.10418	0.0704363	11315/3670	2
BP	GO:0097305	response to alcohol	1932-03-01	233/18862	0.00708706	0.107318	0.072558	4519/4538/54331	3
BP	GO:0072521	purine-containing compound metabolic process	1932-04-01	460/18862	0.00731209	0.108695	0.0734891	4860/64087/4509/4513	4
BP	GO:1901983	regulation of protein acetylation	1932-02-01	76/18862	0.00734891	0.108695	0.0734891	11315/3670	2
BP	GO:0048678	response to axon injury	1932-02-01	77/18862	0.00753693	0.109839	0.0742625	5802/3670	2
BP	GO:0009636	response to toxic substance	1932-03-01	239/18862	0.00759895	0.109839	0.0742625	11315/10202/4519	3
BP	GO:0043543	protein acylation	1932-03-01	242/18862	0.00786293	0.112378	0.0759789	11315/2308/3670	3
BP	GO:0009205	purine ribonucleoside triphosphate metabolic process	1932-02-01	80/18862	0.008114	0.112969	0.0763782	4509/4513	2
BP	GO:0010951	negative regulation of endopeptidase activity	1932-03-01	245/18862	0.0081323	0.112969	0.0763782	11315/6653/27344	3
BP	GO:0023061	signal release	1932-04-01	475/18862	0.00817069	0.112969	0.0763782	11315/1946/846/3670	4
BP	GO:0009142	nucleoside triphosphate biosynthetic process	1932-02-01	84/18862	0.00891346	0.121673	0.0822631	4509/4513	2
BP	GO:0010466	negative regulation of peptidase activity	1932-03-01	257/18862	0.0092642	0.121673	0.0822631	11315/6653/27344	3
BP	GO:0009144	purine nucleoside triphosphate metabolic process	1932-02-01	86/18862	0.00932592	0.121673	0.0822631	4509/4513	2
BP	GO:0009199	ribonucleoside triphosphate metabolic process	1932-02-01	87/18862	0.00953531	0.121673	0.0822631	4509/4513	2
BP	GO:0046883	regulation of hormone secretion	1932-03-01	260/18862	0.0095609	0.121673	0.0822631	1946/846/3670	3
BP	GO:0051403	stress-activated MAPK cascade	1932-03-01	261/18862	0.00966103	0.121673	0.0822631	197259/846/2308	3
BP	GO:0033273	response to vitamin	1932-02-01	89/18862	0.00996038	0.121673	0.0822631	846/4519	2
BP	GO:0009165	nucleotide biosynthetic process	1932-03-01	264/18862	0.00996512	0.121673	0.0822631	4860/4509/4513	3
BP	GO:0070301	cellular response to hydrogen peroxide	1932-02-01	90/18862	0.010176	0.121673	0.0822631	11315/2308	2
BP	GO:1901293	nucleoside phosphate biosynthetic process	1932-03-01	267/18862	0.0102748	0.121673	0.0822631	4860/4509/4513	3
BP	GO:0045185	maintenance of protein location	1932-02-01	92/18862	0.0106136	0.121673	0.0822631	11315/6653	2
BP	GO:0021549	cerebellum development	1932-02-01	94/18862	0.0110594	0.121673	0.0822631	5802/4538	2
BP	GO:0031098	stress-activated protein kinase signaling cascade	1932-03-01	276/18862	0.0112373	0.121673	0.0822631	197259/846/2308	3
BP	GO:0090277	positive regulation of peptide hormone secretion	1932-02-01	95/18862	0.0112853	0.121673	0.0822631	846/3670	2
BP	GO:0032091	negative regulation of protein binding	1932-02-01	96/18862	0.0115133	0.121673	0.0822631	11315/6653	2
BP	GO:0050708	regulation of protein secretion	1932-03-01	279/18862	0.0115694	0.121673	0.0822631	1946/846/3670	3
BP	GO:0072593	reactive oxygen species metabolic process	1932-03-01	281/18862	0.011794	0.121673	0.0822631	11315/4513/4536	3
BP	GO:0021510	spinal cord development	1932-02-01	99/18862	0.0122095	0.121673	0.0822631	5802/3670	2
BP	GO:1903426	regulation of reactive oxygen species biosynthetic process	1932-02-01	99/18862	0.0122095	0.121673	0.0822631	11315/4513	2
BP	GO:0022037	metencephalon development	1932-02-01	101/18862	0.0126836	0.121673	0.0822631	5802/4538	2
BP	GO:2000379	positive regulation of reactive oxygen species metabolic process	1932-02-01	101/18862	0.0126836	0.121673	0.0822631	11315/4513	2
BP	GO:0006576	cellular biogenic amine metabolic process	1932-02-01	103/18862	0.0131658	0.121673	0.0822631	11315/3642	2
BP	GO:0051604	protein maturation	1932-03-01	293/18862	0.0131943	0.121673	0.0822631	6653/27344/5122	3
BP	GO:0035335	peptidyl-tyrosine dephosphorylation	1932-02-01	104/18862	0.0134098	0.121673	0.0822631	5802/7803	2
BP	GO:0007218	neuropeptide signaling pathway	1932-02-01	106/18862	0.0139039	0.121673	0.0822631	6653/27344	2
BP	GO:0018958	phenol-containing compound metabolic process	1932-02-01	106/18862	0.0139039	0.121673	0.0822631	11315/3642	2
BP	GO:0034599	cellular response to oxidative stress	1932-03-01	299/18862	0.0139289	0.121673	0.0822631	11315/2308/10202	3
BP	GO:1901214	regulation of neuron death	1932-03-01	302/18862	0.0143048	0.121673	0.0822631	11315/6653/3670	3
BP	GO:0009141	nucleoside triphosphate metabolic process	1932-02-01	109/18862	0.0146596	0.121673	0.0822631	4509/4513	2
BP	GO:0002791	regulation of peptide secretion	1932-03-01	308/18862	0.0150739	0.121673	0.0822631	1946/846/3670	3
BP	GO:0051222	positive regulation of protein transport	1932-03-01	312/18862	0.0155995	0.121673	0.0822631	6653/846/3670	3
BP	GO:0030518	intracellular steroid hormone receptor signaling pathway	1932-02-01	113/18862	0.0156944	0.121673	0.0822631	11315/3670	2
BP	GO:0051235	maintenance of location	1932-03-01	319/18862	0.0165443	0.121673	0.0822631	2512/11315/6653	3
BP	GO:0002024	diet induced thermogenesis	1932-01-01	10/18862	0.0168404	0.121673	0.0822631	6653	1
BP	GO:0006152	purine nucleoside catabolic process	1932-01-01	10/18862	0.0168404	0.121673	0.0822631	4860	1
BP	GO:0007191	adenylate cyclase-activating dopamine receptor signaling pathway	1932-01-01	10/18862	0.0168404	0.121673	0.0822631	54331	1
BP	GO:0007256	activation of JNKK activity	1932-01-01	10/18862	0.0168404	0.121673	0.0822631	197259	1
BP	GO:0021520	spinal cord motor neuron cell fate specification	1932-01-01	10/18862	0.0168404	0.121673	0.0822631	3670	1
BP	GO:0032650	regulation of interleukin-1 alpha production	1932-01-01	10/18862	0.0168404	0.121673	0.0822631	3670	1
BP	GO:0033860	regulation of NAD(P)H oxidase activity	1932-01-01	10/18862	0.0168404	0.121673	0.0822631	11315	1
BP	GO:0035646	endosome to melanosome transport	1932-01-01	10/18862	0.0168404	0.121673	0.0822631	967	1
BP	GO:0043485	endosome to pigment granule transport	1932-01-01	10/18862	0.0168404	0.121673	0.0822631	967	1
BP	GO:0046130	purine ribonucleoside catabolic process	1932-01-01	10/18862	0.0168404	0.121673	0.0822631	4860	1
BP	GO:0048757	pigment granule maturation	1932-01-01	10/18862	0.0168404	0.121673	0.0822631	967	1
BP	GO:0090209	negative regulation of triglyceride metabolic process	1932-01-01	10/18862	0.0168404	0.121673	0.0822631	6653	1
BP	GO:0099151	regulation of postsynaptic density assembly	1932-01-01	10/18862	0.0168404	0.121673	0.0822631	5802	1
BP	GO:1902946	protein localization to early endosome	1932-01-01	10/18862	0.0168404	0.121673	0.0822631	6653	1
BP	GO:1902959	regulation of aspartic-type endopeptidase activity involved in amyloid precursor protein catabolic process	1932-01-01	10/18862	0.0168404	0.121673	0.0822631	6653	1
BP	GO:0051101	regulation of DNA binding	1932-02-01	118/18862	0.0170309	0.121673	0.0822631	11315/3670	2
BP	GO:0000184	nuclear-transcribed mRNA catabolic process, nonsense-mediated decay	1932-02-01	120/18862	0.0175787	0.121673	0.0822631	23293/6209	2
BP	GO:0010508	positive regulation of autophagy	1932-02-01	120/18862	0.0175787	0.121673	0.0822631	11315/2308	2
BP	GO:0032147	activation of protein kinase activity	1932-03-01	328/18862	0.0178056	0.121673	0.0822631	197259/11315/1946	3
BP	GO:1904951	positive regulation of establishment of protein localization	1932-03-01	328/18862	0.0178056	0.121673	0.0822631	6653/846/3670	3
BP	GO:0048545	response to steroid hormone	1932-03-01	330/18862	0.0180931	0.121673	0.0822631	11315/2308/3670	3
BP	GO:1903409	reactive oxygen species biosynthetic process	1932-02-01	123/18862	0.0184143	0.121673	0.0822631	11315/4513	2
BP	GO:0003139	secondary heart field specification	1932-01-01	11/18862	0.0185092	0.121673	0.0822631	3670	1
BP	GO:0021559	trigeminal nerve development	1932-01-01	11/18862	0.0185092	0.121673	0.0822631	3670	1
BP	GO:0032610	interleukin-1 alpha production	1932-01-01	11/18862	0.0185092	0.121673	0.0822631	3670	1
BP	GO:0033234	negative regulation of protein sumoylation	1932-01-01	11/18862	0.0185092	0.121673	0.0822631	11315	1
BP	GO:0034163	regulation of toll-like receptor 9 signaling pathway	1932-01-01	11/18862	0.0185092	0.121673	0.0822631	5802	1
BP	GO:0042416	dopamine biosynthetic process	1932-01-01	11/18862	0.0185092	0.121673	0.0822631	11315	1
BP	GO:0060379	cardiac muscle cell myoblast differentiation	1932-01-01	11/18862	0.0185092	0.121673	0.0822631	3670	1
BP	GO:0090084	negative regulation of inclusion body assembly	1932-01-01	11/18862	0.0185092	0.121673	0.0822631	6653	1
BP	GO:0099150	regulation of postsynaptic specialization assembly	1932-01-01	11/18862	0.0185092	0.121673	0.0822631	5802	1
BP	GO:1901298	regulation of hydrogen peroxide-mediated programmed cell death	1932-01-01	11/18862	0.0185092	0.121673	0.0822631	11315	1
BP	GO:0046887	positive regulation of hormone secretion	1932-02-01	124/18862	0.0186966	0.121673	0.0822631	846/3670	2
BP	GO:0045471	response to ethanol	1932-02-01	126/18862	0.0192666	0.121673	0.0822631	4519/4538	2
BP	GO:0071333	cellular response to glucose stimulus	1932-02-01	127/18862	0.0195544	0.121673	0.0822631	1946/846	2
BP	GO:0006913	nucleocytoplasmic transport	1932-03-01	340/18862	0.0195695	0.121673	0.0822631	23293/11315/6209	3
BP	GO:0070997	neuron death	1932-03-01	342/18862	0.0198726	0.121673	0.0822631	11315/6653/3670	3
BP	GO:0051169	nuclear transport	1932-03-01	343/18862	0.0200251	0.121673	0.0822631	23293/11315/6209	3
BP	GO:0050714	positive regulation of protein secretion	1932-02-01	129/18862	0.0201353	0.121673	0.0822631	846/3670	2
BP	GO:0071331	cellular response to hexose stimulus	1932-02-01	129/18862	0.0201353	0.121673	0.0822631	1946/846	2
BP	GO:0002863	positive regulation of inflammatory response to antigenic stimulus	1932-01-01	12/18862	0.0201753	0.121673	0.0822631	11315	1
BP	GO:0032782	bile acid secretion	1932-01-01	12/18862	0.0201753	0.121673	0.0822631	846	1
BP	GO:0033182	regulation of histone ubiquitination	1932-01-01	12/18862	0.0201753	0.121673	0.0822631	11315	1
BP	GO:0036462	TRAIL-activated apoptotic signaling pathway	1932-01-01	12/18862	0.0201753	0.121673	0.0822631	11315	1
BP	GO:0042538	hyperosmotic salinity response	1932-01-01	12/18862	0.0201753	0.121673	0.0822631	4519	1
BP	GO:0043476	pigment accumulation	1932-01-01	12/18862	0.0201753	0.121673	0.0822631	967	1
BP	GO:0043482	cellular pigment accumulation	1932-01-01	12/18862	0.0201753	0.121673	0.0822631	967	1
BP	GO:0046185	aldehyde catabolic process	1932-01-01	12/18862	0.0201753	0.121673	0.0822631	11315	1
BP	GO:0048934	peripheral nervous system neuron differentiation	1932-01-01	12/18862	0.0201753	0.121673	0.0822631	3670	1
BP	GO:0048935	peripheral nervous system neuron development	1932-01-01	12/18862	0.0201753	0.121673	0.0822631	3670	1
BP	GO:0051583	dopamine uptake involved in synaptic transmission	1932-01-01	12/18862	0.0201753	0.121673	0.0822631	11315	1
BP	GO:0051934	catecholamine uptake involved in synaptic transmission	1932-01-01	12/18862	0.0201753	0.121673	0.0822631	11315	1
BP	GO:0061000	negative regulation of dendritic spine development	1932-01-01	12/18862	0.0201753	0.121673	0.0822631	5802	1
BP	GO:0090085	regulation of protein deubiquitination	1932-01-01	12/18862	0.0201753	0.121673	0.0822631	11315	1
BP	GO:0090557	establishment of endothelial intestinal barrier	1932-01-01	12/18862	0.0201753	0.121673	0.0822631	5802	1
BP	GO:0110096	cellular response to aldehyde	1932-01-01	12/18862	0.0201753	0.121673	0.0822631	11315	1
BP	GO:1905245	regulation of aspartic-type peptidase activity	1932-01-01	12/18862	0.0201753	0.121673	0.0822631	6653	1
BP	GO:1905668	positive regulation of protein localization to endosome	1932-01-01	12/18862	0.0201753	0.121673	0.0822631	6653	1
BP	GO:2001135	regulation of endocytic recycling	1932-01-01	12/18862	0.0201753	0.121673	0.0822631	6653	1
BP	GO:2001171	positive regulation of ATP biosynthetic process	1932-01-01	12/18862	0.0201753	0.121673	0.0822631	4513	1
BP	GO:0071326	cellular response to monosaccharide stimulus	1932-02-01	130/18862	0.0204285	0.121673	0.0822631	1946/846	2
BP	GO:0071426	ribonucleoprotein complex export from nucleus	1932-02-01	130/18862	0.0204285	0.121673	0.0822631	23293/6209	2
BP	GO:0045861	negative regulation of proteolysis	1932-03-01	346/18862	0.0204867	0.121673	0.0822631	11315/6653/27344	3
BP	GO:0062197	cellular response to chemical stress	1932-03-01	347/18862	0.0206418	0.121673	0.0822631	11315/2308/10202	3
BP	GO:0071166	ribonucleoprotein complex localization	1932-02-01	131/18862	0.0207235	0.121673	0.0822631	23293/6209	2
BP	GO:0001666	response to hypoxia	1932-03-01	348/18862	0.0207976	0.121673	0.0822631	846/4519/4538	3
BP	GO:0050768	negative regulation of neurogenesis	1932-02-01	133/18862	0.0213189	0.121673	0.0822631	6653/5802	2
BP	GO:0010038	response to metal ion	1932-03-01	352/18862	0.0214274	0.121673	0.0822631	11315/846/4519	3
BP	GO:0008584	male gonad development	1932-02-01	134/18862	0.0216192	0.121673	0.0822631	4678/22836	2
BP	GO:0043401	steroid hormone mediated signaling pathway	1932-02-01	134/18862	0.0216192	0.121673	0.0822631	11315/3670	2
BP	GO:0003161	cardiac conduction system development	1932-01-01	13/18862	0.0218387	0.121673	0.0822631	3670	1
BP	GO:0005513	detection of calcium ion	1932-01-01	13/18862	0.0218387	0.121673	0.0822631	846	1
BP	GO:0007171	activation of transmembrane receptor protein tyrosine kinase activity	1932-01-01	13/18862	0.0218387	0.121673	0.0822631	1946	1
BP	GO:0010421	hydrogen peroxide-mediated programmed cell death	1932-01-01	13/18862	0.0218387	0.121673	0.0822631	11315	1
BP	GO:0014745	negative regulation of muscle adaptation	1932-01-01	13/18862	0.0218387	0.121673	0.0822631	2308	1
BP	GO:0032725	positive regulation of granulocyte macrophage colony-stimulating factor production	1932-01-01	13/18862	0.0218387	0.121673	0.0822631	3670	1
BP	GO:0034309	primary alcohol biosynthetic process	1932-01-01	13/18862	0.0218387	0.121673	0.0822631	11315	1
BP	GO:0042182	ketone catabolic process	1932-01-01	13/18862	0.0218387	0.121673	0.0822631	11315	1
BP	GO:0042415	norepinephrine metabolic process	1932-01-01	13/18862	0.0218387	0.121673	0.0822631	3642	1
BP	GO:0060911	cardiac cell fate commitment	1932-01-01	13/18862	0.0218387	0.121673	0.0822631	3670	1
BP	GO:1902947	regulation of tau-protein kinase activity	1932-01-01	13/18862	0.0218387	0.121673	0.0822631	6653	1
BP	GO:1903651	positive regulation of cytoplasmic transport	1932-01-01	13/18862	0.0218387	0.121673	0.0822631	6653	1
BP	GO:1904889	regulation of excitatory synapse assembly	1932-01-01	13/18862	0.0218387	0.121673	0.0822631	5802	1
BP	GO:1905666	regulation of protein localization to endosome	1932-01-01	13/18862	0.0218387	0.121673	0.0822631	6653	1
BP	GO:0042542	response to hydrogen peroxide	1932-02-01	135/18862	0.0219214	0.121673	0.0822631	11315/2308	2
BP	GO:0043524	negative regulation of neuron apoptotic process	1932-02-01	135/18862	0.0219214	0.121673	0.0822631	11315/3670	2
BP	GO:0046546	development of primary male sexual characteristics	1932-02-01	135/18862	0.0219214	0.121673	0.0822631	4678/22836	2
BP	GO:0051384	response to glucocorticoid	1932-02-01	135/18862	0.0219214	0.121673	0.0822631	2308/3670	2
BP	GO:0051098	regulation of binding	1932-03-01	357/18862	0.0222295	0.121673	0.0822631	11315/6653/3670	3
BP	GO:0042493	response to drug	1932-03-01	359/18862	0.0225549	0.121673	0.0822631	4860/4535/4519	3
BP	GO:0036293	response to decreased oxygen levels	1932-03-01	360/18862	0.0227185	0.121673	0.0822631	846/4519/4538	3
BP	GO:0051961	negative regulation of nervous system development	1932-02-01	138/18862	0.0228383	0.121673	0.0822631	6653/5802	2
BP	GO:0071322	cellular response to carbohydrate stimulus	1932-02-01	138/18862	0.0228383	0.121673	0.0822631	1946/846	2
BP	GO:0001933	negative regulation of protein phosphorylation	1932-03-01	362/18862	0.0230479	0.121673	0.0822631	11315/6653/3642	3
BP	GO:0030902	hindbrain development	1932-02-01	139/18862	0.0231475	0.121673	0.0822631	5802/4538	2
BP	GO:0000054	ribosomal subunit export from nucleus	1932-01-01	14/18862	0.0234993	0.121673	0.0822631	6209	1
BP	GO:0002864	regulation of acute inflammatory response to antigenic stimulus	1932-01-01	14/18862	0.0234993	0.121673	0.0822631	11315	1
BP	GO:0006122	mitochondrial electron transport, ubiquinol to cytochrome c	1932-01-01	14/18862	0.0234993	0.121673	0.0822631	4519	1
BP	GO:0007635	chemosensory behavior	1932-01-01	14/18862	0.0234993	0.121673	0.0822631	846	1
BP	GO:0010771	negative regulation of cell morphogenesis involved in differentiation	1932-01-01	14/18862	0.0234993	0.121673	0.0822631	1946	1
BP	GO:0010896	regulation of triglyceride catabolic process	1932-01-01	14/18862	0.0234993	0.121673	0.0822631	6653	1
BP	GO:0032688	negative regulation of interferon-beta production	1932-01-01	14/18862	0.0234993	0.121673	0.0822631	5802	1
BP	GO:0033147	negative regulation of intracellular estrogen receptor signaling pathway	1932-01-01	14/18862	0.0234993	0.121673	0.0822631	3670	1
BP	GO:0033750	ribosome localization	1932-01-01	14/18862	0.0234993	0.121673	0.0822631	6209	1
BP	GO:0036295	cellular response to increased oxygen levels	1932-01-01	14/18862	0.0234993	0.121673	0.0822631	2308	1
BP	GO:0046415	urate metabolic process	1932-01-01	14/18862	0.0234993	0.121673	0.0822631	4860	1
BP	GO:0048681	negative regulation of axon regeneration	1932-01-01	14/18862	0.0234993	0.121673	0.0822631	5802	1
BP	GO:0060081	membrane hyperpolarization	1932-01-01	14/18862	0.0234993	0.121673	0.0822631	11315	1
BP	GO:0097468	programmed cell death in response to reactive oxygen species	1932-01-01	14/18862	0.0234993	0.121673	0.0822631	11315	1
BP	GO:1900025	negative regulation of substrate adhesion-dependent cell spreading	1932-01-01	14/18862	0.0234993	0.121673	0.0822631	1946	1
BP	GO:1905049	negative regulation of metallopeptidase activity	1932-01-01	14/18862	0.0234993	0.121673	0.0822631	6653	1
BP	GO:1905874	regulation of postsynaptic density organization	1932-01-01	14/18862	0.0234993	0.121673	0.0822631	5802	1
BP	GO:0031056	regulation of histone modification	1932-02-01	141/18862	0.023771	0.121673	0.0822631	11315/3670	2
BP	GO:0062013	positive regulation of small molecule metabolic process	1932-02-01	141/18862	0.023771	0.121673	0.0822631	11315/4513	2
BP	GO:0006405	RNA export from nucleus	1932-02-01	142/18862	0.0240854	0.121673	0.0822631	23293/6209	2
BP	GO:0008286	insulin receptor signaling pathway	1932-02-01	143/18862	0.0244015	0.121673	0.0822631	6653/2308	2
BP	GO:0006334	nucleosome assembly	1932-02-01	145/18862	0.0250388	0.121673	0.0822631	4678/6046	2
BP	GO:0051592	response to calcium ion	1932-02-01	145/18862	0.0250388	0.121673	0.0822631	846/4519	2
BP	GO:0006089	lactate metabolic process	1932-01-01	15/18862	0.0251572	0.121673	0.0822631	11315	1
BP	GO:0010273	detoxification of copper ion	1932-01-01	15/18862	0.0251572	0.121673	0.0822631	11315	1
BP	GO:0010940	positive regulation of necrotic cell death	1932-01-01	15/18862	0.0251572	0.121673	0.0822631	4513	1
BP	GO:0015936	coenzyme A metabolic process	1932-01-01	15/18862	0.0251572	0.121673	0.0822631	64087	1
BP	GO:0022038	corpus callosum development	1932-01-01	15/18862	0.0251572	0.121673	0.0822631	5802	1
BP	GO:0032645	regulation of granulocyte macrophage colony-stimulating factor production	1932-01-01	15/18862	0.0251572	0.121673	0.0822631	3670	1
BP	GO:0042053	regulation of dopamine metabolic process	1932-01-01	15/18862	0.0251572	0.121673	0.0822631	11315	1
BP	GO:0042069	regulation of catecholamine metabolic process	1932-01-01	15/18862	0.0251572	0.121673	0.0822631	11315	1
BP	GO:0043101	purine-containing compound salvage	1932-01-01	15/18862	0.0251572	0.121673	0.0822631	4860	1
BP	GO:0060339	negative regulation of type I interferon-mediated signaling pathway	1932-01-01	15/18862	0.0251572	0.121673	0.0822631	23170	1
BP	GO:0060413	atrial septum morphogenesis	1932-01-01	15/18862	0.0251572	0.121673	0.0822631	3670	1
BP	GO:0060628	regulation of ER to Golgi vesicle-mediated transport	1932-01-01	15/18862	0.0251572	0.121673	0.0822631	6653	1
BP	GO:0070207	protein homotrimerization	1932-01-01	15/18862	0.0251572	0.121673	0.0822631	197259	1
BP	GO:0070571	negative regulation of neuron projection regeneration	1932-01-01	15/18862	0.0251572	0.121673	0.0822631	5802	1
BP	GO:0071380	cellular response to prostaglandin E stimulus	1932-01-01	15/18862	0.0251572	0.121673	0.0822631	54331	1
BP	GO:0071428	rRNA-containing ribonucleoprotein complex export from nucleus	1932-01-01	15/18862	0.0251572	0.121673	0.0822631	6209	1
BP	GO:0071732	cellular response to nitric oxide	1932-01-01	15/18862	0.0251572	0.121673	0.0822631	2308	1
BP	GO:1990169	stress response to copper ion	1932-01-01	15/18862	0.0251572	0.121673	0.0822631	11315	1
BP	GO:2000136	regulation of cell proliferation involved in heart morphogenesis	1932-01-01	15/18862	0.0251572	0.121673	0.0822631	3670	1
BP	GO:2001044	regulation of integrin-mediated signaling pathway	1932-01-01	15/18862	0.0251572	0.121673	0.0822631	967	1
BP	GO:0042176	regulation of protein catabolic process	1932-03-01	383/18862	0.0266645	0.12357	0.0835458	11315/6653/2308	3
BP	GO:0032604	granulocyte macrophage colony-stimulating factor production	1932-01-01	16/18862	0.0268124	0.12357	0.0835458	3670	1
BP	GO:0035729	cellular response to hepatocyte growth factor stimulus	1932-01-01	16/18862	0.0268124	0.12357	0.0835458	846	1
BP	GO:0051238	sequestering of metal ion	1932-01-01	16/18862	0.0268124	0.12357	0.0835458	2512	1
BP	GO:0051444	negative regulation of ubiquitin-protein transferase activity	1932-01-01	16/18862	0.0268124	0.12357	0.0835458	11315	1
BP	GO:0061323	cell proliferation involved in heart morphogenesis	1932-01-01	16/18862	0.0268124	0.12357	0.0835458	3670	1
BP	GO:0061548	ganglion development	1932-01-01	16/18862	0.0268124	0.12357	0.0835458	3642	1
BP	GO:0070166	enamel mineralization	1932-01-01	16/18862	0.0268124	0.12357	0.0835458	2308	1
BP	GO:0070863	positive regulation of protein exit from endoplasmic reticulum	1932-01-01	16/18862	0.0268124	0.12357	0.0835458	6653	1
BP	GO:0090083	regulation of inclusion body assembly	1932-01-01	16/18862	0.0268124	0.12357	0.0835458	6653	1
BP	GO:1903204	negative regulation of oxidative stress-induced neuron death	1932-01-01	16/18862	0.0268124	0.12357	0.0835458	11315	1
BP	GO:1903209	positive regulation of oxidative stress-induced cell death	1932-01-01	16/18862	0.0268124	0.12357	0.0835458	11315	1
BP	GO:1904683	regulation of metalloendopeptidase activity	1932-01-01	16/18862	0.0268124	0.12357	0.0835458	6653	1
BP	GO:0002793	positive regulation of peptide secretion	1932-02-01	151/18862	0.0269914	0.123946	0.0837999	846/3670	2
BP	GO:0031960	response to corticosteroid	1932-02-01	152/18862	0.0273227	0.123997	0.0838348	2308/3670	2
BP	GO:0016573	histone acetylation	1932-02-01	153/18862	0.0276556	0.123997	0.0838348	11315/3670	2
BP	GO:0046661	male sex differentiation	1932-02-01	153/18862	0.0276556	0.123997	0.0838348	4678/22836	2
BP	GO:0018205	peptidyl-lysine modification	1932-03-01	391/18862	0.0281185	0.123997	0.0838348	11315/23170/3670	3
BP	GO:1901653	cellular response to peptide	1932-03-01	391/18862	0.0281185	0.123997	0.0838348	6653/846/2308	3
BP	GO:0010612	regulation of cardiac muscle adaptation	1932-01-01	17/18862	0.0284648	0.123997	0.0838348	2308	1
BP	GO:0033194	response to hydroperoxide	1932-01-01	17/18862	0.0284648	0.123997	0.0838348	4535	1
BP	GO:0048670	regulation of collateral sprouting	1932-01-01	17/18862	0.0284648	0.123997	0.0838348	5802	1
BP	GO:0050665	hydrogen peroxide biosynthetic process	1932-01-01	17/18862	0.0284648	0.123997	0.0838348	4513	1
BP	GO:0061687	detoxification of inorganic compound	1932-01-01	17/18862	0.0284648	0.123997	0.0838348	11315	1
BP	GO:0070206	protein trimerization	1932-01-01	17/18862	0.0284648	0.123997	0.0838348	197259	1
BP	GO:0090494	dopamine uptake	1932-01-01	17/18862	0.0284648	0.123997	0.0838348	11315	1
BP	GO:1902170	cellular response to reactive nitrogen species	1932-01-01	17/18862	0.0284648	0.123997	0.0838348	2308	1
BP	GO:1903242	regulation of cardiac muscle hypertrophy in response to stress	1932-01-01	17/18862	0.0284648	0.123997	0.0838348	2308	1
BP	GO:2001267	regulation of cysteine-type endopeptidase activity involved in apoptotic signaling pathway	1932-01-01	17/18862	0.0284648	0.123997	0.0838348	11315	1
BP	GO:0032102	negative regulation of response to external stimulus	1932-03-01	394/18862	0.0286745	0.124485	0.0841641	23170/5802/3670	3
BP	GO:0018393	internal peptidyl-lysine acetylation	1932-02-01	158/18862	0.0293451	0.126006	0.0851925	11315/3670	2
BP	GO:0044106	cellular amine metabolic process	1932-02-01	158/18862	0.0293451	0.126006	0.0851925	11315/3642	2
BP	GO:0034614	cellular response to reactive oxygen species	1932-02-01	159/18862	0.0296879	0.126006	0.0851925	11315/2308	2
BP	GO:0051100	negative regulation of binding	1932-02-01	159/18862	0.0296879	0.126006	0.0851925	11315/6653	2
BP	GO:0006475	internal protein amino acid acetylation	1932-02-01	160/18862	0.0300323	0.126006	0.0851925	11315/3670	2
BP	GO:0003128	heart field specification	1932-01-01	18/18862	0.0301146	0.126006	0.0851925	3670	1
BP	GO:0035728	response to hepatocyte growth factor	1932-01-01	18/18862	0.0301146	0.126006	0.0851925	846	1
BP	GO:0090493	catecholamine uptake	1932-01-01	18/18862	0.0301146	0.126006	0.0851925	11315	1
BP	GO:0097107	postsynaptic density assembly	1932-01-01	18/18862	0.0301146	0.126006	0.0851925	5802	1
BP	GO:0097501	stress response to metal ion	1932-01-01	18/18862	0.0301146	0.126006	0.0851925	11315	1
BP	GO:1902236	negative regulation of endoplasmic reticulum stress-induced intrinsic apoptotic signaling pathway	1932-01-01	18/18862	0.0301146	0.126006	0.0851925	11315	1
BP	GO:0009308	amine metabolic process	1932-02-01	163/18862	0.0310751	0.129495	0.0875518	11315/3642	2
BP	GO:0042326	negative regulation of phosphorylation	1932-03-01	407/18862	0.0311522	0.129495	0.0875518	11315/6653/3642	3
BP	GO:0009150	purine ribonucleotide metabolic process	1932-03-01	408/18862	0.0313473	0.129882	0.0878134	64087/4509/4513	3
BP	GO:0010002	cardioblast differentiation	1932-01-01	19/18862	0.0317616	0.129974	0.0878756	3670	1
BP	GO:0031290	retinal ganglion cell axon guidance	1932-01-01	19/18862	0.0317616	0.129974	0.0878756	3670	1
BP	GO:0071731	response to nitric oxide	1932-01-01	19/18862	0.0317616	0.129974	0.0878756	2308	1
BP	GO:0007584	response to nutrient	1932-02-01	165/18862	0.0317783	0.129974	0.0878756	846/4519	2
BP	GO:0016482	cytosolic transport	1932-02-01	166/18862	0.0321322	0.130344	0.0881259	6653/22836	2
BP	GO:0048732	gland development	1932-03-01	413/18862	0.032333	0.130344	0.0881259	4513/3642/3670	3
BP	GO:0018394	peptidyl-lysine acetylation	1932-02-01	168/18862	0.0328449	0.130344	0.0881259	11315/3670	2
BP	GO:0043112	receptor metabolic process	1932-02-01	168/18862	0.0328449	0.130344	0.0881259	967/6653	2
BP	GO:0003215	cardiac right ventricle morphogenesis	1932-01-01	20/18862	0.0334059	0.130344	0.0881259	3670	1
BP	GO:0003323	type B pancreatic cell development	1932-01-01	20/18862	0.0334059	0.130344	0.0881259	3642	1
BP	GO:0009083	branched-chain amino acid catabolic process	1932-01-01	20/18862	0.0334059	0.130344	0.0881259	64087	1
BP	GO:0010310	regulation of hydrogen peroxide metabolic process	1932-01-01	20/18862	0.0334059	0.130344	0.0881259	4513	1
BP	GO:0043011	myeloid dendritic cell differentiation	1932-01-01	20/18862	0.0334059	0.130344	0.0881259	10202	1
BP	GO:0046823	negative regulation of nucleocytoplasmic transport	1932-01-01	20/18862	0.0334059	0.130344	0.0881259	11315	1
BP	GO:0060563	neuroepithelial cell differentiation	1932-01-01	20/18862	0.0334059	0.130344	0.0881259	3642	1
BP	GO:0071379	cellular response to prostaglandin stimulus	1932-01-01	20/18862	0.0334059	0.130344	0.0881259	54331	1
BP	GO:0090280	positive regulation of calcium ion import	1932-01-01	20/18862	0.0334059	0.130344	0.0881259	846	1
BP	GO:1902176	negative regulation of oxidative stress-induced intrinsic apoptotic signaling pathway	1932-01-01	20/18862	0.0334059	0.130344	0.0881259	11315	1
BP	GO:1903206	negative regulation of hydrogen peroxide-induced cell death	1932-01-01	20/18862	0.0334059	0.130344	0.0881259	11315	1
BP	GO:0051099	positive regulation of binding	1932-02-01	170/18862	0.0335638	0.13056	0.0882718	11315/3670	2
BP	GO:0009259	ribonucleotide metabolic process	1932-03-01	425/18862	0.0347649	0.13268	0.0897048	64087/4509/4513	3
BP	GO:0052548	regulation of endopeptidase activity	1932-03-01	426/18862	0.0349718	0.13268	0.0897048	11315/6653/27344	3
BP	GO:0000028	ribosomal small subunit assembly	1932-01-01	21/18862	0.0350475	0.13268	0.0897048	6209	1
BP	GO:0006123	mitochondrial electron transport, cytochrome c to oxygen	1932-01-01	21/18862	0.0350475	0.13268	0.0897048	4513	1
BP	GO:0019646	aerobic electron transport chain	1932-01-01	21/18862	0.0350475	0.13268	0.0897048	4513	1
BP	GO:0030325	adrenal gland development	1932-01-01	21/18862	0.0350475	0.13268	0.0897048	3642	1
BP	GO:0048485	sympathetic nervous system development	1932-01-01	21/18862	0.0350475	0.13268	0.0897048	3642	1
BP	GO:0098698	postsynaptic specialization assembly	1932-01-01	21/18862	0.0350475	0.13268	0.0897048	5802	1
BP	GO:2001169	regulation of ATP biosynthetic process	1932-01-01	21/18862	0.0350475	0.13268	0.0897048	4513	1
BP	GO:0009152	purine ribonucleotide biosynthetic process	1932-02-01	175/18862	0.0353881	0.133572	0.0903079	4509/4513	2
BP	GO:0044282	small molecule catabolic process	1932-03-01	431/18862	0.036016	0.133771	0.090443	11315/4860/64087	3
BP	GO:0003283	atrial septum development	1932-01-01	22/18862	0.0366864	0.133771	0.090443	3670	1
BP	GO:0030810	positive regulation of nucleotide biosynthetic process	1932-01-01	22/18862	0.0366864	0.133771	0.090443	4513	1
BP	GO:0042776	mitochondrial ATP synthesis coupled proton transport	1932-01-01	22/18862	0.0366864	0.133771	0.090443	4509	1
BP	GO:0071305	cellular response to vitamin D	1932-01-01	22/18862	0.0366864	0.133771	0.090443	846	1
BP	GO:0071404	cellular response to low-density lipoprotein particle stimulus	1932-01-01	22/18862	0.0366864	0.133771	0.090443	846	1
BP	GO:1900373	positive regulation of purine nucleotide biosynthetic process	1932-01-01	22/18862	0.0366864	0.133771	0.090443	4513	1
BP	GO:1901032	negative regulation of response to reactive oxygen species	1932-01-01	22/18862	0.0366864	0.133771	0.090443	11315	1
BP	GO:1903203	regulation of oxidative stress-induced neuron death	1932-01-01	22/18862	0.0366864	0.133771	0.090443	11315	1
BP	GO:0019693	ribose phosphate metabolic process	1932-03-01	435/18862	0.036863	0.133771	0.090443	64087/4509/4513	3
BP	GO:0043434	response to peptide hormone	1932-03-01	435/18862	0.036863	0.133771	0.090443	6653/2308/4519	3
BP	GO:0001819	positive regulation of cytokine production	1932-03-01	437/18862	0.0372904	0.133771	0.090443	11315/6653/3670	3
BP	GO:0043409	negative regulation of MAPK cascade	1932-02-01	181/18862	0.0376273	0.133771	0.090443	6653/2308	2
BP	GO:0002438	acute inflammatory response to antigenic stimulus	1932-01-01	23/18862	0.0383226	0.133771	0.090443	11315	1
BP	GO:0006622	protein targeting to lysosome	1932-01-01	23/18862	0.0383226	0.133771	0.090443	6653	1
BP	GO:0009081	branched-chain amino acid metabolic process	1932-01-01	23/18862	0.0383226	0.133771	0.090443	64087	1
BP	GO:0010155	regulation of proton transport	1932-01-01	23/18862	0.0383226	0.133771	0.090443	11315	1
BP	GO:0034505	tooth mineralization	1932-01-01	23/18862	0.0383226	0.133771	0.090443	2308	1
BP	GO:0034695	response to prostaglandin E	1932-01-01	23/18862	0.0383226	0.133771	0.090443	54331	1
BP	GO:0046628	positive regulation of insulin receptor signaling pathway	1932-01-01	23/18862	0.0383226	0.133771	0.090443	6653	1
BP	GO:0048668	collateral sprouting	1932-01-01	23/18862	0.0383226	0.133771	0.090443	5802	1
BP	GO:0051349	positive regulation of lyase activity	1932-01-01	23/18862	0.0383226	0.133771	0.090443	11315	1
BP	GO:0051457	maintenance of protein location in nucleus	1932-01-01	23/18862	0.0383226	0.133771	0.090443	11315	1
BP	GO:0060384	innervation	1932-01-01	23/18862	0.0383226	0.133771	0.090443	3670	1
BP	GO:0070841	inclusion body assembly	1932-01-01	23/18862	0.0383226	0.133771	0.090443	6653	1
BP	GO:0097186	amelogenesis	1932-01-01	23/18862	0.0383226	0.133771	0.090443	2308	1
BP	GO:1901984	negative regulation of protein acetylation	1932-01-01	23/18862	0.0383226	0.133771	0.090443	11315	1
BP	GO:0034728	nucleosome organization	1932-02-01	183/18862	0.0383857	0.133771	0.090443	4678/6046	2
BP	GO:0009749	response to glucose	1932-02-01	185/18862	0.0391499	0.135151	0.0913759	1946/846	2
BP	GO:1902275	regulation of chromatin organization	1932-02-01	185/18862	0.0391499	0.135151	0.0913759	11315/3670	2
BP	GO:0016570	histone modification	1932-03-01	448/18862	0.0396871	0.135151	0.0913759	11315/23170/3670	3
BP	GO:0001963	synaptic transmission, dopaminergic	1932-01-01	24/18862	0.0399561	0.135151	0.0913759	11315	1
BP	GO:0003309	type B pancreatic cell differentiation	1932-01-01	24/18862	0.0399561	0.135151	0.0913759	3642	1
BP	GO:0042454	ribonucleoside catabolic process	1932-01-01	24/18862	0.0399561	0.135151	0.0913759	4860	1
BP	GO:0060037	pharyngeal system development	1932-01-01	24/18862	0.0399561	0.135151	0.0913759	3670	1
BP	GO:0009896	positive regulation of catabolic process	1932-03-01	450/18862	0.0401312	0.135151	0.0913759	11315/6653/2308	3
BP	GO:0009260	ribonucleotide biosynthetic process	1932-02-01	188/18862	0.0403073	0.135151	0.0913759	4509/4513	2
BP	GO:0007254	JNK cascade	1932-02-01	189/18862	0.0406959	0.135151	0.0913759	197259/846	2
BP	GO:0009746	response to hexose	1932-02-01	190/18862	0.0410861	0.135151	0.0913759	1946/846	2
BP	GO:0052547	regulation of peptidase activity	1932-03-01	455/18862	0.0412527	0.135151	0.0913759	11315/6653/27344	3
BP	GO:0051346	negative regulation of hydrolase activity	1932-03-01	456/18862	0.0414789	0.135151	0.0913759	11315/6653/27344	3
BP	GO:0002068	glandular epithelial cell development	1932-01-01	25/18862	0.0415869	0.135151	0.0913759	3642	1
BP	GO:0002092	positive regulation of receptor internalization	1932-01-01	25/18862	0.0415869	0.135151	0.0913759	967	1
BP	GO:0003148	outflow tract septum morphogenesis	1932-01-01	25/18862	0.0415869	0.135151	0.0913759	3670	1
BP	GO:0033233	regulation of protein sumoylation	1932-01-01	25/18862	0.0415869	0.135151	0.0913759	11315	1
BP	GO:0036010	protein localization to endosome	1932-01-01	25/18862	0.0415869	0.135151	0.0913759	6653	1
BP	GO:0050927	positive regulation of positive chemotaxis	1932-01-01	25/18862	0.0415869	0.135151	0.0913759	846	1
BP	GO:0050995	negative regulation of lipid catabolic process	1932-01-01	25/18862	0.0415869	0.135151	0.0913759	6653	1
BP	GO:0060765	regulation of androgen receptor signaling pathway	1932-01-01	25/18862	0.0415869	0.135151	0.0913759	11315	1
BP	GO:0099560	synaptic membrane adhesion	1932-01-01	25/18862	0.0415869	0.135151	0.0913759	5802	1
BP	GO:1900078	positive regulation of cellular response to insulin stimulus	1932-01-01	25/18862	0.0415869	0.135151	0.0913759	6653	1
BP	GO:1905048	regulation of metallopeptidase activity	1932-01-01	25/18862	0.0415869	0.135151	0.0913759	6653	1
BP	GO:2000679	positive regulation of transcription regulatory region DNA binding	1932-01-01	25/18862	0.0415869	0.135151	0.0913759	11315	1
BP	GO:2000377	regulation of reactive oxygen species metabolic process	1932-02-01	192/18862	0.0418706	0.135151	0.0913759	11315/4513	2
BP	GO:0009755	hormone-mediated signaling pathway	1932-02-01	193/18862	0.042265	0.135151	0.0913759	11315/3670	2
BP	GO:0050731	positive regulation of peptidyl-tyrosine phosphorylation	1932-02-01	193/18862	0.042265	0.135151	0.0913759	1946/3670	2
BP	GO:0007409	axonogenesis	1932-03-01	460/18862	0.0423902	0.135151	0.0913759	1946/5802/3670	3
BP	GO:0016569	covalent chromatin modification	1932-03-01	461/18862	0.0426196	0.135151	0.0913759	11315/23170/3670	3
BP	GO:0046390	ribose phosphate biosynthetic process	1932-02-01	195/18862	0.043058	0.135151	0.0913759	4509/4513	2
BP	GO:1901888	regulation of cell junction assembly	1932-02-01	195/18862	0.043058	0.135151	0.0913759	1946/5802	2
BP	GO:0006972	hyperosmotic response	1932-01-01	26/18862	0.043215	0.135151	0.0913759	4519	1
BP	GO:0009651	response to salt stress	1932-01-01	26/18862	0.043215	0.135151	0.0913759	4519	1
BP	GO:0034162	toll-like receptor 9 signaling pathway	1932-01-01	26/18862	0.043215	0.135151	0.0913759	5802	1
BP	GO:0036475	neuron death in response to oxidative stress	1932-01-01	26/18862	0.043215	0.135151	0.0913759	11315	1
BP	GO:0050926	regulation of positive chemotaxis	1932-01-01	26/18862	0.043215	0.135151	0.0913759	846	1
BP	GO:1900746	regulation of vascular endothelial growth factor signaling pathway	1932-01-01	26/18862	0.043215	0.135151	0.0913759	967	1
BP	GO:1903205	regulation of hydrogen peroxide-induced cell death	1932-01-01	26/18862	0.043215	0.135151	0.0913759	11315	1
BP	GO:1904353	regulation of telomere capping	1932-01-01	26/18862	0.043215	0.135151	0.0913759	23293	1
BP	GO:1904861	excitatory synapse assembly	1932-01-01	26/18862	0.043215	0.135151	0.0913759	5802	1
BP	GO:0031497	chromatin assembly	1932-02-01	196/18862	0.0434567	0.135151	0.0913759	4678/6046	2
BP	GO:0034284	response to monosaccharide	1932-02-01	196/18862	0.0434567	0.135151	0.0913759	1946/846	2
BP	GO:0043393	regulation of protein binding	1932-02-01	196/18862	0.0434567	0.135151	0.0913759	11315/6653	2
BP	GO:0006164	purine nucleotide biosynthetic process	1932-02-01	197/18862	0.0438567	0.135732	0.0917683	4509/4513	2
BP	GO:0043523	regulation of neuron apoptotic process	1932-02-01	197/18862	0.0438567	0.135732	0.0917683	11315/3670	2
BP	GO:0050657	nucleic acid transport	1932-02-01	198/18862	0.0442581	0.135803	0.0918163	23293/6209	2
BP	GO:0050658	RNA transport	1932-02-01	198/18862	0.0442581	0.135803	0.0918163	23293/6209	2
BP	GO:0002675	positive regulation of acute inflammatory response	1932-01-01	27/18862	0.0448405	0.135803	0.0918163	11315	1
BP	GO:0015985	energy coupled proton transport, down electrochemical gradient	1932-01-01	27/18862	0.0448405	0.135803	0.0918163	4509	1
BP	GO:0015986	ATP synthesis coupled proton transport	1932-01-01	27/18862	0.0448405	0.135803	0.0918163	4509	1
BP	GO:0018195	peptidyl-arginine modification	1932-01-01	27/18862	0.0448405	0.135803	0.0918163	11315	1
BP	GO:0048665	neuron fate specification	1932-01-01	27/18862	0.0448405	0.135803	0.0918163	3670	1
BP	GO:1902883	negative regulation of response to oxidative stress	1932-01-01	27/18862	0.0448405	0.135803	0.0918163	11315	1
BP	GO:1903649	regulation of cytoplasmic transport	1932-01-01	27/18862	0.0448405	0.135803	0.0918163	6653	1
BP	GO:0051236	establishment of RNA localization	1932-02-01	201/18862	0.0454708	0.137126	0.092711	23293/6209	2
BP	GO:0003299	muscle hypertrophy in response to stress	1932-01-01	28/18862	0.0464633	0.137126	0.092711	2308	1
BP	GO:0010575	positive regulation of vascular endothelial growth factor production	1932-01-01	28/18862	0.0464633	0.137126	0.092711	3670	1
BP	GO:0014887	cardiac muscle adaptation	1932-01-01	28/18862	0.0464633	0.137126	0.092711	2308	1
BP	GO:0014898	cardiac muscle hypertrophy in response to stress	1932-01-01	28/18862	0.0464633	0.137126	0.092711	2308	1
BP	GO:0032607	interferon-alpha production	1932-01-01	28/18862	0.0464633	0.137126	0.092711	5802	1
BP	GO:0032647	regulation of interferon-alpha production	1932-01-01	28/18862	0.0464633	0.137126	0.092711	5802	1
BP	GO:0035883	enteroendocrine cell differentiation	1932-01-01	28/18862	0.0464633	0.137126	0.092711	3642	1
BP	GO:0070861	regulation of protein exit from endoplasmic reticulum	1932-01-01	28/18862	0.0464633	0.137126	0.092711	6653	1
BP	GO:1902175	regulation of oxidative stress-induced intrinsic apoptotic signaling pathway	1932-01-01	28/18862	0.0464633	0.137126	0.092711	11315	1
BP	GO:1902547	regulation of cellular response to vascular endothelial growth factor stimulus	1932-01-01	28/18862	0.0464633	0.137126	0.092711	967	1
BP	GO:1903793	positive regulation of anion transport	1932-03-01	478/18862	0.0466165	0.13726	0.0928014	6653/846/3670	3
BP	GO:0002064	epithelial cell development	1932-02-01	207/18862	0.0479329	0.137581	0.0930184	5802/3642	2
BP	GO:0001773	myeloid dendritic cell activation	1932-01-01	29/18862	0.0480834	0.137581	0.0930184	10202	1
BP	GO:0003209	cardiac atrium morphogenesis	1932-01-01	29/18862	0.0480834	0.137581	0.0930184	3670	1
BP	GO:0006517	protein deglycosylation	1932-01-01	29/18862	0.0480834	0.137581	0.0930184	11315	1
BP	GO:0021522	spinal cord motor neuron differentiation	1932-01-01	29/18862	0.0480834	0.137581	0.0930184	3670	1
BP	GO:0034067	protein localization to Golgi apparatus	1932-01-01	29/18862	0.0480834	0.137581	0.0930184	6653	1
BP	GO:0035066	positive regulation of histone acetylation	1932-01-01	29/18862	0.0480834	0.137581	0.0930184	3670	1
BP	GO:0048679	regulation of axon regeneration	1932-01-01	29/18862	0.0480834	0.137581	0.0930184	5802	1
BP	GO:0060914	heart formation	1932-01-01	29/18862	0.0480834	0.137581	0.0930184	3670	1
BP	GO:0071549	cellular response to dexamethasone stimulus	1932-01-01	29/18862	0.0480834	0.137581	0.0930184	2308	1
BP	GO:0097106	postsynaptic density organization	1932-01-01	29/18862	0.0480834	0.137581	0.0930184	5802	1
BP	GO:1902430	negative regulation of amyloid-beta formation	1932-01-01	29/18862	0.0480834	0.137581	0.0930184	6653	1
BP	GO:0043312	neutrophil degranulation	1932-03-01	485/18862	0.0483152	0.137581	0.0930184	2512/967/4860	3
BP	GO:0060284	regulation of cell development	1932-03-01	485/18862	0.0483152	0.137581	0.0930184	6653/1946/5802	3
BP	GO:0000956	nuclear-transcribed mRNA catabolic process	1932-02-01	208/18862	0.048348	0.137581	0.0930184	23293/6209	2
BP	GO:0002283	neutrophil activation involved in immune response	1932-03-01	488/18862	0.0490527	0.139209	0.0941193	2512/967/4860	3
BP	GO:0031669	cellular response to nutrient levels	1932-02-01	210/18862	0.0491821	0.139209	0.0941193	846/2308	2
BP	GO:0034694	response to prostaglandin	1932-01-01	30/18862	0.0497008	0.139209	0.0941193	54331	1
BP	GO:0036474	cell death in response to hydrogen peroxide	1932-01-01	30/18862	0.0497008	0.139209	0.0941193	11315	1
BP	GO:0071295	cellular response to vitamin	1932-01-01	30/18862	0.0497008	0.139209	0.0941193	846	1
BP	GO:0099068	postsynapse assembly	1932-01-01	30/18862	0.0497008	0.139209	0.0941193	5802	1
BP	GO:1902235	regulation of endoplasmic reticulum stress-induced intrinsic apoptotic signaling pathway	1932-01-01	30/18862	0.0497008	0.139209	0.0941193	11315	1
BP	GO:0016311	dephosphorylation	1932-03-01	491/18862	0.0497957	0.139209	0.0941193	23293/5802/7803	3
BP	GO:0008406	gonad development	1932-02-01	212/18862	0.0500216	0.139534	0.0943389	4678/22836	2
BP	GO:0045907	positive regulation of vasoconstriction	1932-01-01	31/18862	0.0513156	0.141899	0.0959379	846	1
BP	GO:0098810	neurotransmitter reuptake	1932-01-01	31/18862	0.0513156	0.141899	0.0959379	11315	1
BP	GO:0099084	postsynaptic specialization organization	1932-01-01	31/18862	0.0513156	0.141899	0.0959379	5802	1
BP	GO:1903146	regulation of autophagy of mitochondrion	1932-01-01	31/18862	0.0513156	0.141899	0.0959379	11315	1
BP	GO:0002446	neutrophil mediated immunity	1932-03-01	499/18862	0.0518044	0.14294	0.0966417	2512/967/4860	3
BP	GO:0042119	neutrophil activation	1932-03-01	500/18862	0.0520583	0.143243	0.0968465	2512/967/4860	3
BP	GO:0045137	development of primary sexual characteristics	1932-02-01	217/18862	0.052143	0.143243	0.0968465	4678/22836	2
BP	GO:0001881	receptor recycling	1932-01-01	32/18862	0.0529277	0.143243	0.0968465	6653	1
BP	GO:0002861	regulation of inflammatory response to antigenic stimulus	1932-01-01	32/18862	0.0529277	0.143243	0.0968465	11315	1
BP	GO:0006335	DNA replication-dependent nucleosome assembly	1932-01-01	32/18862	0.0529277	0.143243	0.0968465	4678	1
BP	GO:0009072	aromatic amino acid family metabolic process	1932-01-01	32/18862	0.0529277	0.143243	0.0968465	11315	1
BP	GO:0034723	DNA replication-dependent nucleosome organization	1932-01-01	32/18862	0.0529277	0.143243	0.0968465	4678	1
BP	GO:0046825	regulation of protein export from nucleus	1932-01-01	32/18862	0.0529277	0.143243	0.0968465	11315	1
BP	GO:0070570	regulation of neuron projection regeneration	1932-01-01	32/18862	0.0529277	0.143243	0.0968465	5802	1
BP	GO:0006333	chromatin assembly or disassembly	1932-02-01	221/18862	0.0538634	0.145157	0.098141	4678/6046	2
BP	GO:0009743	response to carbohydrate	1932-02-01	221/18862	0.0538634	0.145157	0.098141	1946/846	2
BP	GO:0003203	endocardial cushion morphogenesis	1932-01-01	33/18862	0.0545372	0.145738	0.0985336	3670	1
BP	GO:0032770	positive regulation of monooxygenase activity	1932-01-01	33/18862	0.0545372	0.145738	0.0985336	11315	1
BP	GO:0055094	response to lipoprotein particle	1932-01-01	33/18862	0.0545372	0.145738	0.0985336	846	1
BP	GO:1902992	negative regulation of amyloid precursor protein catabolic process	1932-01-01	33/18862	0.0545372	0.145738	0.0985336	6653	1
BP	GO:0000302	response to reactive oxygen species	1932-02-01	224/18862	0.055167	0.146343	0.0989424	11315/2308	2
BP	GO:0016485	protein processing	1932-02-01	224/18862	0.055167	0.146343	0.0989424	27344/5122	2
BP	GO:0045732	positive regulation of protein catabolic process	1932-02-01	225/18862	0.055604	0.146343	0.0989424	6653/2308	2
BP	GO:0032869	cellular response to insulin stimulus	1932-02-01	226/18862	0.0560423	0.146343	0.0989424	6653/2308	2
BP	GO:0009164	nucleoside catabolic process	1932-01-01	34/18862	0.056144	0.146343	0.0989424	4860	1
BP	GO:0010092	specification of animal organ identity	1932-01-01	34/18862	0.056144	0.146343	0.0989424	3670	1
BP	GO:0010614	negative regulation of cardiac muscle hypertrophy	1932-01-01	34/18862	0.056144	0.146343	0.0989424	2308	1
BP	GO:0033280	response to vitamin D	1932-01-01	34/18862	0.056144	0.146343	0.0989424	846	1
BP	GO:0043094	cellular metabolic compound salvage	1932-01-01	34/18862	0.056144	0.146343	0.0989424	4860	1
BP	GO:0050931	pigment cell differentiation	1932-01-01	34/18862	0.056144	0.146343	0.0989424	967	1
BP	GO:0071402	cellular response to lipoprotein particle stimulus	1932-01-01	34/18862	0.056144	0.146343	0.0989424	846	1
BP	GO:2000758	positive regulation of peptidyl-lysine acetylation	1932-01-01	34/18862	0.056144	0.146343	0.0989424	3670	1
BP	GO:0003230	cardiac atrium development	1932-01-01	35/18862	0.0577482	0.147063	0.0994294	3670	1
BP	GO:0032148	activation of protein kinase B activity	1932-01-01	35/18862	0.0577482	0.147063	0.0994294	11315	1
BP	GO:0032205	negative regulation of telomere maintenance	1932-01-01	35/18862	0.0577482	0.147063	0.0994294	23293	1
BP	GO:0033144	negative regulation of intracellular steroid hormone receptor signaling pathway	1932-01-01	35/18862	0.0577482	0.147063	0.0994294	3670	1
BP	GO:0042407	cristae formation	1932-01-01	35/18862	0.0577482	0.147063	0.0994294	4509	1
BP	GO:0060338	regulation of type I interferon-mediated signaling pathway	1932-01-01	35/18862	0.0577482	0.147063	0.0994294	23170	1
BP	GO:0071108	protein K48-linked deubiquitination	1932-01-01	35/18862	0.0577482	0.147063	0.0994294	11315	1
BP	GO:0097009	energy homeostasis	1932-01-01	35/18862	0.0577482	0.147063	0.0994294	2308	1
BP	GO:1903427	negative regulation of reactive oxygen species biosynthetic process	1932-01-01	35/18862	0.0577482	0.147063	0.0994294	11315	1
BP	GO:0007160	cell-matrix adhesion	1932-02-01	230/18862	0.0578078	0.147063	0.0994294	967/1946	2
BP	GO:0007188	adenylate cyclase-modulating G protein-coupled receptor signaling pathway	1932-02-01	230/18862	0.0578078	0.147063	0.0994294	846/54331	2
BP	GO:0051402	neuron apoptotic process	1932-02-01	230/18862	0.0578078	0.147063	0.0994294	11315/3670	2
BP	GO:0071453	cellular response to oxygen levels	1932-02-01	231/18862	0.0582522	0.147898	0.0999938	846/2308	2
BP	GO:0014741	negative regulation of muscle hypertrophy	1932-01-01	36/18862	0.0593497	0.149787	0.101271	2308	1
BP	GO:0032435	negative regulation of proteasomal ubiquitin-dependent protein catabolic process	1932-01-01	36/18862	0.0593497	0.149787	0.101271	11315	1
BP	GO:0042311	vasodilation	1932-01-01	36/18862	0.0593497	0.149787	0.101271	846	1
BP	GO:0006403	RNA localization	1932-02-01	234/18862	0.0595927	0.150103	0.101485	23293/6209	2
BP	GO:0031668	cellular response to extracellular stimulus	1932-02-01	235/18862	0.060042	0.150936	0.102048	846/2308	2
BP	GO:0031348	negative regulation of defense response	1932-02-01	236/18862	0.0604924	0.151768	0.10261	23170/3670	2
BP	GO:0033762	response to glucagon	1932-01-01	37/18862	0.0609486	0.152312	0.102978	4519	1
BP	GO:1901031	regulation of response to reactive oxygen species	1932-01-01	37/18862	0.0609486	0.152312	0.102978	11315	1
BP	GO:0006323	DNA packaging	1932-02-01	240/18862	0.062306	0.15448	0.104444	4678/6046	2
BP	GO:0001504	neurotransmitter uptake	1932-01-01	38/18862	0.0625449	0.15448	0.104444	11315	1
BP	GO:0007223	Wnt signaling pathway, calcium modulating pathway	1932-01-01	38/18862	0.0625449	0.15448	0.104444	54331	1
BP	GO:0019433	triglyceride catabolic process	1932-01-01	38/18862	0.0625449	0.15448	0.104444	6653	1
BP	GO:0042417	dopamine metabolic process	1932-01-01	38/18862	0.0625449	0.15448	0.104444	11315	1
BP	GO:0071548	response to dexamethasone	1932-01-01	38/18862	0.0625449	0.15448	0.104444	2308	1
BP	GO:0065004	protein-DNA complex assembly	1932-02-01	241/18862	0.0627624	0.154717	0.104604	4678/6046	2
BP	GO:0016197	endosomal transport	1932-02-01	242/18862	0.0632199	0.155543	0.105163	6653/22836	2
BP	GO:0006469	negative regulation of protein kinase activity	1932-02-01	243/18862	0.0636785	0.155695	0.105266	11315/6653	2
BP	GO:0061448	connective tissue development	1932-02-01	243/18862	0.0636785	0.155695	0.105266	6653/846	2
BP	GO:0002066	columnar/cuboidal epithelial cell development	1932-01-01	39/18862	0.0641385	0.155695	0.105266	3642	1
BP	GO:0007257	activation of JUN kinase activity	1932-01-01	39/18862	0.0641385	0.155695	0.105266	197259	1
BP	GO:0033146	regulation of intracellular estrogen receptor signaling pathway	1932-01-01	39/18862	0.0641385	0.155695	0.105266	3670	1
BP	GO:0086091	regulation of heart rate by cardiac conduction	1932-01-01	39/18862	0.0641385	0.155695	0.105266	3670	1
BP	GO:0090207	regulation of triglyceride metabolic process	1932-01-01	39/18862	0.0641385	0.155695	0.105266	6653	1
BP	GO:0006623	protein targeting to vacuole	1932-01-01	40/18862	0.0657295	0.157751	0.106655	6653	1
BP	GO:0007212	dopamine receptor signaling pathway	1932-01-01	40/18862	0.0657295	0.157751	0.106655	54331	1
BP	GO:0008207	C21-steroid hormone metabolic process	1932-01-01	40/18862	0.0657295	0.157751	0.106655	10202	1
BP	GO:0030521	androgen receptor signaling pathway	1932-01-01	40/18862	0.0657295	0.157751	0.106655	11315	1
BP	GO:0032735	positive regulation of interleukin-12 production	1932-01-01	40/18862	0.0657295	0.157751	0.106655	3670	1
BP	GO:0046717	acid secretion	1932-01-01	40/18862	0.0657295	0.157751	0.106655	846	1
BP	GO:0033157	regulation of intracellular protein transport	1932-02-01	248/18862	0.065989	0.158075	0.106875	11315/6653	2
BP	GO:0001709	cell fate determination	1932-01-01	41/18862	0.0673179	0.158445	0.107125	3670	1
BP	GO:0010939	regulation of necrotic cell death	1932-01-01	41/18862	0.0673179	0.158445	0.107125	4513	1
BP	GO:0021983	pituitary gland development	1932-01-01	41/18862	0.0673179	0.158445	0.107125	3670	1
BP	GO:0033574	response to testosterone	1932-01-01	41/18862	0.0673179	0.158445	0.107125	4678	1
BP	GO:0072524	pyridine-containing compound metabolic process	1932-01-01	41/18862	0.0673179	0.158445	0.107125	4860	1
BP	GO:0090279	regulation of calcium ion import	1932-01-01	41/18862	0.0673179	0.158445	0.107125	846	1
BP	GO:0090317	negative regulation of intracellular protein transport	1932-01-01	41/18862	0.0673179	0.158445	0.107125	11315	1
BP	GO:1902042	negative regulation of extrinsic apoptotic signaling pathway via death domain receptors	1932-01-01	41/18862	0.0673179	0.158445	0.107125	11315	1
BP	GO:1903580	positive regulation of ATP metabolic process	1932-01-01	41/18862	0.0673179	0.158445	0.107125	4513	1
BP	GO:1901617	organic hydroxy compound biosynthetic process	1932-02-01	251/18862	0.0673888	0.158445	0.107125	11315/3642	2
BP	GO:0015931	nucleobase-containing compound transport	1932-02-01	253/18862	0.0683277	0.160356	0.108417	23293/6209	2
BP	GO:0003197	endocardial cushion development	1932-01-01	42/18862	0.0689037	0.160523	0.10853	3670	1
BP	GO:0031670	cellular response to nutrient	1932-01-01	42/18862	0.0689037	0.160523	0.10853	846	1
BP	GO:0072595	maintenance of protein localization in organelle	1932-01-01	42/18862	0.0689037	0.160523	0.10853	11315	1
BP	GO:1900371	regulation of purine nucleotide biosynthetic process	1932-01-01	42/18862	0.0689037	0.160523	0.10853	4513	1
BP	GO:0031330	negative regulation of cellular catabolic process	1932-02-01	255/18862	0.0692709	0.161083	0.108909	11315/6653	2
BP	GO:0021517	ventral spinal cord development	1932-01-01	43/18862	0.0704869	0.161548	0.109223	3670	1
BP	GO:0030517	negative regulation of axon extension	1932-01-01	43/18862	0.0704869	0.161548	0.109223	5802	1
BP	GO:0030808	regulation of nucleotide biosynthetic process	1932-01-01	43/18862	0.0704869	0.161548	0.109223	4513	1
BP	GO:0034080	CENP-A containing nucleosome assembly	1932-01-01	43/18862	0.0704869	0.161548	0.109223	4678	1
BP	GO:0035094	response to nicotine	1932-01-01	43/18862	0.0704869	0.161548	0.109223	4538	1
BP	GO:0061641	CENP-A containing chromatin organization	1932-01-01	43/18862	0.0704869	0.161548	0.109223	4678	1
BP	GO:0070266	necroptotic process	1932-01-01	43/18862	0.0704869	0.161548	0.109223	197259	1
BP	GO:0098927	vesicle-mediated transport between endosomal compartments	1932-01-01	43/18862	0.0704869	0.161548	0.109223	6653	1
BP	GO:0008631	intrinsic apoptotic signaling pathway in response to oxidative stress	1932-01-01	44/18862	0.0720674	0.163696	0.110675	11315	1
BP	GO:0048066	developmental pigmentation	1932-01-01	44/18862	0.0720674	0.163696	0.110675	967	1
BP	GO:0055010	ventricular cardiac muscle tissue morphogenesis	1932-01-01	44/18862	0.0720674	0.163696	0.110675	3670	1
BP	GO:1901658	glycosyl compound catabolic process	1932-01-01	44/18862	0.0720674	0.163696	0.110675	4860	1
BP	GO:1903573	negative regulation of response to endoplasmic reticulum stress	1932-01-01	44/18862	0.0720674	0.163696	0.110675	11315	1
BP	GO:0007548	sex differentiation	1932-02-01	262/18862	0.0726065	0.164333	0.111106	4678/22836	2
BP	GO:0050730	regulation of peptidyl-tyrosine phosphorylation	1932-02-01	262/18862	0.0726065	0.164333	0.111106	1946/3670	2
BP	GO:0021545	cranial nerve development	1932-01-01	45/18862	0.0736454	0.1658	0.112097	3670	1
BP	GO:0034122	negative regulation of toll-like receptor signaling pathway	1932-01-01	45/18862	0.0736454	0.1658	0.112097	5802	1
BP	GO:1901985	positive regulation of protein acetylation	1932-01-01	45/18862	0.0736454	0.1658	0.112097	3670	1
BP	GO:0033673	negative regulation of kinase activity	1932-02-01	267/18862	0.0750209	0.167274	0.113094	11315/6653	2
BP	GO:0006195	purine nucleotide catabolic process	1932-01-01	46/18862	0.0752207	0.167274	0.113094	4860	1
BP	GO:0007595	lactation	1932-01-01	46/18862	0.0752207	0.167274	0.113094	4513	1
BP	GO:0045981	positive regulation of nucleotide metabolic process	1932-01-01	46/18862	0.0752207	0.167274	0.113094	4513	1
BP	GO:0048483	autonomic nervous system development	1932-01-01	46/18862	0.0752207	0.167274	0.113094	3642	1
BP	GO:0061462	protein localization to lysosome	1932-01-01	46/18862	0.0752207	0.167274	0.113094	6653	1
BP	GO:1900544	positive regulation of purine nucleotide metabolic process	1932-01-01	46/18862	0.0752207	0.167274	0.113094	4513	1
BP	GO:0015872	dopamine transport	1932-01-01	47/18862	0.0767935	0.168835	0.11415	11315	1
BP	GO:0016574	histone ubiquitination	1932-01-01	47/18862	0.0767935	0.168835	0.11415	11315	1
BP	GO:0031055	chromatin remodeling at centromere	1932-01-01	47/18862	0.0767935	0.168835	0.11415	4678	1
BP	GO:0032480	negative regulation of type I interferon production	1932-01-01	47/18862	0.0767935	0.168835	0.11415	5802	1
BP	GO:0051972	regulation of telomerase activity	1932-01-01	47/18862	0.0767935	0.168835	0.11415	23293	1
BP	GO:0097028	dendritic cell differentiation	1932-01-01	47/18862	0.0767935	0.168835	0.11415	10202	1
BP	GO:1903532	positive regulation of secretion by cell	1932-02-01	271/18862	0.0769712	0.168835	0.11415	846/3670	2
BP	GO:0033044	regulation of chromosome organization	1932-02-01	273/18862	0.0779525	0.168835	0.11415	23293/3670	2
BP	GO:0002067	glandular epithelial cell differentiation	1932-01-01	48/18862	0.0783636	0.168835	0.11415	3642	1
BP	GO:0002673	regulation of acute inflammatory response	1932-01-01	48/18862	0.0783636	0.168835	0.11415	11315	1
BP	GO:0018198	peptidyl-cysteine modification	1932-01-01	48/18862	0.0783636	0.168835	0.11415	11315	1
BP	GO:0032527	protein exit from endoplasmic reticulum	1932-01-01	48/18862	0.0783636	0.168835	0.11415	6653	1
BP	GO:0038084	vascular endothelial growth factor signaling pathway	1932-01-01	48/18862	0.0783636	0.168835	0.11415	967	1
BP	GO:0042398	cellular modified amino acid biosynthetic process	1932-01-01	48/18862	0.0783636	0.168835	0.11415	11315	1
BP	GO:0046461	neutral lipid catabolic process	1932-01-01	48/18862	0.0783636	0.168835	0.11415	6653	1
BP	GO:0046464	acylglycerol catabolic process	1932-01-01	48/18862	0.0783636	0.168835	0.11415	6653	1
BP	GO:0061028	establishment of endothelial barrier	1932-01-01	48/18862	0.0783636	0.168835	0.11415	5802	1
BP	GO:1902003	regulation of amyloid-beta formation	1932-01-01	48/18862	0.0783636	0.168835	0.11415	6653	1
BP	GO:0030522	intracellular receptor signaling pathway	1932-02-01	274/18862	0.0784447	0.168835	0.11415	11315/3670	2
BP	GO:0007411	axon guidance	1932-02-01	277/18862	0.0799272	0.16994	0.114896	1946/3670	2
BP	GO:0021515	cell differentiation in spinal cord	1932-01-01	49/18862	0.0799312	0.16994	0.114896	3670	1
BP	GO:0032873	negative regulation of stress-activated MAPK cascade	1932-01-01	49/18862	0.0799312	0.16994	0.114896	2308	1
BP	GO:0046638	positive regulation of alpha-beta T cell differentiation	1932-01-01	49/18862	0.0799312	0.16994	0.114896	4860	1
BP	GO:0070303	negative regulation of stress-activated protein kinase signaling cascade	1932-01-01	49/18862	0.0799312	0.16994	0.114896	2308	1
BP	GO:0072132	mesenchyme morphogenesis	1932-01-01	49/18862	0.0799312	0.16994	0.114896	3670	1
BP	GO:2000059	negative regulation of ubiquitin-dependent protein catabolic process	1932-01-01	49/18862	0.0799312	0.16994	0.114896	11315	1
BP	GO:0032868	response to insulin	1932-02-01	278/18862	0.0804233	0.16994	0.114896	6653/2308	2
BP	GO:0097485	neuron projection guidance	1932-02-01	278/18862	0.0804233	0.16994	0.114896	1946/3670	2
BP	GO:0002931	response to ischemia	1932-01-01	50/18862	0.0814962	0.16994	0.114896	846	1
BP	GO:0003229	ventricular cardiac muscle tissue development	1932-01-01	50/18862	0.0814962	0.16994	0.114896	3670	1
BP	GO:0032456	endocytic recycling	1932-01-01	50/18862	0.0814962	0.16994	0.114896	6653	1
BP	GO:0032648	regulation of interferon-beta production	1932-01-01	50/18862	0.0814962	0.16994	0.114896	5802	1
BP	GO:0034656	nucleobase-containing small molecule catabolic process	1932-01-01	50/18862	0.0814962	0.16994	0.114896	4860	1
BP	GO:0048260	positive regulation of receptor-mediated endocytosis	1932-01-01	50/18862	0.0814962	0.16994	0.114896	967	1
BP	GO:0051339	regulation of lyase activity	1932-01-01	50/18862	0.0814962	0.16994	0.114896	11315	1
BP	GO:1901799	negative regulation of proteasomal protein catabolic process	1932-01-01	50/18862	0.0814962	0.16994	0.114896	11315	1
BP	GO:1903202	negative regulation of oxidative stress-induced cell death	1932-01-01	50/18862	0.0814962	0.16994	0.114896	11315	1
BP	GO:2000179	positive regulation of neural precursor cell proliferation	1932-01-01	50/18862	0.0814962	0.16994	0.114896	3642	1
BP	GO:0071824	protein-DNA complex subunit organization	1932-02-01	281/18862	0.0819177	0.170539	0.115301	4678/6046	2
BP	GO:0031503	protein-containing complex localization	1932-02-01	283/18862	0.0829188	0.170956	0.115583	23293/6209	2
BP	GO:0000186	activation of MAPKK activity	1932-01-01	51/18862	0.0830586	0.170956	0.115583	197259	1
BP	GO:0010718	positive regulation of epithelial to mesenchymal transition	1932-01-01	51/18862	0.0830586	0.170956	0.115583	3670	1
BP	GO:0030514	negative regulation of BMP signaling pathway	1932-01-01	51/18862	0.0830586	0.170956	0.115583	6653	1
BP	GO:0072523	purine-containing compound catabolic process	1932-01-01	51/18862	0.0830586	0.170956	0.115583	4860	1
BP	GO:0097300	programmed necrotic cell death	1932-01-01	51/18862	0.0830586	0.170956	0.115583	197259	1
BP	GO:2000677	regulation of transcription regulatory region DNA binding	1932-01-01	51/18862	0.0830586	0.170956	0.115583	11315	1
BP	GO:0014888	striated muscle adaptation	1932-01-01	52/18862	0.0846185	0.172768	0.116809	2308	1
BP	GO:0032210	regulation of telomere maintenance via telomerase	1932-01-01	52/18862	0.0846185	0.172768	0.116809	23293	1
BP	GO:0032608	interferon-beta production	1932-01-01	52/18862	0.0846185	0.172768	0.116809	5802	1
BP	GO:0033059	cellular pigmentation	1932-01-01	52/18862	0.0846185	0.172768	0.116809	967	1
BP	GO:0072666	establishment of protein localization to vacuole	1932-01-01	52/18862	0.0846185	0.172768	0.116809	6653	1
BP	GO:0002090	regulation of receptor internalization	1932-01-01	53/18862	0.0861757	0.174825	0.1182	967	1
BP	GO:0006336	DNA replication-independent nucleosome assembly	1932-01-01	53/18862	0.0861757	0.174825	0.1182	4678	1
BP	GO:0045599	negative regulation of fat cell differentiation	1932-01-01	53/18862	0.0861757	0.174825	0.1182	2308	1
BP	GO:0051438	regulation of ubiquitin-protein transferase activity	1932-01-01	53/18862	0.0861757	0.174825	0.1182	11315	1
BP	GO:1903522	regulation of blood circulation	1932-02-01	290/18862	0.0864529	0.175108	0.118391	846/3670	2
BP	GO:0034724	DNA replication-independent nucleosome organization	1932-01-01	54/18862	0.0877304	0.177414	0.119949	4678	1
BP	GO:0051047	positive regulation of secretion	1932-02-01	295/18862	0.0890053	0.179037	0.121047	846/3670	2
BP	GO:1903829	positive regulation of cellular protein localization	1932-02-01	295/18862	0.0890053	0.179037	0.121047	11315/6653	2
BP	GO:0001755	neural crest cell migration	1932-01-01	55/18862	0.0892826	0.179037	0.121047	3670	1
BP	GO:0016233	telomere capping	1932-01-01	55/18862	0.0892826	0.179037	0.121047	23293	1
BP	GO:1902991	regulation of amyloid precursor protein catabolic process	1932-01-01	55/18862	0.0892826	0.179037	0.121047	6653	1
BP	GO:0051348	negative regulation of transferase activity	1932-02-01	296/18862	0.0895186	0.179037	0.121047	11315/6653	2
BP	GO:0090287	regulation of cellular response to growth factor stimulus	1932-02-01	296/18862	0.0895186	0.179037	0.121047	967/6653	2
BP	GO:0007007	inner mitochondrial membrane organization	1932-01-01	56/18862	0.0908321	0.180529	0.122056	4509	1
BP	GO:0032731	positive regulation of interleukin-1 beta production	1932-01-01	56/18862	0.0908321	0.180529	0.122056	3670	1
BP	GO:0034508	centromere complex assembly	1932-01-01	56/18862	0.0908321	0.180529	0.122056	4678	1
BP	GO:0051353	positive regulation of oxidoreductase activity	1932-01-01	56/18862	0.0908321	0.180529	0.122056	11315	1
BP	GO:0030520	intracellular estrogen receptor signaling pathway	1932-01-01	57/18862	0.0923792	0.181617	0.122791	3670	1
BP	GO:0032387	negative regulation of intracellular transport	1932-01-01	57/18862	0.0923792	0.181617	0.122791	11315	1
BP	GO:0032757	positive regulation of interleukin-8 production	1932-01-01	57/18862	0.0923792	0.181617	0.122791	11315	1
BP	GO:0034205	amyloid-beta formation	1932-01-01	57/18862	0.0923792	0.181617	0.122791	6653	1
BP	GO:0055008	cardiac muscle tissue morphogenesis	1932-01-01	57/18862	0.0923792	0.181617	0.122791	3670	1
BP	GO:0061178	regulation of insulin secretion involved in cellular response to glucose stimulus	1932-01-01	57/18862	0.0923792	0.181617	0.122791	1946	1
BP	GO:1900024	regulation of substrate adhesion-dependent cell spreading	1932-01-01	57/18862	0.0923792	0.181617	0.122791	1946	1
BP	GO:0071496	cellular response to external stimulus	1932-02-01	303/18862	0.0931364	0.182823	0.123607	846/2308	2
BP	GO:0010574	regulation of vascular endothelial growth factor production	1932-01-01	58/18862	0.0939236	0.182957	0.123697	3670	1
BP	GO:0030865	cortical cytoskeleton organization	1932-01-01	58/18862	0.0939236	0.182957	0.123697	22836	1
BP	GO:0032781	positive regulation of ATPase activity	1932-01-01	58/18862	0.0939236	0.182957	0.123697	846	1
BP	GO:0043486	histone exchange	1932-01-01	58/18862	0.0939236	0.182957	0.123697	4678	1
BP	GO:0046128	purine ribonucleoside metabolic process	1932-01-01	58/18862	0.0939236	0.182957	0.123697	4860	1
BP	GO:0022604	regulation of cell morphogenesis	1932-02-01	305/18862	0.0941781	0.183172	0.123843	1946/22836	2
BP	GO:0043405	regulation of MAP kinase activity	1932-02-01	307/18862	0.0952232	0.184828	0.124963	197259/6653	2
BP	GO:0048663	neuron fate commitment	1932-01-01	59/18862	0.0954656	0.184828	0.124963	3670	1
BP	GO:1902041	regulation of extrinsic apoptotic signaling pathway via death domain receptors	1932-01-01	59/18862	0.0954656	0.184828	0.124963	11315	1
BP	GO:0060562	epithelial tube morphogenesis	1932-02-01	309/18862	0.0962717	0.185829	0.125639	6046/846	2
BP	GO:0032615	interleukin-12 production	1932-01-01	60/18862	0.097005	0.185829	0.125639	3670	1
BP	GO:0032655	regulation of interleukin-12 production	1932-01-01	60/18862	0.097005	0.185829	0.125639	3670	1
BP	GO:0050994	regulation of lipid catabolic process	1932-01-01	60/18862	0.097005	0.185829	0.125639	6653	1
BP	GO:0060998	regulation of dendritic spine development	1932-01-01	60/18862	0.097005	0.185829	0.125639	5802	1
BP	GO:1904356	regulation of telomere maintenance via telomere lengthening	1932-01-01	60/18862	0.097005	0.185829	0.125639	23293	1
BP	GO:2001244	positive regulation of intrinsic apoptotic signaling pathway	1932-01-01	60/18862	0.097005	0.185829	0.125639	11315	1
BP	GO:0009895	negative regulation of catabolic process	1932-02-01	312/18862	0.097851	0.186526	0.12611	11315/6653	2
BP	GO:0019229	regulation of vasoconstriction	1932-01-01	61/18862	0.0985418	0.186526	0.12611	846	1
BP	GO:0032623	interleukin-2 production	1932-01-01	61/18862	0.0985418	0.186526	0.12611	4860	1
BP	GO:0042278	purine nucleoside metabolic process	1932-01-01	61/18862	0.0985418	0.186526	0.12611	4860	1
BP	GO:0046686	response to cadmium ion	1932-01-01	61/18862	0.0985418	0.186526	0.12611	4519	1
BP	GO:0048645	animal organ formation	1932-01-01	61/18862	0.0985418	0.186526	0.12611	3670	1
BP	GO:0070059	intrinsic apoptotic signaling pathway in response to endoplasmic reticulum stress	1932-01-01	61/18862	0.0985418	0.186526	0.12611	11315	1
BP	GO:0070542	response to fatty acid	1932-01-01	61/18862	0.0985418	0.186526	0.12611	2308	1
BP	GO:0002437	inflammatory response to antigenic stimulus	1932-01-01	62/18862	0.100076	0.188309	0.127316	11315	1
BP	GO:0006521	regulation of cellular amino acid metabolic process	1932-01-01	62/18862	0.100076	0.188309	0.127316	11315	1
BP	GO:0008344	adult locomotory behavior	1932-01-01	62/18862	0.100076	0.188309	0.127316	11315	1
BP	GO:0010573	vascular endothelial growth factor production	1932-01-01	62/18862	0.100076	0.188309	0.127316	3670	1
BP	GO:0006081	cellular aldehyde metabolic process	1932-01-01	63/18862	0.101608	0.190346	0.128693	11315	1
BP	GO:0045665	negative regulation of neuron differentiation	1932-01-01	63/18862	0.101608	0.190346	0.128693	3670	1
BP	GO:2000378	negative regulation of reactive oxygen species metabolic process	1932-01-01	63/18862	0.101608	0.190346	0.128693	11315	1
BP	GO:0006749	glutathione metabolic process	1932-01-01	64/18862	0.103137	0.191519	0.129486	11315	1
BP	GO:0032732	positive regulation of interleukin-1 production	1932-01-01	64/18862	0.103137	0.191519	0.129486	3670	1
BP	GO:0042255	ribosome assembly	1932-01-01	64/18862	0.103137	0.191519	0.129486	6209	1
BP	GO:0051893	regulation of focal adhesion assembly	1932-01-01	64/18862	0.103137	0.191519	0.129486	1946	1
BP	GO:0060411	cardiac septum morphogenesis	1932-01-01	64/18862	0.103137	0.191519	0.129486	3670	1
BP	GO:0090109	regulation of cell-substrate junction assembly	1932-01-01	64/18862	0.103137	0.191519	0.129486	1946	1
BP	GO:0032729	positive regulation of interferon-gamma production	1932-01-01	65/18862	0.104664	0.192602	0.130218	3670	1
BP	GO:0032768	regulation of monooxygenase activity	1932-01-01	65/18862	0.104664	0.192602	0.130218	11315	1
BP	GO:0035773	insulin secretion involved in cellular response to glucose stimulus	1932-01-01	65/18862	0.104664	0.192602	0.130218	1946	1
BP	GO:0045824	negative regulation of innate immune response	1932-01-01	65/18862	0.104664	0.192602	0.130218	23170	1
BP	GO:1903051	negative regulation of proteolysis involved in cellular protein catabolic process	1932-01-01	65/18862	0.104664	0.192602	0.130218	11315	1
BP	GO:0006470	protein dephosphorylation	1932-02-01	325/18862	0.10478	0.192602	0.130218	5802/7803	2
BP	GO:0071375	cellular response to peptide hormone stimulus	1932-02-01	325/18862	0.10478	0.192602	0.130218	6653/2308	2
BP	GO:0001885	endothelial cell development	1932-01-01	66/18862	0.106188	0.193895	0.131093	5802	1
BP	GO:0046635	positive regulation of alpha-beta T cell activation	1932-01-01	66/18862	0.106188	0.193895	0.131093	4860	1
BP	GO:0050771	negative regulation of axonogenesis	1932-01-01	66/18862	0.106188	0.193895	0.131093	5802	1
BP	GO:1900076	regulation of cellular response to insulin stimulus	1932-01-01	66/18862	0.106188	0.193895	0.131093	6653	1
BP	GO:0006898	receptor-mediated endocytosis	1932-02-01	328/18862	0.106398	0.193895	0.131093	967/6653	2
BP	GO:0010506	regulation of autophagy	1932-02-01	328/18862	0.106398	0.193895	0.131093	11315/2308	2
BP	GO:0010812	negative regulation of cell-substrate adhesion	1932-01-01	67/18862	0.10771	0.194336	0.131391	1946	1
BP	GO:0042987	amyloid precursor protein catabolic process	1932-01-01	67/18862	0.10771	0.194336	0.131391	6653	1
BP	GO:0046637	regulation of alpha-beta T cell differentiation	1932-01-01	67/18862	0.10771	0.194336	0.131391	4860	1
BP	GO:0050435	amyloid-beta metabolic process	1932-01-01	67/18862	0.10771	0.194336	0.131391	6653	1
BP	GO:0050918	positive chemotaxis	1932-01-01	67/18862	0.10771	0.194336	0.131391	846	1
BP	GO:0060415	muscle tissue morphogenesis	1932-01-01	67/18862	0.10771	0.194336	0.131391	3670	1
BP	GO:1901607	alpha-amino acid biosynthetic process	1932-01-01	67/18862	0.10771	0.194336	0.131391	11315	1
BP	GO:0006520	cellular amino acid metabolic process	1932-02-01	331/18862	0.108024	0.194626	0.131587	11315/64087	2
BP	GO:0007004	telomere maintenance via telomerase	1932-01-01	68/18862	0.109229	0.195414	0.132119	23293	1
BP	GO:0010611	regulation of cardiac muscle hypertrophy	1932-01-01	68/18862	0.109229	0.195414	0.132119	2308	1
BP	GO:0043507	positive regulation of JUN kinase activity	1932-01-01	68/18862	0.109229	0.195414	0.132119	197259	1
BP	GO:0051937	catecholamine transport	1932-01-01	68/18862	0.109229	0.195414	0.132119	11315	1
BP	GO:1903201	regulation of oxidative stress-induced cell death	1932-01-01	68/18862	0.109229	0.195414	0.132119	11315	1
BP	GO:0001701	in utero embryonic development	1932-02-01	335/18862	0.110201	0.196469	0.132833	4678/4538	2
BP	GO:0003208	cardiac ventricle morphogenesis	1932-01-01	69/18862	0.110746	0.196469	0.132833	3670	1
BP	GO:0021675	nerve development	1932-01-01	69/18862	0.110746	0.196469	0.132833	3670	1
BP	GO:0042531	positive regulation of tyrosine phosphorylation of STAT protein	1932-01-01	69/18862	0.110746	0.196469	0.132833	3670	1
BP	GO:0046626	regulation of insulin receptor signaling pathway	1932-01-01	69/18862	0.110746	0.196469	0.132833	6653	1
BP	GO:0150116	regulation of cell-substrate junction organization	1932-01-01	69/18862	0.110746	0.196469	0.132833	1946	1
BP	GO:0006879	cellular iron ion homeostasis	1932-01-01	70/18862	0.11226	0.198878	0.134462	2512	1
BP	GO:1904062	regulation of cation transmembrane transport	1932-02-01	340/18862	0.11294	0.199805	0.135088	967/11315	2
CC	GO:0098803	respiratory chain complex	1933-05-01	87/19520	3.3679e-07	4.84978e-05	3.50971e-05	4535/4513/4519/4538/4536	5
CC	GO:0070469	respirasome	1933-05-01	103/19520	7.82779e-07	5.63601e-05	4.07869e-05	4535/4513/4519/4538/4536	5
CC	GO:0098800	inner mitochondrial membrane protein complex	1933-05-01	142/19520	3.82375e-06	0.000173394	0.000125483	4535/4509/4519/4538/4536	5
CC	GO:0098798	mitochondrial protein-containing complex	1933-06-01	265/19520	4.81651e-06	0.000173394	0.000125483	64087/4535/4509/4519/4538/4536	6
CC	GO:0005746	mitochondrial respirasome	1933-04-01	89/19520	1.49329e-05	0.000430068	0.000311233	4535/4519/4538/4536	4
CC	GO:1990204	oxidoreductase complex	1933-04-01	111/19520	3.56832e-05	0.000856397	0.000619761	4535/4519/4538/4536	4
CC	GO:0005747	mitochondrial respiratory chain complex I	1933-03-01	50/19520	8.17304e-05	0.00130769	0.000946352	4535/4538/4536	3
CC	GO:0030964	NADH dehydrogenase complex	1933-03-01	50/19520	8.17304e-05	0.00130769	0.000946352	4535/4538/4536	3
CC	GO:0045271	respiratory chain complex I	1933-03-01	50/19520	8.17304e-05	0.00130769	0.000946352	4535/4538/4536	3
CC	GO:0005743	mitochondrial inner membrane	1933-06-01	493/19520	0.00015614	0.00224841	0.00162714	4535/4509/4513/4519/4538/4536	6
CC	GO:0032585	multivesicular body membrane	1933-02-01	14/19520	0.000249029	0.00326001	0.00235922	967/6653	2
CC	GO:0070069	cytochrome complex	1933-02-01	36/19520	0.00168441	0.0202129	0.0146278	4513/4519	2
CC	GO:0005771	multivesicular body	1933-02-01	62/19520	0.00491915	0.054489	0.0394328	967/6653	2
CC	GO:0005802	trans-Golgi network	1933-03-01	251/19520	0.00862322	0.088696	0.0641879	6653/27344/22836	3
CC	GO:0031970	organelle envelope lumen	1933-02-01	93/19520	0.0107716	0.103407	0.074834	11315/6653	2
CC	GO:0005641	nuclear envelope lumen	1933-01-01	10/19520	0.0167815	0.126477	0.0915296	6653	1
CC	GO:0044754	autolysosome	1933-01-01	10/19520	0.0167815	0.126477	0.0915296	2512	1
CC	GO:0034774	secretory granule lumen	1933-03-01	322/19520	0.0168348	0.126477	0.0915296	2512/4860/5122	3
CC	GO:0060205	cytoplasmic vesicle lumen	1933-03-01	326/19520	0.0173927	0.126477	0.0915296	2512/4860/5122	3
CC	GO:0031983	vesicle lumen	1933-03-01	328/19520	0.0176755	0.126477	0.0915296	2512/4860/5122	3
CC	GO:0000276	mitochondrial proton-transporting ATP synthase complex, coupling factor F(o)	1933-01-01	11/19520	0.0184446	0.126477	0.0915296	4509	1
CC	GO:0031680	G-protein beta/gamma-subunit complex	1933-01-01	12/19520	0.0201049	0.129696	0.0938593	54331	1
CC	GO:0031902	late endosome membrane	1933-02-01	140/19520	0.023322	0.129696	0.0938593	967/6653	2
CC	GO:0005750	mitochondrial respiratory chain complex III	1933-01-01	14/19520	0.0234174	0.129696	0.0938593	4519	1
CC	GO:0045263	proton-transporting ATP synthase complex, coupling factor F(o)	1933-01-01	14/19520	0.0234174	0.129696	0.0938593	4509	1
CC	GO:0045275	respiratory chain complex III	1933-01-01	14/19520	0.0234174	0.129696	0.0938593	4519	1
CC	GO:0005767	secondary lysosome	1933-01-01	16/19520	0.026719	0.139841	0.101201	2512	1
CC	GO:0005766	primary lysosome	1933-02-01	155/19520	0.0281625	0.139841	0.101201	2512/967	2
CC	GO:0042582	azurophil granule	1933-02-01	155/19520	0.0281625	0.139841	0.101201	2512/967	2
CC	GO:0030133	transport vesicle	1933-03-01	402/19520	0.0299677	0.141008	0.102045	6653/5802/5122	3
CC	GO:0031362	anchored component of external side of plasma membrane	1933-01-01	19/19520	0.0316512	0.141008	0.102045	1946	1
CC	GO:0009898	cytoplasmic side of plasma membrane	1933-02-01	167/19520	0.0323004	0.141008	0.102045	54331/7803	2
CC	GO:0035145	exon-exon junction complex	1933-01-01	20/19520	0.0332899	0.141008	0.102045	23293	1
CC	GO:0042827	platelet dense granule	1933-01-01	21/19520	0.0349258	0.141008	0.102045	967	1
CC	GO:0005697	telomerase holoenzyme complex	1933-01-01	22/19520	0.0365591	0.141008	0.102045	23293	1
CC	GO:0005753	mitochondrial proton-transporting ATP synthase complex	1933-01-01	22/19520	0.0365591	0.141008	0.102045	4509	1
CC	GO:0045277	respiratory chain complex IV	1933-01-01	22/19520	0.0365591	0.141008	0.102045	4513	1
CC	GO:0031233	intrinsic component of external side of plasma membrane	1933-01-01	23/19520	0.0381897	0.141008	0.102045	1946	1
CC	GO:0045259	proton-transporting ATP synthase complex	1933-01-01	23/19520	0.0381897	0.141008	0.102045	4509	1
CC	GO:0033177	proton-transporting two-sector ATPase complex, proton-transporting domain	1933-01-01	24/19520	0.0398177	0.143344	0.103735	4509	1
CC	GO:0098562	cytoplasmic side of membrane	1933-02-01	191/19520	0.0412401	0.144843	0.104821	54331/7803	2
CC	GO:0043025	neuronal cell body	1933-03-01	474/19520	0.0453328	0.153399	0.111013	4535/846/5802	3
CC	GO:0005759	mitochondrial matrix	1933-03-01	476/19520	0.0458067	0.153399	0.111013	11315/64087/10202	3
CC	GO:0030658	transport vesicle membrane	1933-02-01	206/19520	0.0472483	0.154631	0.111904	6653/5802	2
CC	GO:0098793	presynapse	1933-03-01	487/19520	0.0484577	0.155065	0.112218	11315/846/5802	3
CC	GO:0030285	integral component of synaptic vesicle membrane	1933-01-01	31/19520	0.0511386	0.160086	0.115852	5802	1
CC	GO:0005834	heterotrimeric G-protein complex	1933-01-01	34/19520	0.0559507	0.167852	0.121472	54331	1
CC	GO:1905360	GTPase complex	1933-01-01	34/19520	0.0559507	0.167852	0.121472	54331	1
CC	GO:0031904	endosome lumen	1933-01-01	35/19520	0.0575495	0.169125	0.122393	967	1
MF	GO:0009055	electron transfer activity	1934-05-01	138/18337	5.24058e-06	0.00081229	0.000579222	4535/4513/4519/4538/4536	5
MF	GO:0003954	NADH dehydrogenase activity	1934-03-01	45/18337	7.83583e-05	0.00294958	0.00210326	4535/4538/4536	3
MF	GO:0008137	NADH dehydrogenase (ubiquinone) activity	1934-03-01	45/18337	7.83583e-05	0.00294958	0.00210326	4535/4538/4536	3
MF	GO:0050136	NADH dehydrogenase (quinone) activity	1934-03-01	45/18337	7.83583e-05	0.00294958	0.00210326	4535/4538/4536	3
MF	GO:0003955	NAD(P)H dehydrogenase (quinone) activity	1934-03-01	48/18337	9.51477e-05	0.00294958	0.00210326	4535/4538/4536	3
MF	GO:0016655	oxidoreductase activity, acting on NAD(P)H, quinone or similar compound as acceptor	1934-03-01	60/18337	0.00018541	0.00478976	0.00341545	4535/4538/4536	3
MF	GO:0016651	oxidoreductase activity, acting on NAD(P)H	1934-03-01	102/18337	0.000882174	0.0195338	0.0139291	4535/4538/4536	3
MF	GO:0005507	copper ion binding	1934-02-01	60/18337	0.005522	0.106989	0.0762908	11315/4513	2
MF	GO:0035258	steroid hormone receptor binding	1934-02-01	77/18337	0.00895082	0.140259	0.100015	11315/3670	2
MF	GO:0042393	histone binding	1934-03-01	241/18337	0.00993641	0.140259	0.100015	4678/23170/6046	3
MF	GO:0016922	nuclear receptor binding	1934-02-01	97/18337	0.0139181	0.140259	0.100015	11315/3670	2
MF	GO:0004725	protein tyrosine phosphatase activity	1934-02-01	102/18337	0.0153094	0.140259	0.100015	5802/7803	2
MF	GO:0008199	ferric iron binding	1934-01-01	10/18337	0.0183923	0.140259	0.100015	2512	1
MF	GO:0035374	chondroitin sulfate binding	1934-01-01	10/18337	0.0183923	0.140259	0.100015	5802	1
MF	GO:0140299	small molecule sensor activity	1934-01-01	11/18337	0.0202133	0.140259	0.100015	11315	1
MF	GO:0005165	neurotrophin receptor binding	1934-01-01	12/18337	0.0220311	0.140259	0.100015	1946	1
MF	GO:0042301	phosphate ion binding	1934-01-01	12/18337	0.0220311	0.140259	0.100015	4860	1
MF	GO:0015078	proton transmembrane transporter activity	1934-02-01	124/18337	0.022099	0.140259	0.100015	4509/4513	2
MF	GO:0005041	low-density lipoprotein particle receptor activity	1934-01-01	14/18337	0.0256569	0.140259	0.100015	6653	1
MF	GO:0035257	nuclear hormone receptor binding	1934-02-01	140/18337	0.0276829	0.140259	0.100015	11315/3670	2
MF	GO:0042578	phosphoric ester hydrolase activity	1934-03-01	367/18337	0.0301015	0.140259	0.100015	846/5802/7803	3
MF	GO:0030169	low-density lipoprotein particle binding	1934-01-01	17/18337	0.0310711	0.140259	0.100015	6653	1
MF	GO:0030228	lipoprotein particle receptor activity	1934-01-01	17/18337	0.0310711	0.140259	0.100015	6653	1
MF	GO:0043395	heparan sulfate proteoglycan binding	1934-01-01	17/18337	0.0310711	0.140259	0.100015	5802	1
MF	GO:0046933	proton-transporting ATP synthase activity, rotational mechanism	1934-01-01	17/18337	0.0310711	0.140259	0.100015	4509	1
MF	GO:0048038	quinone binding	1934-01-01	18/18337	0.0328693	0.140259	0.100015	4538	1
MF	GO:0140030	modification-dependent protein binding	1934-02-01	157/18337	0.0341692	0.140259	0.100015	23170/6046	2
MF	GO:0030296	protein tyrosine kinase activator activity	1934-01-01	19/18337	0.0346643	0.140259	0.100015	1946	1
MF	GO:0031681	G-protein beta-subunit binding	1934-01-01	20/18337	0.036456	0.140259	0.100015	54331	1
MF	GO:0070182	DNA polymerase binding	1934-01-01	20/18337	0.036456	0.140259	0.100015	23293	1
MF	GO:0016874	ligase activity	1934-02-01	163/18337	0.0365875	0.140259	0.100015	64087/4509	2
MF	GO:0070577	lysine-acetylated histone binding	1934-01-01	21/18337	0.0382446	0.140259	0.100015	6046	1
MF	GO:0140033	acetylation-dependent protein binding	1934-01-01	21/18337	0.0382446	0.140259	0.100015	6046	1
MF	GO:1990381	ubiquitin-specific protease binding	1934-01-01	21/18337	0.0382446	0.140259	0.100015	11315	1
MF	GO:0004252	serine-type endopeptidase activity	1934-02-01	168/18337	0.038652	0.140259	0.100015	5122/11098	2
MF	GO:0070034	telomerase RNA binding	1934-01-01	22/18337	0.0400299	0.140259	0.100015	23293	1
MF	GO:0051427	hormone receptor binding	1934-02-01	173/18337	0.0407605	0.140259	0.100015	11315/3670	2
MF	GO:0035255	ionotropic glutamate receptor binding	1934-01-01	23/18337	0.041812	0.140259	0.100015	4536	1
MF	GO:0004721	phosphoprotein phosphatase activity	1934-02-01	179/18337	0.0433473	0.140259	0.100015	5802/7803	2
MF	GO:0015252	proton channel activity	1934-01-01	24/18337	0.0435909	0.140259	0.100015	4509	1
MF	GO:0004709	MAP kinase kinase kinase activity	1934-01-01	25/18337	0.0453665	0.140259	0.100015	197259	1
MF	GO:0042923	neuropeptide binding	1934-01-01	25/18337	0.0453665	0.140259	0.100015	6653	1
MF	GO:0008236	serine-type peptidase activity	1934-02-01	186/18337	0.0464414	0.140259	0.100015	5122/11098	2
MF	GO:0001223	transcription coactivator binding	1934-01-01	26/18337	0.047139	0.140259	0.100015	2308	1
MF	GO:0004435	phosphatidylinositol phospholipase C activity	1934-01-01	26/18337	0.047139	0.140259	0.100015	846	1
MF	GO:0008198	ferrous iron binding	1934-01-01	26/18337	0.047139	0.140259	0.100015	2512	1
MF	GO:0043425	bHLH transcription factor binding	1934-01-01	26/18337	0.047139	0.140259	0.100015	3670	1
MF	GO:0017171	serine hydrolase activity	1934-02-01	188/18337	0.0473401	0.140259	0.100015	5122/11098	2
MF	GO:0031267	small GTPase binding	1934-02-01	190/18337	0.0482453	0.140259	0.100015	6653/22836	2
MF	GO:0046875	ephrin receptor binding	1934-01-01	27/18337	0.0489083	0.140259	0.100015	1946	1
MF	GO:0004129	cytochrome-c oxidase activity	1934-01-01	28/18337	0.0506744	0.140259	0.100015	4513	1
MF	GO:0004629	phospholipase C activity	1934-01-01	28/18337	0.0506744	0.140259	0.100015	846	1
MF	GO:0015002	heme-copper terminal oxidase activity	1934-01-01	28/18337	0.0506744	0.140259	0.100015	4513	1
MF	GO:0016675	oxidoreductase activity, acting on a heme group of donors	1934-01-01	28/18337	0.0506744	0.140259	0.100015	4513	1
MF	GO:0016676	oxidoreductase activity, acting on a heme group of donors, oxygen as acceptor	1934-01-01	28/18337	0.0506744	0.140259	0.100015	4513	1
MF	GO:0050681	androgen receptor binding	1934-01-01	28/18337	0.0506744	0.140259	0.100015	11315	1
MF	GO:0030332	cyclin binding	1934-01-01	30/18337	0.054197	0.142382	0.101529	3642	1
MF	GO:0071813	lipoprotein particle binding	1934-01-01	30/18337	0.054197	0.142382	0.101529	6653	1
MF	GO:0071814	protein-lipid complex binding	1934-01-01	30/18337	0.054197	0.142382	0.101529	6653	1
MF	GO:0051721	protein phosphatase 2A binding	1934-01-01	31/18337	0.0559536	0.144547	0.103072	2308	1
MF	GO:0051020	GTPase binding	1934-02-01	222/18337	0.0635579	0.159155	0.113489	6653/22836	2
MF	GO:0042162	telomeric DNA binding	1934-01-01	36/18337	0.064689	0.159155	0.113489	23293	1
MF	GO:0043394	proteoglycan binding	1934-01-01	36/18337	0.064689	0.159155	0.113489	5802	1
MF	GO:0019825	oxygen binding	1934-01-01	39/18337	0.0698925	0.166667	0.118846	11315	1
MF	GO:0044390	ubiquitin-like protein conjugating enzyme binding	1934-01-01	39/18337	0.0698925	0.166667	0.118846	11315	1
MF	GO:0030331	estrogen receptor binding	1934-01-01	41/18337	0.0733459	0.169681	0.120995	3670	1
MF	GO:0035254	glutamate receptor binding	1934-01-01	41/18337	0.0733459	0.169681	0.120995	4536	1
MF	GO:0008138	protein tyrosine/serine/threonine phosphatase activity	1934-01-01	45/18337	0.0802154	0.182844	0.130381	7803	1
MF	GO:0001102	RNA polymerase II activating transcription factor binding	1934-01-01	48/18337	0.0853351	0.191695	0.136692	3670	1
MF	GO:0016763	transferase activity, transferring pentosyl groups	1934-01-01	50/18337	0.0887328	0.195764	0.139594	4860	1
MF	GO:0061629	RNA polymerase II-specific DNA-binding transcription factor binding	1934-02-01	271/18337	0.0896725	0.195764	0.139594	11315/3670	2
MF	GO:0016791	phosphatase activity	1934-02-01	276/18337	0.0924948	0.199121	0.141988	5802/7803	2

## Sheet: Table S10
ONTOLOGY	ID	Description	GeneRatio	BgRatio	pvalue	p.adjust	qvalue	geneID	Count
BP	GO:0051085	chaperone cofactor-dependent protein refolding	1971-04-01	34/18862	7.84786e-06	0.0115152	0.00999274	3303/10728/3313/23753	4
BP	GO:0051084	'de novo' posttranslational protein folding	1971-04-01	39/18862	1.37225e-05	0.0115152	0.00999274	3303/10728/3313/23753	4
BP	GO:0006458	'de novo' protein folding	1971-04-01	43/18862	2.03569e-05	0.0115152	0.00999274	3303/10728/3313/23753	4
BP	GO:0042026	protein refolding	1971-03-01	23/18862	8.57512e-05	0.0315097	0.0273437	3303/3313/55466	3
BP	GO:0061077	chaperone-mediated protein folding	1971-04-01	63/18862	9.28395e-05	0.0315097	0.0273437	3303/10728/3313/23753	4
MF	GO:0051082	unfolded protein binding	1969-05-01	120/18337	8.87912e-05	0.024753	0.0212103	3303/10728/80273/3313/55466	5
MF	GO:0051787	misfolded protein binding	1969-03-01	29/18337	0.000173705	0.024753	0.0212103	3303/3313/23753	3
