# Supplementary material for: scGENA: A Single-Cell Gene Coexpression Network Analysis Framework for Clustering Cell Types and Revealing Biological Mechanisms
Source: Bioengineering (Basel). 2022 Jul 30;9(8):353. doi: 10.3390/bioengineering9080353 (PMC9405199; doi:10.3390/bioengineering9080353)
Supplement: Supplementary file 1 [file bioengineering-09-00353-s001.zip › Table S11-S12 PP Cells GO.xlsx]

## Sheet: Table S11
ONTOLOGY	ID	Description	GeneRatio	BgRatio	pvalue	p.adjust	qvalue	geneID	Count
BP	GO:2001233	regulation of apoptotic signaling pathway	2022-05-29	348/18862	0.000171337	0.152319	0.117772	6201/29979/7857/653/3304	5
BP	GO:0043161	proteasome-mediated ubiquitin-dependent protein catabolic process	2022-05-29	425/18862	0.000431036	0.154435	0.119408	29979/3304/4121/57542/11059	5
BP	GO:2001237	negative regulation of extrinsic apoptotic signaling pathway	2022-03-29	103/18862	0.000521153	0.154435	0.119408	7857/653/3304	3
BP	GO:0010498	proteasomal protein catabolic process	2022-05-29	483/18862	0.000770294	0.171198	0.132369	29979/3304/4121/57542/11059	5
BP	GO:2001236	regulation of extrinsic apoptotic signaling pathway	2022-03-29	154/18862	0.0016689	0.177751	0.137436	7857/653/3304	3
BP	GO:0019058	viral life cycle	2022-04-29	348/18862	0.00187844	0.177751	0.137436	129401/5297/3304/11059	4
BP	GO:2000058	regulation of ubiquitin-dependent protein catabolic process	2022-03-29	161/18862	0.0018949	0.177751	0.137436	6201/29979/3304	3
BP	GO:0007595	lactation	2029-02-01	46/18862	0.00226532	0.177751	0.137436	139596/5066	2
BP	GO:0042176	regulation of protein catabolic process	2022-04-29	383/18862	0.00265983	0.177751	0.137436	6201/29979/3304/11059	4
BP	GO:0031396	regulation of protein ubiquitination	2022-03-29	205/18862	0.00375368	0.177751	0.137436	6201/29979/3304	3
BP	GO:1903050	regulation of proteolysis involved in cellular protein catabolic process	2022-03-29	215/18862	0.00428888	0.177751	0.137436	6201/29979/3304	3
BP	GO:0097191	extrinsic apoptotic signaling pathway	2022-03-29	217/18862	0.0044012	0.177751	0.137436	7857/653/3304	3
BP	GO:0009896	positive regulation of catabolic process	2022-04-29	450/18862	0.00473256	0.177751	0.137436	23530/29979/3304/11059	4
BP	GO:2001234	negative regulation of apoptotic signaling pathway	2022-03-29	224/18862	0.00480839	0.177751	0.137436	7857/653/3304	3
BP	GO:0045732	positive regulation of protein catabolic process	2022-03-29	225/18862	0.00486837	0.177751	0.137436	29979/3304/11059	3
BP	GO:1903320	regulation of protein modification by small protein conjugation or removal	2022-03-29	237/18862	0.00562368	0.177751	0.137436	6201/29979/3304	3
BP	GO:0031397	negative regulation of protein ubiquitination	2029-02-01	79/18862	0.00653525	0.177751	0.137436	6201/3304	2
BP	GO:1900034	regulation of cellular response to heat	2029-02-01	79/18862	0.00653525	0.177751	0.137436	129401/3304	2
BP	GO:1990830	cellular response to leukemia inhibitory factor	2029-02-01	79/18862	0.00653525	0.177751	0.137436	129401/4144	2
BP	GO:1903362	regulation of cellular protein catabolic process	2022-03-29	251/18862	0.00658963	0.177751	0.137436	6201/29979/3304	3
BP	GO:0030433	ubiquitin-dependent ERAD pathway	2029-02-01	80/18862	0.00669646	0.177751	0.137436	29979/4121	2
BP	GO:1990823	response to leukemia inhibitory factor	2029-02-01	80/18862	0.00669646	0.177751	0.137436	129401/4144	2
BP	GO:0007589	body fluid secretion	2029-02-01	86/18862	0.00770148	0.177751	0.137436	139596/5066	2
BP	GO:0014020	primary neural tube formation	2029-02-01	88/18862	0.00805072	0.177751	0.137436	6201/653	2
BP	GO:0032436	positive regulation of proteasomal ubiquitin-dependent protein catabolic process	2029-02-01	88/18862	0.00805072	0.177751	0.137436	29979/3304	2
BP	GO:0033273	response to vitamin	2029-02-01	89/18862	0.00822799	0.177751	0.137436	23530/360	2
BP	GO:1903321	negative regulation of protein modification by small protein conjugation or removal	2029-02-01	91/18862	0.00858779	0.177751	0.137436	6201/3304	2
BP	GO:0001841	neural tube formation	2029-02-01	96/18862	0.00951775	0.177751	0.137436	6201/653	2
BP	GO:0036503	ERAD pathway	2029-02-01	102/18862	0.0106904	0.177751	0.137436	29979/4121	2
BP	GO:0045639	positive regulation of myeloid cell differentiation	2029-02-01	102/18862	0.0106904	0.177751	0.137436	2778/3304	2
BP	GO:2000060	positive regulation of ubiquitin-dependent protein catabolic process	2029-02-01	104/18862	0.0110948	0.177751	0.137436	29979/3304	2
BP	GO:0060562	epithelial tube morphogenesis	2022-03-29	309/18862	0.0116106	0.177751	0.137436	6201/653/9723	3
BP	GO:1901800	positive regulation of proteasomal protein catabolic process	2029-02-01	109/18862	0.0121351	0.177751	0.137436	29979/3304	2
BP	GO:0001838	embryonic epithelial tube formation	2029-02-01	114/18862	0.0132166	0.177751	0.137436	6201/653	2
BP	GO:0034605	cellular response to heat	2029-02-01	120/18862	0.014568	0.177751	0.137436	129401/3304	2
BP	GO:0045047	protein targeting to ER	2029-02-01	120/18862	0.014568	0.177751	0.137436	6201/4121	2
BP	GO:0042476	odontogenesis	2029-02-01	123/18862	0.0152653	0.177751	0.137436	5066/360	2
BP	GO:0006222	UMP biosynthetic process	2022-01-29	10/18862	0.0152725	0.177751	0.137436	139596	1
BP	GO:0007191	adenylate cyclase-activating dopamine receptor signaling pathway	2022-01-29	10/18862	0.0152725	0.177751	0.137436	2778	1
BP	GO:0009174	pyrimidine ribonucleoside monophosphate biosynthetic process	2022-01-29	10/18862	0.0152725	0.177751	0.137436	139596	1
BP	GO:0031943	regulation of glucocorticoid metabolic process	2022-01-29	10/18862	0.0152725	0.177751	0.137436	653	1
BP	GO:0032341	aldosterone metabolic process	2022-01-29	10/18862	0.0152725	0.177751	0.137436	653	1
BP	GO:0032342	aldosterone biosynthetic process	2022-01-29	10/18862	0.0152725	0.177751	0.137436	653	1
BP	GO:0032351	negative regulation of hormone metabolic process	2022-01-29	10/18862	0.0152725	0.177751	0.137436	653	1
BP	GO:0033483	gas homeostasis	2022-01-29	10/18862	0.0152725	0.177751	0.137436	23530	1
BP	GO:0034350	regulation of glial cell apoptotic process	2022-01-29	10/18862	0.0152725	0.177751	0.137436	9590	1
BP	GO:0034651	cortisol biosynthetic process	2022-01-29	10/18862	0.0152725	0.177751	0.137436	653	1
BP	GO:0044803	multi-organism membrane organization	2022-01-29	10/18862	0.0152725	0.177751	0.137436	5297	1
BP	GO:0072537	fibroblast activation	2022-01-29	10/18862	0.0152725	0.177751	0.137436	9590	1
BP	GO:0090030	regulation of steroid hormone biosynthetic process	2022-01-29	10/18862	0.0152725	0.177751	0.137436	653	1
BP	GO:1902645	tertiary alcohol biosynthetic process	2022-01-29	10/18862	0.0152725	0.177751	0.137436	653	1
BP	GO:0072599	establishment of protein localization to endoplasmic reticulum	2029-02-01	124/18862	0.0155009	0.177751	0.137436	6201/4121	2
BP	GO:0072175	epithelial tube formation	2029-02-01	125/18862	0.0157381	0.177751	0.137436	6201/653	2
BP	GO:0001666	response to hypoxia	2022-03-29	348/18862	0.0159532	0.177751	0.137436	5066/29979/360	3
BP	GO:1903052	positive regulation of proteolysis involved in cellular protein catabolic process	2029-02-01	127/18862	0.0162171	0.177751	0.137436	29979/3304	2
BP	GO:0006558	L-phenylalanine metabolic process	2022-01-29	11/18862	0.0167873	0.177751	0.137436	80150	1
BP	GO:0006559	L-phenylalanine catabolic process	2022-01-29	11/18862	0.0167873	0.177751	0.137436	80150	1
BP	GO:0010739	positive regulation of protein kinase A signaling	2022-01-29	11/18862	0.0167873	0.177751	0.137436	9590	1
BP	GO:0010918	positive regulation of mitochondrial membrane potential	2022-01-29	11/18862	0.0167873	0.177751	0.137436	23530	1
BP	GO:0031223	auditory behavior	2022-01-29	11/18862	0.0167873	0.177751	0.137436	84189	1
BP	GO:0034650	cortisol metabolic process	2022-01-29	11/18862	0.0167873	0.177751	0.137436	653	1
BP	GO:0090084	negative regulation of inclusion body assembly	2022-01-29	11/18862	0.0167873	0.177751	0.137436	3304	1
BP	GO:1902221	erythrose 4-phosphate/phosphoenolpyruvate family amino acid metabolic process	2022-01-29	11/18862	0.0167873	0.177751	0.137436	80150	1
BP	GO:1902222	erythrose 4-phosphate/phosphoenolpyruvate family amino acid catabolic process	2022-01-29	11/18862	0.0167873	0.177751	0.137436	80150	1
BP	GO:1903265	positive regulation of tumor necrosis factor-mediated signaling pathway	2022-01-29	11/18862	0.0167873	0.177751	0.137436	3304	1
BP	GO:0035264	multicellular organism growth	2029-02-01	130/18862	0.0169473	0.177751	0.137436	84189/2778	2
BP	GO:0010977	negative regulation of neuron projection development	2029-02-01	132/18862	0.0174419	0.177751	0.137436	9723/1809	2
BP	GO:0030879	mammary gland development	2029-02-01	132/18862	0.0174419	0.177751	0.137436	139596/5066	2
BP	GO:0032434	regulation of proteasomal ubiquitin-dependent protein catabolic process	2029-02-01	132/18862	0.0174419	0.177751	0.137436	29979/3304	2
BP	GO:0036293	response to decreased oxygen levels	2022-03-29	360/18862	0.0174506	0.177751	0.137436	5066/29979/360	3
BP	GO:0006465	signal peptide processing	2022-01-29	12/18862	0.0182999	0.177751	0.137436	90701	1
BP	GO:0007638	mechanosensory behavior	2022-01-29	12/18862	0.0182999	0.177751	0.137436	84189	1
BP	GO:0009886	post-embryonic animal morphogenesis	2022-01-29	12/18862	0.0182999	0.177751	0.137436	2778	1
BP	GO:0015791	polyol transport	2022-01-29	12/18862	0.0182999	0.177751	0.137436	360	1
BP	GO:0009306	protein secretion	2022-03-29	367/18862	0.0183595	0.177751	0.137436	5066/7857/6833	3
BP	GO:0035592	establishment of protein localization to extracellular region	2022-03-29	368/18862	0.0184915	0.177751	0.137436	5066/7857/6833	3
BP	GO:0071692	protein localization to extracellular region	2022-03-29	375/18862	0.0194304	0.177751	0.137436	5066/7857/6833	3
BP	GO:0016331	morphogenesis of embryonic epithelium	2029-02-01	140/18862	0.0194809	0.177751	0.137436	6201/653	2
BP	GO:0035148	tube formation	2029-02-01	140/18862	0.0194809	0.177751	0.137436	6201/653	2
BP	GO:0046718	viral entry into host cell	2029-02-01	140/18862	0.0194809	0.177751	0.137436	3304/11059	2
BP	GO:0040013	negative regulation of locomotion	2022-03-29	377/18862	0.0197034	0.177751	0.137436	653/9723/1809	3
BP	GO:0006705	mineralocorticoid biosynthetic process	2022-01-29	13/18862	0.0198102	0.177751	0.137436	653	1
BP	GO:0008212	mineralocorticoid metabolic process	2022-01-29	13/18862	0.0198102	0.177751	0.137436	653	1
BP	GO:0019755	one-carbon compound transport	2022-01-29	13/18862	0.0198102	0.177751	0.137436	360	1
BP	GO:0034309	primary alcohol biosynthetic process	2022-01-29	13/18862	0.0198102	0.177751	0.137436	653	1
BP	GO:0051764	actin crosslink formation	2022-01-29	13/18862	0.0198102	0.177751	0.137436	1809	1
BP	GO:0070424	regulation of nucleotide-binding oligomerization domain containing signaling pathway	2022-01-29	13/18862	0.0198102	0.177751	0.137436	3304	1
BP	GO:1904294	positive regulation of ERAD pathway	2022-01-29	13/18862	0.0198102	0.177751	0.137436	29979	1
BP	GO:0031331	positive regulation of cellular catabolic process	2022-03-29	384/18862	0.0206761	0.177751	0.137436	23530/29979/3304	3
BP	GO:0021915	neural tube development	2029-02-01	145/18862	0.020804	0.177751	0.137436	6201/653	2
BP	GO:0070482	response to oxygen levels	2022-03-29	385/18862	0.0208171	0.177751	0.137436	5066/29979/360	3
BP	GO:0006999	nuclear pore organization	2022-01-29	14/18862	0.0213182	0.177751	0.137436	129401	1
BP	GO:0009130	pyrimidine nucleoside monophosphate biosynthetic process	2022-01-29	14/18862	0.0213182	0.177751	0.137436	139596	1
BP	GO:0009173	pyrimidine ribonucleoside monophosphate metabolic process	2022-01-29	14/18862	0.0213182	0.177751	0.137436	139596	1
BP	GO:0034349	glial cell apoptotic process	2022-01-29	14/18862	0.0213182	0.177751	0.137436	9590	1
BP	GO:0046049	UMP metabolic process	2022-01-29	14/18862	0.0213182	0.177751	0.137436	139596	1
BP	GO:0050930	induction of positive chemotaxis	2022-01-29	14/18862	0.0213182	0.177751	0.137436	7857	1
BP	GO:0060004	reflex	2022-01-29	14/18862	0.0213182	0.177751	0.137436	84189	1
BP	GO:1903364	positive regulation of cellular protein catabolic process	2029-02-01	150/18862	0.0221639	0.177751	0.137436	29979/3304	2
BP	GO:0070972	protein localization to endoplasmic reticulum	2029-02-01	152/18862	0.022718	0.177751	0.137436	6201/4121	2
BP	GO:0009404	toxin metabolic process	2022-01-29	15/18862	0.0228241	0.177751	0.137436	5066	1
BP	GO:0010763	positive regulation of fibroblast migration	2022-01-29	15/18862	0.0228241	0.177751	0.137436	9590	1
BP	GO:0046184	aldehyde biosynthetic process	2022-01-29	15/18862	0.0228241	0.177751	0.137436	653	1
BP	GO:0046500	S-adenosylmethionine metabolic process	2022-01-29	15/18862	0.0228241	0.177751	0.137436	4144	1
BP	GO:0051770	positive regulation of nitric-oxide synthase biosynthetic process	2022-01-29	15/18862	0.0228241	0.177751	0.137436	9590	1
BP	GO:1900006	positive regulation of dendrite development	2022-01-29	15/18862	0.0228241	0.177751	0.137436	653	1
BP	GO:0010976	positive regulation of neuron projection development	2029-02-01	153/18862	0.0229972	0.177751	0.137436	653/1809	2
BP	GO:0044409	entry into host	2029-02-01	153/18862	0.0229972	0.177751	0.137436	3304/11059	2
BP	GO:0002790	peptide secretion	2022-03-29	401/18862	0.0231477	0.177751	0.137436	5066/7857/6833	3
BP	GO:0002093	auditory receptor cell morphogenesis	2022-01-29	16/18862	0.0243277	0.177751	0.137436	84189	1
BP	GO:0044764	multi-organism cellular process	2022-01-29	16/18862	0.0243277	0.177751	0.137436	5297	1
BP	GO:0045838	positive regulation of membrane potential	2022-01-29	16/18862	0.0243277	0.177751	0.137436	23530	1
BP	GO:0051444	negative regulation of ubiquitin-protein transferase activity	2022-01-29	16/18862	0.0243277	0.177751	0.137436	6201	1
BP	GO:0070431	nucleotide-binding oligomerization domain containing 2 signaling pathway	2022-01-29	16/18862	0.0243277	0.177751	0.137436	3304	1
BP	GO:0090036	regulation of protein kinase C signaling	2022-01-29	16/18862	0.0243277	0.177751	0.137436	9590	1
BP	GO:0090083	regulation of inclusion body assembly	2022-01-29	16/18862	0.0243277	0.177751	0.137436	3304	1
BP	GO:1902931	negative regulation of alcohol biosynthetic process	2022-01-29	16/18862	0.0243277	0.177751	0.137436	653	1
BP	GO:0048568	embryonic organ development	2022-03-29	412/18862	0.02483	0.177751	0.137436	84189/2778/653	3
BP	GO:2001242	regulation of intrinsic apoptotic signaling pathway	2029-02-01	160/18862	0.0249914	0.177751	0.137436	6201/29979	2
BP	GO:0009408	response to heat	2029-02-01	161/18862	0.025282	0.177751	0.137436	129401/3304	2
BP	GO:0010566	regulation of ketone biosynthetic process	2022-01-29	17/18862	0.025829	0.177751	0.137436	653	1
BP	GO:0043116	negative regulation of vascular permeability	2022-01-29	17/18862	0.025829	0.177751	0.137436	9590	1
BP	GO:0051382	kinetochore assembly	2022-01-29	17/18862	0.025829	0.177751	0.137436	23126	1
BP	GO:0007584	response to nutrient	2029-02-01	165/18862	0.0264579	0.177751	0.137436	23530/360	2
BP	GO:0048736	appendage development	2029-02-01	167/18862	0.0270542	0.177751	0.137436	5066/2778	2
BP	GO:0060173	limb development	2029-02-01	167/18862	0.0270542	0.177751	0.137436	5066/2778	2
BP	GO:0006704	glucocorticoid biosynthetic process	2022-01-29	18/18862	0.0273281	0.177751	0.137436	653	1
BP	GO:0006740	NADPH regeneration	2022-01-29	18/18862	0.0273281	0.177751	0.137436	23530	1
BP	GO:0070293	renal absorption	2022-01-29	18/18862	0.0273281	0.177751	0.137436	360	1
BP	GO:1901673	regulation of mitotic spindle assembly	2022-01-29	18/18862	0.0273281	0.177751	0.137436	3304	1
BP	GO:0010975	regulation of neuron projection development	2022-03-29	428/18862	0.0273932	0.177751	0.137436	653/9723/1809	3
BP	GO:0006491	N-glycan processing	2022-01-29	19/18862	0.028825	0.177751	0.137436	4121	1
BP	GO:0009129	pyrimidine nucleoside monophosphate metabolic process	2022-01-29	19/18862	0.028825	0.177751	0.137436	139596	1
BP	GO:0048245	eosinophil chemotaxis	2022-01-29	19/18862	0.028825	0.177751	0.137436	7857	1
BP	GO:0060117	auditory receptor cell development	2022-01-29	19/18862	0.028825	0.177751	0.137436	84189	1
BP	GO:1904292	regulation of ERAD pathway	2022-01-29	19/18862	0.028825	0.177751	0.137436	29979	1
BP	GO:0052126	movement in host environment	2029-02-01	175/18862	0.0294935	0.177751	0.137436	3304/11059	2
BP	GO:0007565	female pregnancy	2029-02-01	177/18862	0.0301167	0.177751	0.137436	139596/5066	2
BP	GO:0003323	type B pancreatic cell development	2022-01-29	20/18862	0.0303197	0.177751	0.137436	653	1
BP	GO:0006607	NLS-bearing protein import into nucleus	2022-01-29	20/18862	0.0303197	0.177751	0.137436	129401	1
BP	GO:0009074	aromatic amino acid family catabolic process	2022-01-29	20/18862	0.0303197	0.177751	0.137436	80150	1
BP	GO:0010310	regulation of hydrogen peroxide metabolic process	2022-01-29	20/18862	0.0303197	0.177751	0.137436	23530	1
BP	GO:0046885	regulation of hormone biosynthetic process	2022-01-29	20/18862	0.0303197	0.177751	0.137436	653	1
BP	GO:0051767	nitric-oxide synthase biosynthetic process	2022-01-29	20/18862	0.0303197	0.177751	0.137436	9590	1
BP	GO:0051769	regulation of nitric-oxide synthase biosynthetic process	2022-01-29	20/18862	0.0303197	0.177751	0.137436	9590	1
BP	GO:0060039	pericardium development	2022-01-29	20/18862	0.0303197	0.177751	0.137436	653	1
BP	GO:0060713	labyrinthine layer morphogenesis	2022-01-29	20/18862	0.0303197	0.177751	0.137436	653	1
BP	GO:1902644	tertiary alcohol metabolic process	2022-01-29	20/18862	0.0303197	0.177751	0.137436	653	1
BP	GO:0019083	viral transcription	2029-02-01	180/18862	0.0310614	0.177751	0.137436	129401/6201	2
BP	GO:0031345	negative regulation of cell projection organization	2029-02-01	180/18862	0.0310614	0.177751	0.137436	9723/1809	2
BP	GO:0061136	regulation of proteasomal protein catabolic process	2029-02-01	182/18862	0.0316978	0.177751	0.137436	29979/3304	2
BP	GO:0006833	water transport	2022-01-29	21/18862	0.0318121	0.177751	0.137436	360	1
BP	GO:0036507	protein demannosylation	2022-01-29	21/18862	0.0318121	0.177751	0.137436	4121	1
BP	GO:0036508	protein alpha-1,2-demannosylation	2022-01-29	21/18862	0.0318121	0.177751	0.137436	4121	1
BP	GO:0030308	negative regulation of cell growth	2029-02-01	185/18862	0.032662	0.177751	0.137436	3304/9723	2
BP	GO:0051216	cartilage development	2029-02-01	185/18862	0.032662	0.177751	0.137436	2778/653	2
BP	GO:0009220	pyrimidine ribonucleotide biosynthetic process	2022-01-29	22/18862	0.0333024	0.177751	0.137436	139596	1
BP	GO:0051383	kinetochore organization	2022-01-29	22/18862	0.0333024	0.177751	0.137436	23126	1
BP	GO:1901798	positive regulation of signal transduction by p53 class mediator	2022-01-29	22/18862	0.0333024	0.177751	0.137436	6201	1
BP	GO:0050821	protein stabilization	2029-02-01	191/18862	0.0346251	0.177751	0.137436	6201/3304	2
BP	GO:1901605	alpha-amino acid metabolic process	2029-02-01	191/18862	0.0346251	0.177751	0.137436	84680/80150	2
BP	GO:0001964	startle response	2022-01-29	23/18862	0.0347904	0.177751	0.137436	84189	1
BP	GO:0009068	aspartate family amino acid catabolic process	2022-01-29	23/18862	0.0347904	0.177751	0.137436	80150	1
BP	GO:0010738	regulation of protein kinase A signaling	2022-01-29	23/18862	0.0347904	0.177751	0.137436	9590	1
BP	GO:0010996	response to auditory stimulus	2022-01-29	23/18862	0.0347904	0.177751	0.137436	84189	1
BP	GO:0042026	protein refolding	2022-01-29	23/18862	0.0347904	0.177751	0.137436	3304	1
BP	GO:0060384	innervation	2022-01-29	23/18862	0.0347904	0.177751	0.137436	84189	1
BP	GO:0060571	morphogenesis of an epithelial fold	2022-01-29	23/18862	0.0347904	0.177751	0.137436	653	1
BP	GO:0070841	inclusion body assembly	2022-01-29	23/18862	0.0347904	0.177751	0.137436	3304	1
BP	GO:0071577	zinc ion transmembrane transport	2022-01-29	23/18862	0.0347904	0.177751	0.137436	25800	1
BP	GO:0071676	negative regulation of mononuclear cell migration	2022-01-29	23/18862	0.0347904	0.177751	0.137436	653	1
BP	GO:0072677	eosinophil migration	2022-01-29	23/18862	0.0347904	0.177751	0.137436	7857	1
BP	GO:0120255	olefinic compound biosynthetic process	2022-01-29	23/18862	0.0347904	0.177751	0.137436	653	1
BP	GO:1904666	regulation of ubiquitin protein ligase activity	2022-01-29	23/18862	0.0347904	0.177751	0.137436	6201	1
BP	GO:0001667	ameboidal-type cell migration	2022-03-29	473/18862	0.0353399	0.178174	0.137763	7857/9590/9723	3
BP	GO:0003272	endocardial cushion formation	2022-01-29	24/18862	0.0362762	0.178174	0.137763	653	1
BP	GO:0003309	type B pancreatic cell differentiation	2022-01-29	24/18862	0.0362762	0.178174	0.137763	653	1
BP	GO:0043567	regulation of insulin-like growth factor receptor signaling pathway	2022-01-29	24/18862	0.0362762	0.178174	0.137763	653	1
BP	GO:0051291	protein heterooligomerization	2022-01-29	24/18862	0.0362762	0.178174	0.137763	4144	1
BP	GO:0060037	pharyngeal system development	2022-01-29	24/18862	0.0362762	0.178174	0.137763	653	1
BP	GO:0060669	embryonic placenta morphogenesis	2022-01-29	24/18862	0.0362762	0.178174	0.137763	653	1
BP	GO:0019080	viral gene expression	2029-02-01	198/18862	0.0369725	0.17951	0.138796	129401/6201	2
BP	GO:0002068	glandular epithelial cell development	2022-01-29	25/18862	0.0377598	0.17951	0.138796	653	1
BP	GO:0008211	glucocorticoid metabolic process	2022-01-29	25/18862	0.0377598	0.17951	0.138796	653	1
BP	GO:0050927	positive regulation of positive chemotaxis	2022-01-29	25/18862	0.0377598	0.17951	0.138796	7857	1
BP	GO:0071514	genetic imprinting	2022-01-29	25/18862	0.0377598	0.17951	0.138796	2778	1
BP	GO:0090169	regulation of spindle assembly	2022-01-29	25/18862	0.0377598	0.17951	0.138796	3304	1
BP	GO:0050679	positive regulation of epithelial cell proliferation	2029-02-01	203/18862	0.0386862	0.180753	0.139757	7857/653	2
BP	GO:0044706	multi-multicellular organism process	2029-02-01	204/18862	0.0390326	0.180753	0.139757	139596/5066	2
BP	GO:0006700	C21-steroid hormone biosynthetic process	2022-01-29	26/18862	0.0392412	0.180753	0.139757	653	1
BP	GO:0010894	negative regulation of steroid biosynthetic process	2022-01-29	26/18862	0.0392412	0.180753	0.139757	653	1
BP	GO:0048843	negative regulation of axon extension involved in axon guidance	2022-01-29	26/18862	0.0392412	0.180753	0.139757	9723	1
BP	GO:0050926	regulation of positive chemotaxis	2022-01-29	26/18862	0.0392412	0.180753	0.139757	7857	1
BP	GO:0071456	cellular response to hypoxia	2029-02-01	206/18862	0.0397289	0.181002	0.139949	29979/360	2
BP	GO:0002064	epithelial cell development	2029-02-01	207/18862	0.0400789	0.181002	0.139949	84189/653	2
BP	GO:0006829	zinc ion transport	2022-01-29	27/18862	0.0407204	0.181002	0.139949	25800	1
BP	GO:0007064	mitotic sister chromatid cohesion	2022-01-29	27/18862	0.0407204	0.181002	0.139949	23126	1
BP	GO:0009065	glutamine family amino acid catabolic process	2022-01-29	27/18862	0.0407204	0.181002	0.139949	80150	1
BP	GO:0035116	embryonic hindlimb morphogenesis	2022-01-29	27/18862	0.0407204	0.181002	0.139949	2778	1
BP	GO:0045672	positive regulation of osteoclast differentiation	2022-01-29	27/18862	0.0407204	0.181002	0.139949	2778	1
BP	GO:0001958	endochondral ossification	2022-01-29	28/18862	0.0421974	0.182104	0.140802	2778	1
BP	GO:0006516	glycoprotein catabolic process	2022-01-29	28/18862	0.0421974	0.182104	0.140802	4121	1
BP	GO:0035883	enteroendocrine cell differentiation	2022-01-29	28/18862	0.0421974	0.182104	0.140802	653	1
BP	GO:0036075	replacement ossification	2022-01-29	28/18862	0.0421974	0.182104	0.140802	2778	1
BP	GO:1902175	regulation of oxidative stress-induced intrinsic apoptotic signaling pathway	2022-01-29	28/18862	0.0421974	0.182104	0.140802	29979	1
BP	GO:1902253	regulation of intrinsic apoptotic signaling pathway by p53 class mediator	2022-01-29	28/18862	0.0421974	0.182104	0.140802	6201	1
BP	GO:0036294	cellular response to decreased oxygen levels	2029-02-01	214/18862	0.0425618	0.182789	0.141331	29979/360	2
BP	GO:0006517	protein deglycosylation	2022-01-29	29/18862	0.0436722	0.183607	0.141963	4121	1
BP	GO:0009218	pyrimidine ribonucleotide metabolic process	2022-01-29	29/18862	0.0436722	0.183607	0.141963	139596	1
BP	GO:0031116	positive regulation of microtubule polymerization	2022-01-29	29/18862	0.0436722	0.183607	0.141963	3304	1
BP	GO:0045939	negative regulation of steroid metabolic process	2022-01-29	29/18862	0.0436722	0.183607	0.141963	653	1
BP	GO:0051701	biological process involved in interaction with host	2029-02-01	219/18862	0.0443701	0.183607	0.141963	3304/11059	2
BP	GO:0006221	pyrimidine nucleotide biosynthetic process	2022-01-29	30/18862	0.0451448	0.183607	0.141963	139596	1
BP	GO:0007020	microtubule nucleation	2022-01-29	30/18862	0.0451448	0.183607	0.141963	3304	1
BP	GO:0051491	positive regulation of filopodium assembly	2022-01-29	30/18862	0.0451448	0.183607	0.141963	1809	1
BP	GO:0061384	heart trabecula morphogenesis	2022-01-29	30/18862	0.0451448	0.183607	0.141963	653	1
BP	GO:0070528	protein kinase C signaling	2022-01-29	30/18862	0.0451448	0.183607	0.141963	9590	1
BP	GO:0050920	regulation of chemotaxis	2029-02-01	224/18862	0.046207	0.183607	0.141963	7857/9723	2
BP	GO:0042044	fluid transport	2022-01-29	31/18862	0.0466152	0.183607	0.141963	360	1
BP	GO:0042744	hydrogen peroxide catabolic process	2022-01-29	31/18862	0.0466152	0.183607	0.141963	23530	1
BP	GO:0099174	regulation of presynapse organization	2022-01-29	31/18862	0.0466152	0.183607	0.141963	84189	1
BP	GO:1905606	regulation of presynapse assembly	2022-01-29	31/18862	0.0466152	0.183607	0.141963	84189	1
BP	GO:0032886	regulation of microtubule-based process	2029-02-01	227/18862	0.0473226	0.183607	0.141963	3304/57542	2
BP	GO:0009266	response to temperature stimulus	2029-02-01	228/18862	0.0476967	0.183607	0.141963	129401/3304	2
BP	GO:0009072	aromatic amino acid family metabolic process	2022-01-29	32/18862	0.0480834	0.183607	0.141963	80150	1
BP	GO:0045648	positive regulation of erythrocyte differentiation	2022-01-29	32/18862	0.0480834	0.183607	0.141963	3304	1
BP	GO:0048841	regulation of axon extension involved in axon guidance	2022-01-29	32/18862	0.0480834	0.183607	0.141963	9723	1
BP	GO:1901099	negative regulation of signal transduction in absence of ligand	2022-01-29	32/18862	0.0480834	0.183607	0.141963	3304	1
BP	GO:2001240	negative regulation of extrinsic apoptotic signaling pathway in absence of ligand	2022-01-29	32/18862	0.0480834	0.183607	0.141963	3304	1
BP	GO:0007188	adenylate cyclase-modulating G protein-coupled receptor signaling pathway	2029-02-01	230/18862	0.0484482	0.183607	0.141963	2778/9590	2
BP	GO:0048762	mesenchymal cell differentiation	2029-02-01	231/18862	0.0488255	0.183607	0.141963	653/9723	2
BP	GO:0071453	cellular response to oxygen levels	2029-02-01	231/18862	0.0488255	0.183607	0.141963	29979/360	2
BP	GO:0003203	endocardial cushion morphogenesis	2022-01-29	33/18862	0.0495494	0.183607	0.141963	653	1
BP	GO:0031112	positive regulation of microtubule polymerization or depolymerization	2022-01-29	33/18862	0.0495494	0.183607	0.141963	3304	1
BP	GO:0032350	regulation of hormone metabolic process	2022-01-29	33/18862	0.0495494	0.183607	0.141963	653	1
BP	GO:1901020	negative regulation of calcium ion transmembrane transporter activity	2022-01-29	33/18862	0.0495494	0.183607	0.141963	29979	1
BP	GO:0001569	branching involved in blood vessel morphogenesis	2022-01-29	34/18862	0.0510133	0.183607	0.141963	9723	1
BP	GO:0006099	tricarboxylic acid cycle	2022-01-29	34/18862	0.0510133	0.183607	0.141963	23530	1
BP	GO:0006409	tRNA export from nucleus	2022-01-29	34/18862	0.0510133	0.183607	0.141963	129401	1
BP	GO:0009156	ribonucleoside monophosphate biosynthetic process	2022-01-29	34/18862	0.0510133	0.183607	0.141963	139596	1
BP	GO:0033280	response to vitamin D	2022-01-29	34/18862	0.0510133	0.183607	0.141963	360	1
BP	GO:0035137	hindlimb morphogenesis	2022-01-29	34/18862	0.0510133	0.183607	0.141963	2778	1
BP	GO:0042491	inner ear auditory receptor cell differentiation	2022-01-29	34/18862	0.0510133	0.183607	0.141963	84189	1
BP	GO:0044060	regulation of endocrine process	2022-01-29	34/18862	0.0510133	0.183607	0.141963	2778	1
BP	GO:0051085	chaperone cofactor-dependent protein refolding	2022-01-29	34/18862	0.0510133	0.183607	0.141963	3304	1
BP	GO:0071431	tRNA-containing ribonucleoprotein complex export from nucleus	2022-01-29	34/18862	0.0510133	0.183607	0.141963	129401	1
BP	GO:2000352	negative regulation of endothelial cell apoptotic process	2022-01-29	34/18862	0.0510133	0.183607	0.141963	7857	1
BP	GO:0006739	NADP metabolic process	2022-01-29	35/18862	0.052475	0.184388	0.142568	23530	1
BP	GO:0010762	regulation of fibroblast migration	2022-01-29	35/18862	0.052475	0.184388	0.142568	9590	1
BP	GO:0039694	viral RNA genome replication	2022-01-29	35/18862	0.052475	0.184388	0.142568	5297	1
BP	GO:0048009	insulin-like growth factor receptor signaling pathway	2022-01-29	35/18862	0.052475	0.184388	0.142568	653	1
BP	GO:0060236	regulation of mitotic spindle organization	2022-01-29	35/18862	0.052475	0.184388	0.142568	3304	1
BP	GO:1905898	positive regulation of response to endoplasmic reticulum stress	2022-01-29	35/18862	0.052475	0.184388	0.142568	29979	1
BP	GO:0061448	connective tissue development	2029-02-01	243/18862	0.0534382	0.187034	0.144613	2778/653	2
BP	GO:0045926	negative regulation of growth	2029-02-01	245/18862	0.0542217	0.189032	0.146158	3304/9723	2
BP	GO:0010737	protein kinase A signaling	2022-01-29	37/18862	0.0553918	0.190129	0.147006	9590	1
BP	GO:0048846	axon extension involved in axon guidance	2022-01-29	37/18862	0.0553918	0.190129	0.147006	9723	1
BP	GO:0051031	tRNA transport	2022-01-29	37/18862	0.0553918	0.190129	0.147006	129401	1
BP	GO:1902284	neuron projection extension involved in neuron projection guidance	2022-01-29	37/18862	0.0553918	0.190129	0.147006	9723	1
BP	GO:0003091	renal water homeostasis	2022-01-29	38/18862	0.056847	0.191196	0.147831	360	1
BP	GO:0006882	cellular zinc ion homeostasis	2022-01-29	38/18862	0.056847	0.191196	0.147831	25800	1
BP	GO:0097064	ncRNA export from nucleus	2022-01-29	38/18862	0.056847	0.191196	0.147831	129401	1
BP	GO:2000249	regulation of actin cytoskeleton reorganization	2022-01-29	38/18862	0.056847	0.191196	0.147831	9723	1
BP	GO:0002066	columnar/cuboidal epithelial cell development	2022-01-29	39/18862	0.0583	0.191196	0.147831	653	1
BP	GO:0051084	'de novo' posttranslational protein folding	2022-01-29	39/18862	0.0583	0.191196	0.147831	3304	1
BP	GO:0090224	regulation of spindle organization	2022-01-29	39/18862	0.0583	0.191196	0.147831	3304	1
BP	GO:1903170	negative regulation of calcium ion transmembrane transport	2022-01-29	39/18862	0.0583	0.191196	0.147831	29979	1
BP	GO:0045637	regulation of myeloid cell differentiation	2029-02-01	258/18862	0.0594146	0.191196	0.147831	2778/3304	2
BP	GO:0006730	one-carbon metabolic process	2022-01-29	40/18862	0.0597509	0.191196	0.147831	4144	1
BP	GO:0007212	dopamine receptor signaling pathway	2022-01-29	40/18862	0.0597509	0.191196	0.147831	2778	1
BP	GO:0008207	C21-steroid hormone metabolic process	2022-01-29	40/18862	0.0597509	0.191196	0.147831	653	1
BP	GO:0010719	negative regulation of epithelial to mesenchymal transition	2022-01-29	40/18862	0.0597509	0.191196	0.147831	653	1
BP	GO:0055069	zinc ion homeostasis	2022-01-29	40/18862	0.0597509	0.191196	0.147831	25800	1
BP	GO:0070423	nucleotide-binding oligomerization domain containing signaling pathway	2022-01-29	40/18862	0.0597509	0.191196	0.147831	3304	1
BP	GO:0071526	semaphorin-plexin signaling pathway	2022-01-29	40/18862	0.0597509	0.191196	0.147831	9723	1
BP	GO:0072528	pyrimidine-containing compound biosynthetic process	2022-01-29	40/18862	0.0597509	0.191196	0.147831	139596	1
BP	GO:0046883	regulation of hormone secretion	2029-02-01	260/18862	0.0602285	0.191196	0.147831	2778/6833	2
BP	GO:0001953	negative regulation of cell-matrix adhesion	2022-01-29	41/18862	0.0611996	0.191196	0.147831	9723	1
BP	GO:0009268	response to pH	2022-01-29	41/18862	0.0611996	0.191196	0.147831	5066	1
BP	GO:0035872	nucleotide-binding domain, leucine rich repeat containing receptor signaling pathway	2022-01-29	41/18862	0.0611996	0.191196	0.147831	3304	1
BP	GO:0051602	response to electrical stimulus	2022-01-29	41/18862	0.0611996	0.191196	0.147831	9590	1
BP	GO:0060119	inner ear receptor cell development	2022-01-29	41/18862	0.0611996	0.191196	0.147831	84189	1
BP	GO:0097352	autophagosome maturation	2022-01-29	41/18862	0.0611996	0.191196	0.147831	29979	1
BP	GO:1902042	negative regulation of extrinsic apoptotic signaling pathway via death domain receptors	2022-01-29	41/18862	0.0611996	0.191196	0.147831	653	1
BP	GO:0003197	endocardial cushion development	2022-01-29	42/18862	0.0626461	0.191196	0.147831	653	1
BP	GO:0042181	ketone biosynthetic process	2022-01-29	42/18862	0.0626461	0.191196	0.147831	653	1
BP	GO:0043114	regulation of vascular permeability	2022-01-29	42/18862	0.0626461	0.191196	0.147831	9590	1
BP	GO:0045616	regulation of keratinocyte differentiation	2022-01-29	42/18862	0.0626461	0.191196	0.147831	360	1
BP	GO:0046688	response to copper ion	2022-01-29	42/18862	0.0626461	0.191196	0.147831	5066	1
BP	GO:0062208	positive regulation of pattern recognition receptor signaling pathway	2022-01-29	42/18862	0.0626461	0.191196	0.147831	3304	1
BP	GO:2001239	regulation of extrinsic apoptotic signaling pathway in absence of ligand	2022-01-29	42/18862	0.0626461	0.191196	0.147831	3304	1
BP	GO:0006458	'de novo' protein folding	2022-01-29	43/18862	0.0640905	0.191196	0.147831	3304	1
BP	GO:0009124	nucleoside monophosphate biosynthetic process	2022-01-29	43/18862	0.0640905	0.191196	0.147831	139596	1
BP	GO:0022602	ovulation cycle process	2022-01-29	43/18862	0.0640905	0.191196	0.147831	5066	1
BP	GO:0030517	negative regulation of axon extension	2022-01-29	43/18862	0.0640905	0.191196	0.147831	9723	1
BP	GO:0035315	hair cell differentiation	2022-01-29	43/18862	0.0640905	0.191196	0.147831	84189	1
BP	GO:0045454	cell redox homeostasis	2022-01-29	43/18862	0.0640905	0.191196	0.147831	23530	1
BP	GO:0061383	trabecula morphogenesis	2022-01-29	43/18862	0.0640905	0.191196	0.147831	653	1
BP	GO:0008631	intrinsic apoptotic signaling pathway in response to oxidative stress	2022-01-29	44/18862	0.0655327	0.19355	0.149652	29979	1
BP	GO:0010761	fibroblast migration	2022-01-29	44/18862	0.0655327	0.19355	0.149652	9590	1
BP	GO:0060711	labyrinthine layer development	2022-01-29	44/18862	0.0655327	0.19355	0.149652	653	1
BP	GO:0021545	cranial nerve development	2022-01-29	45/18862	0.0669728	0.193685	0.149756	84189	1
BP	GO:0031018	endocrine pancreas development	2022-01-29	45/18862	0.0669728	0.193685	0.149756	653	1
BP	GO:0048701	embryonic cranial skeleton morphogenesis	2022-01-29	45/18862	0.0669728	0.193685	0.149756	2778	1
BP	GO:0060986	endocrine hormone secretion	2022-01-29	45/18862	0.0669728	0.193685	0.149756	2778	1
BP	GO:0090102	cochlea development	2022-01-29	45/18862	0.0669728	0.193685	0.149756	84189	1
BP	GO:0048562	embryonic organ morphogenesis	2029-02-01	277/18862	0.0673021	0.193685	0.149756	84189/2778	2
BP	GO:0015980	energy derivation by oxidation of organic compounds	2029-02-01	278/18862	0.0677266	0.193685	0.149756	23530/2778	2
BP	GO:0050708	regulation of protein secretion	2029-02-01	279/18862	0.068152	0.193685	0.149756	5066/6833	2
BP	GO:0002686	negative regulation of leukocyte migration	2022-01-29	46/18862	0.0684107	0.193685	0.149756	653	1
BP	GO:0010171	body morphogenesis	2022-01-29	46/18862	0.0684107	0.193685	0.149756	2778	1
BP	GO:0050919	negative chemotaxis	2022-01-29	46/18862	0.0684107	0.193685	0.149756	9723	1
BP	GO:0051489	regulation of filopodium assembly	2022-01-29	46/18862	0.0684107	0.193685	0.149756	1809	1
BP	GO:2001258	negative regulation of cation channel activity	2022-01-29	46/18862	0.0684107	0.193685	0.149756	29979	1
BP	GO:0045646	regulation of erythrocyte differentiation	2022-01-29	47/18862	0.0698465	0.195924	0.151487	3304	1
BP	GO:0099054	presynapse assembly	2022-01-29	47/18862	0.0698465	0.195924	0.151487	84189	1
BP	GO:0097193	intrinsic apoptotic signaling pathway	2029-02-01	283/18862	0.0698628	0.195924	0.151487	6201/29979	2
BP	GO:0002067	glandular epithelial cell differentiation	2022-01-29	48/18862	0.0712802	0.198646	0.153592	653	1
BP	GO:0010862	positive regulation of pathway-restricted SMAD protein phosphorylation	2022-01-29	48/18862	0.0712802	0.198646	0.153592	653	1
BP	GO:0060485	mesenchyme development	2029-02-01	287/18862	0.0715879	0.19888	0.153773	653/9723	2
BP	GO:0001961	positive regulation of cytokine-mediated signaling pathway	2022-01-29	49/18862	0.0727117	0.199508	0.154258	3304	1
BP	GO:0072132	mesenchyme morphogenesis	2022-01-29	49/18862	0.0727117	0.199508	0.154258	653	1
BP	GO:0120178	steroid hormone biosynthetic process	2022-01-29	49/18862	0.0727117	0.199508	0.154258	653	1
BP	GO:2000059	negative regulation of ubiquitin-dependent protein catabolic process	2022-01-29	49/18862	0.0727117	0.199508	0.154258	6201	1
CC	GO:0016235	aggresome	2022-02-28	35/19520	0.00114652	0.0540431	0.0456504	29979/3304	2
CC	GO:0005925	focal adhesion	2022-04-28	416/19520	0.00277602	0.0540431	0.0456504	6201/5297/3304/9590	4
CC	GO:0030055	cell-substrate junction	2022-04-28	423/19520	0.00294798	0.0540431	0.0456504	6201/5297/3304/9590	4
CC	GO:0018995	host cellular component	2022-02-28	60/19520	0.00333599	0.0540431	0.0456504	129401/5297	2
CC	GO:0043657	host cell	2022-02-28	60/19520	0.00333599	0.0540431	0.0456504	129401/5297	2
CC	GO:0016234	inclusion body	2022-02-28	74/19520	0.00502806	0.0678787	0.0573375	29979/3304	2
CC	GO:1905368	peptidase complex	2022-02-28	92/19520	0.00766957	0.0887478	0.0749657	29979/90701	2
CC	GO:0005652	nuclear lamina	2022-01-28	10/19520	0.0142553	0.144335	0.12192	129401	1
CC	GO:0044615	nuclear pore nuclear basket	2022-01-28	12/19520	0.0170827	0.149798	0.126535	129401	1
CC	GO:0098992	neuronal dense core vesicle	2022-01-28	13/19520	0.0184935	0.149798	0.126535	7857	1
MF	GO:0015924	mannosyl-oligosaccharide mannosidase activity	2022-01-28	10/18337	0.0151689	0.161498	0.123281	4121	1
MF	GO:0035374	chondroitin sulfate binding	2022-01-28	10/18337	0.0151689	0.161498	0.123281	1809	1
MF	GO:0015166	polyol transmembrane transporter activity	2022-01-28	11/18337	0.0166735	0.161498	0.123281	360	1
MF	GO:0008179	adenylate cyclase binding	2022-01-28	12/18337	0.0181759	0.161498	0.123281	9590	1
MF	GO:0015250	water channel activity	2022-01-28	12/18337	0.0181759	0.161498	0.123281	360	1
MF	GO:0016840	carbon-nitrogen lyase activity	2022-01-28	13/18337	0.0196761	0.161498	0.123281	5066	1
MF	GO:0031005	filamin binding	2022-01-28	13/18337	0.0196761	0.161498	0.123281	1809	1
MF	GO:0070700	BMP receptor binding	2022-01-28	13/18337	0.0196761	0.161498	0.123281	653	1
MF	GO:0019842	vitamin binding	2022-02-28	145/18337	0.0205202	0.161498	0.123281	84680/5066	2
MF	GO:0005372	water transmembrane transporter activity	2022-01-28	14/18337	0.0211741	0.161498	0.123281	360	1
MF	GO:0004559	alpha-mannosidase activity	2022-01-28	15/18337	0.0226699	0.161498	0.123281	4121	1
MF	GO:0005159	insulin-like growth factor receptor binding	2022-01-28	16/18337	0.0241634	0.161498	0.123281	2778	1
MF	GO:0015923	mannosidase activity	2022-01-28	16/18337	0.0241634	0.161498	0.123281	4121	1
MF	GO:0050780	dopamine receptor binding	2022-01-28	16/18337	0.0241634	0.161498	0.123281	2778	1
MF	GO:0052742	phosphatidylinositol kinase activity	2022-01-28	17/18337	0.0256548	0.161498	0.123281	5297	1
MF	GO:0055106	ubiquitin-protein transferase regulator activity	2022-01-28	18/18337	0.027144	0.161498	0.123281	6201	1
MF	GO:0031683	G-protein beta/gamma-subunit complex binding	2022-01-28	19/18337	0.028631	0.161498	0.123281	2778	1
MF	GO:0031418	L-ascorbic acid binding	2022-01-28	20/18337	0.0301157	0.161498	0.123281	5066	1
MF	GO:0031690	adrenergic receptor binding	2022-01-28	20/18337	0.0301157	0.161498	0.123281	2778	1
MF	GO:0005385	zinc ion transmembrane transporter activity	2022-01-28	21/18337	0.0315983	0.161498	0.123281	25800	1
MF	GO:0051428	peptide hormone receptor binding	2022-01-28	21/18337	0.0315983	0.161498	0.123281	2778	1
MF	GO:0005242	inward rectifier potassium channel activity	2022-01-28	22/18337	0.0330788	0.161498	0.123281	6833	1
MF	GO:0030215	semaphorin receptor binding	2022-01-28	23/18337	0.034557	0.161498	0.123281	9723	1
MF	GO:0035255	ionotropic glutamate receptor binding	2022-01-28	23/18337	0.034557	0.161498	0.123281	2778	1
MF	GO:0070003	threonine-type peptidase activity	2022-01-28	24/18337	0.036033	0.161498	0.123281	80150	1
MF	GO:0070696	transmembrane receptor protein serine/threonine kinase binding	2022-01-28	24/18337	0.036033	0.161498	0.123281	653	1
MF	GO:0048018	receptor ligand activity	2022-03-28	486/18337	0.0371127	0.161498	0.123281	7857/653/9723	3
MF	GO:0008266	poly(U) RNA binding	2022-01-28	25/18337	0.0375069	0.161498	0.123281	6201	1
MF	GO:0030546	signaling receptor activator activity	2022-03-28	492/18337	0.0382751	0.161498	0.123281	7857/653/9723	3
MF	GO:0048027	mRNA 5'-UTR binding	2022-01-28	26/18337	0.0389786	0.161498	0.123281	6201	1
MF	GO:0045499	chemorepellent activity	2022-01-28	27/18337	0.0404482	0.161498	0.123281	9723	1
MF	GO:0008187	poly-pyrimidine tract binding	2022-01-28	28/18337	0.0419155	0.161498	0.123281	6201	1
MF	GO:0017056	structural constituent of nuclear pore	2022-01-28	28/18337	0.0419155	0.161498	0.123281	129401	1
MF	GO:0033612	receptor serine/threonine kinase binding	2022-01-28	28/18337	0.0419155	0.161498	0.123281	653	1
MF	GO:0051787	misfolded protein binding	2022-01-28	29/18337	0.0433807	0.162368	0.123945	3304	1
MF	GO:0005125	cytokine activity	2022-02-28	235/18337	0.049697	0.175811	0.134207	7857/653	2
MF	GO:0044183	protein folding chaperone	2022-01-28	36/18337	0.0535768	0.175811	0.134207	3304	1
MF	GO:0015144	carbohydrate transmembrane transporter activity	2022-01-28	37/18337	0.0550248	0.175811	0.134207	360	1
MF	GO:0042056	chemoattractant activity	2022-01-28	37/18337	0.0550248	0.175811	0.134207	7857	1
MF	GO:0046915	transition metal ion transmembrane transporter activity	2022-01-28	37/18337	0.0550248	0.175811	0.134207	25800	1
MF	GO:0071855	neuropeptide receptor binding	2022-01-28	37/18337	0.0550248	0.175811	0.134207	2778	1
MF	GO:0035254	glutamate receptor binding	2022-01-28	41/18337	0.0607955	0.189624	0.144751	2778	1
MF	GO:0019829	ATPase-coupled cation transmembrane transporter activity	2022-01-28	44/18337	0.0651011	0.198331	0.151398	6833	1
MF	GO:0042625	ATPase-coupled ion transmembrane transporter activity	2022-01-28	46/18337	0.067961	0.199531	0.152314	6833	1
MF	GO:0001664	G protein-coupled receptor binding	2022-02-28	289/18337	0.0715539	0.199531	0.152314	2778/3304	2
MF	GO:1901618	organic hydroxy compound transmembrane transporter activity	2022-01-28	49/18337	0.072235	0.199531	0.152314	360	1
MF	GO:0031593	polyubiquitin modification-dependent protein binding	2022-01-28	51/18337	0.0750738	0.199531	0.152314	29979	1
MF	GO:0051018	protein kinase A binding	2022-01-28	51/18337	0.0750738	0.199531	0.152314	9590	1
MF	GO:0050661	NADP binding	2022-01-28	53/18337	0.0779043	0.199531	0.152314	23530	1
MF	GO:0051287	NAD binding	2022-01-28	53/18337	0.0779043	0.199531	0.152314	23530	1
MF	GO:0030170	pyridoxal phosphate binding	2022-01-28	55/18337	0.0807264	0.199531	0.152314	84680	1
MF	GO:0042887	amide transmembrane transporter activity	2022-01-28	55/18337	0.0807264	0.199531	0.152314	360	1
MF	GO:0070279	vitamin B6 binding	2022-01-28	55/18337	0.0807264	0.199531	0.152314	84680	1

## Sheet: Table S12
ONTOLOGY	ID	Description	GeneRatio	BgRatio	pvalue	p.adjust	qvalue	geneID	Count
